# Supplementary material for: Human DCP1 is crucial for mRNA decapping and possesses paralog-specific gene regulating functions
Source: eLife journal article supplement (doi:10.7554/elife.94811), 2024-02-05

**Figure 1**

**B**

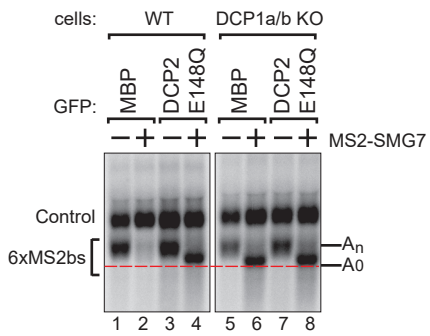

**B**

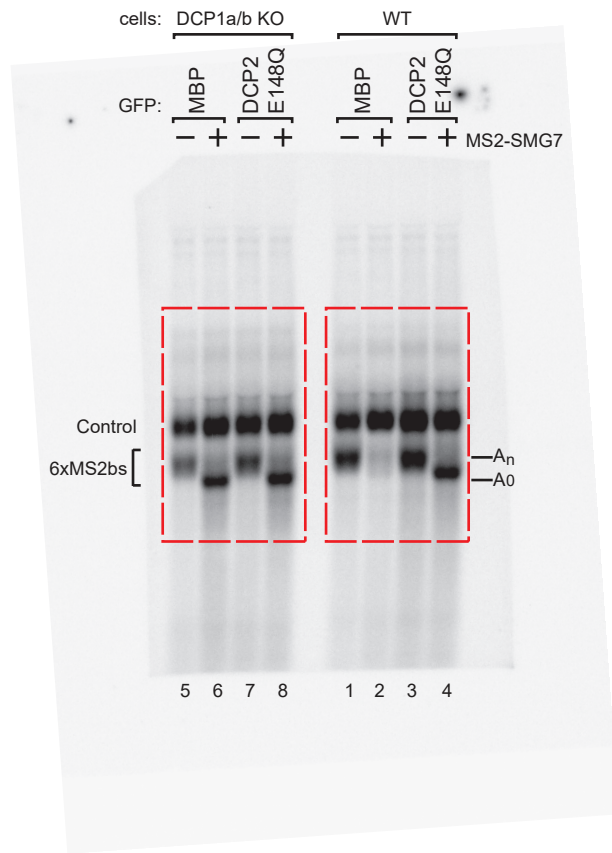

Supplement: fig1-data2 [file elife-94811-fig1-data2-v1.pdf]
