# Supplementary material for: Human DCP1 is crucial for mRNA decapping and possesses paralog-specific gene regulating functions
Source: eLife journal article supplement (doi:10.7554/elife.94811), 2024-02-05

Figure 1-figure supplement 2

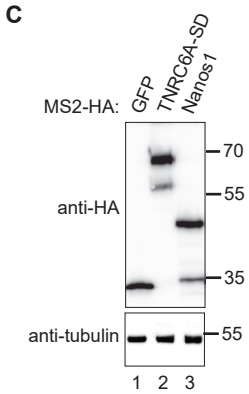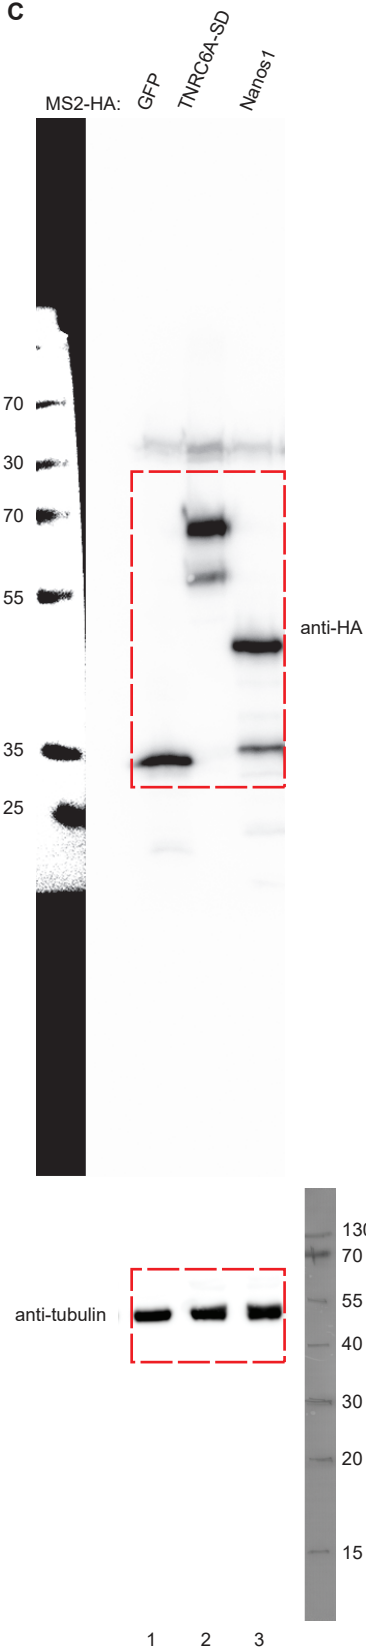

Supplement: fig1-figsupp2-data4 [file elife-94811-fig1-figsupp2-data4-v1.pdf]
