# Supplementary material for: Human DCP1 is crucial for mRNA decapping and possesses paralog-specific gene regulating functions
Source: eLife journal article supplement (doi:10.7554/elife.94811), 2024-02-05

# Figure 2-figure supplement 1

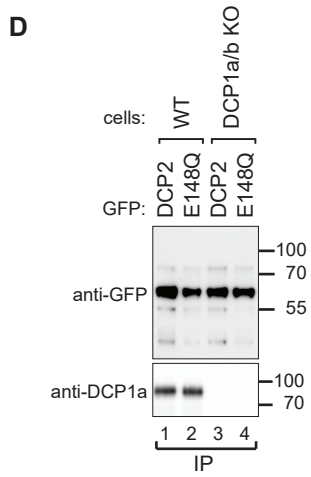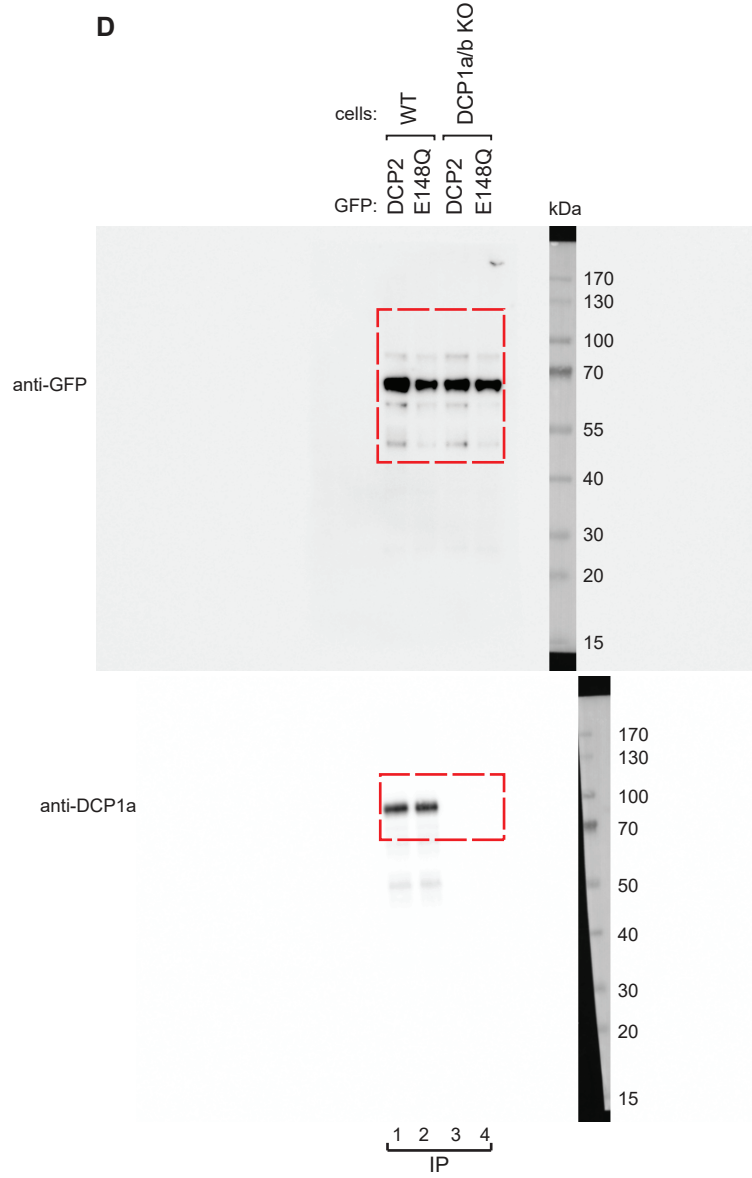

Supplement: fig2-figsupp1-data2 [file elife-94811-fig2-figsupp1-data2-v1.pdf]
