# Supplementary material for: Human DCP1 is crucial for mRNA decapping and possesses paralog-specific gene regulating functions
Source: eLife journal article supplement (doi:10.7554/elife.94811), 2024-02-05

Figure 3

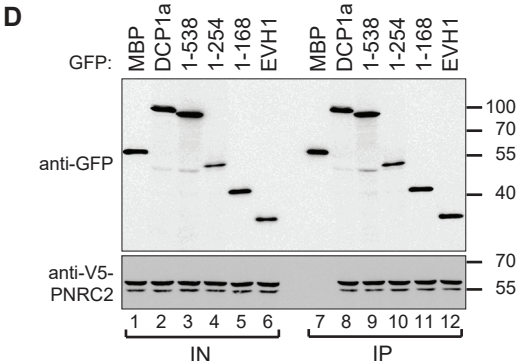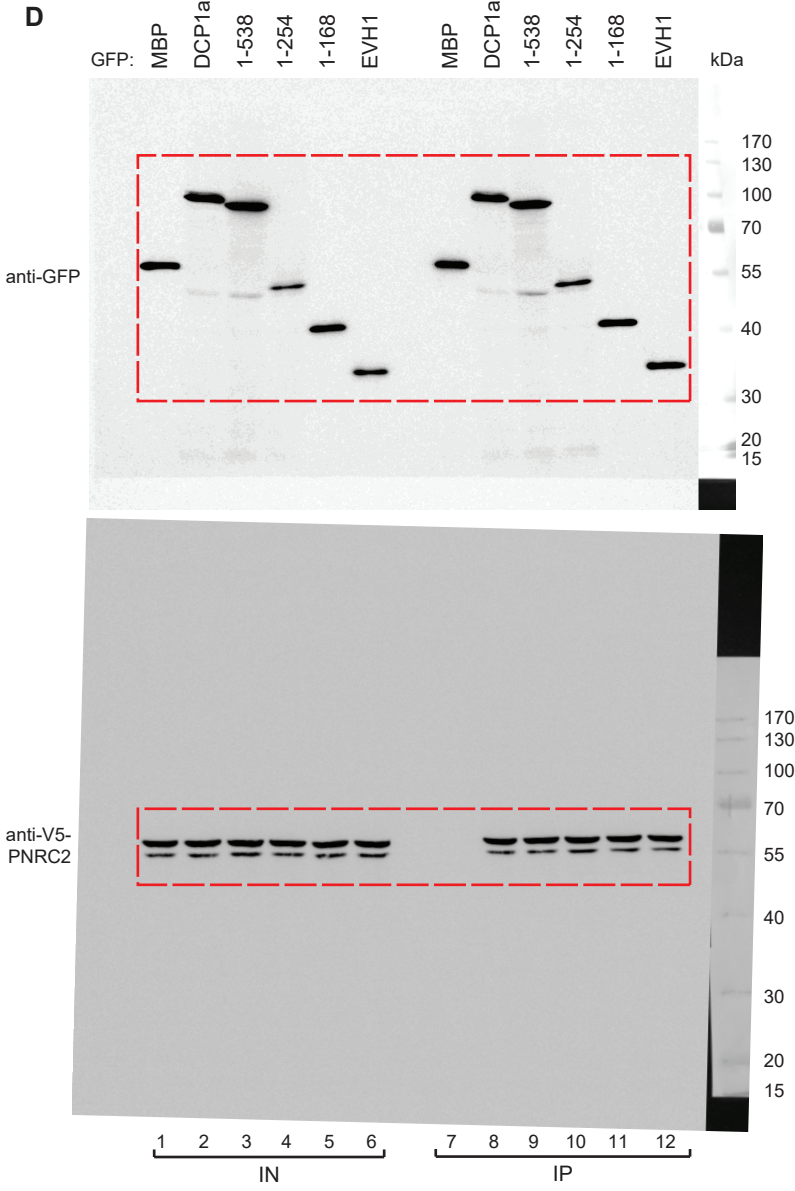

Supplement: fig3-data8 [file elife-94811-fig3-data8-v1.pdf]
