# Supplementary material for: Human DCP1 is crucial for mRNA decapping and possesses paralog-specific gene regulating functions
Source: eLife journal article supplement (doi:10.7554/elife.94811), 2024-02-05

**Figure 3**

**E**

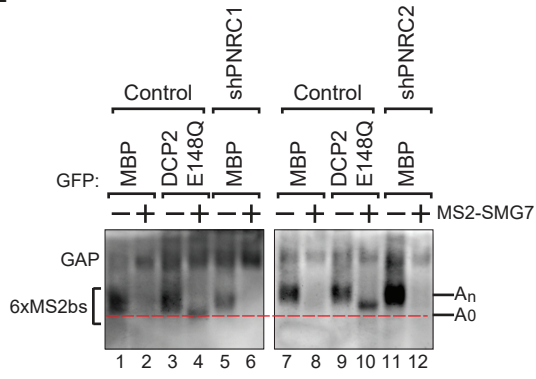

**E**

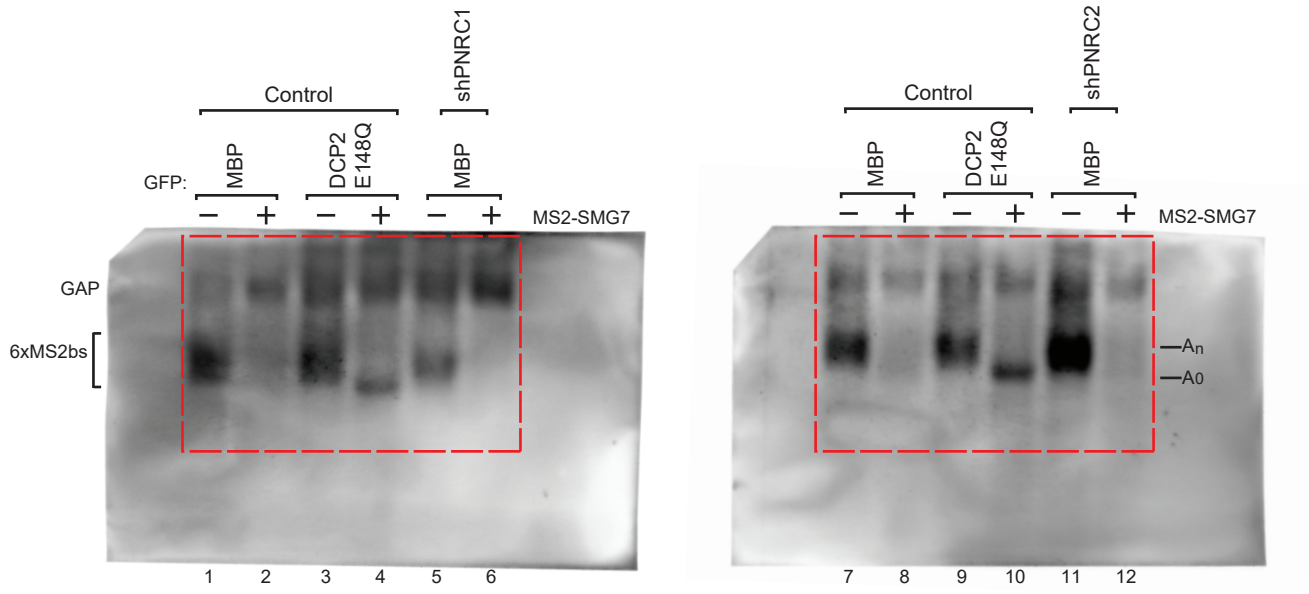

Supplement: fig3-data10 [file elife-94811-fig3-data10-v1.pdf]
