# Supplementary material for: Human DCP1 is crucial for mRNA decapping and possesses paralog-specific gene regulating functions
Source: eLife journal article supplement (doi:10.7554/elife.94811), 2024-02-05

**Figure 3**

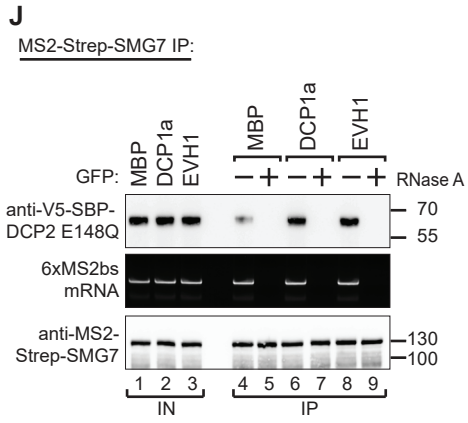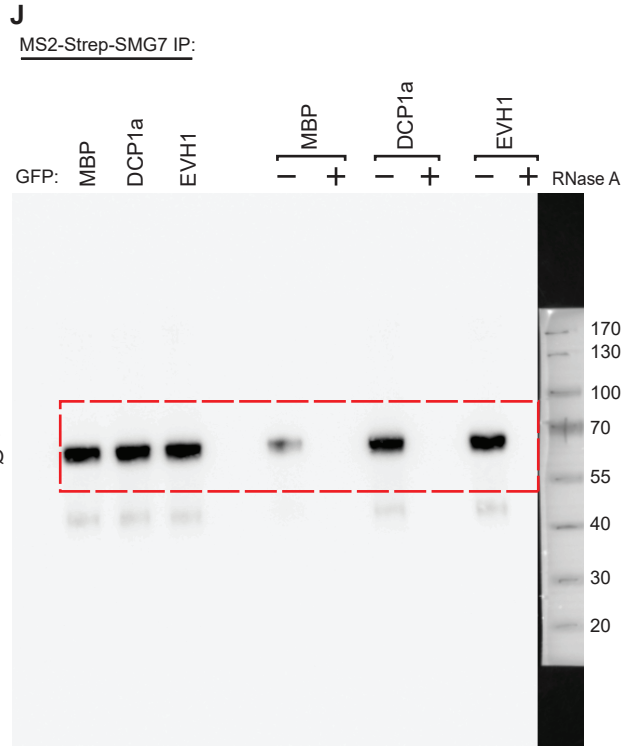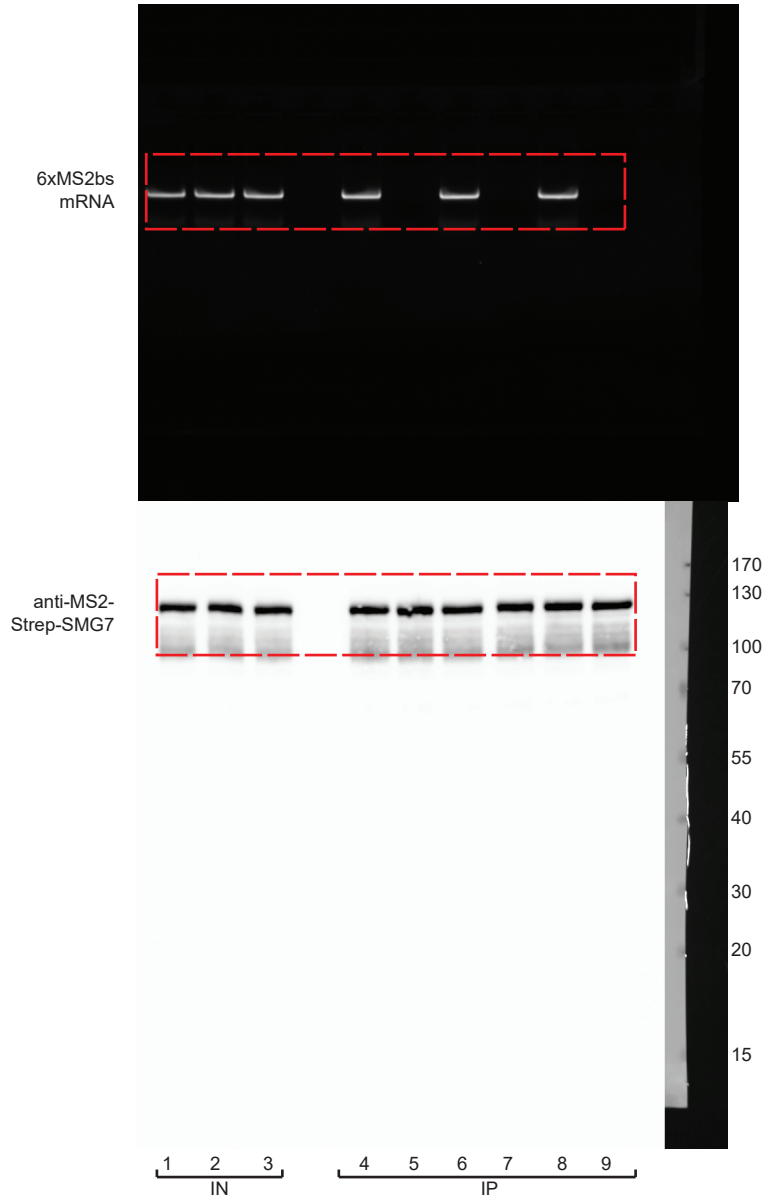

Supplement: fig3-data14 [file elife-94811-fig3-data14-v1.pdf]
