# Supplementary material for: Human DCP1 is crucial for mRNA decapping and possesses paralog-specific gene regulating functions
Source: eLife. 2024 Nov 1;13:RP94811. doi: 10.7554/eLife.94811 (PMC11530239; doi:10.7554/eLife.94811)
Supplement: Supplementary file 1. — (a) Differentially expressed genes identified by comparing transcriptomes between DCP1a knockout and wild-type samples. (b) Differentially expressed genes identified by comparing transcriptomes between DCP1b knockout and wild-type samples. (c) Differentially expressed genes identified by comparing transcriptomes between DCP1a/b knockout and wild-type samples. [file elife-94811-supp1.xlsx]

## Sheet: DCP1aKO_WT
Supplementary File 1a. Differentially Expressed Genes Identified by Comparing Transcriptomes between DCP1a Knockout and Wild Type Samples
geneID	baseMean	log2FoldChange	lfcSE	pvalue	padj	havana_gene	gene_name	hgnc_id
ENSG00000128918.15	1656.96	1.59038	0.0950874	5.05317e-64	9.23314e-60	OTTHUMG00000132624.6	ALDH1A2	HGNC:15472
ENSG00000070010.19	3025.37	1.37999	0.0871159	1.02477e-57	9.36227e-54	OTTHUMG00000150130.16	UFD1	HGNC:12520
ENSG00000101160.14	282.362	-7.00271	0.46752	3.27425e-50	1.99424e-46	OTTHUMG00000032858.3	CTSZ	HGNC:2547
ENSG00000100181.22	90.9592	3.76993	0.26109	2.84494e-48	1.08969e-44	OTTHUMG00000191859.4	TPTEP1	HGNC:43648
ENSG00000100280.16	8092.85	0.84301	0.0588316	2.98185e-48	1.08969e-44	OTTHUMG00000151109.4	AP1B1	HGNC:554
ENSG00000249196.6	97.5793	5.42679	0.374804	5.44133e-48	1.65707e-44	OTTHUMG00000168401.1	TMEM132D-AS1	HGNC:27466
ENSG00000184613.10	706.849	-1.53436	0.110105	2.17976e-45	5.68978e-42	OTTHUMG00000169464.2	NELL2	HGNC:7751
ENSG00000253898.1	623.531	-3.62804	0.263435	6.74075e-44	1.53959e-40	OTTHUMG00000164609.1	LINC01419	HGNC:50712
ENSG00000152092.16	89.107	4.9558	0.361753	2.83944e-43	5.7647e-40	OTTHUMG00000035041.3	ASTN1	HGNC:773
ENSG00000128965.13	613.734	1.9771	0.150342	9.62251e-41	1.75823e-37	OTTHUMG00000130208.11	CHAC1	HGNC:28680
ENSG00000283633.1	76.0216	4.22577	0.322411	3.25745e-40	5.41092e-37	OTTHUMG00000141300.11	AP000547.3
ENSG00000137203.13	1354.48	0.988934	0.0793663	8.49846e-37	1.29403e-33	OTTHUMG00000014235.8	TFAP2A	HGNC:11742
ENSG00000107562.16	215.35	1.85881	0.150779	4.20027e-36	5.90364e-33	OTTHUMG00000018054.2	CXCL12	HGNC:10672
ENSG00000136813.14	4673.79	-0.915905	0.0744346	6.92501e-36	9.03813e-33	OTTHUMG00000020489.5	ECPAS	HGNC:29020
ENSG00000272886.6	788.127	-2.00066	0.164903	3.53918e-35	4.3112e-32	OTTHUMG00000158193.8	DCP1A	HGNC:18714
ENSG00000111331.13	339.299	-7.71358	0.641019	1.9872e-32	2.26938e-29	OTTHUMG00000169795.3	OAS3	HGNC:8088
ENSG00000100304.13	4382.14	0.773091	0.0666186	4.42189e-32	4.75275e-29	OTTHUMG00000150682.4	TTLL12	HGNC:28974
ENSG00000150687.12	907.846	1.18893	0.103769	1.45808e-31	1.48012e-28	OTTHUMG00000167226.4	PRSS23	HGNC:14370
ENSG00000093009.10	5135.63	1.18473	0.104597	7.14788e-31	6.874e-28	OTTHUMG00000150386.3	CDC45	HGNC:1739
ENSG00000148187.18	1323.16	-0.874484	0.0783068	4.6268e-30	4.22705e-27	OTTHUMG00000020600.7	MRRF	HGNC:7234
ENSG00000176046.8	534.067	2.25669	0.204789	1.66542e-29	1.44907e-26	OTTHUMG00000131764.3	NUPR1	HGNC:29990
ENSG00000100325.15	3213.48	0.813202	0.074265	6.04309e-29	5.01906e-26	OTTHUMG00000067658.7	ASCC2	HGNC:24103
ENSG00000167123.19	1519.71	-0.902266	0.082749	8.70234e-29	6.91344e-26	OTTHUMG00000020747.6	CERCAM	HGNC:23723
ENSG00000005073.6	1188.95	0.981712	0.0904563	1.41468e-28	1.07704e-25	OTTHUMG00000023437.7	HOXA11	HGNC:5101
ENSG00000253293.5	2087.26	0.909858	0.0842725	3.21616e-28	2.35063e-25	OTTHUMG00000023436.7	HOXA10	HGNC:5100
ENSG00000100297.16	10259.3	0.943714	0.0880479	6.62716e-28	4.65737e-25	OTTHUMG00000150961.19	MCM5	HGNC:6948
ENSG00000198729.5	396.989	1.26094	0.119438	3.15834e-27	2.13738e-24	OTTHUMG00000015818.2	PPP1R14C	HGNC:14952
ENSG00000054983.17	62.0965	-3.56292	0.339193	1.11105e-26	7.25042e-24	OTTHUMG00000028646.4	GALC	HGNC:4115
ENSG00000099940.12	2148.94	0.797189	0.0763294	1.39599e-26	8.50248e-24	OTTHUMG00000150765.7	SNAP29	HGNC:11133
ENSG00000148358.19	2330.57	-0.758851	0.0726375	1.38284e-26	8.50248e-24	OTTHUMG00000020804.5	GPR107	HGNC:17830
ENSG00000138942.16	2123.46	0.679059	0.0656621	4.86232e-26	2.86595e-23	OTTHUMG00000151253.4	RNF185	HGNC:26783
ENSG00000106263.18	12577.6	0.589921	0.0571819	1.16012e-25	6.42355e-23	OTTHUMG00000022839.6	EIF3B	HGNC:3280
ENSG00000174469.23	1195.54	1.08544	0.106267	1.14666e-25	6.42355e-23	OTTHUMG00000152743.11	CNTNAP2	HGNC:13830
ENSG00000168209.5	4089.29	1.14417	0.112304	1.49425e-25	8.03025e-23	OTTHUMG00000183961.3	DDIT4	HGNC:24944
ENSG00000198075.10	305.919	1.37181	0.135061	1.86165e-25	9.71886e-23	OTTHUMG00000130958.4	SULT1C4	HGNC:11457
ENSG00000121413.12	219.333	-2.23865	0.220851	2.05955e-25	1.04534e-22	OTTHUMG00000183451.2	ZSCAN18	HGNC:21037
ENSG00000126883.17	3015.04	-1.25341	0.123679	2.40573e-25	1.18804e-22	OTTHUMG00000020816.11	NUP214	HGNC:8064
ENSG00000205560.12	446.442	-1.50893	0.150327	6.54416e-25	3.14671e-22	OTTHUMG00000137390.12	CPT1B	HGNC:2329
ENSG00000100345.21	21760	0.823864	0.0815649	7.75643e-25	3.63399e-22	OTTHUMG00000030429.9	MYH9	HGNC:7579
ENSG00000095397.15	626.446	-1.05457	0.105796	1.50525e-24	6.876e-22	OTTHUMG00000020539.6	WHRN	HGNC:16361
ENSG00000106004.5	2116.78	0.995093	0.100635	3.16322e-24	1.40971e-21	OTTHUMG00000023214.4	HOXA5	HGNC:5106
ENSG00000070061.15	3636.94	-0.668783	0.0676334	4.78377e-24	2.03277e-21	OTTHUMG00000020465.9	ELP1	HGNC:5959
ENSG00000106976.20	1546.02	-1.16998	0.118875	4.67998e-24	2.03277e-21	OTTHUMG00000020733.13	DNM1	HGNC:2972
ENSG00000121871.4	184.208	-1.77499	0.180758	5.57438e-24	2.31489e-21	OTTHUMG00000158072.5	SLITRK3	HGNC:23501
ENSG00000079974.17	693.595	-0.902742	0.0921625	9.26384e-24	3.76153e-21	OTTHUMG00000150156.5	RABL2B	HGNC:9800
ENSG00000183963.18	1892.94	0.967095	0.0991452	1.33628e-23	5.30795e-21	OTTHUMG00000151203.8	SMTN	HGNC:11126
ENSG00000105993.15	4419.08	0.717098	0.0743859	2.74783e-23	1.04601e-20	OTTHUMG00000157242.7	DNAJB6	HGNC:14888
ENSG00000237836.6	97.2286	-2.54612	0.263353	2.70054e-23	1.04601e-20	OTTHUMG00000021220.2	PHKA2-AS1	HGNC:44110
ENSG00000196739.15	1043.28	-1.05966	0.10969	2.99353e-23	1.09396e-20	OTTHUMG00000020537.5	COL27A1	HGNC:22986
ENSG00000240303.8	2077.96	-0.776916	0.0801223	2.98105e-23	1.09396e-20	OTTHUMG00000159780.6	ACAD11	HGNC:30211
ENSG00000180730.4	592.655	1.30655	0.136299	5.96912e-23	2.13858e-20	OTTHUMG00000016612.2	SHISA2	HGNC:20366
ENSG00000176915.15	3793.59	0.626403	0.0650561	7.38062e-23	2.59344e-20	OTTHUMG00000168046.4	ANKLE2	HGNC:29101
ENSG00000240990.10	567.264	1.35957	0.142953	1.17049e-22	4.03531e-20	OTTHUMG00000158205.4	HOXA11-AS	HGNC:24957
ENSG00000102393.11	4070.38	-0.875824	0.0930791	3.80098e-22	1.28614e-19	OTTHUMG00000022026.6	GLA	HGNC:4296
ENSG00000177108.5	398.925	-1.07052	0.114326	4.99606e-22	1.65978e-19	OTTHUMG00000171575.3	ZDHHC22	HGNC:20106
ENSG00000100038.19	2568.99	0.665279	0.0708403	6.04452e-22	1.97224e-19	OTTHUMG00000167438.2	TOP3B	HGNC:11993
ENSG00000092068.20	616.518	0.907735	0.0970904	6.58515e-22	2.07455e-19	OTTHUMG00000028720.6	SLC7A8	HGNC:11066
ENSG00000105991.9	429.874	0.991177	0.106024	6.55757e-22	2.07455e-19	OTTHUMG00000023207.5	HOXA1	HGNC:5099
ENSG00000128159.12	2420.72	-1.0646	0.114103	6.96093e-22	2.15577e-19	OTTHUMG00000030150.7	TUBGCP6	HGNC:18127
ENSG00000159873.10	3469.29	0.694288	0.0746356	1.49844e-21	4.48845e-19	OTTHUMG00000151091.3	CCDC117	HGNC:26599
ENSG00000184708.18	1738.98	0.643258	0.0691068	1.47521e-21	4.48845e-19	OTTHUMG00000030793.13	EIF4ENIF1	HGNC:16687
ENSG00000106031.9	969.626	1.15757	0.1253	1.63001e-21	4.8038e-19	OTTHUMG00000023438.10	HOXA13	HGNC:5102
ENSG00000100220.12	5394.23	0.735203	0.0792819	1.84239e-21	5.34352e-19	OTTHUMG00000030300.8	RTCB	HGNC:26935
ENSG00000048740.18	464.316	1.23919	0.135186	3.27329e-21	9.34525e-19	OTTHUMG00000017668.8	CELF2	HGNC:2550
ENSG00000178498.16	199.853	-7.80729	0.807466	3.85211e-21	1.08286e-18	OTTHUMG00000170189.3	DTX3	HGNC:24457
ENSG00000185686.18	2827.16	0.850684	0.09282	4.13462e-21	1.14466e-18	OTTHUMG00000151172.4	PRAME	HGNC:9336
ENSG00000186575.18	2552.05	0.611334	0.0665704	5.24931e-21	1.43157e-18	OTTHUMG00000030727.5	NF2	HGNC:7773
ENSG00000148798.11	1384.15	-0.668474	0.0737894	1.34936e-20	3.62581e-18	OTTHUMG00000018986.2	INA	HGNC:6057
ENSG00000163584.18	648.081	-1.44226	0.160254	1.37457e-20	3.64003e-18	OTTHUMG00000158957.3	RPL22L1	HGNC:27610
ENSG00000136240.10	3326.29	0.658661	0.0728025	1.62211e-20	4.23416e-18	OTTHUMG00000023103.5	KDELR2	HGNC:6305
ENSG00000130707.18	2053.92	-0.884773	0.0987045	2.52712e-20	6.5036e-18	OTTHUMG00000020806.5	ASS1	HGNC:758
ENSG00000132164.10	306.315	-1.15188	0.129489	3.85825e-20	9.79138e-18	OTTHUMG00000129718.3	SLC6A11	HGNC:11044
ENSG00000185721.13	3645.81	0.837447	0.093887	4.00155e-20	1.00159e-17	OTTHUMG00000030792.12	DRG1	HGNC:3029
ENSG00000148384.13	1244.67	-0.661076	0.074334	6.28657e-20	1.55227e-17	OTTHUMG00000020927.3	INPP5E	HGNC:21474
ENSG00000242259.8	1389.9	0.735127	0.0830879	9.44668e-20	2.30146e-17	OTTHUMG00000150137.4	C22orf39	HGNC:27012
ENSG00000101230.6	58.4517	2.53206	0.28759	1.04493e-19	2.51222e-17	OTTHUMG00000031902.3	ISM1	HGNC:16213
ENSG00000112769.20	1107.28	0.973866	0.11077	1.08524e-19	2.57526e-17	OTTHUMG00000015386.10	LAMA4	HGNC:6484
ENSG00000163359.16	90.1292	1.99594	0.228078	1.22921e-19	2.87951e-17	OTTHUMG00000150020.7	COL6A3	HGNC:2213
ENSG00000100266.19	2564.88	0.732742	0.0834546	1.57039e-19	3.63216e-17	OTTHUMG00000150701.8	PACSIN2	HGNC:8571
ENSG00000172936.14	120.245	-2.39567	0.276429	2.93906e-19	6.71282e-17	OTTHUMG00000131083.11	MYD88	HGNC:7562
ENSG00000146535.14	1374.45	0.737587	0.0847823	3.15008e-19	7.10597e-17	OTTHUMG00000023064.6	GNA12	HGNC:4380
ENSG00000135899.17	150.282	-2.69323	0.309024	3.89138e-19	8.67113e-17	OTTHUMG00000133204.6	SP110	HGNC:5401
ENSG00000173258.13	131.238	-7.36424	0.806094	4.29984e-19	9.46586e-17	OTTHUMG00000020490.2	ZNF483	HGNC:23384
ENSG00000107130.10	1372.54	-0.783826	0.0906105	4.4955e-19	9.77877e-17	OTTHUMG00000020801.3	NCS1	HGNC:3953
ENSG00000276644.5	966.716	1.09978	0.127762	5.02078e-19	1.07929e-16	OTTHUMG00000017063.4	DACH1	HGNC:2663
ENSG00000108018.15	187.052	1.66842	0.194353	5.10228e-19	1.08406e-16	OTTHUMG00000019018.5	SORCS1	HGNC:16697
ENSG00000139219.19	992.698	0.962945	0.111954	5.75134e-19	1.20791e-16	OTTHUMG00000149896.7	COL2A1	HGNC:2200
ENSG00000162722.9	55.0285	-3.52128	0.405472	6.25826e-19	1.29944e-16	OTTHUMG00000040203.2	TRIM58	HGNC:24150
ENSG00000100109.17	2061.3	0.680441	0.0790023	7.47797e-19	1.53525e-16	OTTHUMG00000150883.5	TFIP11	HGNC:17165
ENSG00000171956.7	165.621	1.44259	0.168773	8.09155e-19	1.64276e-16	OTTHUMG00000172011.3	FOXB1	HGNC:3799
ENSG00000198093.11	138.259	-2.14359	0.251481	9.56869e-19	1.92131e-16	OTTHUMG00000182423.3	ZNF649	HGNC:25741
ENSG00000156711.17	119.182	-2.08924	0.245676	1.36374e-18	2.70851e-16	OTTHUMG00000014587.2	MAPK13	HGNC:6875
ENSG00000114779.19	1880.9	-0.857679	0.101002	1.55978e-18	3.06454e-16	OTTHUMG00000157816.25	ABHD14B	HGNC:28235
ENSG00000196422.11	1285.55	-0.876969	0.103761	2.3991e-18	4.66344e-16	OTTHUMG00000020904.4	PPP1R26	HGNC:29089
ENSG00000176788.9	1058.36	1.48375	0.176434	2.45134e-18	4.71483e-16	OTTHUMG00000131061.8	BASP1	HGNC:957
ENSG00000164707.15	568.004	0.95804	0.113789	2.80821e-18	5.34496e-16	OTTHUMG00000155539.3	SLC13A4	HGNC:15827
ENSG00000103227.18	295.275	-1.12454	0.135043	5.7179e-18	1.07709e-15	OTTHUMG00000047848.5	LMF1	HGNC:14154
ENSG00000178522.14	77.2296	2.09165	0.2516	6.40516e-18	1.19423e-15	OTTHUMG00000129913.2	AMBN	HGNC:452
ENSG00000250337.7	636.754	-0.837642	0.100984	8.8535e-18	1.63405e-15	OTTHUMG00000161968.34	PURPL	HGNC:48995
ENSG00000233922.3	233.826	-1.45135	0.176304	1.01637e-17	1.85711e-15	OTTHUMG00000090408.4	LINC01694	HGNC:52481
ENSG00000161551.14	70.2926	-2.646	0.320261	1.23437e-17	2.23311e-15	OTTHUMG00000157045.4	ZNF577	HGNC:28673
ENSG00000106829.19	3739.91	0.697326	0.084342	1.60474e-17	2.84677e-15	OTTHUMG00000020072.10	TLE4	HGNC:11840
ENSG00000100429.18	510.813	-1.17276	0.143657	2.11567e-17	3.71707e-15	OTTHUMG00000044647.7	HDAC10	HGNC:18128
ENSG00000142621.19	718.84	0.901219	0.11094	3.50145e-17	6.09319e-15	OTTHUMG00000002088.11	FHAD1	HGNC:29408
ENSG00000196653.12	82.6405	-1.87367	0.231975	4.13831e-17	7.13352e-15	OTTHUMG00000133086.6	ZNF502	HGNC:23718
ENSG00000164778.4	1631.49	0.647603	0.0797168	5.22566e-17	8.92366e-15	OTTHUMG00000151354.1	EN2	HGNC:3343
ENSG00000100239.16	2349.07	-0.61629	0.0760568	6.18718e-17	1.04678e-14	OTTHUMG00000150199.6	PPP6R2	HGNC:19253
ENSG00000106537.8	494.636	0.888462	0.111016	9.98513e-17	1.67384e-14	OTTHUMG00000022968.6	TSPAN13	HGNC:21643
ENSG00000008513.16	563.006	-1.1538	0.145493	1.35603e-16	2.2525e-14	OTTHUMG00000164534.6	ST3GAL1	HGNC:10862
ENSG00000188130.14	1688.71	-0.79837	0.100381	1.5539e-16	2.55791e-14	OTTHUMG00000030145.5	MAPK12	HGNC:6874
ENSG00000164128.7	97.8622	-2.04738	0.258078	1.72678e-16	2.81711e-14	OTTHUMG00000161371.4	NPY1R	HGNC:7956
ENSG00000160323.18	483.422	-0.919232	0.116004	1.75836e-16	2.84324e-14	OTTHUMG00000020876.4	ADAMTS13	HGNC:1366
ENSG00000283189.2	213.909	-1.39462	0.177025	1.9162e-16	3.0713e-14	OTTHUMG00000191676.4	AC104452.1
ENSG00000165185.14	506.36	-0.884158	0.111819	2.10757e-16	3.34866e-14	OTTHUMG00000020508.1	KIAA1958	HGNC:23427
ENSG00000006468.14	63.6381	2.11761	0.269078	2.18669e-16	3.41498e-14	OTTHUMG00000152403.7	ETV1	HGNC:3490
ENSG00000128165.9	301.482	-6.85432	0.819019	2.18043e-16	3.41498e-14	OTTHUMG00000150202.2	ADM2	HGNC:28898
ENSG00000280916.2	253.166	1.10607	0.140437	2.25937e-16	3.49857e-14	OTTHUMG00000189532.2	FOXCUT	HGNC:50650
ENSG00000251129.2	33.0132	3.51201	0.443477	2.29747e-16	3.52768e-14	OTTHUMG00000160440.9	LINC02506	HGNC:53495
ENSG00000266714.9	497.019	-1.15207	0.146729	2.55743e-16	3.89411e-14	OTTHUMG00000179794.10	MYO15B	HGNC:14083
ENSG00000196419.12	26539.9	0.656833	0.0830788	2.89349e-16	4.36941e-14	OTTHUMG00000151190.3	XRCC6	HGNC:4055
ENSG00000101311.15	68.0804	-2.29285	0.292214	3.03259e-16	4.54193e-14	OTTHUMG00000031826.4	FERMT1	HGNC:15889
ENSG00000102003.10	283.138	-1.12516	0.14429	4.10972e-16	6.1051e-14	OTTHUMG00000034557.6	SYP	HGNC:11506
ENSG00000109472.14	2364.68	0.701967	0.0896266	4.88502e-16	7.19832e-14	OTTHUMG00000150252.4	CPE	HGNC:2303
ENSG00000188677.14	906.329	-0.818051	0.104825	5.03519e-16	7.36024e-14	OTTHUMG00000150665.5	PARVB	HGNC:14653
ENSG00000165661.17	1278.9	-0.759042	0.0972053	5.15098e-16	7.46974e-14	OTTHUMG00000020923.3	QSOX2	HGNC:30249
ENSG00000005020.13	1200.31	0.884113	0.113479	5.24538e-16	7.54674e-14	OTTHUMG00000023495.5	SKAP2	HGNC:15687
ENSG00000115750.17	245.681	-1.28943	0.166332	5.63242e-16	8.04028e-14	OTTHUMG00000151673.5	TAF1B	HGNC:11533
ENSG00000118640.11	175.102	1.21897	0.157267	6.09078e-16	8.62719e-14	OTTHUMG00000130180.5	VAMP8	HGNC:12647
ENSG00000171033.13	424.553	0.869188	0.111855	6.28947e-16	8.84009e-14	OTTHUMG00000164618.2	PKIA	HGNC:9017
ENSG00000184481.17	877.543	-0.813708	0.104866	7.13812e-16	9.95631e-14	OTTHUMG00000021789.3	FOXO4	HGNC:7139
ENSG00000158290.17	5133.49	-0.722247	0.0928512	7.2299e-16	1.00079e-13	OTTHUMG00000022302.3	CUL4B	HGNC:2555
ENSG00000120437.9	2051.52	0.88559	0.113523	8.88769e-16	1.22102e-13	OTTHUMG00000015935.2	ACAT2	HGNC:94
ENSG00000182541.18	1060.12	0.654263	0.0844445	1.0247e-15	1.39727e-13	OTTHUMG00000151251.3	LIMK2	HGNC:6614
ENSG00000104490.18	167.127	1.20244	0.157388	1.52389e-15	2.05486e-13	OTTHUMG00000164876.8	NCALD	HGNC:7655
ENSG00000162670.11	106.727	-1.55575	0.203985	1.52945e-15	2.05486e-13	OTTHUMG00000035533.7	BRINP3	HGNC:22393
ENSG00000136859.10	44.7234	-3.03282	0.395962	1.79981e-15	2.39779e-13	OTTHUMG00000020695.2	ANGPTL2	HGNC:490
ENSG00000159247.13	495.952	-0.855544	0.11216	1.81094e-15	2.39779e-13	OTTHUMG00000021001.4	TUBBP5	HGNC:23674
ENSG00000237289.9	1693.26	-1.04064	0.136898	1.89633e-15	2.49279e-13	OTTHUMG00000059900.7	CKMT1B	HGNC:1995
ENSG00000130540.14	428.62	-0.915585	0.120178	1.91868e-15	2.50415e-13	OTTHUMG00000141314.3	SULT4A1	HGNC:14903
ENSG00000165699.15	1805.11	-0.639627	0.0835388	2.04764e-15	2.63482e-13	OTTHUMG00000020844.14	TSC1	HGNC:12362
ENSG00000130766.5	4190	0.841095	0.111226	2.18721e-15	2.79474e-13	OTTHUMG00000003532.2	SESN2	HGNC:20746
ENSG00000160271.16	1597.1	-0.725063	0.0951767	2.41315e-15	3.06202e-13	OTTHUMG00000020858.5	RALGDS	HGNC:9842
ENSG00000223756.6	57.0126	1.9546	0.25836	2.46468e-15	3.10584e-13	OTTHUMG00000011705.3	TSSC2	HGNC:12384
ENSG00000160447.7	1832.7	-0.759061	0.100436	3.88462e-15	4.84807e-13	OTTHUMG00000020757.2	PKN3	HGNC:17999
ENSG00000247077.7	2007.09	0.811988	0.107635	3.90032e-15	4.84807e-13	OTTHUMG00000168021.3	PGAM5	HGNC:28763
ENSG00000112972.15	2072.12	0.662089	0.0877595	4.49624e-15	5.55103e-13	OTTHUMG00000162231.3	HMGCS1	HGNC:5007
ENSG00000242474.3	295.822	1.01774	0.135785	4.82412e-15	5.91586e-13	OTTHUMG00000151405.11	AC093627.5
ENSG00000175287.19	734.306	-0.832054	0.111466	6.71547e-15	8.18033e-13	OTTHUMG00000020764.20	PHYHD1	HGNC:23396
ENSG00000002822.15	1745.55	0.817224	0.109578	7.41902e-15	8.97751e-13	OTTHUMG00000151493.7	MAD1L1	HGNC:6762
ENSG00000136861.18	4131.19	-0.643829	0.0861805	7.51951e-15	9.03924e-13	OTTHUMG00000021043.5	CDK5RAP2	HGNC:18672
ENSG00000106006.6	557.572	1.16258	0.156786	7.98335e-15	9.5341e-13	OTTHUMG00000023216.9	HOXA6	HGNC:5107
ENSG00000077943.8	507.884	0.904613	0.121898	8.96293e-15	1.05658e-12	OTTHUMG00000017733.2	ITGA8	HGNC:6144
ENSG00000099901.17	12800.6	0.885575	0.119296	8.94649e-15	1.05658e-12	OTTHUMG00000150490.35	RANBP1	HGNC:9847
ENSG00000122565.19	5597.16	0.670694	0.0900523	1.02359e-14	1.19127e-12	OTTHUMG00000022911.6	CBX3	HGNC:1553
ENSG00000008277.14	543.678	-0.90718	0.123239	1.32515e-14	1.52284e-12	OTTHUMG00000137417.10	ADAM22	HGNC:201
ENSG00000160360.13	2191.91	-0.669957	0.0906993	1.38126e-14	1.57739e-12	OTTHUMG00000020930.8	GPSM1	HGNC:17858
ENSG00000069998.12	1996.68	-0.71319	0.0965899	1.47947e-14	1.67906e-12	OTTHUMG00000150071.2	HDHD5	HGNC:1843
ENSG00000174672.16	1037.56	-0.686639	0.0930483	1.61045e-14	1.80529e-12	OTTHUMG00000167089.4	BRSK2	HGNC:11405
ENSG00000167113.11	1187.11	-0.700664	0.0952218	1.83416e-14	2.04352e-12	OTTHUMG00000020743.3	COQ4	HGNC:19693
ENSG00000171097.14	335.299	-1.10042	0.150924	2.01813e-14	2.23486e-12	OTTHUMG00000020767.7	KYAT1	HGNC:1564
ENSG00000100299.18	530.21	-0.760118	0.103758	2.17528e-14	2.39438e-12	OTTHUMG00000150180.4	ARSA	HGNC:713
ENSG00000235194.9	727.54	-0.712161	0.0972517	2.32612e-14	2.54508e-12	OTTHUMG00000172116.4	PPP1R3E	HGNC:14943
ENSG00000140398.14	724.137	-0.765114	0.104729	2.39721e-14	2.60725e-12	OTTHUMG00000142821.5	NEIL1	HGNC:18448
ENSG00000160408.14	1208.07	-0.831706	0.114228	2.54189e-14	2.74825e-12	OTTHUMG00000020718.4	ST6GALNAC6	HGNC:23364
ENSG00000183864.5	1441.11	0.632222	0.0865167	2.91283e-14	3.13078e-12	OTTHUMG00000150970.4	TOB2	HGNC:11980
ENSG00000104267.10	7630.65	-0.724351	0.0994252	3.00308e-14	3.20891e-12	OTTHUMG00000164944.3	CA2	HGNC:1373
ENSG00000126882.13	151.504	-1.46401	0.203102	3.18017e-14	3.35885e-12	OTTHUMG00000020821.3	FAM78A	HGNC:25465
ENSG00000136878.13	831.998	-0.675478	0.092701	3.1661e-14	3.35885e-12	OTTHUMG00000020793.4	USP20	HGNC:12619
ENSG00000177706.9	295.374	1.10649	0.15295	3.25044e-14	3.41334e-12	OTTHUMG00000151401.5	FAM20C	HGNC:22140
ENSG00000106052.13	4537.73	0.811722	0.112224	3.30031e-14	3.4459e-12	OTTHUMG00000023377.9	TAX1BP1	HGNC:11575
ENSG00000021826.17	1134.02	-0.757437	0.104362	3.49062e-14	3.62389e-12	OTTHUMG00000132994.16	CPS1	HGNC:2323
ENSG00000125484.12	1774.15	-0.746624	0.103167	3.90806e-14	4.03435e-12	OTTHUMG00000020842.4	GTF3C4	HGNC:4667
ENSG00000152217.19	181.376	1.35536	0.189116	4.81922e-14	4.94701e-12	OTTHUMG00000132613.9	SETBP1	HGNC:15573
ENSG00000155660.11	10046.7	0.711964	0.0985981	5.0028e-14	5.10677e-12	OTTHUMG00000150248.4	PDIA4	HGNC:30167
ENSG00000183597.16	579.969	0.794264	0.110263	5.12053e-14	5.19791e-12	OTTHUMG00000150510.26	TANGO2	HGNC:25439
ENSG00000100426.7	1466.46	-0.736593	0.10182	5.27684e-14	5.32698e-12	OTTHUMG00000150291.3	ZBED4	HGNC:20721
ENSG00000160781.17	254.94	-1.13389	0.158665	5.64047e-14	5.66279e-12	OTTHUMG00000017490.7	PAQR6	HGNC:30132
ENSG00000185608.8	1621.17	1.04111	0.145508	5.99557e-14	5.9864e-12	OTTHUMG00000150136.3	MRPL40	HGNC:14491
ENSG00000177239.15	1488.52	-0.760563	0.106084	6.64858e-14	6.60233e-12	OTTHUMG00000020978.7	MAN1B1	HGNC:6823
ENSG00000075240.17	505.939	-0.784628	0.109479	6.69965e-14	6.61709e-12	OTTHUMG00000150402.4	GRAMD4	HGNC:29113
ENSG00000175745.14	1847.31	0.671436	0.0935106	7.5162e-14	7.34417e-12	OTTHUMG00000119079.5	NR2F1	HGNC:7975
ENSG00000008300.17	646.283	-1.01986	0.143595	8.17489e-14	7.9453e-12	OTTHUMG00000133544.3	CELSR3	HGNC:3230
ENSG00000215012.9	1474.66	0.589328	0.0820241	8.41397e-14	8.1344e-12	OTTHUMG00000030314.6	RTL10	HGNC:26112
ENSG00000214021.16	1573.54	-0.699586	0.0978978	9.09575e-14	8.70144e-12	OTTHUMG00000128439.14	TTLL3	HGNC:24483
ENSG00000007264.15	830.537	-1.03287	0.146211	1.09142e-13	1.03328e-11	OTTHUMG00000180916.6	MATK	HGNC:6906
ENSG00000183741.12	4479.98	0.627859	0.088205	1.2426e-13	1.17035e-11	OTTHUMG00000150456.3	CBX6	HGNC:1556
ENSG00000100219.16	5109.62	0.986375	0.139951	1.33029e-13	1.24651e-11	OTTHUMG00000151094.3	XBP1	HGNC:12801
ENSG00000136238.18	7084.12	0.659662	0.0930266	1.47021e-13	1.3706e-11	OTTHUMG00000023540.5	RAC1	HGNC:9801
ENSG00000128408.9	90.2156	-9.73896	2.88053	1.49357e-13	1.3853e-11	OTTHUMG00000151332.4	RIBC2	HGNC:13241
ENSG00000136158.12	434.744	1.02707	0.146621	1.69045e-13	1.56e-11	OTTHUMG00000017140.3	SPRY2	HGNC:11270
ENSG00000140044.13	484.336	1.05112	0.150332	1.8963e-13	1.72385e-11	OTTHUMG00000171869.4	JDP2	HGNC:17546
ENSG00000176248.9	1365.97	-0.62074	0.0880424	2.03656e-13	1.84218e-11	OTTHUMG00000020983.3	ANAPC2	HGNC:19989
ENSG00000136153.20	1569.79	0.726646	0.103791	2.52837e-13	2.27579e-11	OTTHUMG00000017093.20	LMO7	HGNC:6646
ENSG00000172340.14	1637.07	-0.638463	0.0913954	3.11548e-13	2.79049e-11	OTTHUMG00000158740.1	SUCLG2	HGNC:11450
ENSG00000205593.12	118.254	-1.39853	0.202872	3.28805e-13	2.9307e-11	OTTHUMG00000150210.7	DENND6B	HGNC:32690
ENSG00000100034.14	3388.88	0.661607	0.0949643	3.44209e-13	3.0531e-11	OTTHUMG00000150835.13	PPM1F	HGNC:19388
ENSG00000138867.16	3106.6	0.684331	0.0986476	4.14052e-13	3.65486e-11	OTTHUMG00000150728.3	GUCD1	HGNC:14237
ENSG00000021645.19	446.422	0.9475	0.137654	4.2373e-13	3.7223e-11	OTTHUMG00000171502.7	NRXN3	HGNC:8010
ENSG00000189060.5	7488.21	1.03949	0.151766	4.95524e-13	4.33216e-11	OTTHUMG00000150659.1	H1-0	HGNC:4714
ENSG00000100401.19	7460.69	0.706272	0.10276	5.05142e-13	4.39522e-11	OTTHUMG00000150940.12	RANGAP1	HGNC:9854
ENSG00000145623.13	47.6288	-3.50437	0.500661	5.08293e-13	4.40167e-11	OTTHUMG00000090811.3	OSMR	HGNC:8507
ENSG00000119401.10	553.255	-0.710586	0.103198	5.26959e-13	4.54179e-11	OTTHUMG00000021026.4	TRIM32	HGNC:16380
ENSG00000237517.9	373.354	-1.16439	0.170651	5.82547e-13	4.99732e-11	OTTHUMG00000191820.1	DGCR5	HGNC:16757
ENSG00000148303.17	29693.8	-0.971446	0.142657	6.74097e-13	5.75565e-11	OTTHUMG00000020864.3	RPL7A	HGNC:10364
ENSG00000235954.7	688.633	0.664454	0.0967585	6.79397e-13	5.77392e-11	OTTHUMG00000150973.6	TTC28-AS1	HGNC:29336
ENSG00000160293.17	1016.94	-0.847411	0.124407	7.45833e-13	6.3092e-11	OTTHUMG00000020882.2	VAV2	HGNC:12658
ENSG00000185567.7	709.141	-1.13866	0.167976	7.62184e-13	6.4178e-11	OTTHUMG00000170765.2	AHNAK2	HGNC:20125
ENSG00000160445.11	1226.99	-0.605444	0.088516	9.31735e-13	7.74511e-11	OTTHUMG00000020759.3	ZER1	HGNC:30960
ENSG00000148341.17	1626.61	-0.651645	0.0955246	9.6519e-13	7.98007e-11	OTTHUMG00000020769.8	SH3GLB2	HGNC:10834
ENSG00000134138.20	807.343	0.712388	0.104779	1.0007e-12	8.23635e-11	OTTHUMG00000129781.7	MEIS2	HGNC:7001
ENSG00000101115.13	53.4555	-2.20795	0.327503	1.05424e-12	8.63811e-11	OTTHUMG00000032752.6	SALL4	HGNC:15924
ENSG00000095321.17	1055.14	-0.851025	0.126503	1.34802e-12	1.0996e-10	OTTHUMG00000147343.6	CRAT	HGNC:2342
ENSG00000141682.11	3846.75	0.975599	0.145436	1.39565e-12	1.13339e-10	OTTHUMG00000132765.2	PMAIP1	HGNC:9108
ENSG00000102554.14	680.563	0.932304	0.138937	1.41721e-12	1.14581e-10	OTTHUMG00000017074.3	KLF5	HGNC:6349
ENSG00000128245.15	4711.13	0.684368	0.101313	1.45176e-12	1.16857e-10	OTTHUMG00000030833.10	YWHAH	HGNC:12853
ENSG00000043039.7	557.226	0.996103	0.14865	1.52799e-12	1.2206e-10	OTTHUMG00000165776.5	BARX2	HGNC:956
ENSG00000100029.18	7171.09	0.633932	0.0937679	1.55875e-12	1.22572e-10	OTTHUMG00000151077.6	PES1	HGNC:8848
ENSG00000116133.13	6318.79	0.639757	0.0946031	1.56301e-12	1.22572e-10	OTTHUMG00000009989.17	DHCR24	HGNC:2859
ENSG00000119139.20	2040.8	0.621908	0.0924364	1.97104e-12	1.52605e-10	OTTHUMG00000019978.17	TJP2	HGNC:11828
ENSG00000125485.17	701.585	-0.695102	0.103764	2.07042e-12	1.59623e-10	OTTHUMG00000020843.3	DDX31	HGNC:16715
ENSG00000178695.6	5499.06	0.890436	0.133859	2.13013e-12	1.63536e-10	OTTHUMG00000017096.4	KCTD12	HGNC:14678
ENSG00000111344.11	62.4765	-1.92015	0.290097	2.14489e-12	1.63981e-10	OTTHUMG00000169705.2	RASAL1	HGNC:9873
ENSG00000198796.7	78.2089	2.79389	0.422198	2.18779e-12	1.66564e-10	OTTHUMG00000132755.3	ALPK2	HGNC:20565
ENSG00000163975.12	553.913	-0.84825	0.127513	2.26855e-12	1.71995e-10	OTTHUMG00000155518.3	MELTF	HGNC:7037
ENSG00000129159.7	394.462	-0.948532	0.142992	2.29973e-12	1.73639e-10	OTTHUMG00000166359.2	KCNC1	HGNC:6233
ENSG00000165102.15	1307.59	-0.592105	0.0882751	2.4861e-12	1.86172e-10	OTTHUMG00000164102.3	HGSNAT	HGNC:26527
ENSG00000169432.17	77.8105	1.777	0.26958	2.59744e-12	1.93716e-10	OTTHUMG00000154044.8	SCN9A	HGNC:10597
ENSG00000100263.14	923.975	0.730237	0.109903	2.85923e-12	2.12373e-10	OTTHUMG00000151032.4	RHBDD3	HGNC:1308
ENSG00000230699.2	313.187	-1.14517	0.174273	3.06281e-12	2.26574e-10	OTTHUMG00000040716.1	AL645608.2
ENSG00000168743.12	312.066	-0.862699	0.130856	3.37823e-12	2.48899e-10	OTTHUMG00000161189.3	NPNT	HGNC:27405
ENSG00000100243.21	7981.21	0.695946	0.105164	3.61649e-12	2.65384e-10	OTTHUMG00000150745.7	CYB5R3	HGNC:2873
ENSG00000170638.9	2686.93	-0.711182	0.108027	4.38996e-12	3.20853e-10	OTTHUMG00000044644.3	TRABD	HGNC:28805
ENSG00000105376.5	427.513	-0.987204	0.151163	4.42798e-12	3.22343e-10	OTTHUMG00000180406.4	ICAM5	HGNC:5348
ENSG00000119333.11	1801.75	-0.611878	0.0926047	4.45959e-12	3.23356e-10	OTTHUMG00000020750.2	WDR34	HGNC:28296
ENSG00000225339.4	1430.12	-0.87437	0.133732	4.50451e-12	3.25322e-10	OTTHUMG00000014542.5	AL354740.1
ENSG00000272779.1	152.699	1.13486	0.174909	5.25484e-12	3.76535e-10	OTTHUMG00000151046.4	AC245060.4
ENSG00000188747.8	58.9266	-1.73111	0.266986	5.8665e-12	4.18721e-10	OTTHUMG00000131781.1	NOXA1	HGNC:10668
ENSG00000185651.14	5040.39	0.812126	0.124943	6.73644e-12	4.78943e-10	OTTHUMG00000150823.2	UBE2L3	HGNC:12488
ENSG00000138111.14	545.4	-0.684656	0.105089	7.29099e-12	5.1636e-10	OTTHUMG00000018961.3	MFSD13A	HGNC:26196
ENSG00000197070.14	608.404	-0.775695	0.119488	7.33489e-12	5.17464e-10	OTTHUMG00000020993.5	ARRDC1	HGNC:28633
ENSG00000178878.12	172.96	1.0825	0.167915	7.55809e-12	5.31159e-10	OTTHUMG00000153561.2	APOLD1	HGNC:25268
ENSG00000145147.20	11128.3	1.03791	0.161096	7.72807e-12	5.41024e-10	OTTHUMG00000128551.5	SLIT2	HGNC:11086
ENSG00000198797.7	24.2566	4.69217	0.697818	8.48196e-12	5.89286e-10	OTTHUMG00000034953.3	BRINP2	HGNC:13746
ENSG00000278041.1	1302.85	-0.953486	0.14832	8.9221e-12	6.15187e-10	OTTHUMG00000186718.1	AL133325.3
ENSG00000100028.12	6157.45	0.859306	0.133654	1.00863e-11	6.90252e-10	OTTHUMG00000150727.3	SNRPD3	HGNC:11160
ENSG00000179218.13	18849.5	0.705308	0.107971	1.03225e-11	7.01163e-10	OTTHUMG00000180574.2	CALR	HGNC:1455
ENSG00000198355.5	1533.77	-0.7154	0.111116	1.13269e-11	7.63711e-10	OTTHUMG00000150290.2	PIM3	HGNC:19310
ENSG00000167112.10	1230.75	-0.689076	0.106778	1.15511e-11	7.75965e-10	OTTHUMG00000020741.3	TRUB2	HGNC:17170
ENSG00000115361.8	109.956	-1.44795	0.228159	1.27634e-11	8.54258e-10	OTTHUMG00000132989.4	ACADL	HGNC:88
ENSG00000100867.14	314.718	1.20614	0.190242	1.3789e-11	9.16189e-10	OTTHUMG00000028771.5	DHRS2	HGNC:18349
ENSG00000251322.9	751.174	-0.822281	0.128776	1.37833e-11	9.16189e-10	OTTHUMG00000150169.4	SHANK3	HGNC:14294
ENSG00000172115.9	3532.08	0.712014	0.111134	1.4791e-11	9.79205e-10	OTTHUMG00000128495.4	CYCS	HGNC:19986
ENSG00000163512.14	902.312	-0.602004	0.0936821	1.5961e-11	1.05285e-09	OTTHUMG00000130573.10	AZI2	HGNC:24002
ENSG00000285283.1	158.513	6.40316	0.993587	1.64233e-11	1.07558e-09	OTTHUMG00000192409.1	AL035078.4
ENSG00000100077.15	1278	0.636033	0.0996031	1.99978e-11	1.30036e-09	OTTHUMG00000150280.6	GRK3	HGNC:290
ENSG00000139370.12	557.952	0.604977	0.0947791	2.05968e-11	1.33456e-09	OTTHUMG00000168415.4	SLC15A4	HGNC:23090
ENSG00000075223.14	195.847	1.58742	0.253807	2.12771e-11	1.37377e-09	OTTHUMG00000023447.6	SEMA3C	HGNC:10725
ENSG00000197576.14	398.029	1.19471	0.190701	2.23748e-11	1.43955e-09	OTTHUMG00000023213.8	HOXA4	HGNC:5105
ENSG00000178568.15	32.7152	-3.19117	0.501702	2.34948e-11	1.50104e-09	OTTHUMG00000133012.6	ERBB4	HGNC:3432
ENSG00000106771.13	1124.42	-0.677753	0.107013	2.38726e-11	1.51986e-09	OTTHUMG00000020469.4	TMEM245	HGNC:1363
ENSG00000125266.8	1113.05	0.644861	0.101985	2.81324e-11	1.78485e-09	OTTHUMG00000017324.6	EFNB2	HGNC:3227
ENSG00000144596.13	155.979	-1.31189	0.211621	3.35559e-11	2.11425e-09	OTTHUMG00000155544.7	GRIP2	HGNC:23841
ENSG00000104133.15	1473.31	-0.585284	0.0933532	3.60028e-11	2.26063e-09	OTTHUMG00000131199.5	SPG11	HGNC:11226
ENSG00000144395.18	1107.65	-0.699933	0.111888	3.66483e-11	2.29328e-09	OTTHUMG00000154475.6	CCDC150	HGNC:26834
ENSG00000183098.11	950.053	0.852923	0.137357	3.82195e-11	2.38344e-09	OTTHUMG00000017205.5	GPC6	HGNC:4454
ENSG00000158270.12	1104.58	0.675063	0.108129	4.23325e-11	2.62203e-09	OTTHUMG00000178145.3	COLEC12	HGNC:16016
ENSG00000108830.10	741.935	0.793652	0.127677	4.26521e-11	2.6329e-09	OTTHUMG00000180817.4	RND2	HGNC:18315
ENSG00000228526.7	301.449	-0.866301	0.140151	4.83411e-11	2.96405e-09	OTTHUMG00000001762.6	MIR34AHG	HGNC:51913
ENSG00000107263.18	2162.63	-0.644345	0.103531	5.01838e-11	3.06675e-09	OTTHUMG00000020829.5	RAPGEF1	HGNC:4568
ENSG00000093010.14	2321.38	0.595713	0.0953807	5.34925e-11	3.25805e-09	OTTHUMG00000150529.9	COMT	HGNC:2228
ENSG00000073169.14	678.459	-0.958265	0.155803	5.44315e-11	3.30423e-09	OTTHUMG00000044645.4	SELENOO	HGNC:30395
ENSG00000136295.15	3505.11	0.781495	0.126282	5.82077e-11	3.52176e-09	OTTHUMG00000152050.4	TTYH3	HGNC:22222
ENSG00000123407.4	88.4078	1.25262	0.205097	5.85945e-11	3.53346e-09	OTTHUMG00000160010.3	HOXC12	HGNC:5124
ENSG00000004139.14	1031.23	-0.625625	0.101031	6.29195e-11	3.75708e-09	OTTHUMG00000132499.47	SARM1	HGNC:17074
ENSG00000139737.22	1168.63	0.733864	0.118974	6.27183e-11	3.75708e-09	OTTHUMG00000017110.12	SLAIN1	HGNC:26387
ENSG00000265107.3	27.3347	2.57489	0.420482	6.61854e-11	3.92643e-09	OTTHUMG00000014020.6	GJA5	HGNC:4279
ENSG00000186654.21	426.58	-0.863604	0.141002	7.08424e-11	4.17559e-09	OTTHUMG00000150460.6	PRR5	HGNC:31682
ENSG00000170396.8	318.305	-1.08035	0.177664	7.5059e-11	4.4099e-09	OTTHUMG00000132625.2	ZNF804A	HGNC:21711
ENSG00000113763.12	113.707	-1.14784	0.188821	7.6717e-11	4.49286e-09	OTTHUMG00000163225.4	UNC5A	HGNC:12567
ENSG00000177283.7	747.861	0.617161	0.0998956	8.10239e-11	4.72993e-09	OTTHUMG00000017956.2	FZD8	HGNC:4046
ENSG00000150347.16	727.101	0.709425	0.115709	8.27574e-11	4.81574e-09	OTTHUMG00000018298.3	ARID5B	HGNC:17362
ENSG00000061918.13	677.482	0.687675	0.112184	8.79432e-11	5.08131e-09	OTTHUMG00000161698.19	GUCY1B1	HGNC:4687
ENSG00000148600.15	447.84	-0.738707	0.121013	8.81553e-11	5.08131e-09	OTTHUMG00000018634.3	CDHR1	HGNC:14550
ENSG00000176978.14	229.27	-1.09729	0.181624	9.97285e-11	5.6945e-09	OTTHUMG00000020977.4	DPP7	HGNC:14892
ENSG00000177169.10	1762.51	0.621187	0.101665	1.13661e-10	6.44976e-09	OTTHUMG00000168052.6	ULK1	HGNC:12558
ENSG00000198719.9	537.782	-0.699057	0.115353	1.29014e-10	7.25338e-09	OTTHUMG00000016078.4	DLL1	HGNC:2908
ENSG00000130311.11	1576.5	0.721449	0.118931	1.33583e-10	7.44155e-09	OTTHUMG00000182765.2	DDA1	HGNC:28360
ENSG00000175084.12	29.9737	2.26325	0.377781	1.33198e-10	7.44155e-09	OTTHUMG00000058924.4	DES	HGNC:2770
ENSG00000167619.13	225.767	-1.0537	0.175911	1.36532e-10	7.58271e-09	OTTHUMG00000177694.5	TMEM145	HGNC:26912
ENSG00000148356.13	574.83	-0.734782	0.121668	1.37575e-10	7.61747e-09	OTTHUMG00000020701.2	LRSAM1	HGNC:25135
ENSG00000129667.12	549.066	-0.712011	0.117872	1.463e-10	8.07609e-09	OTTHUMG00000180180.3	RHBDF2	HGNC:20788
ENSG00000129993.15	138.65	-1.18952	0.199355	1.51457e-10	8.28567e-09	OTTHUMG00000137864.10	CBFA2T3	HGNC:1537
ENSG00000102878.16	177.221	-0.925092	0.154309	1.54692e-10	8.41661e-09	OTTHUMG00000178325.2	HSF4	HGNC:5227
ENSG00000153790.12	404.517	0.747455	0.124219	1.60294e-10	8.69108e-09	OTTHUMG00000128497.4	C7orf31	HGNC:21722
ENSG00000088836.14	473.119	-0.86527	0.144547	1.66029e-10	8.97537e-09	OTTHUMG00000031740.8	SLC4A11	HGNC:16438
ENSG00000099956.19	6836.08	0.618054	0.102491	1.7101e-10	9.21737e-09	OTTHUMG00000150737.11	SMARCB1	HGNC:11103
ENSG00000272983.1	87.3135	-1.52156	0.256347	1.71913e-10	9.23879e-09	OTTHUMG00000186215.1	AL117339.4
ENSG00000182095.14	3154.52	0.678274	0.112995	1.90351e-10	1.01402e-08	OTTHUMG00000151831.8	TNRC18	HGNC:11962
ENSG00000147041.12	427.082	0.776967	0.130053	1.98428e-10	1.05092e-08	OTTHUMG00000033176.2	SYTL5	HGNC:15589
ENSG00000187730.9	89.1306	-1.28421	0.216944	2.03743e-10	1.07595e-08	OTTHUMG00000041064.6	GABRD	HGNC:4084
ENSG00000103241.7	443.456	0.701313	0.117234	2.08485e-10	1.09782e-08	OTTHUMG00000137651.5	FOXF1	HGNC:3809
ENSG00000204682.8	343.681	0.740298	0.123984	2.12552e-10	1.11602e-08	OTTHUMG00000017795.3	MIR1915HG	HGNC:31448
ENSG00000172889.16	748.378	-0.889124	0.15029	2.41441e-10	1.25687e-08	OTTHUMG00000020938.6	EGFL7	HGNC:20594
ENSG00000184916.9	1810.67	-0.637427	0.106817	2.56012e-10	1.32517e-08	OTTHUMG00000140172.3	JAG2	HGNC:6189
ENSG00000088340.16	166.469	-1.26721	0.216305	2.73367e-10	1.40703e-08	OTTHUMG00000032354.12	FER1L4	HGNC:15801
ENSG00000169231.13	402.322	-0.83782	0.141971	2.81253e-10	1.44356e-08	OTTHUMG00000035710.4	THBS3	HGNC:11787
ENSG00000137267.6	1511.2	0.629867	0.105771	2.93833e-10	1.5039e-08	OTTHUMG00000014135.2	TUBB2A	HGNC:12412
ENSG00000087245.13	698.427	0.861529	0.146422	3.06325e-10	1.55982e-08	OTTHUMG00000133202.6	MMP2	HGNC:7166
ENSG00000178035.12	13663	-0.600549	0.100377	3.12552e-10	1.58637e-08	OTTHUMG00000156771.3	IMPDH2	HGNC:6053
ENSG00000088881.20	517.49	-0.84318	0.142712	3.19636e-10	1.61784e-08	OTTHUMG00000031709.7	EBF4	HGNC:29278
ENSG00000158748.4	256.216	-0.823373	0.140064	3.35274e-10	1.683e-08	OTTHUMG00000002713.2	HTR6	HGNC:5301
ENSG00000115828.17	286.038	0.834204	0.142209	3.38446e-10	1.68964e-08	OTTHUMG00000100963.5	QPCT	HGNC:9753
ENSG00000226416.1	57.2959	-1.59809	0.274091	3.38061e-10	1.68964e-08	OTTHUMG00000012474.2	MRPL23-AS1	HGNC:42812
ENSG00000139292.13	252.807	0.897835	0.153188	3.47642e-10	1.73082e-08	OTTHUMG00000169543.2	LGR5	HGNC:4504
ENSG00000114735.9	1042.46	-0.594232	0.100458	3.69339e-10	1.83385e-08	OTTHUMG00000156849.2	HEMK1	HGNC:24923
ENSG00000166762.18	180.827	-0.953363	0.163546	3.93611e-10	1.9438e-08	OTTHUMG00000059902.13	CATSPER2	HGNC:18810
ENSG00000254369.6	256.401	1.30167	0.224872	4.04831e-10	1.99382e-08	OTTHUMG00000158092.4	HOXA-AS3	HGNC:43748
ENSG00000198832.10	626.103	0.837558	0.143293	4.16013e-10	2.04339e-08	OTTHUMG00000151207.1	SELENOM	HGNC:30397
ENSG00000154734.15	9178.17	0.969247	0.166097	4.30372e-10	2.10261e-08	OTTHUMG00000078688.5	ADAMTS1	HGNC:217
ENSG00000054598.9	4795.47	0.637201	0.108791	4.63468e-10	2.25826e-08	OTTHUMG00000016182.3	FOXC1	HGNC:3800
ENSG00000145335.16	616.176	0.623511	0.106156	4.7624e-10	2.31433e-08	OTTHUMG00000130948.7	SNCA	HGNC:11138
ENSG00000115902.11	1115.72	0.998521	0.1732	5.32263e-10	2.57289e-08	OTTHUMG00000129537.4	SLC1A4	HGNC:10942
ENSG00000237423.3	20.655	2.73359	0.47393	6.29417e-10	3.0265e-08	OTTHUMG00000032678.5	LINC01522	HGNC:51224
ENSG00000169981.11	132.627	-1.25245	0.219175	6.35467e-10	3.03959e-08	OTTHUMG00000133091.13	ZNF35	HGNC:13099
ENSG00000258986.7	374.513	-0.6897	0.119209	6.96102e-10	3.31229e-08	OTTHUMG00000170829.4	TMEM179	HGNC:20137
ENSG00000100316.16	59932.4	-0.66469	0.114916	7.30885e-10	3.46876e-08	OTTHUMG00000151079.10	RPL3	HGNC:10332
ENSG00000078018.20	65.998	1.54797	0.27389	1.00445e-09	4.6921e-08	OTTHUMG00000132962.7	MAP2	HGNC:6839
ENSG00000136816.16	600.245	-0.612398	0.106403	1.00662e-09	4.6921e-08	OTTHUMG00000020795.2	TOR1B	HGNC:11995
ENSG00000214279.13	220.171	-1.3694	0.243685	9.97542e-10	4.6921e-08	OTTHUMG00000019326.5	SCART1	HGNC:32411
ENSG00000261971.8	723.234	-0.622428	0.108306	1.00399e-09	4.6921e-08	OTTHUMG00000177474.4	MMP25-AS1	HGNC:51372
ENSG00000164068.16	1570.71	-0.630921	0.10991	1.01961e-09	4.74054e-08	OTTHUMG00000156891.7	RNF123	HGNC:21148
ENSG00000185565.12	95.7592	1.3335	0.236795	1.10616e-09	5.12988e-08	OTTHUMG00000159308.7	LSAMP	HGNC:6705
ENSG00000183762.12	1807.93	0.793433	0.140006	1.1883e-09	5.48299e-08	OTTHUMG00000030987.4	KREMEN1	HGNC:17550
ENSG00000287356.1	89.5056	-1.28642	0.228809	1.19375e-09	5.49427e-08	OTTHUMG00000193849.2	AL590822.3
ENSG00000261188.1	724.3	0.684451	0.12027	1.22769e-09	5.63626e-08	OTTHUMG00000172738.1	Z95115.1
ENSG00000134954.14	237.407	0.950083	0.168942	1.30659e-09	5.98345e-08	OTTHUMG00000165799.4	ETS1	HGNC:3488
ENSG00000100319.13	518.803	0.717882	0.126535	1.3152e-09	6.00784e-08	OTTHUMG00000151292.2	ZMAT5	HGNC:28046
ENSG00000114841.17	373.047	-1.07747	0.192423	1.34568e-09	6.11648e-08	OTTHUMG00000158378.3	DNAH1	HGNC:2940
ENSG00000103647.13	92.569	1.19676	0.213584	1.36607e-09	6.19378e-08	OTTHUMG00000133288.6	CORO2B	HGNC:2256
ENSG00000196126.11	191.803	0.926381	0.164652	1.37393e-09	6.21399e-08	OTTHUMG00000031196.4	HLA-DRB1	HGNC:4948
ENSG00000180815.14	320.852	-0.726214	0.128707	1.5387e-09	6.89097e-08	OTTHUMG00000022724.5	MAP3K15	HGNC:31689
ENSG00000168672.4	3456.95	-0.667619	0.117933	1.60511e-09	7.15333e-08	OTTHUMG00000165034.3	LRATD2	HGNC:24166
ENSG00000091986.15	348.024	0.956515	0.171862	1.68958e-09	7.51146e-08	OTTHUMG00000159265.4	CCDC80	HGNC:30649
ENSG00000186469.8	280.67	0.780822	0.139601	1.89642e-09	8.39018e-08	OTTHUMG00000171083.3	GNG2	HGNC:4404
ENSG00000148158.17	888.315	-0.737846	0.132031	1.99598e-09	8.80931e-08	OTTHUMG00000020512.3	SNX30	HGNC:23685
ENSG00000120451.10	118.033	-1.24268	0.224977	2.01616e-09	8.83436e-08	OTTHUMG00000165663.1	SNX19	HGNC:21532
ENSG00000157152.17	281.039	-0.79468	0.143035	2.29031e-09	9.89327e-08	OTTHUMG00000155335.10	SYN2	HGNC:11495
ENSG00000101639.18	983.561	-0.750942	0.135268	2.40573e-09	1.03673e-07	OTTHUMG00000160693.4	CEP192	HGNC:25515
ENSG00000119431.9	296.755	-0.879185	0.159058	2.50749e-09	1.07299e-07	OTTHUMG00000020524.1	HDHD3	HGNC:28171
ENSG00000100979.15	605.385	-0.623035	0.111793	2.74059e-09	1.17e-07	OTTHUMG00000033047.5	PLTP	HGNC:9093
ENSG00000139372.15	2156.97	0.605823	0.108448	2.80885e-09	1.19357e-07	OTTHUMG00000168418.4	TDG	HGNC:11700
ENSG00000118946.12	170.835	0.879675	0.15995	2.88286e-09	1.21991e-07	OTTHUMG00000016992.7	PCDH17	HGNC:14267
ENSG00000146090.16	90.5166	-1.29842	0.237774	2.93242e-09	1.23459e-07	OTTHUMG00000130914.8	RASGEF1C	HGNC:27400
ENSG00000119397.16	1458.42	-0.647008	0.117013	3.25709e-09	1.35566e-07	OTTHUMG00000020581.7	CNTRL	HGNC:1858
ENSG00000157064.11	354.935	0.634467	0.114455	3.26571e-09	1.35616e-07	OTTHUMG00000035519.3	NMNAT2	HGNC:16789
ENSG00000224420.3	88.2603	-1.45388	0.268522	3.46112e-09	1.43405e-07	OTTHUMG00000183240.1	ADM5	HGNC:27293
ENSG00000163322.14	409.4	-0.807393	0.14786	3.51112e-09	1.45147e-07	OTTHUMG00000130429.18	ABRAXAS1	HGNC:25829
ENSG00000229847.9	456.053	-0.869539	0.15941	3.53157e-09	1.45663e-07	OTTHUMG00000019125.8	EMX2OS	HGNC:18511
ENSG00000070159.14	922.895	-0.59504	0.107537	3.63836e-09	1.4973e-07	OTTHUMG00000020475.5	PTPN3	HGNC:9655
ENSG00000164116.16	288.629	0.861105	0.158079	3.92681e-09	1.60158e-07	OTTHUMG00000161700.3	GUCY1A1	HGNC:4685
ENSG00000198040.10	664.091	-0.645358	0.117314	3.96057e-09	1.61175e-07	OTTHUMG00000167939.6	ZNF84	HGNC:13159
ENSG00000115339.14	36.1839	-3.10547	0.55846	4.0062e-09	1.62669e-07	OTTHUMG00000132157.12	GALNT3	HGNC:4125
ENSG00000187867.10	199.748	1.0966	0.203253	4.24724e-09	1.71694e-07	OTTHUMG00000181991.5	PALM3	HGNC:33274
ENSG00000100379.17	1090.76	0.652128	0.119285	4.83968e-09	1.94353e-07	OTTHUMG00000150532.3	KCTD17	HGNC:25705
ENSG00000041982.16	773.764	-1.25007	0.233825	4.98502e-09	1.99313e-07	OTTHUMG00000021010.7	TNC	HGNC:5318
ENSG00000142619.4	61.4665	1.36889	0.25528	5.061e-09	2.0191e-07	OTTHUMG00000002373.1	PADI3	HGNC:18337
ENSG00000253741.2	75.7741	-1.5928	0.299469	5.65167e-09	2.2304e-07	OTTHUMG00000164731.2	LNCOC1	HGNC:53947
ENSG00000120915.14	504.089	-0.646317	0.118786	5.67265e-09	2.23385e-07	OTTHUMG00000102115.7	EPHX2	HGNC:3402
ENSG00000071967.12	267.478	-0.798869	0.148445	5.93863e-09	2.32855e-07	OTTHUMG00000132260.4	CYBRD1	HGNC:20797
ENSG00000169629.12	841.642	-0.655079	0.120679	6.00016e-09	2.34764e-07	OTTHUMG00000153289.4	RGPD8	HGNC:9849
ENSG00000106025.9	335.259	0.636289	0.117227	6.28364e-09	2.44287e-07	OTTHUMG00000156980.6	TSPAN12	HGNC:21641
ENSG00000133106.14	87.1971	1.18918	0.223632	6.66915e-09	2.57629e-07	OTTHUMG00000016814.4	EPSTI1	HGNC:16465
ENSG00000102755.12	627.543	0.640801	0.118688	7.09586e-09	2.73535e-07	OTTHUMG00000016648.6	FLT1	HGNC:3763
ENSG00000196576.15	3866.93	-0.749157	0.140026	7.36927e-09	2.83412e-07	OTTHUMG00000150219.10	PLXNB2	HGNC:9104
ENSG00000239857.7	1856.45	0.658894	0.122433	7.38312e-09	2.83412e-07	OTTHUMG00000112459.13	GET4	HGNC:21690
ENSG00000100097.12	145.208	1.34979	0.255839	7.44034e-09	2.8501e-07	OTTHUMG00000150661.2	LGALS1	HGNC:6561
ENSG00000106991.13	42.7904	-1.81489	0.344051	7.56083e-09	2.8902e-07	OTTHUMG00000020723.1	ENG	HGNC:3349
ENSG00000027075.15	493.151	0.662545	0.12317	7.57905e-09	2.89112e-07	OTTHUMG00000152341.7	PRKCH	HGNC:9403
ENSG00000110900.15	94.7042	-1.16084	0.219587	7.62528e-09	2.90269e-07	OTTHUMG00000168484.2	TSPAN11	HGNC:30795
ENSG00000163297.17	324.719	0.682326	0.127043	7.70066e-09	2.92529e-07	OTTHUMG00000151982.4	ANTXR2	HGNC:21732
ENSG00000244486.8	1443.99	0.687785	0.128796	8.98433e-09	3.39177e-07	OTTHUMG00000150779.5	SCARF2	HGNC:19869
ENSG00000267508.5	31.603	-7.50326	2.62048	9.35291e-09	3.52364e-07	OTTHUMG00000178848.6	ZNF285	HGNC:13079
ENSG00000234771.3	200.282	-1.08699	0.207499	1.00302e-08	3.75555e-07	OTTHUMG00000020737.2	SLC25A25-AS1	HGNC:27844
ENSG00000100348.10	3172.59	0.662598	0.124372	1.00747e-08	3.76453e-07	OTTHUMG00000150596.4	TXN2	HGNC:17772
ENSG00000184226.15	2574.86	0.714732	0.133934	1.06509e-08	3.96359e-07	OTTHUMG00000017040.6	PCDH9	HGNC:8661
ENSG00000185432.12	354.315	0.81066	0.15406	1.0998e-08	4.08445e-07	OTTHUMG00000169484.5	METTL7A	HGNC:24550
ENSG00000152193.8	2099.37	0.605242	0.113528	1.1108e-08	4.11694e-07	OTTHUMG00000017122.2	OBI1	HGNC:20308
ENSG00000160796.18	1719.93	-0.685995	0.130114	1.17083e-08	4.32188e-07	OTTHUMG00000156497.11	NBEAL2	HGNC:31928
ENSG00000233429.9	569.516	0.637943	0.12016	1.17721e-08	4.3367e-07	OTTHUMG00000158089.4	HOTAIRM1	HGNC:37117
ENSG00000118596.12	44.6697	-1.67836	0.323572	1.28193e-08	4.68468e-07	OTTHUMG00000169923.6	SLC16A7	HGNC:10928
ENSG00000108641.17	1232.85	-0.593317	0.111938	1.28698e-08	4.69374e-07	OTTHUMG00000059586.17	B9D1	HGNC:24123
ENSG00000223572.9	682.498	-0.812663	0.155239	1.30412e-08	4.74679e-07	OTTHUMG00000059898.16	CKMT1A	HGNC:31736
ENSG00000116991.10	1962.12	0.683745	0.129839	1.30758e-08	4.74991e-07	OTTHUMG00000037820.1	SIPA1L2	HGNC:23800
ENSG00000145416.13	114.528	-1.21092	0.234379	1.39267e-08	5.04897e-07	OTTHUMG00000161204.4	MARCHF1	HGNC:26077
ENSG00000189283.10	119.026	-0.95576	0.184113	1.46527e-08	5.28075e-07	OTTHUMG00000158591.4	FHIT	HGNC:3701
ENSG00000122687.19	1557.78	0.644857	0.122429	1.4784e-08	5.3176e-07	OTTHUMG00000023866.8	MRM2	HGNC:16352
ENSG00000271880.1	112.428	1.03198	0.199829	1.62635e-08	5.8154e-07	OTTHUMG00000185463.1	AGAP11	HGNC:29421
ENSG00000128272.14	22561.8	0.659206	0.126158	1.76587e-08	6.26522e-07	OTTHUMG00000151099.2	ATF4	HGNC:786
ENSG00000177374.13	138.82	-1.01817	0.198237	1.77234e-08	6.276e-07	OTTHUMG00000177635.11	HIC1	HGNC:4909
ENSG00000198121.13	250.908	-0.744676	0.14364	1.94512e-08	6.86124e-07	OTTHUMG00000020486.3	LPAR1	HGNC:3166
ENSG00000198720.13	1038.65	-0.604263	0.115658	1.96614e-08	6.92202e-07	OTTHUMG00000132731.8	ANKRD13B	HGNC:26363
ENSG00000111328.7	1446.66	0.604226	0.115703	2.02907e-08	7.11617e-07	OTTHUMG00000168854.5	CDK2AP1	HGNC:14002
ENSG00000064655.19	433.645	0.601963	0.115496	2.12365e-08	7.39112e-07	OTTHUMG00000033041.9	EYA2	HGNC:3520
ENSG00000184967.7	1307.69	0.696038	0.134611	2.20645e-08	7.6647e-07	OTTHUMG00000168260.5	NOC4L	HGNC:28461
ENSG00000106278.12	30.4017	-2.9768	0.575355	2.25273e-08	7.81061e-07	OTTHUMG00000157057.7	PTPRZ1	HGNC:9685
ENSG00000174748.21	21381.2	-0.649666	0.125626	2.34852e-08	8.12729e-07	OTTHUMG00000130485.10	RPL15	HGNC:10306
ENSG00000079337.16	218.145	1.15485	0.227916	2.35707e-08	8.14147e-07	OTTHUMG00000133667.8	RAPGEF3	HGNC:16629
ENSG00000148400.12	798.881	-0.894294	0.175521	2.45804e-08	8.41075e-07	OTTHUMG00000020935.3	NOTCH1	HGNC:7881
ENSG00000187609.16	239.586	-0.806918	0.157784	2.53378e-08	8.62146e-07	OTTHUMG00000156149.4	EXD3	HGNC:26023
ENSG00000161267.12	129.878	-1.05814	0.208738	2.55105e-08	8.66408e-07	OTTHUMG00000155478.14	BDH1	HGNC:1027
ENSG00000010278.14	753.668	0.650244	0.126158	2.6064e-08	8.83564e-07	OTTHUMG00000044400.14	CD9	HGNC:1709
ENSG00000135046.14	214.378	0.775536	0.151947	2.79811e-08	9.41837e-07	OTTHUMG00000020016.3	ANXA1	HGNC:533
ENSG00000134575.13	1088.24	0.587525	0.113936	2.99289e-08	1.00158e-06	OTTHUMG00000166949.9	ACP2	HGNC:123
ENSG00000147883.12	333.899	0.695662	0.136264	3.12953e-08	1.04158e-06	OTTHUMG00000019691.4	CDKN2B	HGNC:1788
ENSG00000079335.20	281.7	0.837536	0.165494	3.19417e-08	1.06116e-06	OTTHUMG00000010987.16	CDC14A	HGNC:1718
ENSG00000154162.15	167.193	-0.953654	0.189513	3.26958e-08	1.08424e-06	OTTHUMG00000090591.5	CDH12	HGNC:1751
ENSG00000111981.5	246.138	1.15851	0.231378	3.2958e-08	1.08898e-06	OTTHUMG00000015810.3	ULBP1	HGNC:14893
ENSG00000020633.18	177.108	-0.854821	0.169065	3.31557e-08	1.09157e-06	OTTHUMG00000003316.1	RUNX3	HGNC:10473
ENSG00000161180.11	75.9772	1.54381	0.309572	3.31142e-08	1.09157e-06	OTTHUMG00000150821.4	CCDC116	HGNC:26688
ENSG00000135638.14	196.498	-0.940552	0.187458	3.60071e-08	1.18119e-06	OTTHUMG00000129778.8	EMX1	HGNC:3340
ENSG00000136828.19	304.966	-0.701997	0.138721	3.80144e-08	1.24036e-06	OTTHUMG00000020696.4	RALGPS1	HGNC:16851
ENSG00000196104.11	133.998	-0.985621	0.197739	4.24013e-08	1.37612e-06	OTTHUMG00000161190.4	SPOCK3	HGNC:13565
ENSG00000064218.5	32.6576	2.09956	0.421577	4.30369e-08	1.39427e-06	OTTHUMG00000019436.4	DMRT3	HGNC:13909
ENSG00000266573.6	14.4276	3.18814	0.636657	4.50727e-08	1.4525e-06	OTTHUMG00000179506.2	AC018697.1
ENSG00000111432.4	250.114	0.896895	0.179963	4.79183e-08	1.53608e-06	OTTHUMG00000168380.3	FZD10	HGNC:4039
ENSG00000103742.12	402.849	-0.775896	0.155575	4.8871e-08	1.56114e-06	OTTHUMG00000133136.5	IGDCC4	HGNC:13770
ENSG00000232931.6	1170.02	-0.850646	0.171146	4.93649e-08	1.57142e-06	OTTHUMG00000155186.10	LINC00342	HGNC:42470
ENSG00000134109.11	788.54	-0.638648	0.126902	4.98568e-08	1.58157e-06	OTTHUMG00000154896.4	EDEM1	HGNC:18967
ENSG00000162576.16	688.706	-0.614152	0.122008	5.27877e-08	1.66587e-06	OTTHUMG00000002973.5	MXRA8	HGNC:7542
ENSG00000138744.16	274.648	-0.68092	0.136135	5.37521e-08	1.68756e-06	OTTHUMG00000160855.10	NAAA	HGNC:736
ENSG00000156298.12	845.293	-0.62952	0.125329	5.3861e-08	1.68808e-06	OTTHUMG00000024090.4	TSPAN7	HGNC:11854
ENSG00000261832.6	107.322	1.66529	0.341908	5.53643e-08	1.73222e-06	OTTHUMG00000175737.3	AC138894.1
ENSG00000103067.14	22.6959	-2.146	0.43931	5.82986e-08	1.8178e-06	OTTHUMG00000137557.9	ESRP2	HGNC:26152
ENSG00000205643.11	354.076	-0.830944	0.16818	6.02216e-08	1.87456e-06	OTTHUMG00000030672.5	CDPF1	HGNC:33710
ENSG00000130723.20	10053.2	-0.737597	0.148938	6.17203e-08	1.91469e-06	OTTHUMG00000020827.6	PRRC2B	HGNC:28121
ENSG00000164161.10	178.007	0.999152	0.203809	6.28714e-08	1.94709e-06	OTTHUMG00000161428.3	HHIP	HGNC:14866
ENSG00000180818.5	731.194	0.626956	0.125559	6.45008e-08	1.98745e-06	OTTHUMG00000160031.3	HOXC10	HGNC:5122
ENSG00000204262.14	588.692	-0.732617	0.148144	6.58443e-08	2.02543e-06	OTTHUMG00000149842.5	COL5A2	HGNC:2210
ENSG00000101938.15	133.537	1.02287	0.210386	7.58634e-08	2.30262e-06	OTTHUMG00000022199.4	CHRDL1	HGNC:29861
ENSG00000123080.12	1450.95	0.645714	0.130533	7.78265e-08	2.35475e-06	OTTHUMG00000008046.4	CDKN2C	HGNC:1789
ENSG00000180592.17	212.287	0.77163	0.157363	7.78746e-08	2.35475e-06	OTTHUMG00000017797.5	SKIDA1	HGNC:32697
ENSG00000273032.2	70.6691	-1.31321	0.272348	7.99487e-08	2.40663e-06	OTTHUMG00000149977.6	DGCR9	HGNC:17227
ENSG00000149575.6	92.4214	-1.36225	0.283594	8.19452e-08	2.45862e-06	OTTHUMG00000048248.4	SCN2B	HGNC:10589
ENSG00000040731.10	10.641	-7.12978	2.59766	8.4027e-08	2.51695e-06	OTTHUMG00000090667.2	CDH10	HGNC:1749
ENSG00000230606.11	537.864	-0.949588	0.19635	8.58266e-08	2.56665e-06	OTTHUMG00000152989.12	AC092683.1
ENSG00000131981.16	33.9492	-1.9216	0.401131	9.20477e-08	2.73924e-06	OTTHUMG00000171030.5	LGALS3	HGNC:6563
ENSG00000165698.16	307.376	-0.685684	0.140159	9.27845e-08	2.75668e-06	OTTHUMG00000020847.2	SPACA9	HGNC:1367
ENSG00000050555.18	486.516	-0.703358	0.144054	9.52962e-08	2.81301e-06	OTTHUMG00000020819.5	LAMC3	HGNC:6494
ENSG00000106804.8	69.5548	-1.29266	0.270249	1.01549e-07	2.98793e-06	OTTHUMG00000020579.4	C5	HGNC:1331
ENSG00000173531.15	369.168	-0.682345	0.140174	1.0755e-07	3.14927e-06	OTTHUMG00000155918.6	MST1	HGNC:7380
ENSG00000211445.12	633.145	0.635711	0.130104	1.08885e-07	3.18329e-06	OTTHUMG00000163693.4	GPX3	HGNC:4555
ENSG00000171130.18	2630.46	0.625797	0.126899	1.09314e-07	3.19071e-06	OTTHUMG00000158094.5	ATP6V0E2	HGNC:21723
ENSG00000113657.13	195.408	-0.741869	0.153152	1.1042e-07	3.20252e-06	OTTHUMG00000163437.4	DPYSL3	HGNC:3015
ENSG00000225828.1	817.079	-0.640361	0.131551	1.1543e-07	3.33724e-06	OTTHUMG00000007587.6	FAM229A	HGNC:44652
ENSG00000132688.11	1005.49	0.646355	0.132858	1.17201e-07	3.38308e-06	OTTHUMG00000034299.3	NES	HGNC:7756
ENSG00000186951.16	421.135	-0.824726	0.171998	1.19931e-07	3.451e-06	OTTHUMG00000150443.7	PPARA	HGNC:9232
ENSG00000143850.16	148.037	1.00017	0.210097	1.2684e-07	3.63833e-06	OTTHUMG00000036057.10	PLEKHA6	HGNC:17053
ENSG00000285897.1	20.6485	7.13958	2.42464	1.2745e-07	3.6501e-06	OTTHUMG00000179077.3	AC004687.2
ENSG00000087258.15	336.549	-0.734202	0.152529	1.31108e-07	3.73729e-06	OTTHUMG00000133241.11	GNAO1	HGNC:4389
ENSG00000128713.14	611.225	0.667414	0.138452	1.32308e-07	3.76562e-06	OTTHUMG00000132510.6	HOXD11	HGNC:5134
ENSG00000119048.8	491.735	0.589636	0.121496	1.41426e-07	4.01717e-06	OTTHUMG00000129120.3	UBE2B	HGNC:12473
ENSG00000171159.5	456.558	-0.724272	0.150969	1.41953e-07	4.02134e-06	OTTHUMG00000020731.2	C9orf16	HGNC:17823
ENSG00000090615.15	2227.91	0.84406	0.177534	1.48401e-07	4.18453e-06	OTTHUMG00000168023.7	GOLGA3	HGNC:4426
ENSG00000164061.5	465.936	-0.980868	0.209193	1.71977e-07	4.7975e-06	OTTHUMG00000133750.2	BSN	HGNC:1117
ENSG00000135333.14	933.571	0.613809	0.127895	1.72581e-07	4.80701e-06	OTTHUMG00000015228.2	EPHA7	HGNC:3390
ENSG00000019505.8	55.5132	1.33947	0.287184	1.74237e-07	4.84576e-06	OTTHUMG00000166504.3	SYT13	HGNC:14962
ENSG00000130675.15	597.238	0.642922	0.134389	1.76102e-07	4.89018e-06	OTTHUMG00000157181.5	MNX1	HGNC:4979
ENSG00000160404.18	623.026	-0.673815	0.141397	1.7915e-07	4.96728e-06	OTTHUMG00000020706.3	TOR2A	HGNC:11996
ENSG00000076344.16	18.4363	-2.88522	0.604606	1.9151e-07	5.27793e-06	OTTHUMG00000064893.7	RGS11	HGNC:9993
ENSG00000162244.12	13889	-0.725175	0.153374	1.94369e-07	5.34867e-06	OTTHUMG00000155262.7	RPL29	HGNC:10331
ENSG00000261011.1	72.3058	1.77183	0.384324	1.9525e-07	5.36483e-06	OTTHUMG00000176765.1	AL136982.4
ENSG00000169964.8	303.709	-0.648156	0.136377	2.00393e-07	5.4814e-06	OTTHUMG00000133092.3	TMEM42	HGNC:28444
ENSG00000178401.16	166.504	0.714485	0.150993	2.01536e-07	5.50444e-06	OTTHUMG00000169487.7	DNAJC22	HGNC:25802
ENSG00000164124.11	212.601	-0.712826	0.151056	2.1124e-07	5.72667e-06	OTTHUMG00000162013.8	TMEM144	HGNC:25633
ENSG00000170231.15	20.9826	2.12248	0.460003	2.14373e-07	5.803e-06	OTTHUMG00000130329.6	FABP6	HGNC:3561
ENSG00000151892.14	334.508	-0.651907	0.137942	2.24578e-07	6.05234e-06	OTTHUMG00000019097.4	GFRA1	HGNC:4243
ENSG00000143344.15	225.729	0.719596	0.152888	2.26306e-07	6.08994e-06	OTTHUMG00000035328.3	RGL1	HGNC:30281
ENSG00000125895.5	291.663	-0.642251	0.135777	2.2988e-07	6.16793e-06	OTTHUMG00000031655.3	TMEM74B	HGNC:15893
ENSG00000131871.15	1083.49	0.590565	0.123967	2.32878e-07	6.23008e-06	OTTHUMG00000166441.6	SELENOS	HGNC:30396
ENSG00000170743.17	52.1742	1.38304	0.299083	2.39669e-07	6.38292e-06	OTTHUMG00000165499.3	SYT9	HGNC:19265
ENSG00000283236.1	22.179	-2.36473	0.50684	2.40338e-07	6.38292e-06	OTTHUMG00000182380.2	AC074141.1
ENSG00000177943.14	104.607	-0.906702	0.195155	2.40687e-07	6.38292e-06	OTTHUMG00000020951.8	MAMDC4	HGNC:24083
ENSG00000092036.18	1061.24	-0.604922	0.128135	2.45908e-07	6.51192e-06	OTTHUMG00000028710.8	HAUS4	HGNC:20163
ENSG00000169851.15	918.364	0.730073	0.155744	2.46449e-07	6.5168e-06	OTTHUMG00000160364.4	PCDH7	HGNC:8659
ENSG00000242071.3	124.179	-1.21369	0.264278	2.47994e-07	6.54818e-06	OTTHUMG00000157981.1	RPL7AP6	HGNC:19785
ENSG00000225614.3	114.362	-0.982928	0.212945	2.55981e-07	6.74932e-06	OTTHUMG00000173151.5	ZNF469	HGNC:23216
ENSG00000184436.12	1665.08	0.632765	0.134152	2.60383e-07	6.83581e-06	OTTHUMG00000150879.2	THAP7	HGNC:23190
ENSG00000256124.6	27.6986	1.89013	0.412274	2.60105e-07	6.83581e-06	OTTHUMG00000168039.8	LINC01152	HGNC:16752
ENSG00000134215.16	219.892	0.823463	0.177595	2.69037e-07	7.05287e-06	OTTHUMG00000010995.5	VAV3	HGNC:12659
ENSG00000170049.9	203.983	0.724313	0.15531	2.70651e-07	7.08501e-06	OTTHUMG00000108170.2	KCNAB3	HGNC:6230
ENSG00000183684.8	6832.13	0.600095	0.128889	2.85041e-07	7.44039e-06	OTTHUMG00000160470.3	ALYREF	HGNC:19071
ENSG00000067842.17	55.4261	-1.768	0.387361	2.86932e-07	7.47907e-06	OTTHUMG00000024202.5	ATP2B3	HGNC:816
ENSG00000196152.10	223.741	-0.696283	0.149772	3.00325e-07	7.7948e-06	OTTHUMG00000020703.1	ZNF79	HGNC:13153
ENSG00000161513.12	959.55	-0.595353	0.126856	3.02722e-07	7.84587e-06	OTTHUMG00000179026.9	FDXR	HGNC:3642
ENSG00000100410.8	1274.08	0.613571	0.13154	3.20502e-07	8.28318e-06	OTTHUMG00000150966.2	PHF5A	HGNC:18000
ENSG00000185065.6	99.9544	0.927937	0.202454	3.26965e-07	8.40768e-06	OTTHUMG00000150135.1	AC000068.1
ENSG00000155849.15	253.647	0.631521	0.135463	3.31317e-07	8.47876e-06	OTTHUMG00000023701.8	ELMO1	HGNC:16286
ENSG00000136895.19	335.207	-0.725879	0.157634	3.48918e-07	8.90422e-06	OTTHUMG00000020700.10	GARNL3	HGNC:25425
ENSG00000099992.15	433.494	0.591568	0.126736	3.51134e-07	8.9483e-06	OTTHUMG00000150924.3	TBC1D10A	HGNC:23609
ENSG00000259820.1	483.788	-0.651132	0.141143	3.9334e-07	9.91326e-06	OTTHUMG00000164324.1	AC083843.3
ENSG00000061337.15	125.9	0.772584	0.168925	3.96618e-07	9.98209e-06	OTTHUMG00000097027.4	LZTS1	HGNC:13861
ENSG00000109323.11	563.817	-0.596634	0.129123	4.18273e-07	1.04982e-05	OTTHUMG00000131123.14	MANBA	HGNC:6831
ENSG00000205403.13	28.2278	2.21	0.495143	4.32601e-07	1.07985e-05	OTTHUMG00000161109.6	CFI	HGNC:5394
ENSG00000259316.11	61.233	-1.7344	0.391722	4.5331e-07	1.12539e-05	OTTHUMG00000172470.9	AC087632.2
ENSG00000196458.11	478.343	-0.861392	0.191071	4.62355e-07	1.14629e-05	OTTHUMG00000167934.4	ZNF605	HGNC:28068
ENSG00000164398.14	190.506	-0.984636	0.220547	5.0916e-07	1.25551e-05	OTTHUMG00000150692.18	ACSL6	HGNC:16496
ENSG00000164129.12	22.3124	-3.16903	0.682591	5.24746e-07	1.28873e-05	OTTHUMG00000161353.3	NPY5R	HGNC:7958
ENSG00000197921.6	38.5583	-2.09126	0.476943	5.35212e-07	1.31091e-05	OTTHUMG00000000793.2	HES5	HGNC:19764
ENSG00000095739.11	432.618	0.64185	0.140535	5.41222e-07	1.32386e-05	OTTHUMG00000017874.3	BAMBI	HGNC:30251
ENSG00000184319.16	515.137	-0.680098	0.150007	5.50618e-07	1.33967e-05	OTTHUMG00000150154.4	RPL23AP82	HGNC:33730
ENSG00000165973.19	31.9813	-1.6753	0.378877	5.6066e-07	1.36099e-05	OTTHUMG00000166042.3	NELL1	HGNC:7750
ENSG00000213904.9	96.7695	-1.04533	0.235577	5.65341e-07	1.36639e-05	OTTHUMG00000182815.4	LIPE-AS1	HGNC:48589
ENSG00000139970.17	241.066	0.659557	0.14558	5.7142e-07	1.37926e-05	OTTHUMG00000028947.5	RTN1	HGNC:10467
ENSG00000130066.16	1705.71	0.621993	0.136756	5.75126e-07	1.38091e-05	OTTHUMG00000021256.1	SAT1	HGNC:10540
ENSG00000128228.5	724.223	0.728707	0.161796	5.93115e-07	1.42037e-05	OTTHUMG00000150820.2	SDF2L1	HGNC:10676
ENSG00000273145.1	57.6608	-1.218	0.276836	6.33163e-07	1.50837e-05	OTTHUMG00000170172.1	BX537318.1
ENSG00000105088.8	271.508	-0.683788	0.152388	6.75978e-07	1.60409e-05	OTTHUMG00000180390.2	OLFM2	HGNC:17189
ENSG00000213888.3	112.331	0.8406	0.189789	7.00106e-07	1.65553e-05	OTTHUMG00000187474.1	LINC01521	HGNC:26029
ENSG00000226562.4	214.864	-0.808009	0.182606	7.41881e-07	1.74631e-05	OTTHUMG00000000405.10	CYP4F26P	HGNC:39948
ENSG00000198435.4	994.308	-0.671999	0.150521	7.6244e-07	1.78607e-05	OTTHUMG00000156150.2	NRARP	HGNC:33843
ENSG00000189221.9	137.397	-0.785199	0.1778	7.77563e-07	1.8122e-05	OTTHUMG00000021387.1	MAOA	HGNC:6833
ENSG00000009950.16	541.957	-0.622555	0.139012	7.90132e-07	1.83447e-05	OTTHUMG00000129995.8	MLXIPL	HGNC:12744
ENSG00000178031.17	30.3137	1.52708	0.352008	7.96963e-07	1.84653e-05	OTTHUMG00000019604.11	ADAMTSL1	HGNC:14632
ENSG00000179673.5	112.619	-1.08125	0.249136	8.1525e-07	1.88322e-05	OTTHUMG00000178187.2	RPRML	HGNC:32422
ENSG00000205913.7	240.015	-0.635223	0.142286	8.27155e-07	1.9059e-05	OTTHUMG00000177357.2	SRRM2-AS1	HGNC:44162
ENSG00000100276.10	42.1152	1.24069	0.286197	8.42808e-07	1.93952e-05	OTTHUMG00000151106.3	RASL10A	HGNC:16954
ENSG00000248527.1	67959.5	0.669587	0.14941	8.52651e-07	1.9597e-05	OTTHUMG00000002335.2	MTATP6P1	HGNC:44575
ENSG00000099365.11	74.0746	-1.06434	0.245203	8.66306e-07	1.98609e-05	OTTHUMG00000132391.5	STX1B	HGNC:18539
ENSG00000187713.7	904.292	-0.588821	0.131551	8.74212e-07	2.0017e-05	OTTHUMG00000020985.3	TMEM203	HGNC:28217
ENSG00000120549.18	384.702	0.601572	0.13465	8.81304e-07	2.01542e-05	OTTHUMG00000017824.8	KIAA1217	HGNC:25428
ENSG00000171448.9	426.825	-0.607513	0.136573	9.32104e-07	2.12627e-05	OTTHUMG00000020627.2	ZBTB26	HGNC:23383
ENSG00000126091.20	420.147	-0.630726	0.142191	9.48035e-07	2.15991e-05	OTTHUMG00000007561.18	ST3GAL3	HGNC:10866
ENSG00000135540.11	1320.22	0.848987	0.194796	9.56563e-07	2.17663e-05	OTTHUMG00000016321.3	NHSL1	HGNC:21021
ENSG00000143630.10	560.681	-0.604311	0.136282	1.00654e-06	2.2875e-05	OTTHUMG00000035872.3	HCN3	HGNC:19183
ENSG00000257524.6	329.11	-0.861703	0.198753	1.03082e-06	2.33687e-05	OTTHUMG00000169436.5	AL157935.3
ENSG00000224086.6	398.98	0.597821	0.134737	1.0333e-06	2.33958e-05	OTTHUMG00000153510.3	AC245452.1
ENSG00000107281.10	1073.19	-0.613626	0.13894	1.05545e-06	2.38382e-05	OTTHUMG00000020956.4	NPDC1	HGNC:7899
ENSG00000196517.12	807.81	0.88981	0.205894	1.06114e-06	2.39372e-05	OTTHUMG00000008294.4	SLC6A9	HGNC:11056
ENSG00000141337.12	217.173	-0.712339	0.162594	1.09557e-06	2.46531e-05	OTTHUMG00000179810.6	ARSG	HGNC:24102
ENSG00000187051.9	1687.15	0.719685	0.164807	1.1028e-06	2.47551e-05	OTTHUMG00000151101.2	RPS19BP1	HGNC:28749
ENSG00000162526.7	140.258	-0.876705	0.20329	1.1174e-06	2.50517e-05	OTTHUMG00000007585.4	TSSK3	HGNC:15473
ENSG00000179743.4	384.565	0.727894	0.165634	1.18323e-06	2.64304e-05	OTTHUMG00000009375.2	AL450998.2
ENSG00000172086.9	372.721	0.850752	0.197427	1.18812e-06	2.64553e-05	OTTHUMG00000130315.3	KRCC1	HGNC:28039
ENSG00000174586.11	194.34	-0.692499	0.158808	1.19987e-06	2.66715e-05	OTTHUMG00000183510.5	ZNF497	HGNC:23714
ENSG00000105559.12	211.54	0.759556	0.175275	1.21214e-06	2.68788e-05	OTTHUMG00000183329.4	PLEKHA4	HGNC:14339
ENSG00000099977.14	2493.34	0.767066	0.177531	1.23584e-06	2.7305e-05	OTTHUMG00000193422.1	DDT	HGNC:2732
ENSG00000188818.12	190.435	-1.18481	0.279662	1.2423e-06	2.73815e-05	OTTHUMG00000090319.5	ZDHHC11	HGNC:19158
ENSG00000281026.1	230.416	-0.898845	0.209708	1.24856e-06	2.74532e-05	OTTHUMG00000189577.1	N4BP2L2-IT2	HGNC:25038
ENSG00000148942.15	32.9068	1.45526	0.342563	1.2773e-06	2.79841e-05	OTTHUMG00000150706.5	SLC5A12	HGNC:28750
ENSG00000159307.19	277.074	0.631342	0.144586	1.31287e-06	2.86948e-05	OTTHUMG00000150679.6	SCUBE1	HGNC:13441
ENSG00000131845.14	270.869	-0.595346	0.135867	1.32927e-06	2.89838e-05	OTTHUMG00000183245.1	AC005261.1
ENSG00000254413.8	273.23	-0.941252	0.221839	1.37406e-06	2.9889e-05	OTTHUMG00000166282.1	CHKB-CPT1B	HGNC:41998
ENSG00000133315.11	652.338	-0.683636	0.158152	1.42771e-06	3.09822e-05	OTTHUMG00000167843.3	MACROD1	HGNC:29598
ENSG00000163071.11	172.701	-0.657402	0.151783	1.4438e-06	3.12573e-05	OTTHUMG00000128698.3	SPATA18	HGNC:29579
ENSG00000205293.5	41.9195	1.38695	0.329314	1.44282e-06	3.12573e-05	OTTHUMG00000164281.3	LINC01602	HGNC:51634
ENSG00000179750.16	308.048	0.63177	0.145638	1.4783e-06	3.19285e-05	OTTHUMG00000151085.2	APOBEC3B	HGNC:17352
ENSG00000136866.13	119.973	-0.890961	0.209836	1.51377e-06	3.2579e-05	OTTHUMG00000021019.2	ZFP37	HGNC:12863
ENSG00000008118.10	35.6188	1.75342	0.416291	1.53763e-06	3.29477e-05	OTTHUMG00000036361.5	CAMK1G	HGNC:14585
ENSG00000181085.15	259.167	-0.636417	0.147142	1.53811e-06	3.29477e-05	OTTHUMG00000146450.4	MAPK15	HGNC:24667
ENSG00000136933.17	758.847	-0.62185	0.143778	1.54671e-06	3.30827e-05	OTTHUMG00000020674.3	RABEPK	HGNC:16896
ENSG00000213468.7	393.036	-0.692443	0.161246	1.58395e-06	3.37448e-05	OTTHUMG00000022417.16	FIRRE	HGNC:49627
ENSG00000056487.16	260.065	-0.6994	0.163209	1.59166e-06	3.38338e-05	OTTHUMG00000151199.5	PHF21B	HGNC:25161
ENSG00000136167.14	86.6146	1.03636	0.246558	1.61776e-06	3.42919e-05	OTTHUMG00000016864.6	LCP1	HGNC:6528
ENSG00000173611.17	322.631	-0.765541	0.181143	1.74911e-06	3.67354e-05	OTTHUMG00000020667.4	SCAI	HGNC:26709
ENSG00000213694.5	198.601	0.693274	0.162489	1.77749e-06	3.72885e-05	OTTHUMG00000020173.3	S1PR3	HGNC:3167
ENSG00000115129.14	230.213	-0.775945	0.183296	1.79175e-06	3.75015e-05	OTTHUMG00000090817.4	TP53I3	HGNC:19373
ENSG00000145020.16	132.969	-0.899251	0.214498	1.82791e-06	3.81274e-05	OTTHUMG00000156847.13	AMT	HGNC:473
ENSG00000175197.12	407.829	0.630933	0.147236	1.85755e-06	3.87014e-05	OTTHUMG00000170046.4	DDIT3	HGNC:2726
ENSG00000260552.1	98.8016	-1.10673	0.266573	1.94469e-06	4.0333e-05	OTTHUMG00000176168.1	AC023043.1
ENSG00000181418.8	226.513	-0.656864	0.154937	1.98033e-06	4.08866e-05	OTTHUMG00000156183.2	DDN	HGNC:24458
ENSG00000164050.13	514.65	-0.631484	0.148136	1.98635e-06	4.09645e-05	OTTHUMG00000133527.6	PLXNB1	HGNC:9103
ENSG00000071282.12	127.628	0.897871	0.215251	2.05819e-06	4.23028e-05	OTTHUMG00000154971.6	LMCD1	HGNC:6633
ENSG00000185989.11	441.401	-0.736259	0.174909	2.08171e-06	4.27382e-05	OTTHUMG00000017399.4	RASA3	HGNC:20331
ENSG00000164853.9	86.4184	-1.22205	0.297837	2.19299e-06	4.49723e-05	OTTHUMG00000152022.3	UNCX	HGNC:33194
ENSG00000100036.13	165.489	0.698482	0.165686	2.25185e-06	4.61276e-05	OTTHUMG00000151110.2	SLC35E4	HGNC:17058
ENSG00000100288.19	731.955	-0.614563	0.144978	2.35254e-06	4.79215e-05	OTTHUMG00000150275.5	CHKB	HGNC:1938
ENSG00000107331.17	1702.71	-0.660348	0.157071	2.39743e-06	4.87816e-05	OTTHUMG00000020958.6	ABCA2	HGNC:32
ENSG00000100147.13	121.384	0.823178	0.198229	2.44284e-06	4.95951e-05	OTTHUMG00000151262.1	CCDC134	HGNC:26185
ENSG00000119328.12	567.833	-0.682862	0.162821	2.46036e-06	4.98954e-05	OTTHUMG00000020467.4	ABITRAM	HGNC:1364
ENSG00000135740.17	316.992	-0.716168	0.172245	2.66494e-06	5.36276e-05	OTTHUMG00000172935.4	SLC9A5	HGNC:11078
ENSG00000111846.17	91.0203	0.872215	0.211606	2.74666e-06	5.50654e-05	OTTHUMG00000014244.6	GCNT2	HGNC:4204
ENSG00000186792.17	193.459	-0.825847	0.200372	2.74845e-06	5.50654e-05	OTTHUMG00000156936.5	HYAL3	HGNC:5322
ENSG00000142669.15	656.829	0.680688	0.163897	2.98853e-06	5.9549e-05	OTTHUMG00000003381.3	SH3BGRL3	HGNC:15568
ENSG00000086506.3	87.2867	-1.02297	0.252146	3.07463e-06	6.11978e-05	OTTHUMG00000060727.2	HBQ1	HGNC:4833
ENSG00000119698.12	230.243	-0.64376	0.154716	3.17035e-06	6.30178e-05	OTTHUMG00000171344.3	PPP4R4	HGNC:23788
ENSG00000185339.9	86.7759	0.817756	0.199366	3.17296e-06	6.30178e-05	OTTHUMG00000151095.4	TCN2	HGNC:11653
ENSG00000187240.16	3046.71	-0.678829	0.164741	3.28241e-06	6.46993e-05	OTTHUMG00000165941.6	DYNC2H1	HGNC:2962
ENSG00000144668.12	119.745	-0.934148	0.230819	3.34923e-06	6.58743e-05	OTTHUMG00000130815.5	ITGA9	HGNC:6145
ENSG00000106211.9	2182.1	0.814247	0.200373	3.53469e-06	6.92239e-05	OTTHUMG00000023228.4	HSPB1	HGNC:5246
ENSG00000107295.10	191.305	0.665161	0.161658	3.66535e-06	7.14e-05	OTTHUMG00000019601.2	SH3GL2	HGNC:10831
ENSG00000262580.5	268.953	-0.585913	0.141105	3.73956e-06	7.2768e-05	OTTHUMG00000177568.3	AC087741.1
ENSG00000213648.10	125.479	1.01012	0.25244	3.87788e-06	7.53794e-05	OTTHUMG00000170468.2	SULT1A4	HGNC:30004
ENSG00000111261.14	296.781	0.596113	0.144444	4.05054e-06	7.84851e-05	OTTHUMG00000168541.4	MANSC1	HGNC:25505
ENSG00000148408.13	100.271	-0.83103	0.206503	4.06415e-06	7.86655e-05	OTTHUMG00000021002.4	CACNA1B	HGNC:1389
ENSG00000204103.4	483.243	-0.58752	0.142687	4.22581e-06	8.15354e-05	OTTHUMG00000033052.3	MAFB	HGNC:6408
ENSG00000162496.9	397.693	0.650123	0.159138	4.26805e-06	8.22635e-05	OTTHUMG00000001885.6	DHRS3	HGNC:17693
ENSG00000198393.8	347.248	-0.744345	0.185238	4.69377e-06	8.95245e-05	OTTHUMG00000167936.13	ZNF26	HGNC:13053
ENSG00000174775.17	1058.15	0.590475	0.144223	4.73753e-06	9.0265e-05	OTTHUMG00000131919.9	HRAS	HGNC:5173
ENSG00000204131.9	410.743	-0.833501	0.209844	4.98743e-06	9.43377e-05	OTTHUMG00000021807.4	NHSL2	HGNC:33737
ENSG00000054690.14	934.925	-0.585415	0.144249	5.16337e-06	9.71628e-05	OTTHUMG00000171272.4	PLEKHH1	HGNC:17733
ENSG00000100376.12	640.096	-0.596611	0.147342	5.44551e-06	0.000102052	OTTHUMG00000151338.4	FAM118A	HGNC:1313
ENSG00000146021.15	197.049	-0.686039	0.171191	5.49195e-06	0.000102817	OTTHUMG00000129155.14	KLHL3	HGNC:6354
ENSG00000172382.10	125.716	-0.817713	0.206954	5.734e-06	0.000107019	OTTHUMG00000128929.3	PRSS27	HGNC:15475
ENSG00000050165.18	111.154	0.876751	0.222912	5.76482e-06	0.000107375	OTTHUMG00000165709.4	DKK3	HGNC:2893
ENSG00000130158.14	1221.42	-0.6108	0.152305	6.2046e-06	0.000114516	OTTHUMG00000180826.3	DOCK6	HGNC:19189
ENSG00000172667.11	472.063	-0.592019	0.147577	6.51744e-06	0.000119445	OTTHUMG00000157290.7	ZMAT3	HGNC:29983
ENSG00000152784.16	81.3906	0.811548	0.207283	6.74328e-06	0.000123056	OTTHUMG00000160885.3	PRDM8	HGNC:13993
ENSG00000165323.15	243.055	0.77098	0.196424	6.79659e-06	0.000123693	OTTHUMG00000154468.4	FAT3	HGNC:23112
ENSG00000176894.10	510.049	0.711262	0.180365	6.81807e-06	0.00012396	OTTHUMG00000168019.3	PXMP2	HGNC:9716
ENSG00000137872.16	184.691	0.620503	0.155609	6.98265e-06	0.0001267	OTTHUMG00000172110.3	SEMA6D	HGNC:16770
ENSG00000135617.4	283.253	0.6037	0.1513	7.17071e-06	0.000129726	OTTHUMG00000129773.3	PRADC1	HGNC:16047
ENSG00000080166.16	36.9632	1.22176	0.320538	7.7399e-06	0.000139196	OTTHUMG00000017206.8	DCT	HGNC:2709
ENSG00000079102.16	526.712	-0.586756	0.147321	7.85429e-06	0.000141115	OTTHUMG00000164066.6	RUNX1T1	HGNC:1535
ENSG00000104881.16	336.101	-0.770175	0.199041	8.18845e-06	0.000146399	OTTHUMG00000181784.3	PPP1R13L	HGNC:18838
ENSG00000130649.10	104.559	-1.02358	0.268625	8.2244e-06	0.000146754	OTTHUMG00000019322.6	CYP2E1	HGNC:2631
ENSG00000077935.17	12.4415	-5.80323	2.46512	8.40616e-06	0.000149851	OTTHUMG00000151334.4	SMC1B	HGNC:11112
ENSG00000221818.9	138.022	0.88618	0.232226	8.46175e-06	0.000150256	OTTHUMG00000163838.3	EBF2	HGNC:19090
ENSG00000172061.8	9.14664	3.82282	0.929415	8.60513e-06	0.000152357	OTTHUMG00000156048.2	LRRC15	HGNC:20818
ENSG00000280287.1	116.792	0.748449	0.193327	8.60346e-06	0.000152357	OTTHUMG00000168042.1	AC131212.3
ENSG00000124813.23	84.3984	0.801676	0.207859	8.75537e-06	0.00015427	OTTHUMG00000014774.10	RUNX2	HGNC:10472
ENSG00000236901.6	420.767	-0.871398	0.228305	8.92126e-06	0.000157042	OTTHUMG00000020635.2	MIR600HG	HGNC:23642
ENSG00000029534.20	348.404	-0.643154	0.165185	9.01679e-06	0.000158571	OTTHUMG00000150281.8	ANK1	HGNC:492
ENSG00000139567.13	102.872	0.772304	0.200591	9.13785e-06	0.000160237	OTTHUMG00000169507.5	ACVRL1	HGNC:175
ENSG00000099250.18	946.518	0.590438	0.150162	9.32175e-06	0.000162526	OTTHUMG00000019343.8	NRP1	HGNC:8004
ENSG00000055955.17	64.2985	-1.1984	0.319675	9.4758e-06	0.00016474	OTTHUMG00000159023.3	ITIH4	HGNC:6169
ENSG00000168453.15	18.5249	-2.22389	0.579775	9.47504e-06	0.00016474	OTTHUMG00000097089.5	HR	HGNC:5172
ENSG00000140090.17	134.706	-0.691791	0.178899	9.69736e-06	0.000168112	OTTHUMG00000167589.4	SLC24A4	HGNC:10978
ENSG00000169083.17	25.8193	-1.96871	0.519187	9.99257e-06	0.000172412	OTTHUMG00000021740.7	AR	HGNC:644
ENSG00000119632.4	80.2524	-0.890079	0.234972	1.00562e-05	0.000173347	OTTHUMG00000171313.2	IFI27L2	HGNC:19753
ENSG00000226742.4	99.0164	-0.946735	0.25095	1.00789e-05	0.000173573	OTTHUMG00000180375.2	HSBP1L1	HGNC:37243
ENSG00000106034.18	14.0214	2.21099	0.58659	1.10363e-05	0.000188816	OTTHUMG00000156982.6	CPED1	HGNC:26159
ENSG00000145428.15	7.25698	-5.93351	2.5286	1.11031e-05	0.00018978	OTTHUMG00000161557.11	RNF175	HGNC:27735
ENSG00000173917.10	362.762	0.598867	0.154499	1.12562e-05	0.00019186	OTTHUMG00000159930.4	HOXB2	HGNC:5113
ENSG00000181218.5	485.698	-0.732285	0.192518	1.13276e-05	0.000192897	OTTHUMG00000040046.1	H2AW	HGNC:20507
ENSG00000163617.11	238.432	-0.613197	0.158506	1.13649e-05	0.000193351	OTTHUMG00000159337.5	CCDC191	HGNC:29272
ENSG00000251634.2	58.7755	-1.092	0.294821	1.17602e-05	0.000199334	OTTHUMG00000099405.6	NAIPP4	HGNC:54494
ENSG00000288051.1	13.7862	1.85875	0.506845	1.27682e-05	0.000215023	OTTHUMG00000194970.1	AC008060.5
ENSG00000167766.18	32.706	-1.30378	0.35413	1.30549e-05	0.000218843	OTTHUMG00000182761.4	ZNF83	HGNC:13158
ENSG00000227199.1	81.6577	-0.940749	0.255056	1.36338e-05	0.00022792	OTTHUMG00000039524.1	ST7-AS1	HGNC:16000
ENSG00000261052.5	139.417	-0.889097	0.240048	1.36626e-05	0.000228194	OTTHUMG00000048083.3	SULT1A3	HGNC:11455
ENSG00000258525.2	73.4005	-0.830664	0.222935	1.37047e-05	0.000228687	OTTHUMG00000170583.3	AL049830.3
ENSG00000139174.12	312.019	0.637647	0.167614	1.38105e-05	0.000230032	OTTHUMG00000169443.5	PRICKLE1	HGNC:17019
ENSG00000146054.18	147.983	-0.865267	0.233624	1.38857e-05	0.000231074	OTTHUMG00000130963.8	TRIM7	HGNC:16278
ENSG00000099958.14	169.135	0.804776	0.215556	1.39999e-05	0.000232551	OTTHUMG00000150743.2	DERL3	HGNC:14236
ENSG00000151490.14	21.5113	-1.94426	0.528085	1.40443e-05	0.000233076	OTTHUMG00000168786.2	PTPRO	HGNC:9678
ENSG00000120885.22	1123.18	0.646104	0.170449	1.47371e-05	0.000243248	OTTHUMG00000102114.8	CLU	HGNC:2095
ENSG00000261534.1	106.793	-0.804048	0.216438	1.49529e-05	0.000245701	OTTHUMG00000175795.1	AL596244.1
ENSG00000170835.15	63.5321	-0.991457	0.270728	1.52343e-05	0.000249876	OTTHUMG00000020855.2	CEL	HGNC:1848
ENSG00000174145.8	7.13655	-5.86838	2.53425	1.53556e-05	0.000251638	OTTHUMG00000157134.3	NWD2	HGNC:29229
ENSG00000170542.6	144.822	0.651398	0.173754	1.62896e-05	0.000265752	OTTHUMG00000014131.2	SERPINB9	HGNC:8955
ENSG00000221994.11	21.7751	-4.16274	0.99853	1.64936e-05	0.000268123	OTTHUMG00000021463.9	ZNF630	HGNC:28855
ENSG00000151006.7	248.521	-0.719628	0.194472	1.71847e-05	0.000278863	OTTHUMG00000047358.6	PRSS53	HGNC:34407
ENSG00000146966.13	264.93	0.687381	0.184912	1.73817e-05	0.000281171	OTTHUMG00000157411.3	DENND2A	HGNC:22212
ENSG00000259319.1	45.4273	1.30554	0.364382	1.75099e-05	0.000282883	OTTHUMG00000171868.1	AF111167.2
ENSG00000272512.1	242.932	-0.929717	0.256487	1.75311e-05	0.000282975	OTTHUMG00000185581.1	AL645608.7
ENSG00000137440.5	12.7277	2.19369	0.608354	1.78902e-05	0.000288009	OTTHUMG00000097745.2	FGFBP1	HGNC:19695
ENSG00000225361.4	153.027	-0.757144	0.205983	1.81097e-05	0.00029103	OTTHUMG00000020905.4	PPP1R26-AS1	HGNC:48717
ENSG00000174028.6	143.181	0.787953	0.214893	1.81828e-05	0.000291948	OTTHUMG00000021247.1	FAM3C2	HGNC:34501
ENSG00000172346.15	68.0693	0.841738	0.230412	1.83732e-05	0.000294487	OTTHUMG00000150967.5	CSDC2	HGNC:30359
ENSG00000173295.7	226.733	-0.63906	0.171602	1.8579e-05	0.000297524	OTTHUMG00000163669.6	FAM86B3P	HGNC:44371
ENSG00000131080.15	226.849	0.635004	0.170715	1.87017e-05	0.000298966	OTTHUMG00000021736.3	EDA2R	HGNC:17756
ENSG00000245958.6	204.155	-0.59926	0.161796	2.00583e-05	0.000316217	OTTHUMG00000160571.4	AC093752.1
ENSG00000121101.15	80.7526	0.833275	0.229994	2.02448e-05	0.000318616	OTTHUMG00000179245.2	TEX14	HGNC:11737
ENSG00000255284.2	129.489	-0.745634	0.204048	2.0317e-05	0.000319202	OTTHUMG00000165232.2	AP006621.3
ENSG00000176454.14	679.6	-0.620227	0.167466	2.05287e-05	0.000321699	OTTHUMG00000172349.4	LPCAT4	HGNC:30059
ENSG00000171798.18	169.27	-0.730179	0.200155	2.10498e-05	0.000327897	OTTHUMG00000019303.7	KNDC1	HGNC:29374
ENSG00000253552.8	221.39	0.615376	0.16713	2.14935e-05	0.000334522	OTTHUMG00000063274.7	HOXA-AS2	HGNC:43745
ENSG00000103740.10	60.0525	1.02227	0.287562	2.21025e-05	0.000342252	OTTHUMG00000143734.6	ACSBG1	HGNC:29567
ENSG00000167136.7	393.218	-0.599456	0.161995	2.22137e-05	0.000343682	OTTHUMG00000020763.2	ENDOG	HGNC:3346
ENSG00000073605.18	249.476	-0.743386	0.205039	2.23562e-05	0.000345594	OTTHUMG00000133248.6	GSDMB	HGNC:23690
ENSG00000167311.14	126.82	0.730138	0.201798	2.32238e-05	0.000356892	OTTHUMG00000011842.6	ART5	HGNC:24049
ENSG00000265690.7	85.5375	-0.76892	0.21322	2.33382e-05	0.00035835	OTTHUMG00000163737.3	AC074143.1
ENSG00000123689.6	367.93	0.654444	0.179006	2.3632e-05	0.000361342	OTTHUMG00000036479.2	G0S2	HGNC:30229
ENSG00000204054.14	489.489	-0.588543	0.159353	2.37313e-05	0.000362254	OTTHUMG00000020783.66	LINC00963	HGNC:48716
ENSG00000178038.17	164.743	-0.735782	0.204173	2.4274e-05	0.000369304	OTTHUMG00000128673.8	ALS2CL	HGNC:20605
ENSG00000120645.12	53.0979	-1.09403	0.312261	2.44196e-05	0.000370902	OTTHUMG00000167975.5	IQSEC3	HGNC:29193
ENSG00000232434.2	152.635	-0.802791	0.225778	2.66809e-05	0.000402571	OTTHUMG00000187258.2	AJM1	HGNC:37284
ENSG00000284976.1	468.111	-0.591054	0.161736	2.69945e-05	0.000405295	OTTHUMG00000192535.1	BX255925.3
ENSG00000260423.2	25.1702	-1.46446	0.42189	2.76523e-05	0.000413134	OTTHUMG00000172909.11	LINC02367	HGNC:53290
ENSG00000188573.8	108.996	0.824964	0.233046	2.86157e-05	0.000425441	OTTHUMG00000157012.5	FBLL1	HGNC:35458
ENSG00000273199.1	19.2897	1.94997	0.571762	2.93025e-05	0.000434238	OTTHUMG00000186487.1	AP000692.2
ENSG00000152689.18	22.1492	1.72363	0.500484	2.99286e-05	0.000442991	OTTHUMG00000152124.20	RASGRP3	HGNC:14545
ENSG00000278023.6	270.77	-0.632882	0.175369	2.99666e-05	0.000443002	OTTHUMG00000188399.3	RDM1	HGNC:19950
ENSG00000099953.10	203.51	0.591053	0.162967	3.08997e-05	0.000454223	OTTHUMG00000150742.3	MMP11	HGNC:7157
ENSG00000159450.12	60.7124	0.973271	0.280377	3.12963e-05	0.000458946	OTTHUMG00000013066.2	TCHH	HGNC:11791
ENSG00000168010.11	556.602	-0.611215	0.169764	3.15508e-05	0.000461936	OTTHUMG00000167961.3	ATG16L2	HGNC:25464
ENSG00000128298.17	33.0766	1.15915	0.337469	3.24026e-05	0.000471221	OTTHUMG00000151197.5	BAIAP2L2	HGNC:26203
ENSG00000130844.18	33.0935	-1.34334	0.394785	3.24113e-05	0.000471221	OTTHUMG00000163019.10	ZNF331	HGNC:15489
ENSG00000145431.11	316.328	0.590176	0.163889	3.27961e-05	0.000475218	OTTHUMG00000161803.5	PDGFC	HGNC:8801
ENSG00000166183.16	11.1912	-2.51983	0.728713	3.41697e-05	0.000494338	OTTHUMG00000170045.5	ASPG	HGNC:20123
ENSG00000128512.23	434.978	0.687511	0.19437	3.42375e-05	0.000494927	OTTHUMG00000155077.9	DOCK4	HGNC:19192
ENSG00000172460.17	405.514	-0.677105	0.191319	3.50265e-05	0.000505133	OTTHUMG00000191915.2	PRSS30P	HGNC:28753
ENSG00000136942.15	12725	-0.611549	0.171408	3.53241e-05	0.000507987	OTTHUMG00000020659.5	RPL35	HGNC:10344
ENSG00000273253.2	79.4894	-0.908783	0.264068	3.54308e-05	0.000508156	OTTHUMG00000186123.4	AL022328.4
ENSG00000123360.12	121.701	0.665958	0.188047	3.5874e-05	0.000513707	OTTHUMG00000169844.4	PDE1B	HGNC:8775
ENSG00000272449.2	137.347	-0.947328	0.278573	3.8739e-05	0.000552567	OTTHUMG00000185639.2	AL139246.5
ENSG00000243696.5	164.902	-0.775312	0.224887	3.9934e-05	0.000566078	OTTHUMG00000186063.4	AC006254.1
ENSG00000176771.17	58.6917	1.01432	0.299624	4.17659e-05	0.000588848	OTTHUMG00000153573.11	NCKAP5	HGNC:29847
ENSG00000183307.4	106.26	-0.679738	0.194862	4.21373e-05	0.000592713	OTTHUMG00000030471.6	TMEM121B	HGNC:1844
ENSG00000175445.17	146.166	0.660218	0.188614	4.22343e-05	0.000592949	OTTHUMG00000036645.9	LPL	HGNC:6677
ENSG00000269934.3	70.986	-0.927264	0.273451	4.24595e-05	0.00059541	OTTHUMG00000183900.3	AL353593.1
ENSG00000144713.13	12363.1	-0.599806	0.170058	4.26961e-05	0.000597811	OTTHUMG00000129804.5	RPL32	HGNC:10336
ENSG00000240086.7	101.212	0.728309	0.21114	4.4856e-05	0.000625179	OTTHUMG00000159842.6	AC092969.1
ENSG00000142700.12	22.7681	-1.6205	0.491739	4.52368e-05	0.000630005	OTTHUMG00000007884.4	DMRTA2	HGNC:13908
ENSG00000277561.5	8.85274	2.6638	0.788808	4.53402e-05	0.000630964	OTTHUMG00000188601.2	GOLGA8IP	HGNC:26660
ENSG00000226051.8	106.536	0.715342	0.207281	4.5479e-05	0.000632414	OTTHUMG00000018524.24	ZNF503-AS1	HGNC:27370
ENSG00000175772.11	280.442	-0.682617	0.197807	4.71663e-05	0.000652896	OTTHUMG00000155034.4	LINC01106	HGNC:26769
ENSG00000164619.10	141.387	0.779305	0.229058	4.87079e-05	0.000672707	OTTHUMG00000128675.24	BMPER	HGNC:24154
ENSG00000184384.14	221.728	0.62501	0.179932	4.90605e-05	0.000676771	OTTHUMG00000167677.3	MAML2	HGNC:16259
ENSG00000267152.1	9.6188	-4.76519	1.4569	4.90762e-05	0.000676771	OTTHUMG00000182110.1	AC093227.1
ENSG00000273117.1	111.86	0.790067	0.232837	4.95922e-05	0.000682855	OTTHUMG00000186379.1	AC144652.1
ENSG00000176697.19	27.3942	1.25864	0.380318	5.23099e-05	0.000714355	OTTHUMG00000178797.3	BDNF	HGNC:1033
ENSG00000273706.5	169.967	0.713967	0.20992	5.33939e-05	0.000726443	OTTHUMG00000188456.2	LHX1	HGNC:6593
ENSG00000260238.6	180.373	0.658988	0.192107	5.39507e-05	0.000732383	OTTHUMG00000014817.6	PMF1-BGLAP	HGNC:42953
ENSG00000163520.14	188.963	-0.740731	0.219645	5.53557e-05	0.000749785	OTTHUMG00000155437.10	FBLN2	HGNC:3601
ENSG00000030419.16	65.3705	-1.33092	0.410988	5.57329e-05	0.000754334	OTTHUMG00000133005.7	IKZF2	HGNC:13177
ENSG00000197106.7	96.1886	0.733475	0.217151	5.70949e-05	0.000771626	OTTHUMG00000011761.3	SLC6A17	HGNC:31399
ENSG00000144218.19	453.136	0.632438	0.185783	6.01103e-05	0.000808193	OTTHUMG00000153011.13	AFF3	HGNC:6473
ENSG00000110195.13	27.8629	1.54277	0.48032	6.11575e-05	0.000819861	OTTHUMG00000167876.3	FOLR1	HGNC:3791
ENSG00000275549.1	23.5119	-1.52524	0.480196	6.69741e-05	0.000886129	OTTHUMG00000187409.1	STPG3-AS1	HGNC:51176
ENSG00000204128.6	221.086	-0.593378	0.174297	6.76867e-05	0.000894268	OTTHUMG00000153996.3	C2orf72	HGNC:27418
ENSG00000162804.14	188.475	-0.661724	0.197842	6.98787e-05	0.000918579	OTTHUMG00000151803.4	SNED1	HGNC:24696
ENSG00000273036.3	45.4787	-1.3554	0.427429	6.99871e-05	0.000919341	OTTHUMG00000172707.2	AL390726.4
ENSG00000284606.1	46.1389	-1.13336	0.351489	7.07951e-05	0.000929287	OTTHUMG00000192230.1	AC105233.5
ENSG00000240591.2	34.307	1.09039	0.338585	7.16932e-05	0.000939052	OTTHUMG00000159059.2	AL096701.3
ENSG00000189423.13	152.349	-0.601613	0.178543	7.5041e-05	0.000977995	OTTHUMG00000179809.4	USP32P3	HGNC:43576
ENSG00000149418.11	18.8675	1.49174	0.471546	7.74713e-05	0.00100554	OTTHUMG00000165768.2	ST14	HGNC:11344
ENSG00000175161.13	40.7943	-1.01534	0.317625	7.79024e-05	0.00100881	OTTHUMG00000158990.3	CADM2	HGNC:29849
ENSG00000176868.2	183.186	-0.902892	0.281797	7.81879e-05	0.00101179	OTTHUMG00000186801.1	AL358781.1
ENSG00000228623.6	6.90923	-4.41387	1.37862	7.83944e-05	0.00101303	OTTHUMG00000020514.2	ZNF883	HGNC:27271
ENSG00000277701.5	712.116	-0.728996	0.222587	8.00907e-05	0.00103112	OTTHUMG00000188202.4	AC159540.2
ENSG00000171992.13	160.075	-0.708987	0.21596	8.04678e-05	0.00103355	OTTHUMG00000130078.3	SYNPO	HGNC:30672
ENSG00000169918.9	98.7827	-0.684061	0.207833	8.29343e-05	0.00105822	OTTHUMG00000129275.3	OTUD7A	HGNC:20718
ENSG00000281691.1	19.7057	-1.86978	0.60463	8.45816e-05	0.00107699	OTTHUMG00000189567.1	RBM5-AS1	HGNC:48871
ENSG00000140939.14	223.474	-0.591815	0.177225	8.54544e-05	0.00108432	OTTHUMG00000173316.3	NOL3	HGNC:7869
ENSG00000115896.16	99.7896	0.795453	0.246866	8.68698e-05	0.00110152	OTTHUMG00000132750.9	PLCL1	HGNC:9063
ENSG00000204389.10	268.711	-1.31974	0.429986	8.71298e-05	0.00110252	OTTHUMG00000031201.4	HSPA1A	HGNC:5232
ENSG00000128594.8	86.3956	0.712543	0.21796	8.75981e-05	0.00110687	OTTHUMG00000157563.4	LRRC4	HGNC:15586
ENSG00000129226.14	42.1537	1.19484	0.384878	9.19986e-05	0.00115278	OTTHUMG00000108146.6	CD68	HGNC:1693
ENSG00000213654.10	45.8289	0.914371	0.288092	9.22509e-05	0.00115453	OTTHUMG00000031244.4	GPSM3	HGNC:13945
ENSG00000272341.1	162.658	0.689794	0.212502	9.65701e-05	0.00119792	OTTHUMG00000185677.1	AL137003.1
ENSG00000262691.1	71.7063	-0.820626	0.257856	9.68631e-05	0.00120073	OTTHUMG00000177484.1	AC040160.2
ENSG00000180336.18	145.123	-0.69536	0.215328	9.78902e-05	0.001211	OTTHUMG00000153039.5	MEIOC	HGNC:26670
ENSG00000186130.5	311.031	-0.615995	0.188134	0.00010007	0.00123216	OTTHUMG00000020628.2	ZBTB6	HGNC:16764
ENSG00000272508.1	15.591	1.86853	0.604988	0.00010019	0.00123278	OTTHUMG00000185464.1	AL136982.6
ENSG00000244414.6	12.7945	-2.31287	0.726058	0.00010346	0.00126788	OTTHUMG00000036276.4	CFHR1	HGNC:4888
ENSG00000228519.3	35.9391	1.1747	0.381213	0.000103794	0.00127027	OTTHUMG00000021280.1	AC097263.1
ENSG00000255455.2	13.5942	-1.74177	0.56549	0.000105551	0.00128661	OTTHUMG00000165662.2	AP003486.1
ENSG00000011052.21	569.112	0.641736	0.197692	0.000105872	0.00128966	OTTHUMG00000137475.4	NME1-NME2	HGNC:33531
ENSG00000287064.1	12.6592	1.8137	0.588636	0.000107143	0.00130167	OTTHUMG00000195776.1	AL606500.1
ENSG00000248019.3	84.14	-0.763438	0.240599	0.000107472	0.00130394	OTTHUMG00000161035.2	FAM13A-AS1	HGNC:19370
ENSG00000146013.11	38.2338	1.10294	0.358843	0.000108269	0.00131187	OTTHUMG00000129200.3	GFRA3	HGNC:4245
ENSG00000183580.10	36.7064	-1.12564	0.365887	0.000108754	0.00131513	OTTHUMG00000161798.2	FBXL7	HGNC:13604
ENSG00000143382.15	63.066	-0.962628	0.311398	0.0001106	0.00133215	OTTHUMG00000034863.6	ADAMTSL4	HGNC:19706
ENSG00000161509.14	104.36	-0.667881	0.20832	0.000114786	0.00137532	OTTHUMG00000044524.4	GRIN2C	HGNC:4587
ENSG00000283486.2	522.27	-0.615089	0.189955	0.00011568	0.00138332	OTTHUMG00000186324.3	FAM95C	HGNC:45272
ENSG00000185615.15	172.356	-0.614068	0.189579	0.000117283	0.00139973	OTTHUMG00000064891.5	PDIA2	HGNC:14180
ENSG00000107147.13	12.1145	-2.14638	0.697996	0.000119625	0.00142211	OTTHUMG00000020917.12	KCNT1	HGNC:18865
ENSG00000100033.16	102.875	-0.65273	0.205016	0.000123873	0.00146499	OTTHUMG00000150163.5	PRODH	HGNC:9453
ENSG00000168079.17	66.2826	0.842858	0.271843	0.000126043	0.00148872	OTTHUMG00000132172.4	SCARA5	HGNC:28701
ENSG00000158258.16	90.5678	0.683581	0.215565	0.000126771	0.00149635	OTTHUMG00000160139.5	CLSTN2	HGNC:17448
ENSG00000055118.15	169.738	0.634682	0.199136	0.000128313	0.00151261	OTTHUMG00000158341.5	KCNH2	HGNC:6251
ENSG00000160539.6	112.315	-0.835115	0.270721	0.000129638	0.00152625	OTTHUMG00000020822.3	PLPP7	HGNC:28174
ENSG00000074317.11	162.76	-0.633326	0.198812	0.000131003	0.00153935	OTTHUMG00000130661.3	SNCB	HGNC:11140
ENSG00000213023.11	175.483	-0.602303	0.188047	0.000132765	0.00155705	OTTHUMG00000183064.3	SYT3	HGNC:11511
ENSG00000286032.1	13.579	-4.71383	2.36758	0.000134494	0.00157328	OTTHUMG00000193762.1	FP236383.6
ENSG00000136928.7	242.007	0.598221	0.187496	0.000140264	0.00163763	OTTHUMG00000020345.6	GABBR2	HGNC:4507
ENSG00000267278.6	109.254	-0.598317	0.18786	0.000143157	0.00166715	OTTHUMG00000180362.4	MAP3K14-AS1	HGNC:44359
ENSG00000114268.12	373.726	-0.73349	0.237556	0.000143947	0.00167529	OTTHUMG00000133528.20	PFKFB4	HGNC:8875
ENSG00000214029.5	233.553	-0.632783	0.20091	0.000145823	0.00169496	OTTHUMG00000167943.4	ZNF891	HGNC:38709
ENSG00000253161.5	95.2045	-0.721194	0.232558	0.000146752	0.0017025	OTTHUMG00000163996.2	LINC01605	HGNC:51654
ENSG00000147676.14	57.6977	-2.34496	0.727379	0.00015006	0.00173319	OTTHUMG00000164973.5	MAL2	HGNC:13634
ENSG00000106069.22	157.836	0.669771	0.214719	0.000150784	0.00174044	OTTHUMG00000023063.12	CHN2	HGNC:1944
ENSG00000168993.15	139.374	-0.600294	0.190482	0.000154587	0.0017776	OTTHUMG00000160005.3	CPLX1	HGNC:2309
ENSG00000161149.12	65.2316	0.753204	0.244947	0.000155542	0.00178633	OTTHUMG00000150876.15	TUBA3FP	HGNC:24067
ENSG00000127507.18	38.8421	-1.21897	0.416552	0.000165203	0.00188426	OTTHUMG00000183408.4	ADGRE2	HGNC:3337
ENSG00000150051.14	170.463	0.654949	0.211414	0.00016739	0.00190564	OTTHUMG00000017862.6	MKX	HGNC:23729
ENSG00000124749.17	19.1774	-1.6379	0.555028	0.000168604	0.00191725	OTTHUMG00000014907.6	COL21A1	HGNC:17025
ENSG00000254389.3	59.9344	0.823788	0.273531	0.000168956	0.00191749	OTTHUMG00000165005.1	RHPN1-AS1	HGNC:28457
ENSG00000189409.14	88.0924	-0.712308	0.233627	0.000173303	0.00196194	OTTHUMG00000074713.7	MMP23B	HGNC:7171
ENSG00000280007.1	108.27	-0.701619	0.229337	0.000173516	0.00196194	OTTHUMG00000189278.1	AC008079.1
ENSG00000105750.15	51.8964	-1.20927	0.411099	0.00017543	0.00197624	OTTHUMG00000182747.6	ZNF85	HGNC:13160
ENSG00000162849.16	159.411	0.699624	0.229627	0.000178599	0.00200945	OTTHUMG00000040079.4	KIF26B	HGNC:25484
ENSG00000282933.2	82.5173	-0.711106	0.233987	0.000181211	0.00203509	OTTHUMG00000191483.3	RHOXF1P3	HGNC:51612
ENSG00000100302.7	98.0671	0.635168	0.205564	0.000182635	0.0020448	OTTHUMG00000150607.2	RASD2	HGNC:18229
ENSG00000272335.1	273.004	-0.705332	0.232938	0.000184355	0.00206153	OTTHUMG00000185479.1	AC093297.2
ENSG00000130477.15	126.445	-0.682658	0.224237	0.000184745	0.00206463	OTTHUMG00000163877.4	UNC13A	HGNC:23150
ENSG00000231955.1	56.5085	-0.927041	0.315526	0.000188147	0.00209879	OTTHUMG00000154651.1	AC007383.3
ENSG00000154175.17	63.4962	0.877949	0.298284	0.000196791	0.00218455	OTTHUMG00000159094.7	ABI3BP	HGNC:17265
ENSG00000196878.15	43.2562	0.921528	0.315875	0.000201176	0.00222916	OTTHUMG00000036360.5	LAMB3	HGNC:6490
ENSG00000212766.9	9.05588	2.5613	0.897699	0.000202114	0.00223726	OTTHUMG00000133319.4	EWSAT1	HGNC:26596
ENSG00000168918.14	124.802	-0.598325	0.195246	0.000209988	0.00231139	OTTHUMG00000133688.7	INPP5D	HGNC:6079
ENSG00000285000.1	302.529	0.859618	0.295491	0.000211933	0.00232718	OTTHUMG00000192507.1	AC008581.2
ENSG00000106688.12	160.792	0.612126	0.200293	0.00021278	0.00233508	OTTHUMG00000019468.3	SLC1A1	HGNC:10939
ENSG00000243766.8	39.0199	0.925844	0.318711	0.000213112	0.00233732	OTTHUMG00000063751.8	HOTTIP	HGNC:37461
ENSG00000231107.2	35.9609	1.22399	0.433219	0.000219341	0.00239415	OTTHUMG00000020194.5	LINC01508	HGNC:51190
ENSG00000183032.12	139.186	0.638436	0.211545	0.00022358	0.00242881	OTTHUMG00000140250.3	SLC25A21	HGNC:14411
ENSG00000170006.12	60.6843	1.23733	0.442438	0.000228296	0.00247416	OTTHUMG00000161463.2	TMEM154	HGNC:26489
ENSG00000177984.7	23.5826	-1.45147	0.517965	0.000229572	0.00248209	OTTHUMG00000020943.3	LCN15	HGNC:33777
ENSG00000138798.13	30.0085	1.07144	0.375071	0.000230377	0.00248933	OTTHUMG00000132044.8	EGF	HGNC:3229
ENSG00000284471.1	22.9748	-1.36607	0.486934	0.000231714	0.00250229	OTTHUMG00000191984.1	CR769775.2
ENSG00000160801.14	114.902	-0.674958	0.227086	0.000234391	0.00252672	OTTHUMG00000133515.6	PTH1R	HGNC:9608
ENSG00000259495.3	115.233	-0.615094	0.204365	0.000238862	0.00257037	OTTHUMG00000172167.4	AC016705.2
ENSG00000104419.15	2599.49	-1.02389	0.365769	0.000243549	0.00261465	OTTHUMG00000164441.4	NDRG1	HGNC:7679
ENSG00000285815.1	20.9488	2.06378	0.762382	0.000247206	0.00264613	OTTHUMG00000192633.1	WRB-SH3BGR
ENSG00000265158.1	6.84217	-4.59143	2.42029	0.000250778	0.00267809	OTTHUMG00000179653.1	LRRC37A7P	HGNC:43792
ENSG00000198406.7	263.824	0.643474	0.217352	0.000259432	0.00275762	OTTHUMG00000159328.2	BZW1P2	HGNC:33954
ENSG00000123609.11	87.7732	0.686202	0.232921	0.000262385	0.00278253	OTTHUMG00000131867.5	NMI	HGNC:7854
ENSG00000123338.13	22.0036	1.27908	0.460473	0.000262722	0.00278449	OTTHUMG00000169843.3	NCKAP1L	HGNC:4862
ENSG00000157766.18	48.984	0.933837	0.331217	0.000264454	0.00279959	OTTHUMG00000171989.8	ACAN	HGNC:319
ENSG00000226287.8	26.0937	1.28123	0.465623	0.000264719	0.00280078	OTTHUMG00000150164.4	TMEM191A	HGNC:25317
ENSG00000106018.14	16.6227	-1.70202	0.611714	0.000266275	0.00281561	OTTHUMG00000151446.4	VIPR2	HGNC:12695
ENSG00000232150.3	62.9746	0.925289	0.328422	0.000269554	0.00284595	OTTHUMG00000016930.1	ST13P4	HGNC:18487
ENSG00000184068.2	71.9831	0.772008	0.267732	0.000270116	0.00284963	OTTHUMG00000151272.1	SREBF2-AS1	HGNC:53953
ENSG00000185483.12	349.475	0.626287	0.211484	0.000271927	0.00286378	OTTHUMG00000009022.2	ROR1	HGNC:10256
ENSG00000151773.13	315.381	0.593941	0.198731	0.000272322	0.00286622	OTTHUMG00000017413.9	CCDC122	HGNC:26478
ENSG00000130234.11	38.3889	1.0231	0.366767	0.000274661	0.00288426	OTTHUMG00000193402.2	ACE2	HGNC:13557
ENSG00000061656.10	58.339	-0.972052	0.349764	0.000276483	0.00289699	OTTHUMG00000032352.6	SPAG4	HGNC:11214
ENSG00000139438.6	153.237	0.585826	0.196287	0.000277872	0.00290795	OTTHUMG00000169260.2	FAM222A	HGNC:25915
ENSG00000130822.15	45.1217	-0.874825	0.310347	0.000283639	0.0029507	OTTHUMG00000024216.7	PNCK	HGNC:13415
ENSG00000117407.17	20.1435	-1.48527	0.543307	0.000286066	0.0029682	OTTHUMG00000007705.4	ARTN	HGNC:727
ENSG00000284194.2	330.83	-0.625083	0.212587	0.000287742	0.0029822	OTTHUMG00000191637.2	SCO2	HGNC:10604
ENSG00000101680.15	941.477	-0.608648	0.206403	0.000289767	0.00299809	OTTHUMG00000133478.5	LAMA1	HGNC:6481
ENSG00000105278.11	9.09562	-2.34578	0.827316	0.00029081	0.00300378	OTTHUMG00000180918.6	ZFR2	HGNC:29189
ENSG00000211448.12	12.4926	-1.82806	0.675889	0.000290786	0.00300378	OTTHUMG00000171443.6	DIO2	HGNC:2884
ENSG00000005108.16	44.7578	1.09862	0.401529	0.000295539	0.00303757	OTTHUMG00000152346.5	THSD7A	HGNC:22207
ENSG00000263244.2	373.743	-1.11145	0.410723	0.000295379	0.00303757	OTTHUMG00000178148.2	AC087190.3
ENSG00000103269.13	82.4508	-0.762687	0.268495	0.000300524	0.00307801	OTTHUMG00000121141.4	RHBDL1	HGNC:10007
ENSG00000164867.11	48.2943	0.933292	0.336486	0.000302458	0.00309435	OTTHUMG00000158343.5	NOS3	HGNC:7876
ENSG00000197261.11	23.88	-1.70169	0.611144	0.000308022	0.00314073	OTTHUMG00000014820.6	C6orf141	HGNC:21351
ENSG00000166736.11	16.238	1.51599	0.558414	0.000310357	0.00316101	OTTHUMG00000160494.2	HTR3A	HGNC:5297
ENSG00000287725.1	75.1914	-0.826349	0.295419	0.000314947	0.00319706	OTTHUMG00000167898.5	AP003071.5
ENSG00000158560.14	61.1117	0.724688	0.253893	0.000317976	0.00322244	OTTHUMG00000153983.6	DYNC1I1	HGNC:2963
ENSG00000288062.1	94.2275	-0.607449	0.207162	0.000318276	0.00322369	OTTHUMG00000194909.1	AL136981.3
ENSG00000155265.11	38.3103	-0.850263	0.305206	0.000320617	0.0032456	OTTHUMG00000018869.3	GOLGA7B	HGNC:31668
ENSG00000232807.2	40.4898	-0.859247	0.30893	0.000322253	0.00326036	OTTHUMG00000017611.2	AL137186.2
ENSG00000186567.13	205.201	-0.660111	0.22927	0.000323663	0.00326591	OTTHUMG00000151528.6	CEACAM19	HGNC:31951
ENSG00000079435.10	80.0842	0.676119	0.235791	0.000326463	0.00329077	OTTHUMG00000182814.4	LIPE	HGNC:6621
ENSG00000183570.16	131.294	-0.589568	0.201073	0.00032652	0.00329077	OTTHUMG00000090399.10	PCBP3	HGNC:8651
ENSG00000111801.16	237.583	-0.607342	0.208618	0.000330982	0.00333206	OTTHUMG00000014451.6	BTN3A3	HGNC:1140
ENSG00000126733.21	64.5009	0.765953	0.27258	0.000333733	0.00335607	OTTHUMG00000021944.4	DACH2	HGNC:16814
ENSG00000100362.13	14.6179	1.56002	0.584316	0.000336387	0.00338089	OTTHUMG00000150547.15	PVALB	HGNC:9704
ENSG00000111799.21	85.1144	-0.822496	0.29758	0.000343241	0.00344032	OTTHUMG00000015051.8	COL12A1	HGNC:2188
ENSG00000260804.3	177.202	0.642084	0.223499	0.000345188	0.00345167	OTTHUMG00000176293.1	LINC01963	HGNC:25283
ENSG00000119227.8	68.3461	-0.790781	0.284378	0.000347173	0.00346452	OTTHUMG00000155522.3	PIGZ	HGNC:30596
ENSG00000184588.18	53.3513	0.82822	0.299008	0.000350857	0.00349365	OTTHUMG00000009088.6	PDE4B	HGNC:8781
ENSG00000165591.6	24.5901	-1.4609	0.540119	0.000355361	0.00353465	OTTHUMG00000021684.1	FAAH2	HGNC:26440
ENSG00000254612.2	26.9202	1.16861	0.438145	0.000358842	0.00356346	OTTHUMG00000165798.2	AP001000.1
ENSG00000215788.10	122.454	-0.591141	0.204395	0.000367106	0.00363368	OTTHUMG00000000831.9	TNFRSF25	HGNC:11910
ENSG00000196569.12	35.1078	-0.967592	0.359178	0.000370397	0.00365832	OTTHUMG00000015545.2	LAMA2	HGNC:6482
ENSG00000233384.3	19.4155	1.39636	0.530183	0.00037073	0.00365963	OTTHUMG00000037718.3	CNIH3-AS2	HGNC:41162
ENSG00000163492.15	15.7169	1.3356	0.506403	0.000384623	0.00377638	OTTHUMG00000132578.9	CCDC141	HGNC:26821
ENSG00000141505.12	72.1285	-0.718045	0.257264	0.000388603	0.0038134	OTTHUMG00000102159.7	ASGR1	HGNC:742
ENSG00000176204.13	67.5691	0.735418	0.264829	0.000389469	0.0038178	OTTHUMG00000152842.3	LRRTM4	HGNC:19411
ENSG00000134533.6	59.1222	0.763692	0.278554	0.000406161	0.00396018	OTTHUMG00000168745.2	RERG	HGNC:15980
ENSG00000125384.7	35.686	0.953935	0.357677	0.000421138	0.00408008	OTTHUMG00000140300.3	PTGER2	HGNC:9594
ENSG00000128655.18	51.8965	0.781809	0.287784	0.000430223	0.00415708	OTTHUMG00000154188.8	PDE11A	HGNC:8773
ENSG00000228793.2	8.39706	2.18011	0.822798	0.000438717	0.00421685	OTTHUMG00000014145.4	AL033523.1
ENSG00000260469.3	22.8583	-1.19334	0.460258	0.000438574	0.00421685	OTTHUMG00000172684.4	INSYN1-AS1	HGNC:51422
ENSG00000232573.1	109.391	-0.597952	0.211729	0.000452058	0.00431107	OTTHUMG00000028964.2	RPL3P4	HGNC:19805
ENSG00000082482.13	13.1129	-2.24657	0.821213	0.00045343	0.0043219	OTTHUMG00000037017.4	KCNK2	HGNC:6277
ENSG00000170608.3	51.2499	-0.819875	0.307555	0.000455532	0.00433515	OTTHUMG00000182484.4	FOXA3	HGNC:5023
ENSG00000164418.20	5.95584	-3.74151	1.4098	0.000457403	0.00434679	OTTHUMG00000016328.7	GRIK2	HGNC:4580
ENSG00000198502.6	41.8714	0.860065	0.324419	0.00046753	0.00442627	OTTHUMG00000031027.4	HLA-DRB5	HGNC:4953
ENSG00000273314.1	98.5731	0.61242	0.219799	0.00047644	0.00449898	OTTHUMG00000186357.1	AC005229.4
ENSG00000270757.1	91.7436	0.645314	0.233666	0.000481002	0.00453661	OTTHUMG00000184877.1	HSPE1-MOB4	HGNC:49184
ENSG00000237452.2	65.4518	0.635084	0.229617	0.000488005	0.00458921	OTTHUMG00000156178.3	BHMG1	HGNC:44318
ENSG00000182916.8	16.7811	-1.48582	0.592415	0.00049035	0.00460652	OTTHUMG00000022096.2	TCEAL7	HGNC:28336
ENSG00000196812.5	110.98	0.673958	0.247103	0.000494465	0.00463802	OTTHUMG00000014509.2	ZSCAN16	HGNC:20813
ENSG00000262468.6	106.446	-0.611024	0.221715	0.000497701	0.0046612	OTTHUMG00000177618.3	LINC01569	HGNC:51380
ENSG00000176406.23	54.3078	-0.779336	0.295664	0.000537345	0.00497133	OTTHUMG00000162097.12	RIMS2	HGNC:17283
ENSG00000229415.9	90.9823	0.633648	0.231896	0.000543173	0.00501509	OTTHUMG00000170540.2	SFTA3	HGNC:18387
ENSG00000277758.4	117.079	-0.637494	0.236354	0.000558411	0.0051376	OTTHUMG00000189287.1	FO681492.1
ENSG00000149654.11	38.407	-0.97117	0.383618	0.000568516	0.00522006	OTTHUMG00000033073.3	CDH22	HGNC:13251
ENSG00000144339.12	20.7	-1.52183	0.605851	0.000580482	0.00531125	OTTHUMG00000132723.5	TMEFF2	HGNC:11867
ENSG00000131650.14	79.3982	-0.679673	0.256195	0.000591896	0.00539407	OTTHUMG00000128976.3	KREMEN2	HGNC:18797
ENSG00000125510.18	109.814	-0.660384	0.248132	0.0005941	0.00540607	OTTHUMG00000033027.3	OPRL1	HGNC:8155
ENSG00000234546.4	12.8478	-1.44393	0.59266	0.000600527	0.00545296	OTTHUMG00000001764.8	LNCTAM34A	HGNC:52548
ENSG00000049249.8	24.2085	1.20387	0.487387	0.000603246	0.00547294	OTTHUMG00000001223.3	TNFRSF9	HGNC:11924
ENSG00000184702.20	1068.69	0.594285	0.218789	0.000610094	0.00552136	OTTHUMG00000150399.9	SEPTIN5	HGNC:9164
ENSG00000162669.16	149.962	-0.586337	0.215598	0.000612062	0.00553643	OTTHUMG00000010093.6	HFM1	HGNC:20193
ENSG00000178809.11	78.8589	-0.766404	0.297565	0.000626922	0.00564014	OTTHUMG00000156075.7	TRIM73	HGNC:18162
ENSG00000227825.4	13.8247	1.4002	0.571149	0.000658707	0.0058884	OTTHUMG00000170629.1	SLC9A7P1	HGNC:32679
ENSG00000205832.7	24.0766	-1.18312	0.485461	0.00066193	0.00591143	OTTHUMG00000176519.2	C16orf96	HGNC:40031
ENSG00000182648.13	92.7335	0.611421	0.229131	0.000677884	0.0060274	OTTHUMG00000157237.9	LINC01006	HGNC:48971
ENSG00000151388.11	45.9577	-2.55148	0.903291	0.00067824	0.00602763	OTTHUMG00000162088.5	ADAMTS12	HGNC:14605
ENSG00000136160.17	28.5911	0.987585	0.401962	0.000683322	0.00606394	OTTHUMG00000017111.14	EDNRB	HGNC:3180
ENSG00000245105.4	13.9162	-1.47769	0.613378	0.000684228	0.00606609	OTTHUMG00000168289.4	A2M-AS1	HGNC:27057
ENSG00000287104.1	120.684	0.586838	0.219367	0.000692706	0.00612587	OTTHUMG00000193864.1	AC097382.3
ENSG00000131831.18	72.7075	0.622568	0.235553	0.000696656	0.00614645	OTTHUMG00000021209.6	RAI2	HGNC:9835
ENSG00000258881.6	95.1968	-0.660656	0.253648	0.000717741	0.00629903	OTTHUMG00000129708.6	AC007040.2
ENSG00000164794.9	11.6198	-2.3839	0.921331	0.000718554	0.00630313	OTTHUMG00000165637.2	KCNV1	HGNC:18861
ENSG00000268061.5	54.5088	-0.728971	0.285935	0.000733846	0.00641878	OTTHUMG00000183420.3	NAPA-AS1	HGNC:44118
ENSG00000249069.8	87.9718	-0.647022	0.249569	0.00074459	0.0064972	OTTHUMG00000162286.21	LINC01033	HGNC:49019
ENSG00000177685.17	89.8812	0.586356	0.221296	0.000759748	0.00661053	OTTHUMG00000165267.8	CRACR2B	HGNC:28703
ENSG00000128242.13	145.661	0.614306	0.234995	0.000777625	0.00675642	OTTHUMG00000151200.4	GAL3ST1	HGNC:24240
ENSG00000126950.8	61.6382	0.72993	0.290136	0.000784154	0.00680022	OTTHUMG00000022016.2	TMEM35A	HGNC:25864
ENSG00000180287.17	16.9961	-1.75109	0.717296	0.000805783	0.00695264	OTTHUMG00000039867.4	PLD5	HGNC:26879
ENSG00000196172.9	32.7113	-1.30897	0.543841	0.00080867	0.00696982	OTTHUMG00000150831.4	ZNF681	HGNC:26457
ENSG00000135318.12	23.407	-1.2374	0.527092	0.000810147	0.00697305	OTTHUMG00000015139.3	NT5E	HGNC:8021
ENSG00000136883.14	33.2802	-0.940675	0.394394	0.000817747	0.00702776	OTTHUMG00000020533.5	KIF12	HGNC:21495
ENSG00000276791.1	78.1919	0.605847	0.232736	0.000818085	0.00702776	OTTHUMG00000177359.2	AC092117.1
ENSG00000100285.10	20.4345	1.40534	0.610485	0.000819778	0.007039	OTTHUMG00000151155.3	NEFH	HGNC:7737
ENSG00000047662.5	15.4388	1.66074	0.726219	0.000824321	0.00706472	OTTHUMG00000160287.3	FAM184B	HGNC:29235
ENSG00000198113.3	82.2718	-0.644977	0.252236	0.000828008	0.00709299	OTTHUMG00000131779.2	TOR4A	HGNC:25981
ENSG00000178235.7	10.6804	-1.76545	0.744364	0.000833943	0.00713108	OTTHUMG00000017149.1	SLITRK1	HGNC:20297
ENSG00000149295.14	17.0242	1.23888	0.530428	0.000837385	0.00714652	OTTHUMG00000167717.3	DRD2	HGNC:3023
ENSG00000152932.8	32.1554	-0.887704	0.369673	0.000839116	0.00715795	OTTHUMG00000097053.4	RAB3C	HGNC:30269
ENSG00000240280.7	82.3806	-0.642083	0.252836	0.000888046	0.00750512	OTTHUMG00000154404.3	TCAM1P	HGNC:30707
ENSG00000203650.9	6.88625	-2.66068	1.03922	0.00089375	0.00753952	OTTHUMG00000022260.7	LINC01285	HGNC:50344
ENSG00000180353.11	58.3746	-0.693295	0.279659	0.000915055	0.00767608	OTTHUMG00000159409.3	HCLS1	HGNC:4844
ENSG00000248587.8	61.5944	-0.672273	0.268886	0.0009154	0.00767608	OTTHUMG00000162110.4	GDNF-AS1	HGNC:43592
ENSG00000028137.19	20.5301	1.22812	0.535227	0.000915869	0.00767649	OTTHUMG00000001829.2	TNFRSF1B	HGNC:11917
ENSG00000064201.15	4.97444	-3.52289	1.49222	0.000917176	0.00767836	OTTHUMG00000009762.20	TSPAN32	HGNC:13410
ENSG00000178033.6	83.0678	0.609954	0.238445	0.000916651	0.00767836	OTTHUMG00000015442.2	CALHM5	HGNC:21568
ENSG00000227953.7	59.131	-0.87061	0.365962	0.000919569	0.00768886	OTTHUMG00000040519.6	LINC01341	HGNC:49457
ENSG00000052344.16	20.4019	1.1012	0.477344	0.000924395	0.00772316	OTTHUMG00000176750.5	PRSS8	HGNC:9491
ENSG00000283709.1	51.018	-0.866316	0.365414	0.000937155	0.00780103	OTTHUMG00000017849.2	FAM238C	HGNC:24672
ENSG00000198108.4	78.0874	-0.664509	0.267236	0.000957333	0.00795109	OTTHUMG00000163043.2	CHSY3	HGNC:24293
ENSG00000175886.10	10.5493	-1.99894	0.893199	0.000963822	0.00799046	OTTHUMG00000155303.2	RPL7AP66	HGNC:35682
ENSG00000172794.20	23.7821	-0.961297	0.413808	0.000974095	0.0080537	OTTHUMG00000134282.5	RAB37	HGNC:30268
ENSG00000250159.7	82.4489	-0.628092	0.251374	0.000998105	0.00821738	OTTHUMG00000163307.3	AC106791.1
ENSG00000273489.1	364.542	-0.593756	0.236254	0.00104286	0.00852961	OTTHUMG00000186336.1	AC008264.2
ENSG00000048052.21	61.9363	0.718966	0.29906	0.00106613	0.00867722	OTTHUMG00000152487.8	HDAC9	HGNC:14065
ENSG00000152049.6	28.5942	1.1035	0.48621	0.00107579	0.00874025	OTTHUMG00000133161.4	KCNE4	HGNC:6244
ENSG00000188227.13	8.79865	-1.80114	0.805397	0.00107541	0.00874025	OTTHUMG00000182003.5	ZNF793	HGNC:33115
ENSG00000218537.1	344.478	0.622005	0.251156	0.00107656	0.00874265	OTTHUMG00000150772.2	MIF-AS1	HGNC:27669
ENSG00000221866.9	66.8949	0.663764	0.271555	0.00108355	0.00878918	OTTHUMG00000155108.3	PLXNA4	HGNC:9102
ENSG00000166432.15	87.7796	-0.671196	0.276799	0.0010954	0.00887194	OTTHUMG00000022044.4	ZMAT1	HGNC:29377
ENSG00000260260.1	137.479	-0.771247	0.331765	0.00113102	0.00911238	OTTHUMG00000177010.1	SNHG19	HGNC:49574
ENSG00000242282.6	42.3458	-1.08334	0.482427	0.00113538	0.00913502	OTTHUMG00000151418.2	AC108488.1
ENSG00000263327.6	38.5046	-0.826851	0.358894	0.00116062	0.00930938	OTTHUMG00000160321.2	TAPT1-AS1	HGNC:26832
ENSG00000164411.12	14.929	1.39147	0.648219	0.00116607	0.00934491	OTTHUMG00000015166.6	GJB7	HGNC:16690
ENSG00000141293.16	8.27514	2.0377	0.907645	0.0011804	0.00944324	OTTHUMG00000178823.3	SKAP1	HGNC:15605
ENSG00000188993.3	58.7153	0.859742	0.376051	0.00119318	0.00952045	OTTHUMG00000160623.1	LRRC66	HGNC:34299
ENSG00000140873.16	10.2989	1.70176	0.783434	0.00120128	0.00957155	OTTHUMG00000137619.4	ADAMTS18	HGNC:17110
ENSG00000167995.16	132.806	0.784558	0.340686	0.00120168	0.00957155	OTTHUMG00000167469.4	BEST1	HGNC:12703
ENSG00000241106.8	40.7508	-0.880407	0.389254	0.00120344	0.0095814	OTTHUMG00000031213.7	HLA-DOB	HGNC:4937
ENSG00000279070.2	6.35174	2.29197	1.04364	0.00121631	0.00965439	OTTHUMG00000175955.2	AC073263.2
ENSG00000281371.1	24.9367	1.20032	0.560016	0.00122015	0.0096803	OTTHUMG00000189580.1	INE2	HGNC:6061
ENSG00000286504.1	38.846	-0.858442	0.378707	0.00122063	0.0096803	OTTHUMG00000195381.1	AC092745.4
ENSG00000249923.1	8.21731	1.68811	0.777547	0.00122445	0.00969792	OTTHUMG00000150567.4	AC007663.2
ENSG00000133805.15	73.3668	0.600886	0.245547	0.00124048	0.00980369	OTTHUMG00000165682.5	AMPD3	HGNC:470
ENSG00000176912.5	78.7373	-0.654304	0.275046	0.00126006	0.0099369	OTTHUMG00000195990.1	TYMSOS	HGNC:29553
ENSG00000170190.16	76.6347	-0.652111	0.275005	0.00126153	0.00994423	OTTHUMG00000179277.5	SLC16A5	HGNC:10926
ENSG00000100156.10	66.8801	-0.722495	0.311766	0.00126975	0.00999606	OTTHUMG00000151196.2	SLC16A8	HGNC:16270
ENSG00000166922.8	11.4284	-1.56619	0.73765	0.00128185	0.010087	OTTHUMG00000159447.2	SCG5	HGNC:10816
ENSG00000173267.14	164.087	0.647306	0.271575	0.00128627	0.0101087	OTTHUMG00000018656.2	SNCG	HGNC:11141
ENSG00000236975.2	48.0811	-0.787298	0.34723	0.00132601	0.010363	OTTHUMG00000041351.4	LINC02814	HGNC:54346
ENSG00000164404.8	35.2107	0.922029	0.423425	0.00135396	0.0105589	OTTHUMG00000059842.3	GDF9	HGNC:4224
ENSG00000180801.14	84.1067	0.6178	0.259255	0.00138669	0.0107363	OTTHUMG00000161067.4	ARSJ	HGNC:26286
ENSG00000010310.9	93.1413	-0.606507	0.253729	0.00138943	0.0107484	OTTHUMG00000182129.6	GIPR	HGNC:4271
ENSG00000015520.14	57.5943	0.677185	0.290163	0.0013974	0.0107826	OTTHUMG00000023691.3	NPC1L1	HGNC:7898
ENSG00000099994.11	64.8667	0.674359	0.291051	0.00143111	0.0109946	OTTHUMG00000150792.2	SUSD2	HGNC:30667
ENSG00000153832.12	63.5409	-0.622445	0.263916	0.00144241	0.0110629	OTTHUMG00000133206.4	FBXO36	HGNC:27020
ENSG00000196263.8	42.5883	-0.826745	0.374842	0.0014428	0.0110629	OTTHUMG00000181943.4	ZNF471	HGNC:23226
ENSG00000110042.8	26.2111	-1.07911	0.515213	0.00145721	0.011164	OTTHUMG00000167336.3	DTX4	HGNC:29151
ENSG00000158859.10	17.0429	1.12177	0.531146	0.00146623	0.011219	OTTHUMG00000034349.3	ADAMTS4	HGNC:220
ENSG00000130518.17	16.5055	-1.21178	0.579393	0.00148049	0.0113092	OTTHUMG00000183354.11	IQCN	HGNC:29350
ENSG00000154252.12	13.343	-1.39207	0.671114	0.00150204	0.0114308	OTTHUMG00000151473.3	GAL3ST2	HGNC:24869
ENSG00000275740.1	242.887	1.07537	0.528397	0.00149892	0.0114308	OTTHUMG00000188625.1	AC091959.3
ENSG00000174951.11	44.2735	1.17368	0.565978	0.0015045	0.0114448	OTTHUMG00000183325.3	FUT1	HGNC:4012
ENSG00000165092.13	31.8566	0.889492	0.414018	0.0015531	0.0117459	OTTHUMG00000020019.3	ALDH1A1	HGNC:402
ENSG00000135917.15	60.4554	0.652254	0.283481	0.00156389	0.0118227	OTTHUMG00000133185.7	SLC19A3	HGNC:16266
ENSG00000234380.2	6.58094	2.35255	1.10091	0.00157896	0.0119069	OTTHUMG00000086233.2	LINC01426	HGNC:50734
ENSG00000259112.2	26.8128	1.5751	0.759434	0.00159332	0.0119887	OTTHUMG00000171802.3	NDUFC2-KCTD14	HGNC:42956
ENSG00000178773.15	90.3685	-0.696534	0.307602	0.0016028	0.012047	OTTHUMG00000138051.6	CPNE7	HGNC:2320
ENSG00000214182.5	94.8101	0.682282	0.303928	0.0016409	0.012298	OTTHUMG00000017147.4	PTMAP5	HGNC:9628
ENSG00000227999.1	20.4092	-1.13223	0.557427	0.00164883	0.0123372	OTTHUMG00000040844.2	MTND5P1	HGNC:39644
ENSG00000132702.13	36.2395	-0.843976	0.402542	0.00172195	0.0127589	OTTHUMG00000033205.5	HAPLN2	HGNC:17410
ENSG00000183479.12	71.0152	-1.34597	0.729388	0.00175483	0.0129552	OTTHUMG00000159319.5	TREX2	HGNC:12270
ENSG00000244513.7	23.6101	-1.00505	0.495253	0.00179317	0.0131639	OTTHUMG00000158770.4	AC109587.1
ENSG00000050767.17	81.133	-0.610667	0.268627	0.00179967	0.0131935	OTTHUMG00000130890.5	COL23A1	HGNC:22990
ENSG00000173867.10	94.5068	0.657378	0.295526	0.0018001	0.0131935	OTTHUMG00000185776.2	AC013489.1
ENSG00000095370.20	24.1575	-0.997043	0.491049	0.00180923	0.0132498	OTTHUMG00000020717.6	SH2D3C	HGNC:16884
ENSG00000226167.1	36.7597	-0.864215	0.41677	0.00183156	0.0133758	OTTHUMG00000011941.1	AP4B1-AS1	HGNC:44114
ENSG00000182459.5	44.056	0.775917	0.364076	0.00184561	0.0134569	OTTHUMG00000132857.2	TEX19	HGNC:33802
ENSG00000130522.6	1491.84	-0.682421	0.317015	0.00186134	0.0135623	OTTHUMG00000183355.6	JUND	HGNC:6206
ENSG00000112852.7	21.8222	-1.04186	0.528081	0.00187865	0.0136622	OTTHUMG00000129606.6	PCDHB2	HGNC:8687
ENSG00000181856.15	90.0145	-0.670933	0.308245	0.00192148	0.0139212	OTTHUMG00000102181.6	SLC2A4	HGNC:11009
ENSG00000112245.12	766.784	1.13345	0.609508	0.00193855	0.0140171	OTTHUMG00000014949.6	PTP4A1	HGNC:9634
ENSG00000280434.1	31.1391	-0.788462	0.377598	0.00194315	0.0140337	OTTHUMG00000189193.1	AL031595.3
ENSG00000269707.2	33.2985	0.799459	0.384798	0.0019749	0.0141925	OTTHUMG00000182993.2	AC018730.1
ENSG00000005187.12	59.7457	0.599515	0.267128	0.0020359	0.0145255	OTTHUMG00000131552.7	ACSM3	HGNC:10522
ENSG00000286149.1	13.7025	-1.60778	0.801442	0.00208949	0.0148441	OTTHUMG00000193761.1	FP236383.11
ENSG00000286155.1	13.7025	-1.60778	0.801442	0.00208949	0.0148441	OTTHUMG00000193753.1	FP671120.11
ENSG00000286267.1	13.7025	-1.60778	0.801442	0.00208949	0.0148441	OTTHUMG00000193757.1	FP236383.13
ENSG00000244405.8	30.0871	1.23336	0.665029	0.00209381	0.014869	OTTHUMG00000156639.5	ETV5	HGNC:3494
ENSG00000164946.19	34.0249	0.853662	0.426894	0.00210762	0.0149497	OTTHUMG00000019575.6	FREM1	HGNC:23399
ENSG00000184985.16	46.7293	-0.691529	0.326369	0.00210875	0.0149519	OTTHUMG00000159981.4	SORCS2	HGNC:16698
ENSG00000230461.9	32.5786	0.825633	0.406796	0.00211714	0.014994	OTTHUMG00000036947.10	PROX1-AS1	HGNC:43656
ENSG00000077327.16	6.09748	2.15013	1.13376	0.00214261	0.0151274	OTTHUMG00000017808.4	SPAG6	HGNC:11215
ENSG00000107738.20	41.2102	0.731892	0.351741	0.00218897	0.0153953	OTTHUMG00000018426.5	VSIR	HGNC:30085
ENSG00000242715.8	8.97642	-1.86907	0.941153	0.00220564	0.0155061	OTTHUMG00000016731.4	CCDC169	HGNC:34361
ENSG00000243709.1	5.64427	2.8294	1.27508	0.00224049	0.0157213	OTTHUMG00000037443.5	LEFTY1	HGNC:6552
ENSG00000230091.6	61.1594	-0.634761	0.294458	0.0022526	0.0157767	OTTHUMG00000018601.2	TMEM254-AS1	HGNC:27340
ENSG00000133710.15	17.4361	-2.65145	1.0989	0.00226719	0.015866	OTTHUMG00000134305.8	SPINK5	HGNC:15464
ENSG00000287908.1	24.0766	-1.29824	0.740327	0.00228104	0.0159202	OTTHUMG00000193795.1	AC025165.6
ENSG00000280164.1	41.9401	-0.693377	0.333549	0.00232498	0.0161836	OTTHUMG00000189369.1	CU638689.5
ENSG00000164929.17	36.6259	0.747473	0.373504	0.00248429	0.0171229	OTTHUMG00000164782.3	BAALC	HGNC:14333
ENSG00000101194.18	32.1151	0.749812	0.377122	0.00249793	0.0171716	OTTHUMG00000032951.9	SLC17A9	HGNC:16192
ENSG00000224728.1	55.5811	-0.626883	0.297658	0.00256225	0.0175478	OTTHUMG00000156052.1	IMPDH1P8	HGNC:33963
ENSG00000177453.7	27.7894	-0.790957	0.409248	0.00272149	0.0184106	OTTHUMG00000131147.2	NIM1K	HGNC:28646
ENSG00000280279.1	34.1831	-0.763677	0.395225	0.00276656	0.0186533	OTTHUMG00000189255.1	AC240565.4
ENSG00000255079.1	12.3433	1.32886	0.80105	0.0027842	0.0187515	OTTHUMG00000166475.1	LINC02704	HGNC:54220
ENSG00000151224.13	23.7712	0.894512	0.493266	0.0028647	0.0191595	OTTHUMG00000018613.3	MAT1A	HGNC:6903
ENSG00000225259.4	33.7434	0.689753	0.347373	0.00286762	0.0191696	OTTHUMG00000164533.1	ST13P6	HGNC:18557
ENSG00000180264.11	6.30428	-2.24451	1.12461	0.00288244	0.01925	OTTHUMG00000020652.4	ADGRD2	HGNC:18651
ENSG00000271833.1	32.4083	-0.810109	0.435914	0.00292461	0.0195174	OTTHUMG00000185720.1	AL445222.2
ENSG00000272077.1	64.0084	-0.653887	0.325906	0.00292686	0.0195252	OTTHUMG00000185519.1	AC124045.1
ENSG00000172461.11	11.2305	-2.57394	1.16868	0.00294055	0.0196094	OTTHUMG00000015236.3	FUT9	HGNC:4020
ENSG00000220848.5	40.323	-0.756145	0.398565	0.0029545	0.019688	OTTHUMG00000015790.2	RPS18P9	HGNC:36483
ENSG00000231793.5	12.6216	-1.07928	0.630255	0.00296558	0.0197475	OTTHUMG00000154229.2	DOC2GP	HGNC:37962
ENSG00000137841.12	54.6337	0.592447	0.285301	0.00298755	0.0198606	OTTHUMG00000172412.4	PLCB2	HGNC:9055
ENSG00000215458.8	31.7073	-0.783054	0.418229	0.00301029	0.019987	OTTHUMG00000086882.1	AATBC	HGNC:51526
ENSG00000280332.1	55.6422	-0.590817	0.288365	0.00315509	0.0208348	OTTHUMG00000182408.1	AC020917.4
ENSG00000143340.6	22.5956	-0.902039	0.5124	0.00321714	0.0210845	OTTHUMG00000035262.1	FAM163A	HGNC:28274
ENSG00000269374.1	61.1755	0.650466	0.332195	0.00322635	0.0211222	OTTHUMG00000182818.1	AC011497.2
ENSG00000198538.11	42.5044	-0.656664	0.338781	0.00322878	0.0211237	OTTHUMG00000154564.9	ZNF28	HGNC:13073
ENSG00000099260.11	27.5645	0.816322	0.451696	0.00325965	0.021302	OTTHUMG00000010764.3	PALMD	HGNC:15846
ENSG00000250423.2	5.1636	1.91673	1.15183	0.00330676	0.0215867	OTTHUMG00000162980.2	KIAA1210	HGNC:29218
ENSG00000236021.2	7.05171	1.62288	0.984895	0.00337339	0.0219667	OTTHUMG00000034988.2	AL591043.2
ENSG00000154556.18	8.65816	1.42003	0.858285	0.00338319	0.0220148	OTTHUMG00000157215.10	SORBS2	HGNC:24098
ENSG00000144290.17	12.434	-2.63384	1.44619	0.00340435	0.0221396	OTTHUMG00000153938.6	SLC4A10	HGNC:13811
ENSG00000179083.6	8.32712	-1.41832	0.92112	0.00351596	0.0227331	OTTHUMG00000021975.2	FAM133A	HGNC:26748
ENSG00000100427.15	43.268	0.66048	0.347008	0.00356202	0.0229577	OTTHUMG00000150236.3	MLC1	HGNC:17082
ENSG00000142046.15	58.27	-0.634798	0.334337	0.00368846	0.0236201	OTTHUMG00000168127.4	TMEM91
ENSG00000203772.7	42.5591	-0.740577	0.417606	0.00369221	0.0236302	OTTHUMG00000019324.2	SPRN	HGNC:16871
ENSG00000266642.2	31.8427	1.18043	0.797263	0.00369966	0.0236613	OTTHUMG00000179498.3	AC024267.7
ENSG00000123612.16	79.6285	-0.588352	0.298928	0.00374358	0.023842	OTTHUMG00000131964.4	ACVR1C	HGNC:18123
ENSG00000255874.2	39.5942	0.716567	0.397015	0.00379526	0.0241039	OTTHUMG00000187398.2	LINC00346	HGNC:27492
ENSG00000176049.16	19.9284	-1.40017	0.831052	0.00380812	0.0241495	OTTHUMG00000129731.4	JAKMIP2	HGNC:29067
ENSG00000259417.3	11.557	-1.11948	0.707577	0.00380904	0.0241495	OTTHUMG00000172080.6	CTXND1	HGNC:50507
ENSG00000160111.13	35.8992	-0.677884	0.369753	0.00382457	0.0242311	OTTHUMG00000133549.5	CPAMD8	HGNC:23228
ENSG00000176884.15	24.8025	-0.776435	0.448445	0.00385751	0.0243554	OTTHUMG00000020976.7	GRIN1	HGNC:4584
ENSG00000147246.10	28.6002	-0.913846	0.563685	0.0040005	0.0250247	OTTHUMG00000022226.4	HTR2C	HGNC:5295
ENSG00000174564.13	32.5774	0.672698	0.369981	0.00403038	0.0251427	OTTHUMG00000159779.3	IL20RB	HGNC:6004
ENSG00000187688.15	25.374	0.762319	0.443309	0.00403443	0.0251594	OTTHUMG00000058989.9	TRPV2	HGNC:18082
ENSG00000234353.2	60.4774	-0.635262	0.34304	0.00408659	0.025398	OTTHUMG00000150708.3	AP000346.2
ENSG00000151012.13	1249.65	0.718458	0.419533	0.0041145	0.0255369	OTTHUMG00000133396.2	SLC7A11	HGNC:11059
ENSG00000010671.15	16.6932	0.963048	0.617138	0.00412706	0.0255799	OTTHUMG00000022022.2	BTK	HGNC:1133
ENSG00000137767.14	39.8593	-0.658018	0.367052	0.00418549	0.0258631	OTTHUMG00000131476.5	SQOR	HGNC:20390
ENSG00000164440.15	27.1139	0.816519	0.494926	0.00419403	0.0258881	OTTHUMG00000015688.3	TXLNB	HGNC:21617
ENSG00000089199.10	30.1281	-0.747088	0.442835	0.00421701	0.0260052	OTTHUMG00000031821.4	CHGB	HGNC:1930
ENSG00000278917.1	15.6669	-1.0179	0.664619	0.00422012	0.0260155	OTTHUMG00000182207.1	AC006213.6
ENSG00000230873.9	39.96	0.733054	0.425046	0.00423067	0.026063	OTTHUMG00000014304.5	STMND1	HGNC:44668
ENSG00000226174.7	37.6409	-0.687327	0.388697	0.00423429	0.0260765	OTTHUMG00000156137.35	TEX22	HGNC:40026
ENSG00000204196.5	71.2206	-0.640286	0.355027	0.0042653	0.0262233	OTTHUMG00000155492.1	RPL12P16	HGNC:36926
ENSG00000129451.12	12.3913	-1.09833	0.760793	0.004321	0.0264677	OTTHUMG00000182916.4	KLK10	HGNC:6358
ENSG00000138316.11	18.1513	-0.866711	0.562689	0.00435623	0.0266657	OTTHUMG00000018414.2	ADAMTS14	HGNC:14899
ENSG00000276600.5	16.4088	1.07511	0.774516	0.00437639	0.0267801	OTTHUMG00000189246.2	RAB7B	HGNC:30513
ENSG00000204444.11	25.6767	-0.736351	0.435581	0.00437957	0.0267906	OTTHUMG00000031250.5	APOM	HGNC:13916
ENSG00000106536.20	14.0757	1.00768	0.695746	0.00448566	0.0273623	OTTHUMG00000150803.10	POU6F2	HGNC:21694
ENSG00000269473.1	46.8533	-0.594824	0.319646	0.00451498	0.0275176	OTTHUMG00000183538.1	AC012313.8
ENSG00000137809.17	27.4157	-0.739129	0.447796	0.00457936	0.0278079	OTTHUMG00000172657.4	ITGA11	HGNC:6136
ENSG00000237457.6	12.0749	-1.11855	0.777026	0.00460227	0.0279007	OTTHUMG00000035535.1	LINC01351	HGNC:50577
ENSG00000188580.15	9.67878	1.24966	0.950745	0.00467203	0.0282083	OTTHUMG00000015500.3	NKAIN2	HGNC:16443
ENSG00000261786.1	58.8613	-0.607837	0.336579	0.0046823	0.0282266	OTTHUMG00000175704.1	AC006058.1
ENSG00000160207.9	50.5532	0.630219	0.355215	0.00472618	0.0284325	OTTHUMG00000086863.3	HSF2BP	HGNC:5226
ENSG00000269243.1	20.0587	1.33338	1.33842	0.00474317	0.0285066	OTTHUMG00000182239.1	AC008894.2
ENSG00000235172.8	11.9989	1.02275	0.732016	0.00475307	0.0285403	OTTHUMG00000163120.9	LINC01366	HGNC:27416
ENSG00000267757.4	35.2143	-0.632367	0.363504	0.00496226	0.0295922	OTTHUMG00000182128.1	EML2-AS1	HGNC:48331
ENSG00000161992.6	41.5017	-0.66316	0.396259	0.00498862	0.0297203	OTTHUMG00000154104.2	PRR35	HGNC:14139
ENSG00000157782.9	46.6924	-0.600591	0.337362	0.00504419	0.0300024	OTTHUMG00000156794.2	CABP1	HGNC:1384
ENSG00000228549.4	18.2184	0.927464	0.688263	0.00516944	0.030598	OTTHUMG00000002203.6	BX284668.2
ENSG00000156097.12	15.5211	0.875959	0.609298	0.00525675	0.0310043	OTTHUMG00000011633.4	GPR61	HGNC:13300
ENSG00000124134.9	11.7885	1.05345	0.864202	0.00538547	0.0316104	OTTHUMG00000033079.5	KCNS1	HGNC:6300
ENSG00000100095.19	12.7492	0.964273	0.750381	0.00547667	0.0320633	OTTHUMG00000150870.6	SEZ6L	HGNC:10763
ENSG00000146950.13	106.043	-0.64268	0.377135	0.00552851	0.0323461	OTTHUMG00000021121.3	SHROOM2	HGNC:630
ENSG00000211454.14	34.2339	-0.664266	0.407796	0.00560953	0.0327467	OTTHUMG00000002520.6	AKR7L	HGNC:24056
ENSG00000232882.1	12.8293	1.32434	1.01911	0.00566556	0.0329895	OTTHUMG00000057595.1	PHKA1P1	HGNC:33919
ENSG00000157150.5	7.97482	1.08736	0.901069	0.00568918	0.0330954	OTTHUMG00000129763.2	TIMP4	HGNC:11823
ENSG00000261693.1	11.8118	1.03321	0.838067	0.00571073	0.0332102	OTTHUMG00000164869.1	AC134682.1
ENSG00000253438.4	25.0324	-0.733889	0.497409	0.00578204	0.0335715	OTTHUMG00000165067.7	PCAT1	HGNC:43022
ENSG00000079841.18	21.8079	-0.789912	0.557075	0.00592685	0.0342815	OTTHUMG00000015009.12	RIMS1	HGNC:17282
ENSG00000149564.12	37.025	0.614116	0.367856	0.00593149	0.0342975	OTTHUMG00000151986.3	ESAM	HGNC:17474
ENSG00000165171.11	25.5837	-0.690529	0.451122	0.00596425	0.0344434	OTTHUMG00000130033.3	METTL27	HGNC:19068
ENSG00000279649.1	44.7642	-0.591895	0.357973	0.0061913	0.0354014	OTTHUMG00000177438.1	AC020978.9
ENSG00000265417.1	10.7488	-1.14083	0.962054	0.00629362	0.0358469	OTTHUMG00000178371.1	AP005119.2
ENSG00000183840.7	10.4958	1.08507	1.05936	0.00634429	0.0360681	OTTHUMG00000131679.3	GPR39	HGNC:4496
ENSG00000257576.1	32.0139	-0.673373	0.446909	0.00643139	0.0364385	OTTHUMG00000170572.1	HSPD1P4	HGNC:35146
ENSG00000287160.1	26.6725	0.743873	0.529732	0.00643701	0.0364591	OTTHUMG00000194699.1	Z82195.3
ENSG00000072818.12	43.4518	-0.675345	0.463628	0.0065484	0.036964	OTTHUMG00000102199.10	ACAP1	HGNC:16467
ENSG00000228701.2	14.936	0.906693	0.763992	0.00666051	0.0374349	OTTHUMG00000018750.3	TNKS2-AS1	HGNC:45173
ENSG00000178623.12	20.5965	-0.733576	0.531764	0.00671574	0.0376411	OTTHUMG00000133356.5	GPR35	HGNC:4492
ENSG00000249715.12	9.57331	-1.02352	1.00436	0.00677213	0.0378642	OTTHUMG00000154929.10	FER1L5	HGNC:19044
ENSG00000228288.7	47.1589	-0.587386	0.368331	0.00692378	0.0385823	OTTHUMG00000041399.3	PCAT6	HGNC:43714
ENSG00000169403.12	26.3346	0.740529	0.539962	0.0069664	0.0387489	OTTHUMG00000003953.2	PTAFR	HGNC:9582
ENSG00000286053.1	252.213	0.697173	0.53075	0.00702205	0.0390346	OTTHUMG00000132665.7	ASDURF	HGNC:53619
ENSG00000279026.1	47.4412	-0.587776	0.369224	0.00709994	0.0394077	OTTHUMG00000172970.1	AC005225.4
ENSG00000160401.15	30.1226	-0.664199	0.465516	0.00719318	0.0398163	OTTHUMG00000020709.5	CFAP157	HGNC:27843
ENSG00000137747.16	27.1264	-0.666003	0.465699	0.00726242	0.0400903	OTTHUMG00000166992.3	TMPRSS13	HGNC:29808
ENSG00000197044.11	30.2871	0.601251	0.392596	0.00737068	0.0405532	OTTHUMG00000154449.5	ZNF441	HGNC:20875
ENSG00000251580.3	28.9859	-0.658294	0.465765	0.0074781	0.040996	OTTHUMG00000162381.7	LINC02482	HGNC:53458
ENSG00000269439.6	26.0406	-0.629239	0.441981	0.00790564	0.0427246	OTTHUMG00000182861.3	AC010618.3
ENSG00000136867.11	39.044	-0.630373	0.471572	0.00835054	0.0444973	OTTHUMG00000021037.3	SLC31A2	HGNC:11017
ENSG00000257178.5	17.3024	0.730296	0.64406	0.00862578	0.0456709	OTTHUMG00000170223.1	AC103702.1
ENSG00000261147.1	27.8344	0.654833	0.504524	0.00882832	0.0464605	OTTHUMG00000177211.1	AC091167.2
ENSG00000272871.1	15.908	-0.757795	0.8821	0.0088314	0.0464634	OTTHUMG00000185911.1	AL159169.2
ENSG00000240137.6	26.9106	-0.630544	0.482256	0.00893997	0.0468995	OTTHUMG00000159845.3	ERICH6-AS1	HGNC:41205
ENSG00000237886.1	17.7497	-0.742057	0.930769	0.00904611	0.0472325	OTTHUMG00000020933.1	NALT1	HGNC:51192
ENSG00000223561.7	20.4449	0.667778	0.552973	0.00914877	0.0476665	OTTHUMG00000152594.27	AC005165.1
ENSG00000125851.10	18.1764	-0.705412	0.680385	0.00916249	0.0477108	OTTHUMG00000031941.6	PCSK2	HGNC:8744
ENSG00000206384.10	28.9179	0.599304	0.448073	0.00922235	0.0479814	OTTHUMG00000159653.6	COL6A6	HGNC:27023
ENSG00000244270.1	14.7115	-0.72007	1.34294	0.00923133	0.0480008	OTTHUMG00000158047.1	RPL32P29	HGNC:35771
ENSG00000072201.14	31.11	-0.635634	0.526022	0.00924198	0.0480152	OTTHUMG00000102099.5	LNX1	HGNC:6657
ENSG00000278156.2	13.8932	0.730793	0.772528	0.00935239	0.0484648	OTTHUMG00000187411.2	TSC22D1-AS1	HGNC:43684
ENSG00000100385.14	20.5898	0.657536	0.582343	0.00956466	0.0493131	OTTHUMG00000150534.4	IL2RB	HGNC:6009

## Sheet: DCP1bKO_WT
Supplementary File 1b. Differentially Expressed Genes Identified by Comparing Transcriptomes between DCP1b Knockout and Wild Type Samples
geneID	baseMean	log2FoldChange	lfcSE	pvalue	padj	havana_gene	gene_name	hgnc_id
ENSG00000253898.1	623.531	3.64756	0.133703	3.26972e-165	5.97444e-161	OTTHUMG00000164609.1	LINC01419	HGNC:50712
ENSG00000185247.15	329.774	6.8276	0.291353	4.12679e-121	3.77024e-117	OTTHUMG00000022633.6	MAGEA11	HGNC:6798
ENSG00000169093.16	1049.78	-2.01902	0.110967	4.20482e-75	2.56101e-71	OTTHUMG00000021057.2	ASMTL	HGNC:751
ENSG00000068078.18	2045.49	-1.29815	0.0758052	5.7137e-67	2.61002e-63	OTTHUMG00000121148.7	FGFR3	HGNC:3690
ENSG00000142173.16	2713.76	-1.39662	0.102145	9.37771e-44	3.42699e-40	OTTHUMG00000090489.8	COL6A2	HGNC:2212
ENSG00000120694.20	5695.84	0.816945	0.0597002	1.16741e-43	3.55517e-40	OTTHUMG00000016685.6	HSPH1	HGNC:16969
ENSG00000173531.15	369.168	-1.93768	0.14571	9.94641e-42	2.5963e-38	OTTHUMG00000155918.6	MST1	HGNC:7380
ENSG00000142102.16	1836.71	-1.22712	0.0929079	5.86612e-41	1.33982e-37	OTTHUMG00000153218.5	PGGHG	HGNC:26210
ENSG00000233922.3	233.826	-2.30298	0.181012	1.4968e-38	3.03883e-35	OTTHUMG00000090408.4	LINC01694	HGNC:52481
ENSG00000266714.9	497.019	-1.82193	0.148348	7.33887e-36	1.34096e-32	OTTHUMG00000179794.10	MYO15B	HGNC:14083
ENSG00000114054.14	2016.79	-0.933515	0.0761502	1.30127e-35	2.16153e-32	OTTHUMG00000159792.5	PCCB	HGNC:8654
ENSG00000013573.17	3937.77	-0.817634	0.0668888	2.32887e-35	3.54609e-32	OTTHUMG00000168435.7	DDX11	HGNC:2736
ENSG00000171246.6	1737.36	1.03757	0.0855591	7.26005e-35	1.02043e-31	OTTHUMG00000177607.2	NPTX1	HGNC:7952
ENSG00000115267.8	170.811	2.32314	0.194175	3.23361e-34	4.22032e-31	OTTHUMG00000132055.7	IFIH1	HGNC:18873
ENSG00000108039.18	3081.79	-0.967883	0.0816562	1.84821e-33	2.25137e-30	OTTHUMG00000019029.5	XPNPEP1	HGNC:12822
ENSG00000251381.8	51.6241	4.52455	0.391009	1.25194e-31	1.42972e-28	OTTHUMG00000165904.16	LINC00958	HGNC:48671
ENSG00000186998.16	251.782	-1.64878	0.143741	1.45709e-31	1.56612e-28	OTTHUMG00000151013.9	EMID1	HGNC:18036
ENSG00000174460.4	1390.39	1.34371	0.118386	5.21208e-31	5.29084e-28	OTTHUMG00000022261.2	ZCCHC12	HGNC:27273
ENSG00000151640.13	1060.53	-1.28467	0.113179	5.50784e-31	5.2968e-28	OTTHUMG00000019283.3	DPYSL4	HGNC:3016
ENSG00000079215.14	1158.65	1.19424	0.105496	8.16361e-31	7.45828e-28	OTTHUMG00000090793.4	SLC1A3	HGNC:10941
ENSG00000163430.12	3044.7	-0.888413	0.0818724	1.91045e-28	1.66228e-25	OTTHUMG00000159440.3	FSTL1	HGNC:3972
ENSG00000120437.9	2051.52	1.18137	0.112304	4.18947e-27	3.47954e-24	OTTHUMG00000015935.2	ACAT2	HGNC:94
ENSG00000050555.18	486.516	-1.51176	0.14466	8.47589e-27	6.45298e-24	OTTHUMG00000020819.5	LAMC3	HGNC:6494
ENSG00000113108.19	614.083	-1.18012	0.112864	8.30413e-27	6.45298e-24	OTTHUMG00000191657.1	APBB3	HGNC:20708
ENSG00000075043.18	851.972	-1.31192	0.127706	6.95295e-26	5.08177e-23	OTTHUMG00000033049.15	KCNQ2	HGNC:6296
ENSG00000131067.17	1094.27	-0.838101	0.0817376	1.21407e-25	8.53214e-23	OTTHUMG00000032314.8	GGT7	HGNC:4259
ENSG00000042429.12	1210.46	0.942476	0.0923959	1.92909e-25	1.3055e-22	OTTHUMG00000167497.6	MED17	HGNC:2375
ENSG00000004777.18	401.7	-1.12663	0.111556	4.52276e-25	2.95143e-22	OTTHUMG00000182071.4	ARHGAP33	HGNC:23085
ENSG00000198843.13	1661.79	0.825002	0.0814847	5.22867e-25	3.25244e-22	OTTHUMG00000159825.4	SELENOT	HGNC:18136
ENSG00000204103.4	483.243	-1.43193	0.142442	5.34004e-25	3.25244e-22	OTTHUMG00000033052.3	MAFB	HGNC:6408
ENSG00000100979.15	605.385	-1.12669	0.111676	5.64246e-25	3.32578e-22	OTTHUMG00000033047.5	PLTP	HGNC:9093
ENSG00000117245.12	604.621	-1.23781	0.123452	7.11972e-25	4.06536e-22	OTTHUMG00000002863.3	KIF17	HGNC:19167
ENSG00000105373.19	6810.12	-1.06202	0.106297	1.13023e-24	6.25803e-22	OTTHUMG00000183059.2	NOP53	HGNC:4333
ENSG00000074181.9	1207.02	-1.42634	0.143494	1.86223e-24	1.00078e-21	OTTHUMG00000183217.4	NOTCH3	HGNC:7883
ENSG00000130829.18	975.041	-1.02569	0.103239	2.70737e-24	1.4134e-21	OTTHUMG00000024211.7	DUSP9	HGNC:3076
ENSG00000173482.16	438.992	-1.24659	0.125982	2.9632e-24	1.50399e-21	OTTHUMG00000131575.5	PTPRM	HGNC:9675
ENSG00000086061.16	6176.93	0.948812	0.0964262	7.20789e-24	3.55953e-21	OTTHUMG00000019760.2	DNAJA1	HGNC:5229
ENSG00000150687.12	907.846	1.01145	0.103611	1.40168e-23	6.73988e-21	OTTHUMG00000167226.4	PRSS23	HGNC:14370
ENSG00000006007.12	2241.25	0.718795	0.0733821	1.55983e-23	7.30801e-21	OTTHUMG00000131454.7	GDE1	HGNC:29644
ENSG00000181085.15	259.167	-1.45275	0.149272	1.65534e-23	7.56158e-21	OTTHUMG00000146450.4	MAPK15	HGNC:24667
ENSG00000134243.12	1734.06	0.75324	0.0773787	2.68784e-23	1.19786e-20	OTTHUMG00000011999.5	SORT1	HGNC:11186
ENSG00000205413.8	257.671	1.57611	0.163811	4.16083e-23	1.81016e-20	OTTHUMG00000155809.4	SAMD9	HGNC:1348
ENSG00000240303.8	2077.96	-0.763876	0.0794858	5.89263e-23	2.50396e-20	OTTHUMG00000159780.6	ACAD11	HGNC:30211
ENSG00000129103.18	2953.73	-0.704231	0.0730263	6.73784e-23	2.79804e-20	OTTHUMG00000129373.10	SUMF2	HGNC:20415
ENSG00000170275.15	4350.16	-0.731991	0.0760768	7.59941e-23	3.0857e-20	OTTHUMG00000130746.4	CRTAP	HGNC:2379
ENSG00000087116.16	377.059	-1.52177	0.161649	3.16105e-22	1.25562e-19	OTTHUMG00000130915.7	ADAMTS2	HGNC:218
ENSG00000060138.13	11239.4	-0.814231	0.0864489	4.62658e-22	1.79866e-19	OTTHUMG00000168409.5	YBX3	HGNC:2428
ENSG00000107796.13	505.263	-1.27803	0.136275	5.53772e-22	2.09996e-19	OTTHUMG00000018700.2	ACTA2	HGNC:130
ENSG00000189343.7	150.106	-1.79863	0.19187	5.63147e-22	2.09996e-19	OTTHUMG00000178199.1	RPS2P46	HGNC:35839
ENSG00000160323.18	483.422	-1.07172	0.114787	7.70812e-22	2.81685e-19	OTTHUMG00000020876.4	ADAMTS13	HGNC:1366
ENSG00000236552.2	360.45	-1.71134	0.183642	8.13258e-22	2.9137e-19	OTTHUMG00000018837.1	RPL13AP5	HGNC:23736
ENSG00000112972.15	2072.12	0.816051	0.0870956	9.79655e-22	3.44236e-19	OTTHUMG00000162231.3	HMGCS1	HGNC:5007
ENSG00000010322.16	4291.47	-0.801871	0.0858142	1.02026e-21	3.51739e-19	OTTHUMG00000158571.3	NISCH	HGNC:18006
ENSG00000271270.7	1072.6	-0.826862	0.0887067	1.24673e-21	4.21855e-19	OTTHUMG00000185164.4	TMCC1-AS1	HGNC:49060
ENSG00000215021.9	8276.66	-0.900288	0.0972102	1.79308e-21	5.95694e-19	OTTHUMG00000168519.5	PHB2	HGNC:30306
ENSG00000105486.14	3422.13	-0.846371	0.0914194	2.25026e-21	7.34229e-19	OTTHUMG00000183187.3	LIG1	HGNC:6598
ENSG00000129951.18	384.095	-1.48209	0.161558	3.49056e-21	1.11894e-18	OTTHUMG00000164523.7	PLPPR3	HGNC:23497
ENSG00000177283.7	747.861	-0.949023	0.103677	5.01894e-21	1.58114e-18	OTTHUMG00000017956.2	FZD8	HGNC:4046
ENSG00000147202.18	900.89	-0.915371	0.100159	5.97847e-21	1.8515e-18	OTTHUMG00000022689.3	DIAPH2	HGNC:2877
ENSG00000077150.20	1165.31	-1.00394	0.110072	6.47289e-21	1.97121e-18	OTTHUMG00000018962.6	NFKB2	HGNC:7795
ENSG00000116353.16	1213.22	-0.785154	0.085882	7.49851e-21	2.24611e-18	OTTHUMG00000059082.5	MECR	HGNC:19691
ENSG00000163864.17	68.3875	-2.94475	0.32289	8.17778e-21	2.41007e-18	OTTHUMG00000159951.5	NMNAT3	HGNC:20989
ENSG00000185189.18	1023.87	-1.13408	0.125033	8.6015e-21	2.49471e-18	OTTHUMG00000165157.3	NRBP2	HGNC:19339
ENSG00000036257.13	2615.02	0.599392	0.0658826	1.66753e-20	4.68756e-18	OTTHUMG00000133167.6	CUL3	HGNC:2553
ENSG00000125534.10	3074.45	-1.47315	0.164625	2.42103e-20	6.70259e-18	OTTHUMG00000032978.2	PPDPF	HGNC:16142
ENSG00000144043.12	3388.83	0.722662	0.0802361	3.20207e-20	8.73258e-18	OTTHUMG00000170601.2	TEX261	HGNC:30712
ENSG00000184205.14	3017.04	0.936691	0.105005	4.50143e-20	1.20956e-17	OTTHUMG00000021597.4	TSPYL2	HGNC:24358
ENSG00000246705.4	117.811	-7.60818	0.812775	4.86088e-20	1.28722e-17	OTTHUMG00000168736.2	H2AJ	HGNC:14456
ENSG00000010295.19	990.77	-0.779448	0.0873939	5.51988e-20	1.44085e-17	OTTHUMG00000141264.3	IFFO1	HGNC:24970
ENSG00000186834.3	1880.91	0.996884	0.112265	6.42466e-20	1.6534e-17	OTTHUMG00000180112.2	HEXIM1	HGNC:24953
ENSG00000148600.15	447.84	-1.06515	0.12017	6.69163e-20	1.69819e-17	OTTHUMG00000018634.3	CDHR1	HGNC:14550
ENSG00000163913.11	819.771	-0.877613	0.0989096	6.98051e-20	1.74723e-17	OTTHUMG00000159516.13	IFT122	HGNC:13556
ENSG00000244486.8	1443.99	-1.14665	0.129901	8.50106e-20	2.09907e-17	OTTHUMG00000150779.5	SCARF2	HGNC:19869
ENSG00000110172.12	2497.63	1.14502	0.130909	1.53931e-19	3.75016e-17	OTTHUMG00000167305.4	CHORDC1	HGNC:14525
ENSG00000092098.17	1069.41	-0.764638	0.0872578	2.35105e-19	5.65241e-17	OTTHUMG00000028798.11	RNF31	HGNC:16031
ENSG00000175061.18	9076.45	-0.759317	0.0868876	3.51774e-19	8.34754e-17	OTTHUMG00000058990.25	SNHG29	HGNC:28619
ENSG00000111667.13	2875.34	-0.650401	0.0743373	3.57417e-19	8.37272e-17	OTTHUMG00000169233.2	USP5	HGNC:12628
ENSG00000067066.17	32.0684	4.40834	0.502679	3.62437e-19	8.38284e-17	OTTHUMG00000133203.18	SP100	HGNC:11206
ENSG00000197582.5	77.0057	-2.89593	0.332495	3.87784e-19	8.85699e-17	OTTHUMG00000021150.1	GPX1P1	HGNC:4560
ENSG00000157833.13	583.786	-1.19688	0.138299	4.15122e-19	9.36434e-17	OTTHUMG00000151935.3	GAREM2	HGNC:27172
ENSG00000145882.11	994.194	-0.947305	0.109458	4.43156e-19	9.87482e-17	OTTHUMG00000130052.5	PCYOX1L	HGNC:28477
ENSG00000196155.13	1289.61	-1.0468	0.121223	4.73119e-19	1.04155e-16	OTTHUMG00000172936.4	AC040160.1
ENSG00000198682.13	895.661	-0.8727	0.101176	5.98596e-19	1.30209e-16	OTTHUMG00000018683.3	PAPSS2	HGNC:8604
ENSG00000162004.17	340.972	-0.993034	0.115441	6.38241e-19	1.37199e-16	OTTHUMG00000121176.7	CCDC78	HGNC:14153
ENSG00000135899.17	150.282	1.47637	0.172024	6.9154e-19	1.46928e-16	OTTHUMG00000133204.6	SP110	HGNC:5401
ENSG00000214106.9	221.353	1.1734	0.13665	7.09151e-19	1.48938e-16	OTTHUMG00000151324.5	PAXIP1-AS2	HGNC:48958
ENSG00000105088.8	271.508	-1.30985	0.152691	7.51031e-19	1.55941e-16	OTTHUMG00000180390.2	OLFM2	HGNC:17189
ENSG00000143878.10	4312.24	-0.630768	0.0737409	1.73004e-18	3.55184e-16	OTTHUMG00000090755.4	RHOB	HGNC:668
ENSG00000198915.11	412.129	-1.23921	0.147087	2.43012e-18	4.93369e-16	OTTHUMG00000018025.6	RASGEF1A	HGNC:24246
ENSG00000167549.18	595.506	-1.13271	0.134292	2.59385e-18	5.20823e-16	OTTHUMG00000132732.4	CORO6	HGNC:21356
ENSG00000119333.11	1801.75	-0.778567	0.0920147	3.21712e-18	6.38947e-16	OTTHUMG00000020750.2	WDR34	HGNC:28296
ENSG00000264112.1	1695.18	-1.23571	0.147324	3.75419e-18	7.37598e-16	OTTHUMG00000178780.1	AC015813.1
ENSG00000158805.12	1814.73	0.990011	0.11794	4.06061e-18	7.89313e-16	OTTHUMG00000138050.4	ZNF276	HGNC:23330
ENSG00000128918.15	1656.96	0.808167	0.0960367	4.43848e-18	8.53684e-16	OTTHUMG00000132624.6	ALDH1A2	HGNC:15472
ENSG00000244560.7	188.129	-1.37971	0.166358	8.10441e-18	1.54254e-15	OTTHUMG00000155009.5	AC004890.2
ENSG00000004399.12	1413.15	-1.25462	0.152257	1.21741e-17	2.26984e-15	OTTHUMG00000159547.15	PLXND1	HGNC:9107
ENSG00000283189.2	213.909	-1.42857	0.173582	1.21034e-17	2.26984e-15	OTTHUMG00000191676.4	AC104452.1
ENSG00000119977.21	1409.07	-0.651098	0.0783616	1.45093e-17	2.67792e-15	OTTHUMG00000018814.7	TCTN3	HGNC:24519
ENSG00000198900.6	5777.08	0.621505	0.0747184	1.55662e-17	2.84425e-15	OTTHUMG00000033057.3	TOP1	HGNC:11986
ENSG00000184515.11	117.325	-2.36664	0.289638	1.59749e-17	2.89003e-15	OTTHUMG00000022049.2	BEX5	HGNC:27990
ENSG00000054983.17	62.0965	-2.01344	0.245852	1.98257e-17	3.52767e-15	OTTHUMG00000028646.4	GALC	HGNC:4115
ENSG00000215114.9	1314.48	0.652427	0.0785502	1.98856e-17	3.52767e-15	OTTHUMG00000164300.2	UBXN2B	HGNC:27035
ENSG00000111752.11	1581.77	-1.00797	0.122941	2.07336e-17	3.64274e-15	OTTHUMG00000168275.3	PHC1	HGNC:3182
ENSG00000135414.10	1109.45	0.730092	0.0887447	2.58687e-17	4.50164e-15	OTTHUMG00000170188.5	GDF11	HGNC:4216
ENSG00000123453.18	133.484	-1.87966	0.23214	3.04506e-17	5.249e-15	OTTHUMG00000020879.6	SARDH	HGNC:10536
ENSG00000119514.7	494.136	-0.908587	0.111502	3.50886e-17	5.93647e-15	OTTHUMG00000020348.3	GALNT12	HGNC:19877
ENSG00000243679.1	180.211	-1.38115	0.170667	4.14506e-17	6.88533e-15	OTTHUMG00000158228.1	AC018638.5
ENSG00000259803.7	105.935	-2.04461	0.251757	4.11364e-17	6.88533e-15	OTTHUMG00000175615.4	SLC22A31	HGNC:27091
ENSG00000162591.16	205.677	-1.23144	0.152536	4.80341e-17	7.90701e-15	OTTHUMG00000000611.8	MEGF6	HGNC:3232
ENSG00000165449.11	490.873	-1.16865	0.144797	5.7903e-17	9.44647e-15	OTTHUMG00000018283.4	SLC16A9	HGNC:23520
ENSG00000156711.17	119.182	1.44158	0.179877	7.39081e-17	1.19509e-14	OTTHUMG00000014587.2	MAPK13	HGNC:6875
ENSG00000026025.16	35017.1	-0.938295	0.117714	7.54465e-17	1.20926e-14	OTTHUMG00000017744.6	VIM	HGNC:12692
ENSG00000072832.15	982.853	-1.0862	0.135589	7.96774e-17	1.26597e-14	OTTHUMG00000125489.3	CRMP1	HGNC:2365
ENSG00000285053.1	464.819	0.887074	0.110196	9.39121e-17	1.47928e-14	OTTHUMG00000192486.7	TBCE	HGNC:11582
ENSG00000179314.14	598.245	0.79512	0.0992969	1.38581e-16	2.16424e-14	OTTHUMG00000177794.6	WSCD1	HGNC:29060
ENSG00000036448.10	503.45	0.869184	0.108684	1.40393e-16	2.17396e-14	OTTHUMG00000129175.8	MYOM2	HGNC:7614
ENSG00000121753.12	1134.19	-0.838498	0.105172	1.60774e-16	2.44806e-14	OTTHUMG00000003885.6	ADGRB2	HGNC:944
ENSG00000008952.17	3083.52	0.684609	0.085488	1.70801e-16	2.57924e-14	OTTHUMG00000158753.5	SEC62	HGNC:11846
ENSG00000100316.16	59932.4	-0.907916	0.114148	1.73215e-16	2.59425e-14	OTTHUMG00000151079.10	RPL3	HGNC:10332
ENSG00000164070.12	2209.72	0.640049	0.0799558	1.91384e-16	2.84307e-14	OTTHUMG00000133302.5	HSPA4L	HGNC:17041
ENSG00000161996.19	1360.64	-0.961972	0.12131	1.98139e-16	2.91967e-14	OTTHUMG00000048040.6	WDR90	HGNC:26960
ENSG00000129038.16	325.98	-1.05226	0.133082	2.09564e-16	3.06333e-14	OTTHUMG00000137595.5	LOXL1	HGNC:6665
ENSG00000132002.8	2225.38	0.685152	0.0858622	2.14026e-16	3.10372e-14	OTTHUMG00000183289.4	DNAJB1	HGNC:5270
ENSG00000090097.21	536.695	-0.883833	0.111527	2.16273e-16	3.11161e-14	OTTHUMG00000157366.34	PCBP4	HGNC:8652
ENSG00000072042.13	2447.07	0.753664	0.0947277	2.23764e-16	3.17536e-14	OTTHUMG00000171196.7	RDH11	HGNC:17964
ENSG00000134668.12	139.875	-1.46126	0.185333	2.2418e-16	3.17536e-14	OTTHUMG00000003879.6	SPOCD1	HGNC:26338
ENSG00000064115.11	1168.19	-0.674222	0.0846145	2.35162e-16	3.30529e-14	OTTHUMG00000169243.9	TM7SF3	HGNC:23049
ENSG00000237452.2	65.4518	-2.17806	0.278027	2.44273e-16	3.40715e-14	OTTHUMG00000156178.3	BHMG1	HGNC:44318
ENSG00000101347.9	1676.11	0.657164	0.0825709	2.69276e-16	3.72743e-14	OTTHUMG00000032402.6	SAMHD1	HGNC:15925
ENSG00000158062.20	1148.57	-0.749746	0.0950783	3.0331e-16	4.16697e-14	OTTHUMG00000003382.13	UBXN11	HGNC:30600
ENSG00000144712.12	731.516	-0.699321	0.0883786	3.26228e-16	4.44839e-14	OTTHUMG00000155397.6	CAND2	HGNC:30689
ENSG00000184381.20	723.485	-0.93045	0.118204	3.30243e-16	4.46978e-14	OTTHUMG00000151246.10	PLA2G6	HGNC:9039
ENSG00000006282.21	1109.34	-0.852342	0.108096	3.36679e-16	4.52338e-14	OTTHUMG00000162162.5	SPATA20	HGNC:26125
ENSG00000141959.17	5951.7	-0.732505	0.0928191	3.64775e-16	4.86508e-14	OTTHUMG00000086910.3	PFKL	HGNC:8876
ENSG00000099622.14	6012.55	-0.721679	0.09158	4.2645e-16	5.64645e-14	OTTHUMG00000180145.11	CIRBP	HGNC:1982
ENSG00000127328.21	799.105	0.910286	0.116175	4.67938e-16	6.15119e-14	OTTHUMG00000169437.2	RAB3IP	HGNC:16508
ENSG00000174469.23	1195.54	0.833944	0.106337	4.78616e-16	6.24662e-14	OTTHUMG00000152743.11	CNTNAP2	HGNC:13830
ENSG00000100916.14	750.08	0.894106	0.114816	6.56081e-16	8.47257e-14	OTTHUMG00000170559.4	BRMS1L	HGNC:20512
ENSG00000178104.19	2351.86	0.622564	0.0792278	6.58442e-16	8.47257e-14	OTTHUMG00000013846.16	PDE4DIP	HGNC:15580
ENSG00000110628.16	123.342	-1.59137	0.205501	7.3425e-16	9.38197e-14	OTTHUMG00000010037.13	SLC22A18	HGNC:10964
ENSG00000010626.15	150.223	-1.46757	0.190138	7.53066e-16	9.55557e-14	OTTHUMG00000156668.5	LRRC23	HGNC:19138
ENSG00000250722.6	250.23	1.28193	0.166565	9.63004e-16	1.21352e-13	OTTHUMG00000162140.5	SELENOP	HGNC:10751
ENSG00000163611.11	460.237	-1.2261	0.159584	1.09466e-15	1.36997e-13	OTTHUMG00000159261.17	SPICE1	HGNC:25083
ENSG00000142733.17	740.684	-0.996961	0.129421	1.18914e-15	1.47809e-13	OTTHUMG00000004631.11	MAP3K6	HGNC:6858
ENSG00000215375.6	270.574	-1.22101	0.158893	1.24618e-15	1.53853e-13	OTTHUMG00000159971.3	MYL5	HGNC:7586
ENSG00000102032.13	191.601	-1.69439	0.221666	1.38271e-15	1.69563e-13	OTTHUMG00000024224.10	RENBP	HGNC:9959
ENSG00000169992.10	2745.2	-0.691957	0.0894329	1.41652e-15	1.72551e-13	OTTHUMG00000108138.4	NLGN2	HGNC:14290
ENSG00000187961.14	736.336	-1.08131	0.141182	1.51568e-15	1.83407e-13	OTTHUMG00000040721.8	KLHL17	HGNC:24023
ENSG00000160801.14	114.902	-1.74769	0.229075	1.53768e-15	1.84845e-13	OTTHUMG00000133515.6	PTH1R	HGNC:9608
ENSG00000070081.17	2463.45	0.781935	0.101737	1.7026e-15	2.03333e-13	OTTHUMG00000166050.8	NUCB2	HGNC:8044
ENSG00000007384.15	408.953	-0.999168	0.130662	1.87756e-15	2.22771e-13	OTTHUMG00000060719.15	RHBDF1	HGNC:20561
ENSG00000113369.9	403.829	-1.36582	0.180316	2.06977e-15	2.43993e-13	OTTHUMG00000162616.3	ARRDC3	HGNC:29263
ENSG00000130751.10	509.421	-0.966073	0.126481	2.11609e-15	2.47854e-13	OTTHUMG00000183440.2	NPAS1	HGNC:7894
ENSG00000169045.17	31624.8	0.757948	0.0997973	2.45494e-15	2.85711e-13	OTTHUMG00000130908.43	HNRNPH1	HGNC:5041
ENSG00000186862.20	330.08	-1.05969	0.139384	2.58618e-15	2.9908e-13	OTTHUMG00000018916.7	PDZD7	HGNC:26257
ENSG00000067840.12	786.288	-0.922689	0.121568	3.05654e-15	3.49057e-13	OTTHUMG00000024209.4	PDZD4	HGNC:21167
ENSG00000169116.11	562.48	0.90995	0.119944	3.15127e-15	3.5764e-13	OTTHUMG00000160827.1	PARM1	HGNC:24536
ENSG00000080824.18	73499.7	0.624405	0.0816156	3.32596e-15	3.75135e-13	OTTHUMG00000171752.7	HSP90AA1	HGNC:5253
ENSG00000206503.13	2116.24	-1.11409	0.147581	3.42007e-15	3.81092e-13	OTTHUMG00000130501.3	HLA-A	HGNC:4931
ENSG00000177706.9	295.374	-1.28619	0.170275	3.45369e-15	3.8246e-13	OTTHUMG00000151401.5	FAM20C	HGNC:22140
ENSG00000122359.18	3292.53	-0.587352	0.0767327	3.5935e-15	3.93176e-13	OTTHUMG00000018604.4	ANXA11	HGNC:535
ENSG00000162976.13	127.936	-1.6833	0.22494	3.92221e-15	4.26587e-13	OTTHUMG00000119055.6	SLC66A3	HGNC:28503
ENSG00000166033.13	1017.43	-0.921666	0.122201	4.49919e-15	4.86445e-13	OTTHUMG00000019186.4	HTRA1	HGNC:9476
ENSG00000013441.16	1109.26	0.816935	0.108114	4.75166e-15	5.1072e-13	OTTHUMG00000132784.4	CLK1	HGNC:2068
ENSG00000140598.15	1317.28	0.587614	0.0772547	5.18912e-15	5.54477e-13	OTTHUMG00000172573.5	EFL1	HGNC:25789
ENSG00000146094.14	196.129	1.52407	0.204208	5.63941e-15	5.99089e-13	OTTHUMG00000130850.7	DOK3	HGNC:24583
ENSG00000111652.10	1669.15	-0.751117	0.0995197	5.76896e-15	6.09309e-13	OTTHUMG00000169182.4	COPS7A	HGNC:16758
ENSG00000259316.11	61.233	-3.01712	0.409561	6.45821e-15	6.78187e-13	OTTHUMG00000172470.9	AC087632.2
ENSG00000125967.16	553.824	-0.856993	0.114386	6.94954e-15	7.23129e-13	OTTHUMG00000032264.7	NECAB3	HGNC:15851
ENSG00000196189.13	219.57	-1.1512	0.154382	6.96534e-15	7.23129e-13	OTTHUMG00000014042.5	SEMA4A	HGNC:10729
ENSG00000250899.3	297.592	0.886537	0.118347	7.35389e-15	7.59155e-13	OTTHUMG00000168179.2	AC125807.2
ENSG00000166169.17	1155.74	-0.62492	0.0828195	7.74278e-15	7.94809e-13	OTTHUMG00000018933.5	POLL	HGNC:9184
ENSG00000130035.8	71.7045	-2.58017	0.349117	9.07682e-15	9.21398e-13	OTTHUMG00000166188.6	GALNT8	HGNC:4130
ENSG00000136999.5	58.3647	1.97602	0.267102	9.04715e-15	9.21398e-13	OTTHUMG00000164984.2	CCN3	HGNC:7885
ENSG00000107829.15	1032.17	-0.750986	0.100468	9.90529e-15	9.99942e-13	OTTHUMG00000018938.6	FBXW4	HGNC:10847
ENSG00000114779.19	1880.9	-0.748445	0.100234	1.05286e-14	1.05702e-12	OTTHUMG00000157816.25	ABHD14B	HGNC:28235
ENSG00000158186.13	960.305	-0.601372	0.0801284	1.12527e-14	1.12355e-12	OTTHUMG00000159888.4	MRAS	HGNC:7227
ENSG00000166454.10	1341.66	0.589609	0.0786284	1.17069e-14	1.16254e-12	OTTHUMG00000176469.5	ATMIN	HGNC:29034
ENSG00000125772.14	834.483	-1.2085	0.164212	1.25101e-14	1.23559e-12	OTTHUMG00000031806.5	GPCPD1	HGNC:26957
ENSG00000115556.14	146.567	1.24992	0.16948	1.26037e-14	1.23815e-12	OTTHUMG00000154743.4	PLCD4	HGNC:9062
ENSG00000101773.19	3586.79	0.684618	0.0919416	1.37923e-14	1.34766e-12	OTTHUMG00000131769.7	RBBP8	HGNC:9891
ENSG00000160867.15	548.623	-0.920994	0.124562	1.44031e-14	1.39985e-12	OTTHUMG00000151523.6	FGFR4	HGNC:3691
ENSG00000172663.9	417.025	-0.955333	0.12957	1.48561e-14	1.43625e-12	OTTHUMG00000168034.5	TMEM134	HGNC:26142
ENSG00000188290.10	2982.22	-1.31075	0.178815	1.55096e-14	1.49154e-12	OTTHUMG00000040758.2	HES4	HGNC:24149
ENSG00000182871.16	2655.15	-0.843863	0.114585	1.90228e-14	1.81034e-12	OTTHUMG00000090407.6	COL18A1	HGNC:2195
ENSG00000215030.5	108.119	-2.66388	0.362742	2.23603e-14	2.11693e-12	OTTHUMG00000059294.2	RPL13P12	HGNC:35701
ENSG00000135722.9	224.778	-1.24227	0.170421	2.31403e-14	2.17949e-12	OTTHUMG00000137514.5	FBXL8	HGNC:17875
ENSG00000142621.19	718.84	0.80949	0.110365	2.50734e-14	2.34945e-12	OTTHUMG00000002088.11	FHAD1	HGNC:29408
ENSG00000171798.18	169.27	-1.4513	0.200083	2.56547e-14	2.39165e-12	OTTHUMG00000019303.7	KNDC1	HGNC:29374
ENSG00000204172.12	1254.76	-0.735454	0.100229	2.62028e-14	2.43035e-12	OTTHUMG00000018115.3	AGAP9	HGNC:23463
ENSG00000141577.14	2195.82	-0.613552	0.0831648	2.63448e-14	2.43118e-12	OTTHUMG00000132728.5	CEP131	HGNC:29511
ENSG00000160963.14	244.34	-1.28501	0.176669	2.73029e-14	2.50692e-12	OTTHUMG00000150033.6	COL26A1	HGNC:18038
ENSG00000005206.17	1671.21	-0.722899	0.0985	2.83105e-14	2.58645e-12	OTTHUMG00000180443.10	SPPL2B	HGNC:30627
ENSG00000162623.16	1104.63	0.608801	0.0826114	2.85557e-14	2.59587e-12	OTTHUMG00000009641.6	TYW3	HGNC:24757
ENSG00000147050.14	1587.06	0.929943	0.128415	4.18175e-14	3.76399e-12	OTTHUMG00000021402.2	KDM6A	HGNC:12637
ENSG00000260238.6	180.373	1.30866	0.18187	4.36462e-14	3.90933e-12	OTTHUMG00000014817.6	PMF1-BGLAP	HGNC:42953
ENSG00000213468.7	393.036	1.06266	0.147181	4.47248e-14	3.9864e-12	OTTHUMG00000022417.16	FIRRE	HGNC:49627
ENSG00000010292.13	6691.33	-0.63463	0.0871963	5.28961e-14	4.69183e-12	OTTHUMG00000168513.3	NCAPD2	HGNC:24305
ENSG00000159307.19	277.074	-1.11525	0.155482	5.60682e-14	4.94917e-12	OTTHUMG00000150679.6	SCUBE1	HGNC:13441
ENSG00000205593.12	118.254	-1.40695	0.197352	5.83644e-14	5.12709e-12	OTTHUMG00000150210.7	DENND6B	HGNC:32690
ENSG00000112031.16	1110.9	0.626437	0.0862845	5.99155e-14	5.21322e-12	OTTHUMG00000015857.4	MTRF1L	HGNC:21051
ENSG00000137700.18	1734.32	-0.670236	0.092463	6.07991e-14	5.26503e-12	OTTHUMG00000166352.5	SLC37A4	HGNC:4061
ENSG00000106772.18	282.666	0.973747	0.13561	6.32059e-14	5.44763e-12	OTTHUMG00000020047.5	PRUNE2	HGNC:25209
ENSG00000178149.17	555.04	-0.902012	0.125452	6.66912e-14	5.72104e-12	OTTHUMG00000156748.5	DALRD3	HGNC:25536
ENSG00000103381.12	385.342	0.834175	0.116127	7.21962e-14	6.16434e-12	OTTHUMG00000167711.4	CPPED1	HGNC:25632
ENSG00000107537.14	540.27	-0.913775	0.127516	7.36149e-14	6.25624e-12	OTTHUMG00000017693.11	PHYH	HGNC:8940
ENSG00000170113.16	599.532	0.687172	0.0955127	8.63947e-14	7.30835e-12	OTTHUMG00000129099.5	NIPA1	HGNC:17043
ENSG00000092068.20	616.518	0.694999	0.0968173	8.83509e-14	7.43939e-12	OTTHUMG00000028720.6	SLC7A8	HGNC:11066
ENSG00000178035.12	13663	-0.71503	0.0996783	9.58078e-14	8.03027e-12	OTTHUMG00000156771.3	IMPDH2	HGNC:6053
ENSG00000171084.15	112.526	-1.34181	0.18925	9.70671e-14	8.09868e-12	OTTHUMG00000159586.1	FAM86JP	HGNC:44097
ENSG00000101400.6	707.275	-0.892641	0.125291	1.09058e-13	9.05779e-12	OTTHUMG00000032259.3	SNTA1	HGNC:11167
ENSG00000173295.7	226.733	-1.20769	0.171131	1.10327e-13	9.12173e-12	OTTHUMG00000163669.6	FAM86B3P	HGNC:44371
ENSG00000154734.15	9178.17	1.16804	0.164793	1.12845e-13	9.28782e-12	OTTHUMG00000078688.5	ADAMTS1	HGNC:217
ENSG00000164062.13	2751.6	-0.846851	0.119077	1.18214e-13	9.68613e-12	OTTHUMG00000156882.5	APEH	HGNC:586
ENSG00000140284.11	270	1.15067	0.163045	1.28217e-13	1.04589e-11	OTTHUMG00000131643.3	SLC27A2	HGNC:10996
ENSG00000197587.11	333.99	-0.927332	0.130773	1.3712e-13	1.11353e-11	OTTHUMG00000007982.3	DMBX1	HGNC:19026
ENSG00000111199.11	137.554	-1.43854	0.205731	1.62257e-13	1.31184e-11	OTTHUMG00000169277.3	TRPV4	HGNC:18083
ENSG00000125520.14	1765.5	-1.00647	0.14348	2.02906e-13	1.63326e-11	OTTHUMG00000032997.4	SLC2A4RG	HGNC:15930
ENSG00000196776.16	915.297	-0.592616	0.0834298	2.10132e-13	1.68401e-11	OTTHUMG00000044216.4	CD47	HGNC:1682
ENSG00000114019.14	684.783	-0.763412	0.108304	2.26612e-13	1.80815e-11	OTTHUMG00000159777.7	AMOTL2	HGNC:17812
ENSG00000159164.10	1413.62	0.668805	0.094347	2.31583e-13	1.83978e-11	OTTHUMG00000012209.3	SV2A	HGNC:20566
ENSG00000106333.13	351.45	-1.16858	0.167524	2.36246e-13	1.86064e-11	OTTHUMG00000156675.2	PCOLCE	HGNC:8738
ENSG00000120645.12	53.0979	-2.21854	0.31823	2.4083e-13	1.88054e-11	OTTHUMG00000167975.5	IQSEC3	HGNC:29193
ENSG00000164877.19	220.126	-0.980673	0.140073	2.40522e-13	1.88054e-11	OTTHUMG00000119021.6	MICALL2	HGNC:29672
ENSG00000197444.10	959.267	-1.04495	0.149882	2.54286e-13	1.97716e-11	OTTHUMG00000018200.2	OGDHL	HGNC:25590
ENSG00000154134.15	907.366	-0.889596	0.127108	2.55668e-13	1.97947e-11	OTTHUMG00000165934.3	ROBO3	HGNC:13433
ENSG00000172037.14	2503.83	-0.838078	0.119714	2.67011e-13	2.05432e-11	OTTHUMG00000156807.5	LAMB2	HGNC:6487
ENSG00000131584.19	1444.35	-0.807594	0.115471	3.06142e-13	2.33076e-11	OTTHUMG00000002235.5	ACAP3	HGNC:16754
ENSG00000172460.17	405.514	-1.29864	0.187835	3.12447e-13	2.36889e-11	OTTHUMG00000191915.2	PRSS30P	HGNC:28753
ENSG00000185386.15	149.936	-1.22353	0.17632	3.18136e-13	2.40205e-11	OTTHUMG00000150226.2	MAPK11	HGNC:6873
ENSG00000110719.10	399.458	-0.869048	0.124659	3.31176e-13	2.49023e-11	OTTHUMG00000167358.6	TCIRG1	HGNC:11647
ENSG00000106628.10	5160.45	-0.636704	0.0907209	3.49985e-13	2.62087e-11	OTTHUMG00000022909.15	POLD2	HGNC:9176
ENSG00000164161.10	178.007	1.36154	0.197673	3.87254e-13	2.88812e-11	OTTHUMG00000161428.3	HHIP	HGNC:14866
ENSG00000160111.13	35.8992	-2.88625	0.417067	3.91231e-13	2.90593e-11	OTTHUMG00000133549.5	CPAMD8	HGNC:23228
ENSG00000148803.12	570.887	-1.22463	0.177587	3.99877e-13	2.95812e-11	OTTHUMG00000019315.4	FUOM	HGNC:24733
ENSG00000120913.23	395.998	-1.12612	0.163885	4.66704e-13	3.43856e-11	OTTHUMG00000164270.6	PDLIM2	HGNC:13992
ENSG00000163597.15	5559.81	-0.851882	0.123212	4.9045e-13	3.599e-11	OTTHUMG00000132201.6	SNHG16	HGNC:44352
ENSG00000085978.22	1053.49	0.641756	0.0921644	5.36977e-13	3.92466e-11	OTTHUMG00000133619.7	ATG16L1	HGNC:21498
ENSG00000143845.15	1037.95	-0.679401	0.0978975	5.51868e-13	4.01742e-11	OTTHUMG00000036061.7	ETNK2	HGNC:25575
ENSG00000102878.16	177.221	-1.03712	0.151231	5.67166e-13	4.1124e-11	OTTHUMG00000178325.2	HSF4	HGNC:5227
ENSG00000100726.15	2805.06	-0.765705	0.110803	5.71891e-13	4.11792e-11	OTTHUMG00000044471.8	TELO2	HGNC:29099
ENSG00000177595.18	1524.53	-0.852128	0.123671	5.72434e-13	4.11792e-11	OTTHUMG00000133306.4	PIDD1	HGNC:16491
ENSG00000130529.16	418.13	-1.11824	0.163231	5.8796e-13	4.21302e-11	OTTHUMG00000183184.7	TRPM4	HGNC:17993
ENSG00000144596.13	155.979	-1.42167	0.208509	6.12092e-13	4.36881e-11	OTTHUMG00000155544.7	GRIP2	HGNC:23841
ENSG00000111640.15	73230	-0.83377	0.121185	6.25839e-13	4.44954e-11	OTTHUMG00000137379.3	GAPDH	HGNC:4141
ENSG00000141232.5	1056.45	0.817212	0.118565	6.32752e-13	4.48126e-11	OTTHUMG00000162277.4	TOB1	HGNC:11979
ENSG00000188747.8	58.9266	-1.7461	0.257042	6.44714e-13	4.54835e-11	OTTHUMG00000131781.1	NOXA1	HGNC:10668
ENSG00000007516.13	201.147	-1.227	0.180072	6.81493e-13	4.78932e-11	OTTHUMG00000047833.5	BAIAP3	HGNC:948
ENSG00000134109.11	788.54	-0.862057	0.125766	7.02929e-13	4.92104e-11	OTTHUMG00000154896.4	EDEM1	HGNC:18967
ENSG00000065534.18	418.396	-1.23499	0.181817	7.26035e-13	5.0634e-11	OTTHUMG00000141304.13	MYLK	HGNC:7590
ENSG00000180353.11	58.3746	-1.90455	0.281692	7.44651e-13	5.15389e-11	OTTHUMG00000159409.3	HCLS1	HGNC:4844
ENSG00000130158.14	1221.42	-1.02535	0.150223	7.51376e-13	5.18081e-11	OTTHUMG00000180826.3	DOCK6	HGNC:19189
ENSG00000138385.16	10833.9	0.776857	0.112804	7.91865e-13	5.43946e-11	OTTHUMG00000132212.11	SSB	HGNC:11316
ENSG00000188130.14	1688.71	-0.684318	0.0994486	8.11383e-13	5.55266e-11	OTTHUMG00000030145.5	MAPK12	HGNC:6874
ENSG00000166432.15	87.7796	-1.88243	0.279872	8.28386e-13	5.64786e-11	OTTHUMG00000022044.4	ZMAT1	HGNC:29377
ENSG00000204178.11	1160.58	0.641414	0.0928463	8.58184e-13	5.80768e-11	OTTHUMG00000003473.6	MACO1	HGNC:25572
ENSG00000139112.11	1058.82	-0.699256	0.101909	8.6216e-13	5.81306e-11	OTTHUMG00000168411.10	GABARAPL1	HGNC:4068
ENSG00000163510.14	1808.54	0.636484	0.0926129	1.00483e-12	6.72537e-11	OTTHUMG00000154244.3	CWC22	HGNC:29322
ENSG00000155367.15	172.783	-1.10874	0.163903	1.03732e-12	6.89234e-11	OTTHUMG00000012019.5	PPM1J	HGNC:20785
ENSG00000065621.15	292.083	-0.905088	0.133009	1.07386e-12	7.10926e-11	OTTHUMG00000019006.5	GSTO2	HGNC:23064
ENSG00000267278.6	109.254	-1.2714	0.188849	1.1722e-12	7.73228e-11	OTTHUMG00000180362.4	MAP3K14-AS1	HGNC:44359
ENSG00000259112.2	26.8128	4.3092	0.633484	1.19647e-12	7.86398e-11	OTTHUMG00000171802.3	NDUFC2-KCTD14	HGNC:42956
ENSG00000124302.13	184.403	-1.1918	0.177315	1.22291e-12	8.00897e-11	OTTHUMG00000180472.8	CHST8	HGNC:15993
ENSG00000204228.4	184.78	-1.13119	0.168857	1.29981e-12	8.48218e-11	OTTHUMG00000031117.3	HSD17B8	HGNC:3554
ENSG00000107562.16	215.35	-8.11169	1.27829	1.33851e-12	8.64212e-11	OTTHUMG00000018054.2	CXCL12	HGNC:10672
ENSG00000167513.9	5307.54	-0.82158	0.121311	1.33142e-12	8.64212e-11	OTTHUMG00000173467.3	CDT1	HGNC:24576
ENSG00000120915.14	504.089	-0.792212	0.116965	1.35585e-12	8.70308e-11	OTTHUMG00000102115.7	EPHX2	HGNC:3402
ENSG00000069509.6	804.845	0.688104	0.101121	1.40841e-12	8.99808e-11	OTTHUMG00000021399.2	FUNDC1	HGNC:28746
ENSG00000110492.15	8074.66	-0.986274	0.146609	1.45359e-12	9.25437e-11	OTTHUMG00000150315.6	MDK	HGNC:6972
ENSG00000107833.10	1715.31	-1.0625	0.158155	1.49574e-12	9.48961e-11	OTTHUMG00000018942.2	NPM3	HGNC:7931
ENSG00000139182.15	1169.91	-0.778374	0.115395	1.7091e-12	1.07685e-10	OTTHUMG00000168167.5	CLSTN3	HGNC:18371
ENSG00000148180.19	910.567	-0.87528	0.13044	1.82201e-12	1.14405e-10	OTTHUMG00000020584.8	GSN	HGNC:4620
ENSG00000101210.12	5398.51	-0.881041	0.131284	1.90791e-12	1.19149e-10	OTTHUMG00000033076.3	EEF1A2	HGNC:3192
ENSG00000267368.1	838.555	-1.06559	0.159593	1.9106e-12	1.19149e-10	OTTHUMG00000165036.2	UPK3BL1	HGNC:37278
ENSG00000064961.19	3857.65	-0.747657	0.11113	2.10746e-12	1.30978e-10	OTTHUMG00000150437.7	HMG20B	HGNC:5002
ENSG00000142449.13	71.8589	-1.86697	0.282193	2.19768e-12	1.35662e-10	OTTHUMG00000182462.7	FBN3	HGNC:18794
ENSG00000158163.15	319.298	-0.879394	0.131475	2.19536e-12	1.35662e-10	OTTHUMG00000159819.4	DZIP1L	HGNC:26551
ENSG00000114735.9	1042.46	-0.669034	0.0993119	2.22424e-12	1.3638e-10	OTTHUMG00000156849.2	HEMK1	HGNC:24923
ENSG00000171155.8	597.244	0.748634	0.111523	2.22241e-12	1.3638e-10	OTTHUMG00000022305.2	C1GALT1C1	HGNC:24338
ENSG00000007255.10	317.42	-1.0326	0.15487	2.23638e-12	1.36666e-10	OTTHUMG00000181775.1	TRAPPC6A	HGNC:23069
ENSG00000180902.18	749.744	-0.713196	0.106062	2.3097e-12	1.40676e-10	OTTHUMG00000151474.15	D2HGDH	HGNC:28358
ENSG00000137776.17	4199.87	0.699826	0.104213	2.45334e-12	1.48929e-10	OTTHUMG00000074033.5	SLTM	HGNC:20709
ENSG00000110811.20	1058.42	-0.852421	0.127749	2.51896e-12	1.52406e-10	OTTHUMG00000168516.6	P3H3	HGNC:19318
ENSG00000225031.1	30.2664	2.64628	0.399442	2.60405e-12	1.57034e-10	OTTHUMG00000022206.1	EIF4BP7	HGNC:37940
ENSG00000005175.10	2253.77	0.79014	0.118291	2.795e-12	1.67443e-10	OTTHUMG00000169668.3	RPAP3	HGNC:26151
ENSG00000041982.16	773.764	1.47333	0.224104	3.05896e-12	1.82063e-10	OTTHUMG00000021010.7	TNC	HGNC:5318
ENSG00000174938.14	1999.4	-0.802698	0.120637	3.16044e-12	1.87492e-10	OTTHUMG00000132112.4	SEZ6L2	HGNC:30844
ENSG00000135506.16	4908.18	-0.612064	0.0911854	3.18746e-12	1.88483e-10	OTTHUMG00000170284.3	OS9	HGNC:16994
ENSG00000148450.13	300.052	-1.20818	0.18324	3.42352e-12	2.01789e-10	OTTHUMG00000017812.4	MSRB2	HGNC:17061
ENSG00000131080.15	226.849	1.08185	0.164323	3.62314e-12	2.12868e-10	OTTHUMG00000021736.3	EDA2R	HGNC:17756
ENSG00000155254.13	1862.95	-0.760587	0.114469	3.77115e-12	2.20854e-10	OTTHUMG00000018865.7	MARVELD1	HGNC:28674
ENSG00000162551.14	474.204	-0.800201	0.120543	3.83479e-12	2.23863e-10	OTTHUMG00000002949.3	ALPL	HGNC:438
ENSG00000064763.11	812.018	-0.688433	0.103621	3.92036e-12	2.2813e-10	OTTHUMG00000169320.4	FAR2	HGNC:25531
ENSG00000107551.21	337.849	-0.825601	0.124644	3.97329e-12	2.30476e-10	OTTHUMG00000018060.7	RASSF4	HGNC:20793
ENSG00000197857.14	48.4344	-3.06022	0.459294	3.99486e-12	2.30994e-10	OTTHUMG00000156424.3	ZNF44	HGNC:13110
ENSG00000139372.15	2156.97	0.715477	0.107564	4.06005e-12	2.34023e-10	OTTHUMG00000168418.4	TDG	HGNC:11700
ENSG00000187091.13	203.486	-1.16776	0.178021	4.08957e-12	2.34983e-10	OTTHUMG00000130813.6	PLCD1	HGNC:9060
ENSG00000171992.13	160.075	-1.39238	0.213136	4.27395e-12	2.43282e-10	OTTHUMG00000130078.3	SYNPO	HGNC:30672
ENSG00000161618.10	802.598	-0.824403	0.124848	4.33562e-12	2.46026e-10	OTTHUMG00000183163.3	ALDH16A1	HGNC:28114
ENSG00000130005.13	1032.22	-0.963658	0.146598	4.44721e-12	2.51577e-10	OTTHUMG00000180095.5	GAMT	HGNC:4136
ENSG00000185504.17	1741.14	-0.69364	0.104757	4.81887e-12	2.70925e-10	OTTHUMG00000167764.4	FAAP100	HGNC:26171
ENSG00000237550.5	206.085	-1.7513	0.268569	4.91449e-12	2.75453e-10	OTTHUMG00000158044.2	AC243919.1
ENSG00000101938.15	133.537	1.32758	0.203764	5.06297e-12	2.82907e-10	OTTHUMG00000022199.4	CHRDL1	HGNC:29861
ENSG00000235706.8	286.61	-0.936672	0.143067	5.4115e-12	3.0146e-10	OTTHUMG00000150190.6	DICER1-AS1	HGNC:43017
ENSG00000150760.12	2883.89	-0.767059	0.116592	5.51175e-12	3.05817e-10	OTTHUMG00000019249.4	DOCK1	HGNC:2987
ENSG00000171298.13	3656.52	-0.612963	0.0926808	5.52319e-12	3.05817e-10	OTTHUMG00000177537.3	GAA	HGNC:4065
ENSG00000187244.12	829.78	-0.802601	0.122251	5.93218e-12	3.27471e-10	OTTHUMG00000180838.6	BCAM	HGNC:6722
ENSG00000114544.16	919.821	-0.64898	0.0982625	6.00734e-12	3.30621e-10	OTTHUMG00000162678.10	SLC41A3	HGNC:31046
ENSG00000023697.13	406.617	-0.790157	0.12063	6.50938e-12	3.55043e-10	OTTHUMG00000165537.4	DERA	HGNC:24269
ENSG00000167393.18	1177.42	-0.650188	0.0986821	6.78855e-12	3.66983e-10	OTTHUMG00000021052.4	PPP2R3B	HGNC:13417
ENSG00000172890.13	1167.54	-0.607072	0.0919341	6.77968e-12	3.66983e-10	OTTHUMG00000167375.4	NADSYN1	HGNC:29832
ENSG00000185787.15	8877.94	0.650891	0.099085	7.39586e-12	3.97702e-10	OTTHUMG00000143865.9	MORF4L1	HGNC:16989
ENSG00000244165.2	298.532	1.79622	0.279131	7.40033e-12	3.97702e-10	OTTHUMG00000150166.4	P2RY11	HGNC:8540
ENSG00000188157.15	2244.81	-0.727847	0.11133	7.80312e-12	4.16897e-10	OTTHUMG00000040778.7	AGRN	HGNC:329
ENSG00000166889.14	2129.65	0.651507	0.0993503	8.64364e-12	4.57787e-10	OTTHUMG00000167423.3	PATL1	HGNC:26721
ENSG00000163702.20	296.6	-0.906071	0.14003	9.69438e-12	5.11953e-10	OTTHUMG00000128648.43	IL17RC	HGNC:18358
ENSG00000115257.15	140.361	-1.1783	0.183595	1.01208e-11	5.32931e-10	OTTHUMG00000128541.5	PCSK4	HGNC:8746
ENSG00000139410.15	378.723	-1.1157	0.173553	1.02347e-11	5.37378e-10	OTTHUMG00000169551.6	SDSL	HGNC:30404
ENSG00000179841.8	170.71	1.09963	0.171724	1.08849e-11	5.69883e-10	OTTHUMG00000029634.4	AKAP5	HGNC:375
ENSG00000171033.13	424.553	0.72025	0.111093	1.1693e-11	6.08705e-10	OTTHUMG00000164618.2	PKIA	HGNC:9017
ENSG00000184486.10	954.707	0.629297	0.096925	1.32961e-11	6.82434e-10	OTTHUMG00000015258.4	POU3F2	HGNC:9215
ENSG00000113971.20	684.047	-0.796403	0.123792	1.34922e-11	6.90558e-10	OTTHUMG00000159713.4	NPHP3	HGNC:7907
ENSG00000154928.18	174.733	-1.15087	0.180511	1.37504e-11	6.99855e-10	OTTHUMG00000159804.8	EPHB1	HGNC:3392
ENSG00000137103.20	661.941	-0.757726	0.117716	1.45066e-11	7.36291e-10	OTTHUMG00000019885.10	TMEM8B	HGNC:21427
ENSG00000196466.10	73.289	-1.6729	0.263431	1.49097e-11	7.54652e-10	OTTHUMG00000156408.3	ZNF799	HGNC:28071
ENSG00000251474.6	586.857	-1.03	0.161828	1.54362e-11	7.79146e-10	OTTHUMG00000159465.3	RPL32P3	HGNC:27024
ENSG00000181467.5	1133.15	0.613726	0.0946423	1.57359e-11	7.92082e-10	OTTHUMG00000159655.3	RAP2B	HGNC:9862
ENSG00000163686.15	299.262	0.815006	0.127222	1.70514e-11	8.53599e-10	OTTHUMG00000159150.3	ABHD6	HGNC:21398
ENSG00000177459.11	154.84	1.1828	0.186457	1.70457e-11	8.53599e-10	OTTHUMG00000164819.2	ERICH5	HGNC:26823
ENSG00000111788.10	588.518	-0.888301	0.139528	1.8211e-11	9.09157e-10	OTTHUMG00000168367.4	AC009533.1
ENSG00000185100.10	219.314	-1.03223	0.162935	1.91089e-11	9.48799e-10	OTTHUMG00000170818.3	ADSS1	HGNC:20093
ENSG00000237036.5	342.489	-0.860366	0.134974	1.93987e-11	9.60578e-10	OTTHUMG00000017905.5	ZEB1-AS1	HGNC:42354
ENSG00000155229.21	3248.4	-0.695905	0.108747	2.10713e-11	1.03778e-09	OTTHUMG00000018857.6	MMS19	HGNC:13824
ENSG00000285283.1	158.513	6.35977	0.993489	2.15543e-11	1.05587e-09	OTTHUMG00000192409.1	AL035078.4
ENSG00000102195.10	850.534	1.17412	0.186334	2.16528e-11	1.05786e-09	OTTHUMG00000024166.2	GPR50	HGNC:4506
ENSG00000107902.14	382.62	-1.00449	0.158797	2.19243e-11	1.06827e-09	OTTHUMG00000019214.2	LHPP	HGNC:30042
ENSG00000163082.10	212.593	1.00766	0.159455	2.23118e-11	1.08426e-09	OTTHUMG00000133156.3	SGPP2	HGNC:19953
ENSG00000179195.16	6537.69	0.695479	0.109459	2.6647e-11	1.28808e-09	OTTHUMG00000168596.3	ZNF664	HGNC:25406
ENSG00000177352.10	861.663	-0.599568	0.0937241	2.70599e-11	1.30459e-09	OTTHUMG00000156815.3	CCDC71	HGNC:25760
ENSG00000070495.14	1143.01	0.695442	0.10939	2.88773e-11	1.38854e-09	OTTHUMG00000169267.3	JMJD6	HGNC:19355
ENSG00000087245.13	698.427	-0.94575	0.150378	2.92496e-11	1.40275e-09	OTTHUMG00000133202.6	MMP2	HGNC:7166
ENSG00000151729.11	1469.73	0.593759	0.0926136	2.99313e-11	1.42795e-09	OTTHUMG00000134299.5	SLC25A4	HGNC:10990
ENSG00000124074.12	477.245	-0.772156	0.122362	3.29261e-11	1.56266e-09	OTTHUMG00000137550.6	ENKD1	HGNC:25246
ENSG00000125944.20	13287.5	0.723095	0.114684	3.48301e-11	1.64449e-09	OTTHUMG00000003224.6	HNRNPR	HGNC:5047
ENSG00000013306.16	4345.5	-0.626741	0.0993297	3.6404e-11	1.71128e-09	OTTHUMG00000132628.4	SLC25A39	HGNC:24279
ENSG00000106077.18	499.668	-0.892153	0.14175	3.64322e-11	1.71128e-09	OTTHUMG00000130029.4	ABHD11	HGNC:16407
ENSG00000090006.17	2229.46	-0.644008	0.101678	3.77712e-11	1.7651e-09	OTTHUMG00000182635.12	LTBP4	HGNC:6717
ENSG00000167703.14	483.112	-0.828315	0.132233	3.89692e-11	1.81182e-09	OTTHUMG00000090345.7	SLC43A2	HGNC:23087
ENSG00000155287.11	621.15	-0.68122	0.10812	4.20569e-11	1.95042e-09	OTTHUMG00000018886.3	SLC25A28	HGNC:23472
ENSG00000184489.12	426.249	-0.89335	0.143091	4.2229e-11	1.95344e-09	OTTHUMG00000164490.3	PTP4A3	HGNC:9636
ENSG00000102755.12	627.543	0.733892	0.116844	4.26417e-11	1.96755e-09	OTTHUMG00000016648.6	FLT1	HGNC:3763
ENSG00000114626.18	243.208	-1.11813	0.180656	4.40596e-11	2.02276e-09	OTTHUMG00000159636.2	ABTB1	HGNC:18275
ENSG00000119888.11	65.0621	1.4966	0.242285	4.45858e-11	2.04178e-09	OTTHUMG00000128853.10	EPCAM	HGNC:11529
ENSG00000175697.10	45.735	-2.16099	0.351706	4.57182e-11	2.0832e-09	OTTHUMG00000159406.1	GPR156	HGNC:20844
ENSG00000072195.15	852.517	-0.848521	0.136361	4.96484e-11	2.24738e-09	OTTHUMG00000193740.2	SPEG	HGNC:16901
ENSG00000131480.9	101.49	1.45355	0.236413	4.96903e-11	2.24738e-09	OTTHUMG00000180655.2	AOC2	HGNC:549
ENSG00000114631.11	2437.16	-0.605094	0.0959619	5.00285e-11	2.25709e-09	OTTHUMG00000159642.2	PODXL2	HGNC:17936
ENSG00000163617.11	238.432	-0.962751	0.156616	5.22524e-11	2.35162e-09	OTTHUMG00000159337.5	CCDC191	HGNC:29272
ENSG00000106100.11	347.223	-0.782326	0.125438	5.27441e-11	2.36791e-09	OTTHUMG00000023923.5	NOD1	HGNC:16390
ENSG00000008735.14	966.191	-0.626872	0.0999982	5.80658e-11	2.60044e-09	OTTHUMG00000150181.8	MAPK8IP2	HGNC:6883
ENSG00000178585.15	607.805	-0.655415	0.104739	5.885e-11	2.62911e-09	OTTHUMG00000001796.2	CTNNBIP1	HGNC:16913
ENSG00000196975.16	471.456	-0.808751	0.130402	5.97558e-11	2.66307e-09	OTTHUMG00000129649.6	ANXA4	HGNC:542
ENSG00000100429.18	510.813	-0.873008	0.141084	6.248e-11	2.7777e-09	OTTHUMG00000044647.7	HDAC10	HGNC:18128
ENSG00000139880.19	449.007	-0.659486	0.105686	6.74653e-11	2.98481e-09	OTTHUMG00000028715.7	CDH24	HGNC:14265
ENSG00000240342.3	26279.7	-0.884836	0.143679	7.02245e-11	3.09938e-09	OTTHUMG00000157753.1	RPS2P5	HGNC:31386
ENSG00000205309.14	199.071	-1.09045	0.177887	7.30731e-11	3.21733e-09	OTTHUMG00000059277.4	NT5M	HGNC:15769
ENSG00000129422.14	863.583	0.700222	0.112587	7.48879e-11	3.28142e-09	OTTHUMG00000163756.5	MTUS1	HGNC:29789
ENSG00000132688.11	1005.49	-0.827398	0.134502	8.10031e-11	3.54088e-09	OTTHUMG00000034299.3	NES	HGNC:7756
ENSG00000185002.10	27.6104	2.296	0.377962	8.46012e-11	3.68934e-09	OTTHUMG00000015449.5	RFX6	HGNC:21478
ENSG00000131378.14	371.777	-0.692663	0.112311	8.61124e-11	3.7463e-09	OTTHUMG00000156973.5	RFTN1	HGNC:30278
ENSG00000121005.9	511.676	-1.14226	0.188135	8.85706e-11	3.84409e-09	OTTHUMG00000164529.3	CRISPLD1	HGNC:18206
ENSG00000008405.12	879.458	0.694556	0.112436	8.95687e-11	3.8708e-09	OTTHUMG00000170005.3	CRY1	HGNC:2384
ENSG00000136960.12	161.525	1.15801	0.1903	8.96097e-11	3.8708e-09	OTTHUMG00000164995.2	ENPP2	HGNC:3357
ENSG00000006757.12	108.311	1.22571	0.201798	9.19756e-11	3.96363e-09	OTTHUMG00000021103.3	PNPLA4	HGNC:24887
ENSG00000160161.9	601.474	-0.884296	0.144443	9.26885e-11	3.98495e-09	OTTHUMG00000182148.4	CILP2	HGNC:24213
ENSG00000143578.16	392.419	-0.746128	0.121342	9.34145e-11	4.00674e-09	OTTHUMG00000037159.4	CREB3L4	HGNC:18854
ENSG00000175482.9	229.16	-0.997177	0.163338	9.36699e-11	4.00828e-09	OTTHUMG00000167135.5	POLD4	HGNC:14106
ENSG00000145020.16	132.969	-1.27949	0.212199	9.58335e-11	4.09128e-09	OTTHUMG00000156847.13	AMT	HGNC:473
ENSG00000123992.19	898.257	-0.609758	0.098465	9.82877e-11	4.17654e-09	OTTHUMG00000058919.7	DNPEP	HGNC:2981
ENSG00000185324.22	1183.32	-0.635611	0.103089	1.00738e-10	4.27074e-09	OTTHUMG00000138049.5	CDK10	HGNC:1770
ENSG00000255152.8	562.479	-0.967443	0.158798	1.01165e-10	4.27892e-09	OTTHUMG00000031139.11	MSH5-SAPCD1	HGNC:41994
ENSG00000081386.12	303.368	0.859087	0.140899	1.05302e-10	4.44359e-09	OTTHUMG00000020303.2	ZNF510	HGNC:29161
ENSG00000214021.16	1573.54	-0.599077	0.0968461	1.09088e-10	4.59275e-09	OTTHUMG00000128439.14	TTLL3	HGNC:24483
ENSG00000159753.14	330.67	-0.971628	0.160126	1.19362e-10	5.00224e-09	OTTHUMG00000184043.3	CARMIL2	HGNC:27089
ENSG00000111879.20	1273.36	0.667842	0.108851	1.24248e-10	5.19509e-09	OTTHUMG00000015471.8	FAM184A	HGNC:20991
ENSG00000198626.17	147.79	1.21389	0.201936	1.27961e-10	5.33812e-09	OTTHUMG00000039543.5	RYR2	HGNC:10484
ENSG00000106330.12	341.812	-0.965112	0.159547	1.29084e-10	5.37271e-09	OTTHUMG00000159599.3	MOSPD3	HGNC:25078
ENSG00000172262.11	1340.44	0.626379	0.102146	1.40003e-10	5.78762e-09	OTTHUMG00000162223.3	ZNF131	HGNC:12915
ENSG00000136425.14	639.144	-0.70292	0.115131	1.40728e-10	5.79634e-09	OTTHUMG00000143731.6	CIB2	HGNC:24579
ENSG00000100867.14	314.718	-1.20381	0.20135	1.46114e-10	5.97312e-09	OTTHUMG00000028771.5	DHRS2	HGNC:18349
ENSG00000138111.14	545.4	-0.630815	0.103053	1.46124e-10	5.97312e-09	OTTHUMG00000018961.3	MFSD13A	HGNC:26196
ENSG00000121900.19	463.117	-0.973466	0.161506	1.49729e-10	6.10229e-09	OTTHUMG00000004016.4	TMEM54	HGNC:24143
ENSG00000136378.15	363.918	-1.01316	0.168629	1.53045e-10	6.20055e-09	OTTHUMG00000172907.2	ADAMTS7	HGNC:223
ENSG00000138398.16	4803	0.716196	0.118953	1.54487e-10	6.24509e-09	OTTHUMG00000132206.6	PPIG	HGNC:14650
ENSG00000168243.11	842.75	-0.771378	0.127638	1.67747e-10	6.76618e-09	OTTHUMG00000040740.4	GNG4	HGNC:4407
ENSG00000213553.4	134.134	-1.45088	0.242668	1.68647e-10	6.78749e-09	OTTHUMG00000153430.1	RPLP0P6	HGNC:36404
ENSG00000239382.10	457.041	-0.618882	0.101518	1.7773e-10	7.09055e-09	OTTHUMG00000048137.11	ALKBH6	HGNC:28243
ENSG00000076201.15	1530.84	-0.652367	0.107338	1.79963e-10	7.14844e-09	OTTHUMG00000133520.6	PTPN23	HGNC:14406
ENSG00000164163.11	5155.35	0.605436	0.0987439	1.7973e-10	7.14844e-09	OTTHUMG00000161478.4	ABCE1	HGNC:69
ENSG00000092036.18	1061.24	-0.764985	0.126798	1.85135e-10	7.33794e-09	OTTHUMG00000028710.8	HAUS4	HGNC:20163
ENSG00000011028.14	1791.94	-0.95337	0.159263	1.86382e-10	7.37136e-09	OTTHUMG00000179178.3	MRC2	HGNC:16875
ENSG00000174748.21	21381.2	-0.751939	0.12473	1.8749e-10	7.38323e-09	OTTHUMG00000130485.10	RPL15	HGNC:10306
ENSG00000185515.14	1717.35	0.594596	0.0975502	1.89988e-10	7.46551e-09	OTTHUMG00000022658.6	BRCC3	HGNC:24185
ENSG00000242173.10	313.497	-0.980213	0.163568	1.92279e-10	7.53932e-09	OTTHUMG00000064892.7	ARHGDIG	HGNC:680
ENSG00000135842.17	298.902	1.62338	0.274621	1.93102e-10	7.55539e-09	OTTHUMG00000035388.3	NIBAN1	HGNC:16784
ENSG00000188878.19	1507.55	-0.58618	0.0964458	1.95476e-10	7.63193e-09	OTTHUMG00000179919.7	FBF1	HGNC:24674
ENSG00000163520.14	188.963	-1.27652	0.215406	1.97502e-10	7.67822e-09	OTTHUMG00000155437.10	FBLN2	HGNC:3601
ENSG00000104490.18	167.127	0.94302	0.157411	2.01882e-10	7.81524e-09	OTTHUMG00000164876.8	NCALD	HGNC:7655
ENSG00000139737.22	1168.63	0.711599	0.118134	2.21499e-10	8.5205e-09	OTTHUMG00000017110.12	SLAIN1	HGNC:26387
ENSG00000157152.17	281.039	-0.838299	0.14031	2.27923e-10	8.73084e-09	OTTHUMG00000155335.10	SYN2	HGNC:11495
ENSG00000188234.13	575.663	-0.64712	0.10719	2.40979e-10	9.17325e-09	OTTHUMG00000018088.2	AGAP4	HGNC:23459
ENSG00000243989.9	453.979	-0.803479	0.134423	2.52843e-10	9.58495e-09	OTTHUMG00000157815.15	ACY1	HGNC:177
ENSG00000144744.17	1489.12	0.641256	0.106412	2.59949e-10	9.83392e-09	OTTHUMG00000154325.4	UBA3	HGNC:12470
ENSG00000107874.11	1774.78	-0.679584	0.113279	2.75045e-10	1.03835e-08	OTTHUMG00000018958.3	CUEDC2	HGNC:28352
ENSG00000107819.13	511.203	-0.814223	0.136785	2.88527e-10	1.087e-08	OTTHUMG00000018921.5	SFXN3	HGNC:16087
ENSG00000150510.16	117.895	1.00665	0.170053	2.89587e-10	1.08875e-08	OTTHUMG00000016942.5	FAM124A	HGNC:26413
ENSG00000110455.14	380.737	-0.746871	0.12521	2.95432e-10	1.10391e-08	OTTHUMG00000166427.5	ACCS	HGNC:23989
ENSG00000143479.17	829.633	0.587067	0.0977591	2.94829e-10	1.10391e-08	OTTHUMG00000036339.5	DYRK3	HGNC:3094
ENSG00000161395.14	286.736	-0.827685	0.139609	3.32571e-10	1.23511e-08	OTTHUMG00000179110.6	PGAP3	HGNC:23719
ENSG00000135316.18	9923.55	0.685614	0.114652	3.37652e-10	1.2489e-08	OTTHUMG00000015141.5	SYNCRIP	HGNC:16918
ENSG00000228327.3	1242.09	-0.654612	0.109698	3.51163e-10	1.29364e-08	OTTHUMG00000002406.2	AL669831.1
ENSG00000260807.7	265.801	-0.785661	0.132785	3.57446e-10	1.31413e-08	OTTHUMG00000172822.3	CEROX1	HGNC:53928
ENSG00000104983.8	150.615	-1.32023	0.226914	3.8364e-10	1.40761e-08	OTTHUMG00000182488.1	CCDC61	HGNC:33629
ENSG00000255823.5	224.099	-3.6286	0.6273	3.9098e-10	1.43166e-08	OTTHUMG00000184980.2	MTRNR2L8	HGNC:37165
ENSG00000005189.19	611.038	-0.635281	0.106673	3.96704e-10	1.44805e-08	OTTHUMG00000131556.5	REXO5	HGNC:24661
ENSG00000149476.15	1130.18	-0.625646	0.105	3.97042e-10	1.44805e-08	OTTHUMG00000168076.5	TKFC	HGNC:24552
ENSG00000117461.15	919	0.623997	0.104852	4.17758e-10	1.52057e-08	OTTHUMG00000008096.4	PIK3R3	HGNC:8981
ENSG00000149499.11	679.771	-0.912741	0.155638	4.18707e-10	1.521e-08	OTTHUMG00000149817.9	EML3	HGNC:26666
ENSG00000170667.14	110.762	-1.22368	0.210561	4.24882e-10	1.53732e-08	OTTHUMG00000022944.11	RASA4B	HGNC:35202
ENSG00000008382.15	433.808	-0.815184	0.138905	4.41807e-10	1.59225e-08	OTTHUMG00000181914.2	MPND	HGNC:25934
ENSG00000144668.12	119.745	-1.31674	0.227595	4.52748e-10	1.62847e-08	OTTHUMG00000130815.5	ITGA9	HGNC:6145
ENSG00000105696.9	385.587	-0.819467	0.139521	4.78458e-10	1.71419e-08	OTTHUMG00000183113.5	TMEM59L	HGNC:13237
ENSG00000152580.8	97.2372	1.33798	0.231292	4.86002e-10	1.73781e-08	OTTHUMG00000159856.1	IGSF10	HGNC:26384
ENSG00000099864.18	933.321	-0.588631	0.0990445	4.90636e-10	1.75096e-08	OTTHUMG00000181785.12	PALM	HGNC:8594
ENSG00000187024.15	140.913	-1.12191	0.193708	5.24598e-10	1.86851e-08	OTTHUMG00000020710.9	PTRH1	HGNC:27039
ENSG00000125611.15	309.662	-0.989703	0.170067	5.28692e-10	1.87943e-08	OTTHUMG00000131312.2	CHCHD5	HGNC:17840
ENSG00000100092.23	966.843	-0.639544	0.10841	5.34388e-10	1.89599e-08	OTTHUMG00000030996.8	SH3BP1	HGNC:10824
ENSG00000131848.9	154.929	1.08074	0.18626	5.39394e-10	1.91004e-08	OTTHUMG00000181883.6	ZSCAN5A	HGNC:23710
ENSG00000279716.1	158.34	-1.47648	0.257204	5.58385e-10	1.97346e-08	OTTHUMG00000182477.2	AC006128.1
ENSG00000152661.9	1533.46	0.624242	0.105645	5.61489e-10	1.98061e-08	OTTHUMG00000015479.2	GJA1	HGNC:4274
ENSG00000089847.12	157.672	-1.08858	0.188458	5.95203e-10	2.09548e-08	OTTHUMG00000181865.3	ANKRD24	HGNC:29424
ENSG00000143502.15	96.7632	1.14626	0.198367	6.02562e-10	2.11325e-08	OTTHUMG00000037936.6	SUSD4	HGNC:25470
ENSG00000166501.14	743.075	-0.665761	0.113445	6.05759e-10	2.11633e-08	OTTHUMG00000131615.9	PRKCB	HGNC:9395
ENSG00000111653.20	469.093	-0.796315	0.136653	6.15618e-10	2.14258e-08	OTTHUMG00000141274.7	ING4	HGNC:19423
ENSG00000250575.1	121.037	-1.30563	0.226949	6.1503e-10	2.14258e-08	OTTHUMG00000002861.2	AL732372.3
ENSG00000172731.14	1030.54	-0.594669	0.100973	6.35356e-10	2.20708e-08	OTTHUMG00000018407.4	LRRC20	HGNC:23421
ENSG00000204710.2	223.111	-1.06501	0.184865	6.7651e-10	2.3323e-08	OTTHUMG00000165611.1	SPDYC	HGNC:32681
ENSG00000214182.5	94.8101	-1.78193	0.311153	7.32078e-10	2.50967e-08	OTTHUMG00000017147.4	PTMAP5	HGNC:9628
ENSG00000228727.9	113.462	-1.30046	0.227552	7.53059e-10	2.57676e-08	OTTHUMG00000031131.6	SAPCD1	HGNC:13938
ENSG00000168952.15	265.542	-0.821033	0.141787	7.62991e-10	2.60586e-08	OTTHUMG00000140186.3	STXBP6	HGNC:19666
ENSG00000163946.13	3785.97	0.633839	0.108783	7.75432e-10	2.64341e-08	OTTHUMG00000158827.5	TASOR	HGNC:30314
ENSG00000196205.8	3189.66	-0.706258	0.121412	7.78248e-10	2.64807e-08	OTTHUMG00000020851.3	EEF1A1P5	HGNC:3200
ENSG00000132394.11	812.207	-0.644758	0.110664	8.48489e-10	2.88171e-08	OTTHUMG00000159659.4	EEFSEC	HGNC:24614
ENSG00000138081.20	1802.28	0.686051	0.118113	8.54586e-10	2.89167e-08	OTTHUMG00000129130.6	FBXO11	HGNC:13590
ENSG00000164638.10	597.275	-0.72126	0.124406	8.75663e-10	2.95751e-08	OTTHUMG00000023797.7	SLC29A4	HGNC:23097
ENSG00000213780.11	806.128	-0.656273	0.112923	8.79122e-10	2.96371e-08	OTTHUMG00000031043.5	GTF2H4	HGNC:4658
ENSG00000139364.10	56.1505	1.47356	0.259297	8.8973e-10	2.99395e-08	OTTHUMG00000168520.2	TMEM132B	HGNC:29397
ENSG00000089693.10	4833.58	-0.605035	0.103707	9.04366e-10	3.03761e-08	OTTHUMG00000168717.5	MLF2	HGNC:7126
ENSG00000035115.22	269.272	-0.835645	0.145241	9.1901e-10	3.06476e-08	OTTHUMG00000151359.9	SH3YL1	HGNC:29546
ENSG00000134508.12	1287.25	0.600944	0.102895	9.24756e-10	3.0778e-08	OTTHUMG00000179186.5	CABLES1	HGNC:25097
ENSG00000173930.9	112.846	1.19068	0.209432	9.58935e-10	3.18576e-08	OTTHUMG00000162757.2	SLCO4C1	HGNC:23612
ENSG00000187838.17	417.568	-0.755516	0.131005	9.80792e-10	3.25246e-08	OTTHUMG00000178169.7	PLSCR3	HGNC:16495
ENSG00000131115.16	577.606	0.629764	0.108375	9.85165e-10	3.26104e-08	OTTHUMG00000182352.3	ZNF227	HGNC:13020
ENSG00000125746.16	774.485	-0.741554	0.128665	1.01183e-09	3.33722e-08	OTTHUMG00000182127.2	EML2	HGNC:18035
ENSG00000088881.20	517.49	-0.805725	0.140227	1.04046e-09	3.41931e-08	OTTHUMG00000031709.7	EBF4	HGNC:29278
ENSG00000163870.16	628.936	-0.7822	0.136156	1.05813e-09	3.47112e-08	OTTHUMG00000159639.9	TPRA1	HGNC:30413
ENSG00000102543.14	286.916	0.912397	0.159655	1.07079e-09	3.50512e-08	OTTHUMG00000016913.6	CDADC1	HGNC:20299
ENSG00000128335.14	591.376	0.623973	0.107626	1.08706e-09	3.54691e-08	OTTHUMG00000150634.6	APOL2	HGNC:619
ENSG00000147041.12	427.082	-0.782014	0.136277	1.13331e-09	3.67813e-08	OTTHUMG00000033176.2	SYTL5	HGNC:15589
ENSG00000124160.12	1766.37	0.61261	0.105737	1.1684e-09	3.78529e-08	OTTHUMG00000032639.5	NCOA5	HGNC:15909
ENSG00000285000.1	302.529	1.56336	0.27907	1.21925e-09	3.94304e-08	OTTHUMG00000192507.1	AC008581.2
ENSG00000175455.15	4559.32	-0.626969	0.10882	1.27499e-09	4.10152e-08	OTTHUMG00000153005.23	CCDC14	HGNC:25766
ENSG00000221914.11	2548.12	0.593951	0.102603	1.27359e-09	4.10152e-08	OTTHUMG00000163850.17	PPP2R2A	HGNC:9304
ENSG00000125895.5	291.663	-0.760227	0.133025	1.32405e-09	4.25184e-08	OTTHUMG00000031655.3	TMEM74B	HGNC:15893
ENSG00000245205.3	23.3209	-2.89515	0.506135	1.33889e-09	4.29197e-08	OTTHUMG00000168909.1	EEF1A1P4	HGNC:3199
ENSG00000218227.3	30.1929	-2.96144	0.516222	1.36153e-09	4.35689e-08	OTTHUMG00000157953.1	AC136632.1
ENSG00000205609.12	7010.99	-0.632286	0.110026	1.43473e-09	4.5831e-08	OTTHUMG00000097025.1	EIF3CL	HGNC:26347
ENSG00000257218.6	1907.5	0.592736	0.102833	1.44173e-09	4.59744e-08	OTTHUMG00000047788.6	GATC	HGNC:25068
ENSG00000105376.5	427.513	-0.8439	0.148941	1.48655e-09	4.73209e-08	OTTHUMG00000180406.4	ICAM5	HGNC:5348
ENSG00000058063.16	1212.37	0.592883	0.103111	1.56056e-09	4.91676e-08	OTTHUMG00000158295.4	ATP11B	HGNC:13553
ENSG00000159403.18	299.466	-0.810851	0.143616	1.56062e-09	4.91676e-08	OTTHUMG00000168149.10	C1R	HGNC:1246
ENSG00000140400.17	2913.04	-0.66693	0.116802	1.58839e-09	4.97822e-08	OTTHUMG00000172698.7	MAN2C1	HGNC:6827
ENSG00000113140.11	1284.56	0.719296	0.126517	1.60984e-09	5.03682e-08	OTTHUMG00000130122.5	SPARC	HGNC:11219
ENSG00000269028.3	38527.5	-1.62828	0.293612	1.65766e-09	5.17756e-08	OTTHUMG00000175726.3	MTRNR2L12	HGNC:37169
ENSG00000172889.16	748.378	-0.840304	0.148752	1.67009e-09	5.19861e-08	OTTHUMG00000020938.6	EGFL7	HGNC:20594
ENSG00000196557.13	1572.04	-0.603546	0.105295	1.66934e-09	5.19861e-08	OTTHUMG00000172992.5	CACNA1H	HGNC:1395
ENSG00000196284.16	413.046	-0.621293	0.10917	1.7159e-09	5.31549e-08	OTTHUMG00000014773.6	SUPT3H	HGNC:11466
ENSG00000172893.15	3085.25	0.626847	0.109684	1.74322e-09	5.38043e-08	OTTHUMG00000167346.3	DHCR7	HGNC:2860
ENSG00000186523.14	386.441	-0.721065	0.127343	1.74144e-09	5.38043e-08	OTTHUMG00000165298.5	FAM86B1	HGNC:28268
ENSG00000180376.17	1395.97	0.657907	0.115406	1.76219e-09	5.42843e-08	OTTHUMG00000155748.5	CCDC66	HGNC:27709
ENSG00000183087.15	444.948	-0.635467	0.111384	1.76471e-09	5.42843e-08	OTTHUMG00000017395.5	GAS6	HGNC:4168
ENSG00000125637.16	187.52	-0.991091	0.177464	1.77416e-09	5.43999e-08	OTTHUMG00000153339.4	PSD4	HGNC:19096
ENSG00000155893.13	506.383	-0.638797	0.112022	1.77443e-09	5.43999e-08	OTTHUMG00000160171.6	PXYLP1	HGNC:26303
ENSG00000154945.7	2202.61	0.591136	0.103494	1.85577e-09	5.67982e-08	OTTHUMG00000162255.5	ANKRD40	HGNC:28233
ENSG00000091164.13	1585.04	0.621105	0.108758	1.8754e-09	5.73032e-08	OTTHUMG00000132722.7	TXNL1	HGNC:12436
ENSG00000151006.7	248.521	-1.0625	0.190911	1.95823e-09	5.93381e-08	OTTHUMG00000047358.6	PRSS53	HGNC:34407
ENSG00000161513.12	959.55	-0.709931	0.125502	1.98463e-09	5.98403e-08	OTTHUMG00000179026.9	FDXR	HGNC:3642
ENSG00000164128.7	97.8622	1.06568	0.191394	1.98173e-09	5.98403e-08	OTTHUMG00000161371.4	NPY1R	HGNC:7956
ENSG00000105821.15	3277.09	0.695728	0.122826	1.99286e-09	5.99894e-08	OTTHUMG00000157202.4	DNAJC2	HGNC:13192
ENSG00000127990.19	553.071	0.595246	0.104349	2.03679e-09	6.11104e-08	OTTHUMG00000022828.19	SGCE	HGNC:10808
ENSG00000130294.16	2746.85	0.701481	0.12355	2.11056e-09	6.31166e-08	OTTHUMG00000151940.14	KIF1A	HGNC:888
ENSG00000176771.17	58.6917	-4.96145	0.82968	2.14525e-09	6.40489e-08	OTTHUMG00000153573.11	NCKAP5	HGNC:29847
ENSG00000239665.8	386.012	-0.842095	0.150804	2.25732e-09	6.71754e-08	OTTHUMG00000191439.1	AL157392.3
ENSG00000140939.14	223.474	-0.966946	0.174002	2.47211e-09	7.30912e-08	OTTHUMG00000173316.3	NOL3	HGNC:7869
ENSG00000116044.16	1474.31	0.60903	0.107562	2.47939e-09	7.31881e-08	OTTHUMG00000133620.18	NFE2L2	HGNC:7782
ENSG00000244731.8	88.7619	-1.34887	0.245223	2.48856e-09	7.33403e-08	OTTHUMG00000031186.6	C4A	HGNC:1323
ENSG00000171295.13	106.723	-1.40818	0.257654	2.50282e-09	7.36e-08	OTTHUMG00000156403.5	ZNF440	HGNC:20874
ENSG00000188906.16	108.299	1.08106	0.195282	2.50543e-09	7.36e-08	OTTHUMG00000059742.12	LRRK2	HGNC:18618
ENSG00000060339.14	5635.56	0.585586	0.103853	2.86625e-09	8.35281e-08	OTTHUMG00000018361.6	CCAR1	HGNC:24236
ENSG00000128656.14	701.489	0.592508	0.104917	2.89442e-09	8.42147e-08	OTTHUMG00000154225.36	CHN1	HGNC:1943
ENSG00000197119.13	814.572	-0.719521	0.128907	2.95554e-09	8.58565e-08	OTTHUMG00000171569.5	SLC25A29	HGNC:20116
ENSG00000185615.15	172.356	-1.02757	0.186479	2.99907e-09	8.69826e-08	OTTHUMG00000064891.5	PDIA2	HGNC:14180
ENSG00000120896.13	1580.84	-0.620567	0.110977	3.64247e-09	1.04977e-07	OTTHUMG00000131728.7	SORBS3	HGNC:30907
ENSG00000198000.12	2934.01	0.626838	0.112172	3.69503e-09	1.06324e-07	OTTHUMG00000020221.7	NOL8	HGNC:23387
ENSG00000001630.17	2161.77	0.615324	0.110212	3.82886e-09	1.09314e-07	OTTHUMG00000193420.2	CYP51A1	HGNC:2649
ENSG00000130304.17	265.344	-0.888567	0.1626	3.92261e-09	1.11816e-07	OTTHUMG00000182878.2	SLC27A1	HGNC:10995
ENSG00000106479.11	556.378	-0.595867	0.106893	3.94328e-09	1.1223e-07	OTTHUMG00000158093.4	ZNF862	HGNC:34519
ENSG00000064218.5	32.6576	2.25271	0.41325	3.97318e-09	1.12905e-07	OTTHUMG00000019436.4	DMRT3	HGNC:13909
ENSG00000089157.16	35610.7	-0.7603	0.137883	4.02156e-09	1.14102e-07	OTTHUMG00000169317.10	RPLP0	HGNC:10371
ENSG00000105254.12	1980.12	-0.624098	0.112123	4.14847e-09	1.17339e-07	OTTHUMG00000048143.10	TBCB	HGNC:1989
ENSG00000186660.15	3145.3	0.668651	0.12067	4.2041e-09	1.18728e-07	OTTHUMG00000137391.5	ZFP91	HGNC:14983
ENSG00000183735.10	929.853	0.659797	0.118792	4.33398e-09	1.22019e-07	OTTHUMG00000168796.4	TBK1	HGNC:11584
ENSG00000166897.15	260.139	-0.995285	0.18317	4.51239e-09	1.26652e-07	OTTHUMG00000150558.4	ELFN2	HGNC:29396
ENSG00000151690.15	224.192	0.935074	0.171796	4.58675e-09	1.28148e-07	OTTHUMG00000132671.5	MFSD6	HGNC:24711
ENSG00000107736.21	683.554	-0.812489	0.148745	4.59821e-09	1.28272e-07	OTTHUMG00000019347.18	CDH23	HGNC:13733
ENSG00000152256.13	1073.08	-0.724293	0.131672	4.60591e-09	1.28292e-07	OTTHUMG00000132285.7	PDK1	HGNC:8809
ENSG00000225067.4	23.0934	2.79162	0.517862	4.6143e-09	1.28329e-07	OTTHUMG00000158039.3	RPL23AP2	HGNC:10319
ENSG00000134461.16	459.242	-0.754129	0.137551	4.6259e-09	1.28457e-07	OTTHUMG00000017610.4	ANKRD16	HGNC:23471
ENSG00000170500.13	924.23	0.83569	0.15288	4.72648e-09	1.30852e-07	OTTHUMG00000130668.4	LONRF2	HGNC:24788
ENSG00000138468.16	286.556	-0.837258	0.153776	4.9191e-09	1.3593e-07	OTTHUMG00000149927.4	SENP7	HGNC:30402
ENSG00000184897.6	5487.62	-0.955126	0.176097	4.92478e-09	1.3593e-07	OTTHUMG00000159450.3	H1-10	HGNC:4722
ENSG00000146828.18	691.458	-0.620226	0.112215	5.01955e-09	1.38337e-07	OTTHUMG00000156045.4	SLC12A9	HGNC:17435
ENSG00000142541.17	54245.4	-0.869087	0.159782	5.09065e-09	1.40085e-07	OTTHUMG00000134289.5	RPL13A	HGNC:10304
ENSG00000172954.13	1346.9	0.682387	0.123944	5.17343e-09	1.42149e-07	OTTHUMG00000099349.7	LCLAT1	HGNC:26756
ENSG00000006071.14	394.544	-0.81106	0.148777	5.30862e-09	1.45426e-07	OTTHUMG00000166316.33	ABCC8	HGNC:59
ENSG00000087269.16	5330.45	0.627682	0.113805	5.41731e-09	1.48181e-07	OTTHUMG00000159911.5	NOP14	HGNC:16821
ENSG00000171159.5	456.558	-0.808979	0.148811	5.64426e-09	1.5347e-07	OTTHUMG00000020731.2	C9orf16	HGNC:17823
ENSG00000265690.7	85.5375	-1.12123	0.208782	5.77657e-09	1.56834e-07	OTTHUMG00000163737.3	AC074143.1
ENSG00000163884.4	264.118	-0.711871	0.130538	6.1825e-09	1.66617e-07	OTTHUMG00000162689.2	KLF15	HGNC:14536
ENSG00000160746.13	596.733	-0.671219	0.122657	6.26104e-09	1.68486e-07	OTTHUMG00000133044.15	ANO10	HGNC:25519
ENSG00000103067.14	22.6959	-2.26977	0.425021	6.30522e-09	1.69425e-07	OTTHUMG00000137557.9	ESRP2	HGNC:26152
ENSG00000167371.21	168.23	-1.08764	0.20256	6.42233e-09	1.72066e-07	OTTHUMG00000177142.66	PRRT2	HGNC:30500
ENSG00000203875.13	2042.37	-0.672721	0.123056	6.45748e-09	1.72754e-07	OTTHUMG00000015144.83	SNHG5	HGNC:21026
ENSG00000110786.18	55.7191	-1.4344	0.269687	6.50156e-09	1.73426e-07	OTTHUMG00000134304.4	PTPN5	HGNC:9657
ENSG00000064012.22	465.153	0.941843	0.17515	6.56575e-09	1.74882e-07	OTTHUMG00000132821.17	CASP8	HGNC:1509
ENSG00000170558.9	2976.95	0.623127	0.11372	6.69303e-09	1.78013e-07	OTTHUMG00000059940.12	CDH2	HGNC:1759
ENSG00000197258.5	80.0954	-1.37887	0.258471	6.71567e-09	1.78356e-07	OTTHUMG00000157274.1	EIF4BP6	HGNC:37939
ENSG00000158966.16	1871.96	0.586215	0.106607	6.7866e-09	1.79978e-07	OTTHUMG00000009030.7	CACHD1	HGNC:29314
ENSG00000186310.10	366.117	-0.769642	0.142222	7.03948e-09	1.85607e-07	OTTHUMG00000021974.3	NAP1L3	HGNC:7639
ENSG00000179862.7	79.5009	-1.26538	0.237478	7.18123e-09	1.89071e-07	OTTHUMG00000007728.2	CITED4	HGNC:18696
ENSG00000130224.15	808.979	0.840637	0.155869	7.26979e-09	1.91128e-07	OTTHUMG00000022233.4	LRCH2	HGNC:29292
ENSG00000151065.14	738.66	-0.804801	0.149179	7.39521e-09	1.94145e-07	OTTHUMG00000168113.4	DCP1B	HGNC:24451
ENSG00000143224.18	517.218	-0.689403	0.126953	7.51681e-09	1.97055e-07	OTTHUMG00000034342.4	PPOX	HGNC:9280
ENSG00000077274.9	38.5993	1.91159	0.360324	7.75579e-09	2.02805e-07	OTTHUMG00000022203.2	CAPN6	HGNC:1483
ENSG00000225663.8	1295.4	-0.893928	0.167276	8.14439e-09	2.11986e-07	OTTHUMG00000177915.2	MCRIP1	HGNC:28007
ENSG00000141576.16	1448.31	-0.596946	0.109881	8.63683e-09	2.23214e-07	OTTHUMG00000132627.6	RNF157	HGNC:29402
ENSG00000128594.8	86.3956	1.09511	0.206107	8.84899e-09	2.28374e-07	OTTHUMG00000157563.4	LRRC4	HGNC:15586
ENSG00000141540.11	708.093	-0.681894	0.126374	8.86402e-09	2.28439e-07	OTTHUMG00000166018.4	TTYH2	HGNC:13877
ENSG00000105357.18	2073.31	-0.589976	0.108481	9.06941e-09	2.33075e-07	OTTHUMG00000183034.7	MYH14	HGNC:23212
ENSG00000160446.19	515.471	-0.678313	0.125692	9.05892e-09	2.33075e-07	OTTHUMG00000020756.5	ZDHHC12	HGNC:19159
ENSG00000105640.13	15799.8	-0.731113	0.134936	9.64386e-09	2.46796e-07	OTTHUMG00000183445.3	RPL18A	HGNC:10311
ENSG00000008988.9	8625.5	-0.746729	0.139363	9.7561e-09	2.49319e-07	OTTHUMG00000164297.1	RPS20	HGNC:10405
ENSG00000181396.13	967.665	-0.637569	0.117974	9.82279e-09	2.50458e-07	OTTHUMG00000178679.5	OGFOD3	HGNC:26174
ENSG00000263235.1	28.0395	1.97724	0.375764	1.01724e-08	2.58873e-07	OTTHUMG00000177736.1	AC006111.2
ENSG00000115884.11	691.228	-0.694407	0.129205	1.05073e-08	2.67022e-07	OTTHUMG00000090751.5	SDC1	HGNC:10658
ENSG00000175868.14	1972.27	0.830571	0.156033	1.05465e-08	2.67647e-07	OTTHUMG00000164629.24	CALCB	HGNC:1438
ENSG00000177570.14	112.897	1.01785	0.192519	1.08174e-08	2.73762e-07	OTTHUMG00000059817.6	SAMD12	HGNC:31750
ENSG00000188729.6	68.8491	1.48023	0.28361	1.09413e-08	2.76513e-07	OTTHUMG00000156190.2	OSTN	HGNC:29961
ENSG00000090238.12	359.115	-0.839809	0.158008	1.09966e-08	2.77528e-07	OTTHUMG00000176853.2	YPEL3	HGNC:18327
ENSG00000173137.12	170.757	-0.919078	0.173911	1.10651e-08	2.7887e-07	OTTHUMG00000165190.6	ADCK5	HGNC:21738
ENSG00000229124.7	117.04	-1.07191	0.204001	1.18412e-08	2.96388e-07	OTTHUMG00000017743.4	VIM-AS1	HGNC:44879
ENSG00000248932.6	111.346	-1.01648	0.192861	1.20223e-08	3.00509e-07	OTTHUMG00000159955.7	AC046134.2
ENSG00000148832.16	101.598	-1.06874	0.203214	1.21175e-08	3.02475e-07	OTTHUMG00000019318.5	PAOX	HGNC:20837
ENSG00000131845.14	270.869	0.646034	0.120668	1.3087e-08	3.25784e-07	OTTHUMG00000183245.1	AC005261.1
ENSG00000178038.17	164.743	-1.04453	0.200208	1.33078e-08	3.30382e-07	OTTHUMG00000128673.8	ALS2CL	HGNC:20605
ENSG00000106261.17	1649.85	-0.619315	0.115608	1.34347e-08	3.32626e-07	OTTHUMG00000156534.4	ZKSCAN1	HGNC:13101
ENSG00000019549.13	1407.11	-0.726335	0.136823	1.35664e-08	3.34981e-07	OTTHUMG00000149912.9	SNAI2	HGNC:11094
ENSG00000160410.15	1393.59	-0.667773	0.125197	1.36003e-08	3.35363e-07	OTTHUMG00000182602.11	SHKBP1	HGNC:19214
ENSG00000181788.4	963.488	0.61844	0.115543	1.37647e-08	3.38505e-07	OTTHUMG00000159847.3	SIAH2	HGNC:10858
ENSG00000230207.1	29.8831	-2.70296	0.511286	1.40405e-08	3.44822e-07	OTTHUMG00000019537.1	RPL4P5	HGNC:35699
ENSG00000183979.8	37.0628	2.28215	0.441584	1.41174e-08	3.46245e-07	OTTHUMG00000177983.3	NPB	HGNC:30099
ENSG00000166189.8	614.487	-0.595826	0.111244	1.41993e-08	3.47323e-07	OTTHUMG00000018945.3	HPS6	HGNC:18817
ENSG00000198380.12	1695.22	0.602195	0.112406	1.43423e-08	3.50351e-07	OTTHUMG00000152666.4	GFPT1	HGNC:4241
ENSG00000010361.14	878.009	-0.626813	0.117313	1.45077e-08	3.53447e-07	OTTHUMG00000167281.4	FUZ	HGNC:26219
ENSG00000213694.5	198.601	0.833703	0.158296	1.46975e-08	3.57117e-07	OTTHUMG00000020173.3	S1PR3	HGNC:3167
ENSG00000170801.10	377.662	-0.820932	0.155837	1.48338e-08	3.59951e-07	OTTHUMG00000090561.6	HTRA3	HGNC:30406
ENSG00000167969.13	1683.07	-0.711667	0.13456	1.49274e-08	3.61742e-07	OTTHUMG00000128830.5	ECI1	HGNC:2703
ENSG00000100300.18	709.193	-0.739233	0.14004	1.57951e-08	3.81757e-07	OTTHUMG00000150573.9	TSPO	HGNC:1158
ENSG00000204196.5	71.2206	-1.70029	0.328937	1.64089e-08	3.96068e-07	OTTHUMG00000155492.1	RPL12P16	HGNC:36926
ENSG00000165644.11	544.339	-0.907005	0.173795	1.64396e-08	3.96285e-07	OTTHUMG00000018518.3	COMTD1	HGNC:26309
ENSG00000170396.8	318.305	0.850673	0.162717	1.66922e-08	4.01845e-07	OTTHUMG00000132625.2	ZNF804A	HGNC:21711
ENSG00000114209.15	1070.17	0.675077	0.127586	1.70729e-08	4.09928e-07	OTTHUMG00000158415.6	PDCD10	HGNC:8761
ENSG00000117318.9	1059.52	-1.0333	0.199298	1.71536e-08	4.10842e-07	OTTHUMG00000003229.3	ID3	HGNC:5362
ENSG00000111186.13	186.757	-0.90642	0.17411	1.75283e-08	4.19211e-07	OTTHUMG00000090375.4	WNT5B	HGNC:16265
ENSG00000198406.7	263.824	1.07715	0.208366	1.76399e-08	4.21329e-07	OTTHUMG00000159328.2	BZW1P2	HGNC:33954
ENSG00000177108.5	398.925	-0.585294	0.110107	1.7903e-08	4.27053e-07	OTTHUMG00000171575.3	ZDHHC22	HGNC:20106
ENSG00000111727.12	358.389	0.69869	0.132533	1.79811e-08	4.28359e-07	OTTHUMG00000170175.4	HCFC2	HGNC:24972
ENSG00000164930.12	509.953	0.659222	0.124991	1.81193e-08	4.30733e-07	OTTHUMG00000164840.3	FZD6	HGNC:4044
ENSG00000174640.15	96.8281	-1.17804	0.228342	1.84876e-08	4.38708e-07	OTTHUMG00000159745.6	SLCO2A1	HGNC:10955
ENSG00000006712.15	4115.31	0.607721	0.114769	1.93551e-08	4.58104e-07	OTTHUMG00000182968.3	PAF1	HGNC:25459
ENSG00000228594.4	949.428	-0.61356	0.115934	1.965e-08	4.63881e-07	OTTHUMG00000154864.5	FNDC10	HGNC:42951
ENSG00000142619.4	61.4665	-1.60414	0.313809	1.98503e-08	4.68007e-07	OTTHUMG00000002373.1	PADI3	HGNC:18337
ENSG00000184575.12	8036.15	0.830111	0.158706	2.07572e-08	4.87338e-07	OTTHUMG00000168794.4	XPOT	HGNC:12826
ENSG00000059728.11	256.714	0.876717	0.169528	2.15061e-08	5.02507e-07	OTTHUMG00000129646.5	MXD1	HGNC:6761
ENSG00000127314.18	3666.51	0.62733	0.119228	2.22599e-08	5.18793e-07	OTTHUMG00000133660.8	RAP1B	HGNC:9857
ENSG00000129219.14	756.028	-0.689657	0.131825	2.23773e-08	5.20863e-07	OTTHUMG00000090779.7	PLD2	HGNC:9068
ENSG00000126934.13	3794.85	-0.624199	0.118662	2.25644e-08	5.24551e-07	OTTHUMG00000134286.6	MAP2K2	HGNC:6842
ENSG00000228794.10	500.259	0.59528	0.112829	2.28828e-08	5.31275e-07	OTTHUMG00000196004.1	LINC01128	HGNC:49377
ENSG00000240086.7	101.212	-1.22711	0.241581	2.324e-08	5.38885e-07	OTTHUMG00000159842.6	AC092969.1
ENSG00000117691.10	766.25	-0.702245	0.1348	2.37437e-08	5.49866e-07	OTTHUMG00000036744.5	NENF	HGNC:30384
ENSG00000168542.15	150.645	1.1185	0.219162	2.42673e-08	5.60571e-07	OTTHUMG00000132648.7	COL3A1	HGNC:2201
ENSG00000115461.5	1205.16	0.61635	0.117538	2.50861e-08	5.75995e-07	OTTHUMG00000133058.4	IGFBP5	HGNC:5474
ENSG00000125246.15	167.157	-0.908676	0.176848	2.51047e-08	5.75995e-07	OTTHUMG00000017278.3	CLYBL	HGNC:18355
ENSG00000168389.17	128.566	0.832052	0.161002	2.51452e-08	5.75995e-07	OTTHUMG00000009293.2	MFSD2A	HGNC:25897
ENSG00000272556.2	680.43	-0.707123	0.13605	2.51692e-08	5.75995e-07	OTTHUMG00000155422.2	GTF2IP13	HGNC:51725
ENSG00000204681.11	1764.05	-0.646415	0.124062	2.586e-08	5.90643e-07	OTTHUMG00000031095.9	GABBR1	HGNC:4070
ENSG00000109534.17	1235.46	0.708783	0.136459	2.6446e-08	6.01945e-07	OTTHUMG00000161108.6	GAR1	HGNC:14264
ENSG00000163362.11	224.395	-0.8358	0.162536	2.64037e-08	6.01945e-07	OTTHUMG00000035789.12	INAVA	HGNC:25599
ENSG00000164116.16	288.629	0.807806	0.156462	2.64537e-08	6.01945e-07	OTTHUMG00000161700.3	GUCY1A1	HGNC:4685
ENSG00000167702.12	1017.42	-0.592104	0.112843	2.67382e-08	6.06907e-07	OTTHUMG00000165133.6	KIFC2	HGNC:29530
ENSG00000171790.15	88.3313	1.13145	0.22199	2.76369e-08	6.24205e-07	OTTHUMG00000005719.1	SLFNL1	HGNC:26313
ENSG00000167281.19	320.033	-0.634364	0.121151	2.77605e-08	6.25451e-07	OTTHUMG00000150183.10	RBFOX3	HGNC:27097
ENSG00000075826.17	746.445	-0.677534	0.130514	2.84599e-08	6.40419e-07	OTTHUMG00000019342.5	SEC31B	HGNC:23197
ENSG00000134108.13	1190.26	-0.602521	0.115292	2.87924e-08	6.47104e-07	OTTHUMG00000090463.5	ARL8B	HGNC:25564
ENSG00000119844.15	676.045	0.694042	0.134009	2.8897e-08	6.48656e-07	OTTHUMG00000129539.6	AFTPH	HGNC:25951
ENSG00000100181.22	90.9592	-4.53095	0.825527	2.89362e-08	6.4874e-07	OTTHUMG00000191859.4	TPTEP1	HGNC:43648
ENSG00000126091.20	420.147	-0.721914	0.139867	2.93958e-08	6.58234e-07	OTTHUMG00000007561.18	ST3GAL3	HGNC:10866
ENSG00000149260.18	312.998	-0.855755	0.167296	2.97066e-08	6.62757e-07	OTTHUMG00000165192.7	CAPN5	HGNC:1482
ENSG00000089048.14	2158.04	0.653961	0.125968	3.04045e-08	6.76675e-07	OTTHUMG00000031906.1	ESF1	HGNC:15898
ENSG00000135521.9	3289.26	0.628327	0.120841	3.12442e-08	6.93674e-07	OTTHUMG00000015733.2	LTV1	HGNC:21173
ENSG00000172830.13	765.136	-0.718123	0.139373	3.15818e-08	7.00319e-07	OTTHUMG00000167105.4	SSH3	HGNC:30581
ENSG00000186446.12	18.4287	-2.62678	0.516934	3.16855e-08	7.01766e-07	OTTHUMG00000133048.6	ZNF501	HGNC:23717
ENSG00000198796.7	78.2089	2.15034	0.430319	3.30104e-08	7.30224e-07	OTTHUMG00000132755.3	ALPK2	HGNC:20565
ENSG00000072274.13	2962.43	0.959167	0.188948	3.33271e-08	7.3634e-07	OTTHUMG00000155714.3	TFRC	HGNC:11763
ENSG00000050767.17	81.133	-1.31657	0.261119	3.40485e-08	7.49558e-07	OTTHUMG00000130890.5	COL23A1	HGNC:22990
ENSG00000148834.13	754.978	-0.740438	0.144433	3.54061e-08	7.73852e-07	OTTHUMG00000019001.3	GSTO1	HGNC:13312
ENSG00000006025.12	445.394	-0.763581	0.149345	3.60778e-08	7.8759e-07	OTTHUMG00000178288.2	OSBPL7	HGNC:16387
ENSG00000135596.18	441.732	-0.640494	0.124281	3.78715e-08	8.24778e-07	OTTHUMG00000015350.9	MICAL1	HGNC:20619
ENSG00000135519.8	82.9669	-1.20649	0.240637	3.79193e-08	8.24836e-07	OTTHUMG00000169517.6	KCNH3	HGNC:6252
ENSG00000096070.19	1621.68	0.709236	0.138435	3.81937e-08	8.29233e-07	OTTHUMG00000014589.8	BRPF3	HGNC:14256
ENSG00000233762.3	15.9896	-3.67271	0.709508	3.82122e-08	8.29233e-07	OTTHUMG00000154086.1	AC007969.1
ENSG00000149823.9	2565.68	-0.597775	0.115544	3.83755e-08	8.30802e-07	OTTHUMG00000165600.3	VPS51	HGNC:1172
ENSG00000167107.12	975.539	-0.648115	0.126155	4.00315e-08	8.63583e-07	OTTHUMG00000162128.5	ACSF2	HGNC:26101
ENSG00000113319.13	274.044	0.644817	0.125564	4.05219e-08	8.73133e-07	OTTHUMG00000119015.6	RASGRF2	HGNC:9876
ENSG00000214279.13	220.171	-1.19949	0.240951	4.11262e-08	8.84068e-07	OTTHUMG00000019326.5	SCART1	HGNC:32411
ENSG00000213347.10	517.698	-0.729155	0.142974	4.2123e-08	9.0337e-07	OTTHUMG00000130854.3	MXD3	HGNC:14008
ENSG00000132164.10	306.315	-0.63374	0.123594	4.32873e-08	9.27158e-07	OTTHUMG00000129718.3	SLC6A11	HGNC:11044
ENSG00000101745.17	541.546	0.843513	0.167024	4.39232e-08	9.37576e-07	OTTHUMG00000131595.7	ANKRD12	HGNC:29135
ENSG00000124067.17	770.218	-0.760894	0.149992	4.41332e-08	9.39862e-07	OTTHUMG00000137535.12	SLC12A4	HGNC:10913
ENSG00000174498.14	521.773	-0.82832	0.164145	4.4103e-08	9.39862e-07	OTTHUMG00000133137.4	IGDCC3	HGNC:9700
ENSG00000103241.7	443.456	-0.625738	0.122063	4.57712e-08	9.70221e-07	OTTHUMG00000137651.5	FOXF1	HGNC:3809
ENSG00000103154.9	143.229	-0.873322	0.173165	4.64441e-08	9.82207e-07	OTTHUMG00000137636.3	NECAB2	HGNC:23746
ENSG00000181408.3	133.316	-0.926552	0.184359	4.7813e-08	1.00766e-06	OTTHUMG00000178835.1	UTS2R	HGNC:4468
ENSG00000109738.11	142.432	0.863973	0.17172	4.80528e-08	1.01038e-06	OTTHUMG00000161954.2	GLRB	HGNC:4329
ENSG00000179406.8	573.545	-0.711164	0.140081	4.84865e-08	1.01833e-06	OTTHUMG00000156595.3	LINC00174	HGNC:27788
ENSG00000112306.8	6678.78	-0.804103	0.160367	4.91454e-08	1.0298e-06	OTTHUMG00000015593.4	RPS12	HGNC:10385
ENSG00000213904.9	96.7695	-1.13868	0.22928	4.96865e-08	1.03995e-06	OTTHUMG00000182815.4	LIPE-AS1	HGNC:48589
ENSG00000169231.13	402.322	-0.702604	0.138605	4.99275e-08	1.04379e-06	OTTHUMG00000035710.4	THBS3	HGNC:11787
ENSG00000203724.11	27.9515	-1.8531	0.374597	5.10822e-08	1.06671e-06	OTTHUMG00000035659.2	C1orf53	HGNC:30003
ENSG00000206417.8	61.9642	-1.37689	0.279068	5.14277e-08	1.0727e-06	OTTHUMG00000159459.4	H1FX-AS1	HGNC:27953
ENSG00000141337.12	217.173	-0.799906	0.159196	5.16533e-08	1.07618e-06	OTTHUMG00000179810.6	ARSG	HGNC:24102
ENSG00000140057.9	121.639	-1.11409	0.225598	5.42756e-08	1.12568e-06	OTTHUMG00000171421.2	AK7	HGNC:20091
ENSG00000131469.14	11235.1	-0.925957	0.185739	5.50825e-08	1.14112e-06	OTTHUMG00000180660.4	RPL27	HGNC:10328
ENSG00000196812.5	110.98	1.14769	0.231904	5.52527e-08	1.14335e-06	OTTHUMG00000014509.2	ZSCAN16	HGNC:20813
ENSG00000123570.4	177.163	0.741691	0.147045	5.59104e-08	1.15435e-06	OTTHUMG00000022112.2	RAB9B	HGNC:14090
ENSG00000107672.15	2009.12	-0.590909	0.115958	5.93153e-08	1.22326e-06	OTTHUMG00000019180.2	NSMCE4A	HGNC:25935
ENSG00000121454.6	328.33	0.707385	0.140372	5.95399e-08	1.22651e-06	OTTHUMG00000035115.4	LHX4	HGNC:21734
ENSG00000242028.6	250.393	1.02661	0.20745	6.00446e-08	1.23412e-06	OTTHUMG00000060146.7	HYPK	HGNC:18418
ENSG00000203791.15	288.399	-0.589679	0.115989	6.19148e-08	1.26828e-06	OTTHUMG00000019217.6	EEF1AKMT2	HGNC:33787
ENSG00000224578.5	1390.67	-0.718287	0.14332	6.18787e-08	1.26828e-06	OTTHUMG00000173250.2	HNRNPA1P48	HGNC:48778
ENSG00000184702.20	1068.69	-1.05532	0.214106	6.23611e-08	1.27599e-06	OTTHUMG00000150399.9	SEPTIN5	HGNC:9164
ENSG00000196458.11	478.343	0.897101	0.180505	6.26128e-08	1.27971e-06	OTTHUMG00000167934.4	ZNF605	HGNC:28068
ENSG00000143537.13	2161.07	-0.613366	0.121012	6.35523e-08	1.29524e-06	OTTHUMG00000013898.5	ADAM15	HGNC:193
ENSG00000121680.16	325.044	-0.771254	0.154081	6.37239e-08	1.29662e-06	OTTHUMG00000167005.2	PEX16	HGNC:8857
ENSG00000187730.9	89.1306	-1.01867	0.206486	6.52821e-08	1.32537e-06	OTTHUMG00000041064.6	GABRD	HGNC:4084
ENSG00000227128.5	314.133	-0.646901	0.128133	6.59301e-08	1.33408e-06	OTTHUMG00000170500.4	LBX1-AS1	HGNC:48678
ENSG00000153132.13	1063.52	0.755794	0.151164	6.62243e-08	1.33855e-06	OTTHUMG00000133414.4	CLGN	HGNC:2060
ENSG00000177519.4	76.6297	1.19583	0.243581	6.63764e-08	1.34014e-06	OTTHUMG00000131905.2	RPRM	HGNC:24201
ENSG00000029363.17	13035.5	0.613432	0.120956	6.79851e-08	1.36757e-06	OTTHUMG00000033323.8	BCLAF1	HGNC:16863
ENSG00000129596.5	228.74	0.854951	0.172359	6.87311e-08	1.37941e-06	OTTHUMG00000128891.4	CDO1	HGNC:1795
ENSG00000004866.20	740.298	0.594422	0.117396	6.96531e-08	1.39398e-06	OTTHUMG00000023888.24	ST7	HGNC:11351
ENSG00000137101.13	113.7	-1.18358	0.241252	7.06473e-08	1.40617e-06	OTTHUMG00000019870.2	CD72	HGNC:1696
ENSG00000163322.14	409.4	-0.726167	0.145231	7.15182e-08	1.42196e-06	OTTHUMG00000130429.18	ABRAXAS1	HGNC:25829
ENSG00000125652.8	353.384	-0.78929	0.1585	7.22293e-08	1.43454e-06	OTTHUMG00000180792.3	ALKBH7	HGNC:21306
ENSG00000132010.16	11.8051	-7.23266	2.60413	7.25184e-08	1.43648e-06	OTTHUMG00000156409.4	ZNF20	HGNC:12992
ENSG00000087842.11	430.752	-0.644155	0.128058	7.34994e-08	1.45324e-06	OTTHUMG00000021176.2	PIR	HGNC:30048
ENSG00000107614.22	389.847	-0.741102	0.148656	7.35685e-08	1.45324e-06	OTTHUMG00000017745.13	TRDMT1	HGNC:2977
ENSG00000163694.15	179.945	0.831174	0.168063	7.70275e-08	1.51828e-06	OTTHUMG00000128598.5	RBM47	HGNC:30358
ENSG00000237441.10	674.185	-0.627367	0.124856	7.71167e-08	1.5184e-06	OTTHUMG00000031072.5	RGL2	HGNC:9769
ENSG00000101986.12	410.919	-0.611889	0.121647	8.00426e-08	1.57157e-06	OTTHUMG00000024215.4	ABCD1	HGNC:61
ENSG00000197467.15	284.413	-0.671392	0.134419	8.09448e-08	1.58188e-06	OTTHUMG00000018394.24	COL13A1	HGNC:2190
ENSG00000056097.16	4765.89	0.65667	0.130652	8.11623e-08	1.5844e-06	OTTHUMG00000161979.2	ZFR	HGNC:17277
ENSG00000008300.17	646.283	0.685615	0.137513	8.27906e-08	1.61188e-06	OTTHUMG00000133544.3	CELSR3	HGNC:3230
ENSG00000144935.15	336.132	-0.72356	0.145866	8.28344e-08	1.61188e-06	OTTHUMG00000159301.3	TRPC1	HGNC:12333
ENSG00000156113.23	74.1882	-1.21751	0.250294	8.37052e-08	1.62709e-06	OTTHUMG00000018543.33	KCNMA1	HGNC:6284
ENSG00000198157.11	2228.29	0.798655	0.161277	8.44489e-08	1.63884e-06	OTTHUMG00000021911.3	HMGN5	HGNC:8013
ENSG00000146540.15	2364.86	-0.651661	0.130456	8.79699e-08	1.69735e-06	OTTHUMG00000151477.7	C7orf50	HGNC:22421
ENSG00000154079.6	107.838	-0.932084	0.190566	8.79005e-08	1.69735e-06	OTTHUMG00000014992.2	SDHAF4	HGNC:20957
ENSG00000160818.16	4639.72	0.654501	0.131374	8.9029e-08	1.71236e-06	OTTHUMG00000033203.4	GPATCH4	HGNC:25982
ENSG00000130254.12	3660.45	0.610501	0.121899	8.93782e-08	1.71726e-06	OTTHUMG00000180374.5	SAFB2	HGNC:21605
ENSG00000267296.2	211.568	-0.775002	0.157229	9.08334e-08	1.74339e-06	OTTHUMG00000180429.2	CEBPA-DT	HGNC:25710
ENSG00000198464.14	524.188	0.762786	0.154628	9.17699e-08	1.75767e-06	OTTHUMG00000157507.5	ZNF480	HGNC:23305
ENSG00000139190.16	635.207	-0.756891	0.153553	9.28161e-08	1.77399e-06	OTTHUMG00000168269.2	VAMP1	HGNC:12642
ENSG00000234545.8	1195.03	0.657202	0.132098	9.68839e-08	1.8498e-06	OTTHUMG00000155863.10	FAM133B	HGNC:28629
ENSG00000099617.4	107.207	-1.08545	0.224455	9.74144e-08	1.85799e-06	OTTHUMG00000180148.4	EFNA2	HGNC:3222
ENSG00000174939.11	81.0553	-1.12117	0.232323	9.8152e-08	1.86816e-06	OTTHUMG00000132121.8	ASPHD1	HGNC:27380
ENSG00000117500.13	2489.61	0.615109	0.123503	1.00136e-07	1.90394e-06	OTTHUMG00000010162.5	TMED5	HGNC:24251
ENSG00000204498.11	997.528	-0.594163	0.119033	1.00683e-07	1.91234e-06	OTTHUMG00000031038.5	NFKBIL1	HGNC:7800
ENSG00000197948.11	527.24	-0.647802	0.130697	1.02566e-07	1.9461e-06	OTTHUMG00000163762.5	FCHSD1	HGNC:25463
ENSG00000134013.16	635.538	-0.798766	0.163537	1.08681e-07	2.04935e-06	OTTHUMG00000163797.6	LOXL2	HGNC:6666
ENSG00000224114.1	44.3584	-1.91645	0.398409	1.08615e-07	2.04935e-06	OTTHUMG00000036341.2	AL591846.2
ENSG00000156587.16	319.337	-0.786465	0.160771	1.09275e-07	2.0563e-06	OTTHUMG00000167047.3	UBE2L6	HGNC:12490
ENSG00000081479.15	596.412	0.621841	0.12535	1.10138e-07	2.07042e-06	OTTHUMG00000132179.5	LRP2	HGNC:6694
ENSG00000131871.15	1083.49	0.608003	0.122584	1.15256e-07	2.15554e-06	OTTHUMG00000166441.6	SELENOS	HGNC:30396
ENSG00000197457.10	814.099	-0.718578	0.146687	1.19368e-07	2.22608e-06	OTTHUMG00000032985.3	STMN3	HGNC:15926
ENSG00000272983.1	87.3135	-1.15647	0.241707	1.19394e-07	2.22608e-06	OTTHUMG00000186215.1	AL117339.4
ENSG00000184584.13	243.585	0.769423	0.15778	1.20481e-07	2.24407e-06	OTTHUMG00000129239.22	STING1	HGNC:27962
ENSG00000144713.13	12363.1	-0.813939	0.167499	1.20712e-07	2.24607e-06	OTTHUMG00000129804.5	RPL32	HGNC:10336
ENSG00000163395.17	48.4183	1.31496	0.275651	1.24474e-07	2.31372e-06	OTTHUMG00000035728.6	IGFN1	HGNC:24607
ENSG00000138061.12	192.729	0.913799	0.189839	1.31273e-07	2.4253e-06	OTTHUMG00000100970.9	CYP1B1	HGNC:2597
ENSG00000106665.16	466.23	-0.825701	0.170847	1.31449e-07	2.42609e-06	OTTHUMG00000022980.5	CLIP2	HGNC:2586
ENSG00000114391.13	15735.5	-0.828433	0.171807	1.32489e-07	2.44283e-06	OTTHUMG00000159146.4	RPL24	HGNC:10325
ENSG00000121931.16	663.483	0.64349	0.131086	1.3446e-07	2.47666e-06	OTTHUMG00000011913.4	LRIF1	HGNC:30299
ENSG00000204257.15	80.3655	-1.1621	0.24435	1.38922e-07	2.55627e-06	OTTHUMG00000031173.9	HLA-DMA	HGNC:4934
ENSG00000084207.18	6340.59	-0.759204	0.157062	1.43364e-07	2.6327e-06	OTTHUMG00000137430.5	GSTP1	HGNC:4638
ENSG00000137726.17	652.056	-0.656856	0.13414	1.4389e-07	2.63972e-06	OTTHUMG00000166991.5	FXYD6	HGNC:4030
ENSG00000182472.9	31.7216	-1.91663	0.409617	1.48628e-07	2.71574e-06	OTTHUMG00000182525.3	CAPN12	HGNC:13249
ENSG00000186432.9	2325.08	0.615582	0.124917	1.48433e-07	2.71574e-06	OTTHUMG00000159033.3	KPNA4	HGNC:6397
ENSG00000241506.1	234.286	0.741913	0.15384	1.67472e-07	3.02976e-06	OTTHUMG00000158743.1	PSMC1P1	HGNC:30147
ENSG00000244716.3	417.021	-0.815849	0.170116	1.67733e-07	3.03148e-06	OTTHUMG00000057601.1	BX679664.3
ENSG00000174749.6	497.879	0.615471	0.126261	1.6973e-07	3.06453e-06	OTTHUMG00000132851.3	FAM241A	HGNC:26813
ENSG00000095321.17	1055.14	-0.607519	0.124825	1.73487e-07	3.1262e-06	OTTHUMG00000147343.6	CRAT	HGNC:2342
ENSG00000137218.10	192.205	-0.751194	0.156289	1.77742e-07	3.19656e-06	OTTHUMG00000014686.6	FRS3	HGNC:16970
ENSG00000214389.2	84.7074	-1.34917	0.287003	1.80504e-07	3.24304e-06	OTTHUMG00000154287.1	RPS3AP26	HGNC:36513
ENSG00000233276.5	4288.57	-0.717358	0.149444	1.90764e-07	3.4106e-06	OTTHUMG00000156837.7	GPX1	HGNC:4553
ENSG00000117477.12	474.55	0.64104	0.132494	1.95899e-07	3.49202e-06	OTTHUMG00000035448.4	CCDC181	HGNC:28051
ENSG00000171858.18	1780.47	-0.982469	0.208757	1.98957e-07	3.53743e-06	OTTHUMG00000032915.3	RPS21	HGNC:10409
ENSG00000171703.17	489.195	-0.705885	0.147168	2.04235e-07	3.61607e-06	OTTHUMG00000033026.4	TCEA2	HGNC:11614
ENSG00000104067.16	2551.85	0.624133	0.128879	2.1055e-07	3.71706e-06	OTTHUMG00000137397.7	TJP1	HGNC:11827
ENSG00000164506.14	520.393	0.671765	0.139946	2.1459e-07	3.78109e-06	OTTHUMG00000015766.4	STXBP5	HGNC:19665
ENSG00000087085.15	128.006	-0.855091	0.181036	2.20102e-07	3.8596e-06	OTTHUMG00000157033.10	ACHE	HGNC:108
ENSG00000142303.14	248.006	-0.840417	0.177486	2.20633e-07	3.86521e-06	OTTHUMG00000182216.9	ADAMTS10	HGNC:13201
ENSG00000243004.6	154.407	-1.11113	0.237484	2.2092e-07	3.86652e-06	OTTHUMG00000152535.2	AC005062.1
ENSG00000178026.13	403.734	-0.665763	0.1389	2.26234e-07	3.95277e-06	OTTHUMG00000150729.2	LRRC75B	HGNC:33155
ENSG00000183098.11	950.053	-0.671643	0.140488	2.27927e-07	3.97773e-06	OTTHUMG00000017205.5	GPC6	HGNC:4454
ENSG00000226415.1	23.1966	-2.37992	0.513507	2.34541e-07	4.08147e-06	OTTHUMG00000009616.1	TPI1P1	HGNC:35449
ENSG00000285897.1	20.6485	6.93507	2.40649	2.47834e-07	4.30458e-06	OTTHUMG00000179077.3	AC004687.2
ENSG00000133315.11	652.338	-0.739515	0.155926	2.51041e-07	4.35201e-06	OTTHUMG00000167843.3	MACROD1	HGNC:29598
ENSG00000078319.9	173.961	-0.738024	0.156934	2.53388e-07	4.38853e-06	OTTHUMG00000156885.3	PMS2P1	HGNC:9123
ENSG00000122482.21	2382.94	0.632344	0.131902	2.54413e-07	4.40111e-06	OTTHUMG00000010078.5	ZNF644	HGNC:29222
ENSG00000166924.9	79.5288	-1.08691	0.23419	2.54596e-07	4.40111e-06	OTTHUMG00000155290.4	NYAP1	HGNC:22009
ENSG00000206337.12	213.529	0.699794	0.147221	2.56055e-07	4.41798e-06	OTTHUMG00000031282.7	HCP5	HGNC:21659
ENSG00000104881.16	336.101	-0.912808	0.195351	2.57831e-07	4.44442e-06	OTTHUMG00000181784.3	PPP1R13L	HGNC:18838
ENSG00000138131.4	199.079	-0.893837	0.19112	2.59212e-07	4.46401e-06	OTTHUMG00000018874.2	LOXL4	HGNC:17171
ENSG00000163975.12	553.913	-0.598466	0.124849	2.60338e-07	4.47497e-06	OTTHUMG00000155518.3	MELTF	HGNC:7037
ENSG00000276805.2	174.543	-0.885514	0.189922	2.61107e-07	4.48397e-06	OTTHUMG00000191561.2	AL133216.2
ENSG00000101298.15	186.513	0.746326	0.157971	2.65649e-07	4.55769e-06	OTTHUMG00000031662.5	SNPH	HGNC:15931
ENSG00000100968.14	887.086	-0.686913	0.14451	2.66505e-07	4.56808e-06	OTTHUMG00000029351.13	NFATC4	HGNC:7778
ENSG00000188846.14	15823.4	-0.663647	0.139333	2.72385e-07	4.6645e-06	OTTHUMG00000156046.7	RPL14	HGNC:10305
ENSG00000090539.15	147.222	-0.849931	0.181732	2.75837e-07	4.71477e-06	OTTHUMG00000141267.2	CHRD	HGNC:1949
ENSG00000185404.16	15.2561	2.5224	0.54528	2.77857e-07	4.74486e-06	OTTHUMG00000153730.3	SP140L	HGNC:25105
ENSG00000181513.14	364.53	-0.605285	0.12661	2.82658e-07	4.81785e-06	OTTHUMG00000180111.2	ACBD4	HGNC:23337
ENSG00000183196.10	86.4675	-1.03776	0.223547	2.83197e-07	4.82253e-06	OTTHUMG00000137612.6	CHST6	HGNC:6938
ENSG00000161082.13	102.215	-0.987498	0.212184	2.83515e-07	4.82346e-06	OTTHUMG00000180693.3	CELF5	HGNC:14058
ENSG00000133794.18	279.031	0.793544	0.168952	2.88111e-07	4.89708e-06	OTTHUMG00000150623.9	ARNTL	HGNC:701
ENSG00000204253.4	60.7167	-1.33026	0.289609	2.96215e-07	5.00688e-06	OTTHUMG00000154452.1	HNRNPCP2	HGNC:48814
ENSG00000180764.13	66.5459	-1.868	0.406135	2.9967e-07	5.05593e-06	OTTHUMG00000137480.3	PIPSL	HGNC:23733
ENSG00000250903.9	112.874	-0.970288	0.209934	2.9944e-07	5.05593e-06	OTTHUMG00000014120.6	GMDS-DT	HGNC:48993
ENSG00000125968.9	279.54	-0.820074	0.175409	3.02223e-07	5.08603e-06	OTTHUMG00000032181.2	ID1	HGNC:5360
ENSG00000132938.20	28.122	1.79411	0.392011	3.02289e-07	5.08603e-06	OTTHUMG00000016657.6	MTUS2	HGNC:20595
ENSG00000130511.16	1057.23	-0.744983	0.158533	3.04545e-07	5.11927e-06	OTTHUMG00000183362.10	SSBP4	HGNC:15676
ENSG00000196199.14	1340.8	0.601491	0.126662	3.06316e-07	5.1443e-06	OTTHUMG00000016498.4	MPHOSPH8	HGNC:29810
ENSG00000213300.5	439.796	0.794039	0.169736	3.07477e-07	5.15906e-06	OTTHUMG00000158819.1	HNRNPA3P6	HGNC:48495
ENSG00000250571.7	720.499	-0.602731	0.126588	3.08718e-07	5.17514e-06	OTTHUMG00000164952.8	GLI4	HGNC:4320
ENSG00000196517.12	807.81	0.941006	0.203585	3.17542e-07	5.31331e-06	OTTHUMG00000008294.4	SLC6A9	HGNC:11056
ENSG00000125827.9	1524.15	0.666054	0.140912	3.21567e-07	5.36029e-06	OTTHUMG00000031843.5	TMX4	HGNC:25237
ENSG00000144840.9	468.713	-0.648565	0.137052	3.21817e-07	5.36029e-06	OTTHUMG00000159668.2	RABL3	HGNC:18072
ENSG00000197448.14	2650.81	-0.609536	0.128711	3.21505e-07	5.36029e-06	OTTHUMG00000152637.8	GSTK1	HGNC:16906
ENSG00000170743.17	52.1742	1.35251	0.294355	3.26057e-07	5.4161e-06	OTTHUMG00000165499.3	SYT9	HGNC:19265
ENSG00000196456.13	353.396	-0.665998	0.141196	3.30499e-07	5.48491e-06	OTTHUMG00000191597.2	ZNF775	HGNC:28501
ENSG00000073150.14	371.97	-0.654484	0.138906	3.43918e-07	5.67667e-06	OTTHUMG00000044649.5	PANX2	HGNC:8600
ENSG00000123636.18	609.386	0.586965	0.123692	3.5532e-07	5.83849e-06	OTTHUMG00000132027.9	BAZ2B	HGNC:963
ENSG00000145220.14	2109.21	0.63024	0.133669	3.63826e-07	5.95683e-06	OTTHUMG00000125477.20	LYAR	HGNC:26021
ENSG00000166171.13	573.475	-0.896717	0.194633	3.70452e-07	6.05447e-06	OTTHUMG00000018934.3	DPCD	HGNC:24542
ENSG00000182809.10	88.3268	-1.09185	0.239654	3.80155e-07	6.20196e-06	OTTHUMG00000029906.5	CRIP2	HGNC:2361
ENSG00000186480.13	3654.03	0.760016	0.163424	3.88897e-07	6.32763e-06	OTTHUMG00000151330.6	INSIG1	HGNC:6083
ENSG00000205544.4	493.744	-1.09295	0.240566	4.05524e-07	6.57474e-06	OTTHUMG00000132900.4	TMEM256	HGNC:28618
ENSG00000140365.16	2002.45	-0.684728	0.146793	4.09252e-07	6.62931e-06	OTTHUMG00000142823.6	COMMD4	HGNC:26027
ENSG00000142765.18	178.853	-0.76877	0.166383	4.18899e-07	6.76757e-06	OTTHUMG00000005770.11	SYTL1	HGNC:15584
ENSG00000162244.12	13889	-0.710549	0.151954	4.19826e-07	6.77656e-06	OTTHUMG00000155262.7	RPL29	HGNC:10331
ENSG00000130643.9	73.2008	-1.37975	0.307049	4.34597e-07	7.00879e-06	OTTHUMG00000019310.3	CALY	HGNC:17938
ENSG00000006015.17	994.634	-0.631706	0.135047	4.37761e-07	7.04116e-06	OTTHUMG00000183112.1	REX1BD	HGNC:26098
ENSG00000085563.15	433.618	0.714246	0.154292	4.43278e-07	7.11629e-06	OTTHUMG00000023393.27	ABCB1	HGNC:40
ENSG00000159958.6	307.962	-0.766562	0.166941	4.53174e-07	7.25715e-06	OTTHUMG00000151271.2	TNFRSF13C	HGNC:17755
ENSG00000172575.12	99.1447	0.886103	0.193969	4.57888e-07	7.32467e-06	OTTHUMG00000172379.3	RASGRP1	HGNC:9878
ENSG00000240972.2	17281.6	-1.25469	0.280143	4.59371e-07	7.33068e-06	OTTHUMG00000150773.3	MIF	HGNC:7097
ENSG00000100288.19	731.955	-0.663702	0.142916	4.76235e-07	7.57994e-06	OTTHUMG00000150275.5	CHKB	HGNC:1938
ENSG00000125845.7	105.988	-1.24308	0.279314	4.82286e-07	7.66956e-06	OTTHUMG00000031833.4	BMP2	HGNC:1069
ENSG00000113763.12	113.707	-0.824913	0.181026	4.9333e-07	7.82476e-06	OTTHUMG00000163225.4	UNC5A	HGNC:12567
ENSG00000163703.18	552.051	-0.682164	0.147763	4.97653e-07	7.88649e-06	OTTHUMG00000195945.3	CRELD1	HGNC:14630
ENSG00000197763.17	266.434	-0.638657	0.137712	5.0081e-07	7.92101e-06	OTTHUMG00000162733.14	TXNRD3	HGNC:20667
ENSG00000137818.12	10880.8	-0.844686	0.185592	5.03119e-07	7.93868e-06	OTTHUMG00000172087.3	RPLP1	HGNC:10372
ENSG00000135709.12	304.823	0.658502	0.14221	5.04707e-07	7.95687e-06	OTTHUMG00000176597.2	KIAA0513	HGNC:29058
ENSG00000189283.10	119.026	-0.803429	0.176156	5.05354e-07	7.96019e-06	OTTHUMG00000158591.4	FHIT	HGNC:3701
ENSG00000182903.16	1123.2	0.652345	0.140817	5.15823e-07	8.10414e-06	OTTHUMG00000112450.7	ZNF721	HGNC:29425
ENSG00000110002.16	58.5062	-1.40273	0.314868	5.24889e-07	8.22536e-06	OTTHUMG00000165971.3	VWA5A	HGNC:6658
ENSG00000007264.15	830.537	-0.667143	0.144745	5.37249e-07	8.41184e-06	OTTHUMG00000180916.6	MATK	HGNC:6906
ENSG00000109063.15	200.121	0.830596	0.182329	5.3913e-07	8.43407e-06	OTTHUMG00000130367.6	MYH3	HGNC:7573
ENSG00000135953.11	344.26	0.601119	0.129151	5.40228e-07	8.44401e-06	OTTHUMG00000130781.4	MFSD9	HGNC:28158
ENSG00000260456.6	121.231	-0.927769	0.205186	5.4622e-07	8.51582e-06	OTTHUMG00000175680.1	C16orf95	HGNC:40033
ENSG00000183873.16	394.423	-0.663212	0.143875	5.51137e-07	8.57783e-06	OTTHUMG00000156166.6	SCN5A	HGNC:10593
ENSG00000106804.8	69.5548	-1.14832	0.257032	5.54835e-07	8.62804e-06	OTTHUMG00000020579.4	C5	HGNC:1331
ENSG00000226416.1	57.2959	-1.13688	0.25426	5.56152e-07	8.64116e-06	OTTHUMG00000012474.2	MRPL23-AS1	HGNC:42812
ENSG00000139200.13	219.334	-0.940489	0.208435	5.61015e-07	8.70931e-06	OTTHUMG00000168664.3	PIANP	HGNC:25338
ENSG00000172031.7	97.2307	1.10425	0.247592	5.73711e-07	8.8913e-06	OTTHUMG00000010114.2	EPHX4	HGNC:23758
ENSG00000169964.8	303.709	-0.616401	0.133047	5.78592e-07	8.95176e-06	OTTHUMG00000133092.3	TMEM42	HGNC:28444
ENSG00000148344.11	50.1516	-1.37221	0.309035	5.84349e-07	9.03319e-06	OTTHUMG00000020791.5	PTGES	HGNC:9599
ENSG00000153037.15	1357.08	0.727699	0.159261	5.85165e-07	9.03815e-06	OTTHUMG00000186064.6	SRP19	HGNC:11300
ENSG00000144290.17	12.434	2.61906	0.589191	5.89963e-07	9.10456e-06	OTTHUMG00000153938.6	SLC4A10	HGNC:13811
ENSG00000183023.18	324.34	0.739927	0.162435	5.92324e-07	9.13329e-06	OTTHUMG00000102183.9	SLC8A1	HGNC:11068
ENSG00000204389.10	268.711	-1.81165	0.415667	5.98548e-07	9.2137e-06	OTTHUMG00000031201.4	HSPA1A	HGNC:5232
ENSG00000183032.12	139.186	0.911902	0.202744	6.02582e-07	9.268e-06	OTTHUMG00000140250.3	SLC25A21	HGNC:14411
ENSG00000099625.13	266.721	-0.84208	0.186399	6.09329e-07	9.35601e-06	OTTHUMG00000180141.7	CBARP	HGNC:28617
ENSG00000167747.14	5722.65	-0.60368	0.131466	6.1901e-07	9.47282e-06	OTTHUMG00000182875.4	C19orf48	HGNC:29667
ENSG00000177359.20	85.0218	-0.980013	0.21918	6.20988e-07	9.49163e-06	OTTHUMG00000165051.7	AC024940.2
ENSG00000204272.13	1063.29	-0.610231	0.132248	6.21486e-07	9.49163e-06	OTTHUMG00000021676.4	NBDY	HGNC:50713
ENSG00000257135.7	97.3639	-1.11475	0.251927	6.43716e-07	9.79349e-06	OTTHUMG00000170230.3	ODC1-DT	HGNC:54070
ENSG00000129514.7	201.786	0.756084	0.166894	6.52222e-07	9.9064e-06	OTTHUMG00000140253.4	FOXA1	HGNC:5021
ENSG00000131435.13	304.457	-0.696467	0.152708	6.64908e-07	1.0074e-05	OTTHUMG00000059645.8	PDLIM4	HGNC:16501
ENSG00000272886.6	788.127	-0.736551	0.162808	6.75473e-07	1.02256e-05	OTTHUMG00000158193.8	DCP1A	HGNC:18714
ENSG00000124383.9	2426.61	0.604597	0.131352	6.90408e-07	1.0443e-05	OTTHUMG00000129715.7	MPHOSPH10	HGNC:7213
ENSG00000113657.13	195.408	-0.668341	0.146857	7.14029e-07	1.07469e-05	OTTHUMG00000163437.4	DPYSL3	HGNC:3015
ENSG00000148357.16	32.9774	-1.88663	0.434485	7.19316e-07	1.08176e-05	OTTHUMG00000140096.5	HMCN2	HGNC:21293
ENSG00000203896.10	214.069	-0.8166	0.18172	7.21797e-07	1.0846e-05	OTTHUMG00000032999.6	LIME1	HGNC:26016
ENSG00000107020.10	157.724	-0.75559	0.167512	7.22446e-07	1.08468e-05	OTTHUMG00000019501.3	PLGRKT	HGNC:23633
ENSG00000160813.7	471.902	-0.736749	0.164062	7.24871e-07	1.08743e-05	OTTHUMG00000159540.3	PPP1R35	HGNC:28320
ENSG00000003400.15	167.756	0.707839	0.155979	7.29241e-07	1.09299e-05	OTTHUMG00000132818.5	CASP10	HGNC:1500
ENSG00000175093.5	284.418	-0.604033	0.131642	7.34121e-07	1.0977e-05	OTTHUMG00000160223.2	SPSB4	HGNC:30630
ENSG00000102871.16	164.156	-0.765484	0.16981	7.48145e-07	1.11593e-05	OTTHUMG00000137519.4	TRADD	HGNC:12030
ENSG00000168038.11	77.0508	-0.966683	0.217994	7.64552e-07	1.13711e-05	OTTHUMG00000156210.4	ULK4	HGNC:15784
ENSG00000280164.1	41.9401	-1.3844	0.317703	7.64838e-07	1.13711e-05	OTTHUMG00000189369.1	CU638689.5
ENSG00000057294.14	453.33	0.589452	0.128738	7.8088e-07	1.15814e-05	OTTHUMG00000169500.3	PKP2	HGNC:9024
ENSG00000117228.10	17.4277	2.42027	0.555264	7.86618e-07	1.1657e-05	OTTHUMG00000010614.4	GBP1	HGNC:4182
ENSG00000198868.3	16.6445	-2.82733	0.632418	7.95801e-07	1.17835e-05	OTTHUMG00000163074.1	MTND4LP30	HGNC:42264
ENSG00000213760.10	72.1386	-1.10143	0.250574	8.0727e-07	1.19147e-05	OTTHUMG00000166618.1	ATP6V1G2	HGNC:862
ENSG00000213430.6	17.8806	-2.27434	0.517554	8.16664e-07	1.20436e-05	OTTHUMG00000161914.1	HSPD1P1	HGNC:35133
ENSG00000230869.1	104.873	-0.891034	0.200639	8.28125e-07	1.2193e-05	OTTHUMG00000018083.1	AGAP10P	HGNC:23659
ENSG00000059769.20	294.323	0.623711	0.137662	8.9112e-07	1.30784e-05	OTTHUMG00000020491.7	DNAJC25	HGNC:34187
ENSG00000107719.9	1387.99	-0.68784	0.152841	8.94417e-07	1.31057e-05	OTTHUMG00000018411.3	PALD1	HGNC:23530
ENSG00000131188.12	369.558	-0.744487	0.16668	9.08627e-07	1.32607e-05	OTTHUMG00000130861.5	PRR7	HGNC:28130
ENSG00000119943.13	62.7838	-1.22339	0.281218	9.24794e-07	1.34644e-05	OTTHUMG00000018877.4	PYROXD2	HGNC:23517
ENSG00000110841.14	805.148	-0.622022	0.137765	9.26215e-07	1.34744e-05	OTTHUMG00000169207.3	PPFIBP1	HGNC:9249
ENSG00000147676.14	57.6977	1.58802	0.362957	9.4251e-07	1.36462e-05	OTTHUMG00000164973.5	MAL2	HGNC:13634
ENSG00000165113.13	246.785	0.671952	0.149534	9.54803e-07	1.37914e-05	OTTHUMG00000020106.4	GKAP1	HGNC:17496
ENSG00000148908.15	929.704	-0.762374	0.171278	9.57845e-07	1.38135e-05	OTTHUMG00000019150.2	RGS10	HGNC:9992
ENSG00000197363.9	209.56	-0.654323	0.14577	9.64749e-07	1.39021e-05	OTTHUMG00000165199.2	ZNF517	HGNC:27984
ENSG00000185352.8	162.127	0.859226	0.194752	9.68761e-07	1.39489e-05	OTTHUMG00000017232.3	HS6ST3	HGNC:19134
ENSG00000102265.12	1417.78	-0.713329	0.159832	9.721e-07	1.3986e-05	OTTHUMG00000021447.3	TIMP1	HGNC:11820
ENSG00000064225.12	195.465	-0.677637	0.151481	9.76295e-07	1.40353e-05	OTTHUMG00000159047.6	ST3GAL6	HGNC:18080
ENSG00000179388.9	31.8265	2.42551	0.569802	9.94519e-07	1.42524e-05	OTTHUMG00000097825.3	EGR3	HGNC:3240
ENSG00000198624.13	289.135	0.677014	0.151039	1.01086e-06	1.44412e-05	OTTHUMG00000130127.3	CCDC69	HGNC:24487
ENSG00000105372.8	10357.5	-0.745533	0.168022	1.01705e-06	1.45184e-05	OTTHUMG00000182676.6	RPS19	HGNC:10402
ENSG00000159256.13	854.369	0.618041	0.137327	1.0294e-06	1.46336e-05	OTTHUMG00000086620.5	MORC3	HGNC:23572
ENSG00000261342.1	32.7269	1.65775	0.385252	1.02993e-06	1.46336e-05	OTTHUMG00000175711.2	AC006538.1
ENSG00000165521.15	352.422	0.950536	0.217618	1.03683e-06	1.47202e-05	OTTHUMG00000170811.3	EML5	HGNC:18197
ENSG00000214776.12	127.819	-0.817102	0.185764	1.04241e-06	1.4788e-05	OTTHUMG00000192215.4	AC092821.2
ENSG00000187848.15	68.247	-1.24394	0.28674	1.06132e-06	1.50097e-05	OTTHUMG00000168018.5	P2RX2	HGNC:15459
ENSG00000243199.1	51.3248	-1.19515	0.276685	1.09122e-06	1.5373e-05	OTTHUMG00000157492.1	AC115223.1
ENSG00000198832.10	626.103	-0.655885	0.146782	1.0931e-06	1.53854e-05	OTTHUMG00000151207.1	SELENOM	HGNC:30397
ENSG00000250479.8	623.768	-0.879413	0.200982	1.11416e-06	1.56358e-05	OTTHUMG00000150736.2	CHCHD10	HGNC:15559
ENSG00000213722.9	366.459	-0.742962	0.16768	1.14761e-06	1.60559e-05	OTTHUMG00000031212.7	DDAH2	HGNC:2716
ENSG00000197766.8	202.362	-0.918596	0.210991	1.16563e-06	1.62707e-05	OTTHUMG00000181840.6	CFD	HGNC:2771
ENSG00000152076.18	440.616	-0.621639	0.1389	1.16861e-06	1.62899e-05	OTTHUMG00000131629.4	CCDC74B	HGNC:25267
ENSG00000263146.2	24.5166	-1.86866	0.437388	1.16878e-06	1.62899e-05	OTTHUMG00000178053.2	LINC01896	HGNC:52715
ENSG00000149932.17	843.228	-0.639928	0.143345	1.17345e-06	1.63424e-05	OTTHUMG00000177105.9	TMEM219	HGNC:25201
ENSG00000044090.9	1462.95	-0.676075	0.151659	1.17837e-06	1.63859e-05	OTTHUMG00000014718.2	CUL7	HGNC:21024
ENSG00000100292.17	719.508	-0.595297	0.132805	1.20718e-06	1.67483e-05	OTTHUMG00000150960.4	HMOX1	HGNC:5013
ENSG00000185522.9	83.0132	-1.07389	0.248824	1.21446e-06	1.68365e-05	OTTHUMG00000132005.5	LMNTD2	HGNC:28561
ENSG00000001561.7	532.351	0.783463	0.178611	1.24204e-06	1.71848e-05	OTTHUMG00000014779.3	ENPP4	HGNC:3359
ENSG00000164713.10	645.866	-0.596356	0.133186	1.2424e-06	1.71848e-05	OTTHUMG00000154275.5	BRI3	HGNC:1109
ENSG00000179403.12	605.45	-0.677331	0.152766	1.24754e-06	1.72428e-05	OTTHUMG00000002975.6	VWA1	HGNC:30910
ENSG00000147813.16	511.346	-0.588483	0.131402	1.26961e-06	1.75081e-05	OTTHUMG00000156942.6	NAPRT	HGNC:30450
ENSG00000165698.16	307.376	-0.605634	0.135643	1.29436e-06	1.78226e-05	OTTHUMG00000020847.2	SPACA9	HGNC:1367
ENSG00000067842.17	55.4261	1.23388	0.288897	1.30362e-06	1.79365e-05	OTTHUMG00000024202.5	ATP2B3	HGNC:816
ENSG00000186019.11	55.3272	1.3579	0.319607	1.31462e-06	1.80607e-05	OTTHUMG00000182335.2	AC021092.1
ENSG00000133466.14	662.715	-0.58808	0.13174	1.32791e-06	1.8205e-05	OTTHUMG00000150538.2	C1QTNF6	HGNC:14343
ENSG00000136367.14	293.891	0.62382	0.140543	1.39587e-06	1.90338e-05	OTTHUMG00000156894.7	ZFHX2	HGNC:20152
ENSG00000288271.1	426.716	-0.730303	0.166934	1.43337e-06	1.95161e-05	OTTHUMG00000195918.1	AL136981.4
ENSG00000186897.5	310.518	-0.612751	0.138167	1.437e-06	1.95509e-05	OTTHUMG00000169515.3	C1QL4	HGNC:31416
ENSG00000126522.17	517.964	-0.603484	0.136476	1.47755e-06	2.00468e-05	OTTHUMG00000022876.13	ASL	HGNC:746
ENSG00000275074.2	164.869	-0.869298	0.201577	1.48042e-06	2.00669e-05	OTTHUMG00000163774.6	NUDT18	HGNC:26194
ENSG00000160179.18	134.494	0.804699	0.185463	1.51705e-06	2.05026e-05	OTTHUMG00000086791.4	ABCG1	HGNC:73
ENSG00000228109.1	72.2833	-1.17537	0.276631	1.5392e-06	2.07713e-05	OTTHUMG00000155519.1	MELTF-AS1	HGNC:40373
ENSG00000105193.9	7866.3	-0.703151	0.161121	1.55322e-06	2.09141e-05	OTTHUMG00000182972.3	RPS16	HGNC:10396
ENSG00000130822.15	45.1217	-1.26595	0.299056	1.5531e-06	2.09141e-05	OTTHUMG00000024216.7	PNCK	HGNC:13415
ENSG00000178935.5	186.891	0.711612	0.163344	1.61613e-06	2.16337e-05	OTTHUMG00000183478.1	ZNF552	HGNC:26135
ENSG00000088280.19	505.348	-0.627551	0.142724	1.62983e-06	2.1801e-05	OTTHUMG00000003234.8	ASAP3	HGNC:14987
ENSG00000176788.9	1058.36	0.775952	0.179163	1.66058e-06	2.21637e-05	OTTHUMG00000131061.8	BASP1	HGNC:957
ENSG00000134146.12	184.11	-0.687903	0.158336	1.67461e-06	2.23347e-05	OTTHUMG00000129759.7	DPH6	HGNC:30543
ENSG00000275740.1	242.887	1.93746	0.469246	1.68719e-06	2.2486e-05	OTTHUMG00000188625.1	AC091959.3
ENSG00000243547.1	16.7031	-2.49406	0.581946	1.70967e-06	2.27524e-05	OTTHUMG00000159028.1	HNRNPKP4	HGNC:42377
ENSG00000277203.1	345.608	-0.712314	0.16401	1.73043e-06	2.30119e-05	OTTHUMG00000013500.3	F8A1	HGNC:3547
ENSG00000139220.16	67.7282	0.964626	0.226657	1.7551e-06	2.32892e-05	OTTHUMG00000170181.5	PPFIA2	HGNC:9246
ENSG00000074370.18	306.182	-0.775762	0.180029	1.75882e-06	2.33216e-05	OTTHUMG00000177674.3	ATP2A3	HGNC:813
ENSG00000258315.5	757.381	-0.746247	0.172623	1.7698e-06	2.34162e-05	OTTHUMG00000170147.2	C17orf49	HGNC:28737
ENSG00000059804.16	389.214	-0.757065	0.175936	1.86313e-06	2.45977e-05	OTTHUMG00000133685.4	SLC2A3	HGNC:11007
ENSG00000179899.8	304.226	-0.69213	0.159953	1.90032e-06	2.50706e-05	OTTHUMG00000170978.1	PHC1P1	HGNC:34502
ENSG00000111432.4	250.114	0.766751	0.178831	1.92364e-06	2.53051e-05	OTTHUMG00000168380.3	FZD10	HGNC:4039
ENSG00000165474.8	74.9173	1.06955	0.254895	1.95908e-06	2.57342e-05	OTTHUMG00000016513.5	GJB2	HGNC:4284
ENSG00000213860.4	327.747	0.73855	0.17177	1.96164e-06	2.57493e-05	OTTHUMG00000152536.1	RPL21P75	HGNC:36460
ENSG00000126562.17	158.13	1.01698	0.241492	1.97784e-06	2.59433e-05	OTTHUMG00000180650.3	WNK4	HGNC:14544
ENSG00000062370.16	203.592	0.786817	0.184085	1.98942e-06	2.60766e-05	OTTHUMG00000182357.4	ZNF112	HGNC:12892
ENSG00000234664.1	799.329	-1.77626	0.433412	1.99107e-06	2.60795e-05	OTTHUMG00000172191.1	HMGN2P5	HGNC:33568
ENSG00000213963.6	48.8224	-1.24912	0.300528	2.00715e-06	2.62525e-05	OTTHUMG00000132531.15	AC019080.1
ENSG00000165156.15	1500.15	0.646717	0.148715	2.03413e-06	2.65863e-05	OTTHUMG00000165088.5	ZHX1	HGNC:12871
ENSG00000178057.15	1292.23	-0.812392	0.19067	2.05789e-06	2.68393e-05	OTTHUMG00000156773.3	NDUFAF3	HGNC:29918
ENSG00000232859.9	282.079	-0.798915	0.187306	2.07539e-06	2.70289e-05	OTTHUMG00000132829.10	LYRM9	HGNC:27314
ENSG00000227268.4	64.4766	-1.1633	0.28026	2.09904e-06	2.73175e-05	OTTHUMG00000186455.2	KLLN	HGNC:37212
ENSG00000189042.13	261.402	0.770605	0.180623	2.10206e-06	2.73372e-05	OTTHUMG00000180898.1	ZNF567	HGNC:28696
ENSG00000012171.20	222.204	-0.763062	0.178646	2.1163e-06	2.74833e-05	OTTHUMG00000156970.6	SEMA3B	HGNC:10724
ENSG00000142279.13	268.445	-0.696929	0.161838	2.1368e-06	2.77101e-05	OTTHUMG00000182099.5	WTIP	HGNC:20964
ENSG00000110011.13	629.919	-0.635208	0.146717	2.15437e-06	2.78919e-05	OTTHUMG00000167792.6	DNAJC4	HGNC:5271
ENSG00000197261.11	23.88	1.64768	0.399487	2.16631e-06	2.79935e-05	OTTHUMG00000014820.6	C6orf141	HGNC:21351
ENSG00000154342.6	188.562	-0.887963	0.20973	2.17381e-06	2.8032e-05	OTTHUMG00000037593.2	WNT3A	HGNC:15983
ENSG00000115828.17	286.038	0.61692	0.14158	2.18427e-06	2.8146e-05	OTTHUMG00000100963.5	QPCT	HGNC:9753
ENSG00000078549.14	401.987	-0.829624	0.195968	2.19533e-06	2.82486e-05	OTTHUMG00000023884.6	ADCYAP1R1	HGNC:242
ENSG00000169432.17	77.8105	1.15248	0.27694	2.26296e-06	2.90167e-05	OTTHUMG00000154044.8	SCN9A	HGNC:10597
ENSG00000131471.7	81.1034	1.04158	0.248871	2.26994e-06	2.90858e-05	OTTHUMG00000180656.3	AOC3	HGNC:550
ENSG00000159761.15	55.7698	-1.17202	0.282726	2.27248e-06	2.90979e-05	OTTHUMG00000150527.5	C16orf86	HGNC:33755
ENSG00000213648.10	125.479	1.03631	0.248681	2.2882e-06	2.92378e-05	OTTHUMG00000170468.2	SULT1A4	HGNC:30004
ENSG00000165714.11	167.8	-0.679065	0.158056	2.31198e-06	2.95177e-05	OTTHUMG00000168542.3	BORCS5	HGNC:17950
ENSG00000275591.5	75.3413	-1.5173	0.370365	2.3462e-06	2.98744e-05	OTTHUMG00000153652.5	XKR5	HGNC:20782
ENSG00000228526.7	301.449	-0.5909	0.13614	2.355e-06	2.99656e-05	OTTHUMG00000001762.6	MIR34AHG	HGNC:51913
ENSG00000132702.13	36.2395	-1.54872	0.377281	2.38797e-06	3.03428e-05	OTTHUMG00000033205.5	HAPLN2	HGNC:17410
ENSG00000074317.11	162.76	-0.817928	0.193761	2.40064e-06	3.04403e-05	OTTHUMG00000130661.3	SNCB	HGNC:11140
ENSG00000228203.7	85.1466	-0.914684	0.218089	2.40667e-06	3.04956e-05	OTTHUMG00000151701.4	RNF144A-AS1	HGNC:30963
ENSG00000231107.2	35.9609	1.66051	0.406123	2.46707e-06	3.111e-05	OTTHUMG00000020194.5	LINC01508	HGNC:51190
ENSG00000134709.12	1479.43	0.777427	0.183785	2.47911e-06	3.12187e-05	OTTHUMG00000008990.4	HOOK1	HGNC:19884
ENSG00000132967.9	1536.74	0.901768	0.215509	2.48249e-06	3.12397e-05	OTTHUMG00000155591.1	HMGB1P5	HGNC:4997
ENSG00000168071.22	304.458	-0.697814	0.163591	2.51036e-06	3.15687e-05	OTTHUMG00000045419.6	CCDC88B	HGNC:26757
ENSG00000134590.14	2290.61	-0.615049	0.142775	2.52738e-06	3.17608e-05	OTTHUMG00000022465.4	RTL8C	HGNC:2569
ENSG00000114942.14	8090.64	-0.590257	0.136625	2.58458e-06	3.24128e-05	OTTHUMG00000132891.4	EEF1B2	HGNC:3208
ENSG00000173846.13	110.452	-0.79161	0.188026	2.60654e-06	3.26657e-05	OTTHUMG00000008491.3	PLK3	HGNC:2154
ENSG00000144824.21	363.511	-0.725182	0.171759	2.63704e-06	3.30253e-05	OTTHUMG00000159282.4	PHLDB2	HGNC:29573
ENSG00000105519.17	68.2943	-1.03391	0.249361	2.64422e-06	3.30699e-05	OTTHUMG00000180619.7	CAPS	HGNC:1487
ENSG00000211450.10	1287.71	-0.678597	0.159003	2.6468e-06	3.30796e-05	OTTHUMG00000167202.7	SELENOH	HGNC:18251
ENSG00000261799.1	132.3	-1.04317	0.251918	2.68198e-06	3.34734e-05	OTTHUMG00000172900.1	AC007406.5
ENSG00000136490.9	713.275	-0.62857	0.146773	2.69122e-06	3.3543e-05	OTTHUMG00000178907.3	LIMD2	HGNC:28142
ENSG00000223756.6	57.0126	-1.40265	0.339794	2.69588e-06	3.35781e-05	OTTHUMG00000011705.3	TSSC2	HGNC:12384
ENSG00000272077.1	64.0084	1.10255	0.267315	2.72158e-06	3.38752e-05	OTTHUMG00000185519.1	AC124045.1
ENSG00000163376.11	247.98	0.776574	0.18474	2.77036e-06	3.44354e-05	OTTHUMG00000158779.2	KBTBD8	HGNC:30691
ENSG00000165312.6	395.085	-0.682726	0.161147	2.81686e-06	3.49658e-05	OTTHUMG00000017819.1	OTUD1	HGNC:27346
ENSG00000105755.8	123.34	-0.951055	0.228562	2.82135e-06	3.49978e-05	OTTHUMG00000182697.3	ETHE1	HGNC:23287
ENSG00000184992.13	1215.14	0.64822	0.151555	2.8343e-06	3.51346e-05	OTTHUMG00000168548.4	BRI3BP	HGNC:14251
ENSG00000229191.1	31.4828	-1.56104	0.382905	2.87101e-06	3.55413e-05	OTTHUMG00000035785.1	AL358473.1
ENSG00000183628.14	708.621	-0.58599	0.136671	2.88254e-06	3.56358e-05	OTTHUMG00000150162.5	DGCR6	HGNC:2846
ENSG00000283633.1	76.0216	-2.82488	0.666462	2.96661e-06	3.65515e-05	OTTHUMG00000141300.11	AP000547.3
ENSG00000170421.12	1650.08	0.604061	0.141338	3.04893e-06	3.74899e-05	OTTHUMG00000169881.7	KRT8	HGNC:6446
ENSG00000224729.6	41.9948	-1.44754	0.356573	3.06942e-06	3.76911e-05	OTTHUMG00000156674.3	PCOLCE-AS1	HGNC:40430
ENSG00000105750.15	51.8964	-1.62126	0.398122	3.11401e-06	3.81362e-05	OTTHUMG00000182747.6	ZNF85	HGNC:13160
ENSG00000214820.3	251.945	-0.63804	0.150743	3.26059e-06	3.97184e-05	OTTHUMG00000156454.1	MPRIPP1	HGNC:44594
ENSG00000128567.17	799.906	0.595095	0.139598	3.3429e-06	4.06667e-05	OTTHUMG00000154918.5	PODXL	HGNC:9171
ENSG00000281357.3	66.3506	-1.18127	0.293745	3.3744e-06	4.09681e-05	OTTHUMG00000189546.2	ARRDC3-AS1	HGNC:44145
ENSG00000197223.11	493.658	0.65069	0.154174	3.39573e-06	4.11724e-05	OTTHUMG00000129564.7	C1D	HGNC:29911
ENSG00000165588.17	72.2684	1.00759	0.246141	3.48114e-06	4.20405e-05	OTTHUMG00000152338.9	OTX2	HGNC:8522
ENSG00000055955.17	64.2985	-1.249	0.310817	3.5136e-06	4.23923e-05	OTTHUMG00000159023.3	ITIH4	HGNC:6169
ENSG00000269113.4	185.342	-0.696665	0.16648	3.51491e-06	4.23923e-05	OTTHUMG00000007960.4	TRABD2B	HGNC:44200
ENSG00000127952.17	437.695	-0.585533	0.137982	3.57473e-06	4.30287e-05	OTTHUMG00000130459.5	STYXL1	HGNC:18165
ENSG00000146013.11	38.2338	-1.66264	0.419082	3.59337e-06	4.32246e-05	OTTHUMG00000129200.3	GFRA3	HGNC:4245
ENSG00000138316.11	18.1513	-1.99406	0.496209	3.5982e-06	4.32541e-05	OTTHUMG00000018414.2	ADAMTS14	HGNC:14899
ENSG00000111981.5	246.138	0.944676	0.232053	3.65388e-06	4.38947e-05	OTTHUMG00000015810.3	ULBP1	HGNC:14893
ENSG00000185668.8	80.0709	-0.894308	0.218471	3.65731e-06	4.3907e-05	OTTHUMG00000000485.3	POU3F1	HGNC:9214
ENSG00000196839.13	465.537	-0.595972	0.139427	3.68358e-06	4.41891e-05	OTTHUMG00000033081.4	ADA	HGNC:186
ENSG00000177406.5	71.5611	-1.00515	0.24716	3.70651e-06	4.44101e-05	OTTHUMG00000168059.4	NINJ2-AS1	HGNC:40405
ENSG00000064195.7	46.3095	-1.23396	0.308248	3.74706e-06	4.48664e-05	OTTHUMG00000161892.2	DLX3	HGNC:2916
ENSG00000232653.8	124.648	-0.799865	0.194692	3.78018e-06	4.51743e-05	OTTHUMG00000175401.4	GOLGA8N	HGNC:44405
ENSG00000146674.15	33.9981	1.44919	0.36065	3.80759e-06	4.54721e-05	OTTHUMG00000023769.10	IGFBP3	HGNC:5472
ENSG00000263002.8	255.557	0.6743	0.16139	3.82451e-06	4.56443e-05	OTTHUMG00000182337.5	ZNF234	HGNC:13027
ENSG00000125510.18	109.814	-0.972461	0.239139	3.89753e-06	4.63644e-05	OTTHUMG00000033027.3	OPRL1	HGNC:8155
ENSG00000029534.20	348.404	0.65261	0.155939	3.96719e-06	4.71317e-05	OTTHUMG00000150281.8	ANK1	HGNC:492
ENSG00000135119.14	237.763	0.658286	0.157238	4.00175e-06	4.75114e-05	OTTHUMG00000150882.4	RNFT2	HGNC:25905
ENSG00000271980.1	11.6236	3.21117	0.786953	4.05305e-06	4.79957e-05	OTTHUMG00000185437.1	AC012640.6
ENSG00000115902.11	1115.72	0.717302	0.173579	4.05685e-06	4.80095e-05	OTTHUMG00000129537.4	SLC1A4	HGNC:10942
ENSG00000146966.13	264.93	-0.790535	0.192251	4.09564e-06	4.83921e-05	OTTHUMG00000157411.3	DENND2A	HGNC:22212
ENSG00000284820.1	192.23	-0.881195	0.216078	4.09467e-06	4.83921e-05	OTTHUMG00000192415.1	AC068946.2
ENSG00000134317.18	134.084	0.937614	0.231624	4.14893e-06	4.89724e-05	OTTHUMG00000151704.8	GRHL1	HGNC:17923
ENSG00000104154.7	210.314	0.62196	0.148549	4.28842e-06	5.0521e-05	OTTHUMG00000131439.4	SLC30A4	HGNC:11015
ENSG00000121743.4	263.307	0.642117	0.154027	4.30533e-06	5.06875e-05	OTTHUMG00000016510.4	GJA3	HGNC:4277
ENSG00000237950.3	54.6133	1.07237	0.266489	4.32809e-06	5.08245e-05	OTTHUMG00000007704.2	AL357079.1
ENSG00000071073.13	355.689	0.608884	0.145443	4.46422e-06	5.23221e-05	OTTHUMG00000130563.6	MGAT4A	HGNC:7047
ENSG00000230002.3	46.0696	-1.19996	0.302857	4.47063e-06	5.23637e-05	OTTHUMG00000152785.3	ALMS1-IT1	HGNC:41305
ENSG00000123609.11	87.7732	0.897908	0.220778	4.50094e-06	5.26175e-05	OTTHUMG00000131867.5	NMI	HGNC:7854
ENSG00000125384.7	35.686	1.31935	0.331752	4.78679e-06	5.56388e-05	OTTHUMG00000140300.3	PTGER2	HGNC:9594
ENSG00000197822.11	576.45	0.629822	0.151651	4.83655e-06	5.61457e-05	OTTHUMG00000099356.4	OCLN	HGNC:8104
ENSG00000156384.14	149.307	-0.822528	0.202424	4.85487e-06	5.63226e-05	OTTHUMG00000019000.1	SFR1	HGNC:29574
ENSG00000089639.11	376.269	-0.615606	0.148164	4.91758e-06	5.69778e-05	OTTHUMG00000182329.3	GMIP	HGNC:24852
ENSG00000139269.3	66.5649	1.56745	0.402034	5.14149e-06	5.92715e-05	OTTHUMG00000169995.3	INHBE	HGNC:24029
ENSG00000163347.6	35.1711	1.34466	0.342002	5.23516e-06	6.02373e-05	OTTHUMG00000156214.3	CLDN1	HGNC:2032
ENSG00000138772.13	111.308	0.832238	0.206307	5.26783e-06	6.0537e-05	OTTHUMG00000130198.10	ANXA3	HGNC:541
ENSG00000171425.10	397.151	-0.808311	0.200098	5.335e-06	6.12319e-05	OTTHUMG00000180869.5	ZNF581	HGNC:25017
ENSG00000157103.12	63.0234	-1.27074	0.322495	5.34867e-06	6.13502e-05	OTTHUMG00000044208.9	SLC6A1	HGNC:11042
ENSG00000261459.1	71.4641	-1.30433	0.336123	5.38158e-06	6.1689e-05	OTTHUMG00000176944.1	AC002310.4
ENSG00000124614.16	10784.2	-0.62701	0.152008	5.40242e-06	6.1889e-05	OTTHUMG00000014546.3	RPS10	HGNC:10383
ENSG00000261824.7	386.484	0.589543	0.14191	5.4102e-06	6.19394e-05	OTTHUMG00000175754.56	LINC00662	HGNC:27122
ENSG00000005961.19	232.397	-0.710692	0.174335	5.51691e-06	6.30425e-05	OTTHUMG00000177935.5	ITGA2B	HGNC:6138
ENSG00000160588.10	113.197	0.88004	0.219555	5.52923e-06	6.3118e-05	OTTHUMG00000166966.3	MPZL3	HGNC:27279
ENSG00000137959.16	36.6042	1.29218	0.32947	5.54577e-06	6.32536e-05	OTTHUMG00000009724.6	IFI44L	HGNC:17817
ENSG00000243477.5	447.867	-0.727713	0.179138	5.55369e-06	6.33045e-05	OTTHUMG00000156939.2	NAA80	HGNC:30252
ENSG00000130748.7	352.171	-0.822147	0.20454	5.56398e-06	6.33479e-05	OTTHUMG00000183441.2	TMEM160	HGNC:26042
ENSG00000235043.3	27.3972	-1.97631	0.503961	5.74066e-06	6.51917e-05	OTTHUMG00000160969.1	TECRP1	HGNC:44050
ENSG00000187634.12	1307.01	-0.662097	0.162135	5.81528e-06	6.58344e-05	OTTHUMG00000040719.11	SAMD11	HGNC:28706
ENSG00000174839.13	903.655	0.647981	0.158153	5.83314e-06	6.59958e-05	OTTHUMG00000158639.4	DENND6A	HGNC:26635
ENSG00000249695.6	10.6755	-2.5829	0.657276	5.87268e-06	6.6402e-05	OTTHUMG00000167977.2	AC026369.1
ENSG00000187583.11	32.2236	-1.73171	0.444309	5.98133e-06	6.75469e-05	OTTHUMG00000040756.5	PLEKHN1	HGNC:25284
ENSG00000170166.6	173.797	-0.650074	0.158972	6.09178e-06	6.86669e-05	OTTHUMG00000132515.5	HOXD4	HGNC:5138
ENSG00000111846.17	91.0203	0.832055	0.207174	6.09984e-06	6.87153e-05	OTTHUMG00000014244.6	GCNT2	HGNC:4204
ENSG00000132821.12	130.787	-0.902273	0.227218	6.14441e-06	6.91322e-05	OTTHUMG00000032430.4	VSTM2L	HGNC:16096
ENSG00000182771.19	496.017	-0.646091	0.15862	6.17965e-06	6.94432e-05	OTTHUMG00000018650.7	GRID1	HGNC:4575
ENSG00000072163.19	92.0744	-0.963524	0.244789	6.2539e-06	7.02343e-05	OTTHUMG00000131529.6	LIMS2	HGNC:16084
ENSG00000101247.18	253.16	0.602711	0.146558	6.34586e-06	7.11795e-05	OTTHUMG00000031909.8	NDUFAF5	HGNC:15899
ENSG00000260852.1	263.56	0.707663	0.175065	6.3672e-06	7.13314e-05	OTTHUMG00000176767.1	FBXL19-AS1	HGNC:27557
ENSG00000103260.9	511.226	-0.805206	0.200291	6.39875e-06	7.15532e-05	OTTHUMG00000047851.7	METRN	HGNC:14151
ENSG00000101670.12	11.5252	2.44049	0.624493	6.44144e-06	7.19426e-05	OTTHUMG00000179658.5	LIPG	HGNC:6623
ENSG00000250208.6	137.851	0.673113	0.165274	6.44129e-06	7.19426e-05	OTTHUMG00000168379.2	FZD10-AS1	HGNC:48632
ENSG00000165591.6	24.5901	1.4461	0.37341	6.49817e-06	7.24433e-05	OTTHUMG00000021684.1	FAAH2	HGNC:26440
ENSG00000286053.1	252.213	1.64534	0.431135	6.50567e-06	7.24827e-05	OTTHUMG00000132665.7	ASDURF	HGNC:53619
ENSG00000198931.11	3060.01	-0.642827	0.158075	6.59584e-06	7.33978e-05	OTTHUMG00000175454.6	APRT	HGNC:626
ENSG00000136014.12	195.841	0.727464	0.181008	6.64277e-06	7.37852e-05	OTTHUMG00000170281.3	USP44	HGNC:20064
ENSG00000139438.6	153.237	0.759682	0.189406	6.71017e-06	7.43531e-05	OTTHUMG00000169260.2	FAM222A	HGNC:25915
ENSG00000159685.11	541.048	-0.710443	0.176379	6.74176e-06	7.46579e-05	OTTHUMG00000159601.3	CHCHD6	HGNC:28184
ENSG00000128185.10	2560.4	-0.598399	0.14607	6.83826e-06	7.56807e-05	OTTHUMG00000150583.4	DGCR6L	HGNC:18551
ENSG00000129946.10	299.813	-0.620762	0.152042	6.85218e-06	7.57888e-05	OTTHUMG00000180545.10	SHC2	HGNC:29869
ENSG00000265590.10	1104.1	0.616704	0.151511	7.11238e-06	7.82672e-05	OTTHUMG00000064928.14	C21orf59-TCP10L
ENSG00000261150.3	185.683	0.767469	0.192623	7.17355e-06	7.88184e-05	OTTHUMG00000165206.4	EPPK1	HGNC:15577
ENSG00000143774.16	4929.17	-0.603163	0.148147	7.28854e-06	8.00338e-05	OTTHUMG00000039503.6	GUK1	HGNC:4693
ENSG00000117707.16	220.073	0.691311	0.172263	7.39475e-06	8.11512e-05	OTTHUMG00000036946.9	PROX1	HGNC:9459
ENSG00000287562.1	110.711	0.769039	0.19316	7.49194e-06	8.21192e-05	OTTHUMG00000193845.2	AL109615.4
ENSG00000272031.3	149.092	0.672017	0.166793	7.66346e-06	8.38986e-05	OTTHUMG00000013740.6	ANKRD34A	HGNC:27639
ENSG00000159917.17	165.925	0.629314	0.1554	7.69003e-06	8.41391e-05	OTTHUMG00000182353.4	ZNF235	HGNC:12866
ENSG00000286190.1	355.761	-0.770458	0.194335	7.76867e-06	8.47467e-05	OTTHUMG00000193519.1	AC055839.2
ENSG00000141524.15	291.857	-0.630284	0.156008	7.79409e-06	8.49723e-05	OTTHUMG00000177466.6	TMC6	HGNC:18021
ENSG00000128242.13	145.661	-0.933711	0.239471	7.85434e-06	8.55271e-05	OTTHUMG00000151200.4	GAL3ST1	HGNC:24240
ENSG00000171150.9	344.514	0.637261	0.158133	7.877e-06	8.57228e-05	OTTHUMG00000128852.4	SOCS5	HGNC:16852
ENSG00000184351.8	19.0591	2.19484	0.571605	7.97745e-06	8.66096e-05	OTTHUMG00000057768.3	KRTAP19-1	HGNC:18936
ENSG00000100344.11	146.07	0.682022	0.170664	8.06256e-06	8.73778e-05	OTTHUMG00000150555.3	PNPLA3	HGNC:18590
ENSG00000236499.2	22.9813	-1.49175	0.392694	8.09392e-06	8.75619e-05	OTTHUMG00000186112.1	LINC00896	HGNC:26519
ENSG00000178691.11	2391.84	0.587362	0.144783	8.1091e-06	8.76742e-05	OTTHUMG00000132813.3	SUZ12	HGNC:17101
ENSG00000213420.8	110.862	-0.74854	0.188753	8.15301e-06	8.79928e-05	OTTHUMG00000154894.5	GPC2	HGNC:4450
ENSG00000134256.12	52.9412	1.24695	0.325142	8.21286e-06	8.85864e-05	OTTHUMG00000012029.1	CD101	HGNC:5949
ENSG00000184908.17	59.1237	-1.14021	0.297834	8.27081e-06	8.91588e-05	OTTHUMG00000009530.2	CLCNKB	HGNC:2027
ENSG00000119632.4	80.2524	-0.887283	0.227329	8.32563e-06	8.95414e-05	OTTHUMG00000171313.2	IFI27L2	HGNC:19753
ENSG00000232573.1	109.391	-0.807265	0.205453	8.31752e-06	8.95414e-05	OTTHUMG00000028964.2	RPL3P4	HGNC:19805
ENSG00000111639.8	1561.45	-0.60613	0.150187	8.37666e-06	9.00343e-05	OTTHUMG00000168512.5	MRPL51	HGNC:14044
ENSG00000198467.15	678.524	-0.653618	0.163105	8.47334e-06	9.08014e-05	OTTHUMG00000019878.10	TPM2	HGNC:12011
ENSG00000169860.7	517.606	0.634246	0.158448	8.68964e-06	9.25814e-05	OTTHUMG00000159694.3	P2RY1	HGNC:8539
ENSG00000006611.16	353.86	-0.598186	0.146565	8.72729e-06	9.28202e-05	OTTHUMG00000166323.3	USH1C	HGNC:12597
ENSG00000095539.15	717.646	-0.706874	0.17876	8.71906e-06	9.28202e-05	OTTHUMG00000018922.3	SEMA4G	HGNC:10735
ENSG00000121871.4	184.208	0.591401	0.146365	8.82985e-06	9.38563e-05	OTTHUMG00000158072.5	SLITRK3	HGNC:23501
ENSG00000180440.4	58.7632	1.09806	0.286996	8.86261e-06	9.41498e-05	OTTHUMG00000016735.3	SERTM1	HGNC:33792
ENSG00000155545.19	857.798	0.671193	0.168824	8.99055e-06	9.54534e-05	OTTHUMG00000059589.12	MIER3	HGNC:26678
ENSG00000014914.21	109.861	-0.929843	0.240515	9.12014e-06	9.66608e-05	OTTHUMG00000012207.8	MTMR11	HGNC:24307
ENSG00000178980.15	614.096	-0.739102	0.187635	9.18583e-06	9.73006e-05	OTTHUMG00000183061.3	SELENOW	HGNC:10752
ENSG00000111254.8	140.677	-0.757185	0.193416	9.549e-06	0.000100739	OTTHUMG00000168226.5	AKAP3	HGNC:373
ENSG00000084073.9	1647.24	0.647497	0.162832	9.81704e-06	0.000103328	OTTHUMG00000005762.3	ZMPSTE24	HGNC:12877
ENSG00000151067.22	219.662	0.669587	0.169264	9.97397e-06	0.000104618	OTTHUMG00000150243.13	CACNA1C	HGNC:1390
ENSG00000112852.7	21.8222	-1.83974	0.486282	1.01683e-05	0.000106595	OTTHUMG00000129606.6	PCDHB2	HGNC:8687
ENSG00000111886.11	32.3462	1.33182	0.352095	1.03986e-05	0.00010876	OTTHUMG00000015198.4	GABRR2	HGNC:4091
ENSG00000162390.17	147.218	-0.705353	0.179758	1.05224e-05	0.000109803	OTTHUMG00000009891.2	ACOT11	HGNC:18156
ENSG00000103044.11	67.0475	0.870973	0.226173	1.07588e-05	0.000112047	OTTHUMG00000137562.4	HAS3	HGNC:4820
ENSG00000169750.9	3677.47	-0.754617	0.194929	1.07936e-05	0.000112313	OTTHUMG00000178455.3	RAC3	HGNC:9803
ENSG00000260260.1	137.479	-1.17615	0.313398	1.11754e-05	0.000115758	OTTHUMG00000177010.1	SNHG19	HGNC:49574
ENSG00000176428.6	157.317	-0.782069	0.202097	1.1316e-05	0.000117082	OTTHUMG00000157227.2	VPS37D	HGNC:18287
ENSG00000135636.14	124.9	-0.864498	0.225838	1.17292e-05	0.000120894	OTTHUMG00000129757.9	DYSF	HGNC:3097
ENSG00000230513.2	281.238	-0.673189	0.171762	1.17298e-05	0.000120894	OTTHUMG00000150877.2	THAP7-AS1	HGNC:41013
ENSG00000126950.8	61.6382	-1.19758	0.319028	1.19074e-05	0.0001223	OTTHUMG00000022016.2	TMEM35A	HGNC:25864
ENSG00000164604.12	71.3026	1.00086	0.265302	1.20001e-05	0.000123045	OTTHUMG00000156933.4	GPR85	HGNC:4536
ENSG00000105642.15	168.234	-0.688254	0.176309	1.20196e-05	0.000123176	OTTHUMG00000183482.9	KCNN1	HGNC:6290
ENSG00000175602.4	728.347	-0.761103	0.197909	1.24362e-05	0.000126946	OTTHUMG00000166722.2	CCDC85B	HGNC:24926
ENSG00000090013.11	516.928	-0.589821	0.149079	1.24888e-05	0.000127412	OTTHUMG00000182593.4	BLVRB	HGNC:1063
ENSG00000167526.13	33561.1	-0.593654	0.148767	1.28265e-05	0.000130275	OTTHUMG00000133770.8	RPL13	HGNC:10303
ENSG00000059915.17	97.8716	-0.830351	0.218669	1.32209e-05	0.000133909	OTTHUMG00000018954.5	PSD	HGNC:9507
ENSG00000267121.6	72.4291	-1.02784	0.275685	1.35629e-05	0.000137069	OTTHUMG00000180195.2	AC008105.3
ENSG00000172586.8	532.426	-0.869771	0.230013	1.37326e-05	0.000138631	OTTHUMG00000018475.2	CHCHD1	HGNC:23518
ENSG00000164221.13	801.026	0.642911	0.16515	1.38425e-05	0.000139663	OTTHUMG00000128894.4	CCDC112	HGNC:28599
ENSG00000110900.15	94.7042	-0.802706	0.211216	1.39865e-05	0.000140727	OTTHUMG00000168484.2	TSPAN11	HGNC:30795
ENSG00000257704.4	132.562	-1.00191	0.267495	1.40975e-05	0.000141634	OTTHUMG00000170128.3	INAFM1	HGNC:27406
ENSG00000241014.2	6.16995	-6.2073	2.63155	1.43048e-05	0.000143378	OTTHUMG00000004046.4	AC114490.1
ENSG00000169403.12	26.3346	1.58632	0.431939	1.43246e-05	0.000143497	OTTHUMG00000003953.2	PTAFR	HGNC:9582
ENSG00000205795.4	55.9616	-1.02495	0.275083	1.4413e-05	0.000144225	OTTHUMG00000151703.1	CYS1	HGNC:18525
ENSG00000278175.4	384.593	0.599184	0.153113	1.45916e-05	0.000145852	OTTHUMG00000189744.7	GLIDR	HGNC:48823
ENSG00000108187.16	247.87	-0.713973	0.186698	1.46367e-05	0.000146223	OTTHUMG00000073949.6	PBLD	HGNC:23301
ENSG00000166689.16	388.687	0.59512	0.152406	1.48786e-05	0.000148258	OTTHUMG00000165954.5	PLEKHA7	HGNC:27049
ENSG00000145390.11	986.764	0.633966	0.162714	1.49543e-05	0.000148907	OTTHUMG00000161331.3	USP53	HGNC:29255
ENSG00000111371.16	7408.81	0.626648	0.161505	1.55401e-05	0.000154153	OTTHUMG00000169470.4	SLC38A1	HGNC:13447
ENSG00000273142.1	620.721	-0.587627	0.15027	1.55521e-05	0.000154188	OTTHUMG00000186265.1	LINC02604	HGNC:53972
ENSG00000103490.14	11.034	2.51024	0.676338	1.60186e-05	0.000158297	OTTHUMG00000176753.33	PYCARD	HGNC:16608
ENSG00000076344.16	18.4363	-1.7633	0.486986	1.6048e-05	0.000158502	OTTHUMG00000064893.7	RGS11	HGNC:9993
ENSG00000279800.2	31.5112	1.49456	0.413533	1.60739e-05	0.000158672	OTTHUMG00000191386.1	BCLAF1P2	HGNC:51807
ENSG00000144893.12	331.366	0.59306	0.152604	1.64019e-05	0.00016141	OTTHUMG00000159844.4	MED12L	HGNC:16050
ENSG00000180998.12	242.005	-0.609384	0.157786	1.64042e-05	0.00016141	OTTHUMG00000171104.3	GPR137C	HGNC:25445
ENSG00000284981.1	415.437	-0.586278	0.15073	1.65021e-05	0.000162111	OTTHUMG00000192388.1	UPK3BL2	HGNC:53444
ENSG00000148814.18	139.794	-0.673713	0.176204	1.69299e-05	0.000165778	OTTHUMG00000019284.5	LRRC27	HGNC:29346
ENSG00000168918.14	124.802	-0.719293	0.189595	1.69631e-05	0.000166014	OTTHUMG00000133688.7	INPP5D	HGNC:6079
ENSG00000168811.7	61.5386	0.959144	0.259063	1.69953e-05	0.000166152	OTTHUMG00000158942.3	IL12A	HGNC:5969
ENSG00000255441.1	22.172	-1.64774	0.455224	1.72723e-05	0.000168409	OTTHUMG00000165523.1	AC008750.2
ENSG00000136883.14	33.2802	-1.34685	0.374121	1.76584e-05	0.000171552	OTTHUMG00000020533.5	KIF12	HGNC:21495
ENSG00000242600.8	60.9315	-1.04173	0.283797	1.76594e-05	0.000171552	OTTHUMG00000018595.3	MBL1P	HGNC:6921
ENSG00000256594.8	57.3245	-1.09929	0.302104	1.77085e-05	0.000171747	OTTHUMG00000186391.4	AC010186.2
ENSG00000110344.9	2437.41	0.609806	0.158305	1.78621e-05	0.00017296	OTTHUMG00000168100.1	UBE4A	HGNC:12499
ENSG00000273329.1	146.327	0.667533	0.175264	1.81152e-05	0.00017504	OTTHUMG00000186330.1	AC078846.1
ENSG00000232112.3	1418.26	-0.716493	0.189801	1.82047e-05	0.000175564	OTTHUMG00000156588.3	TMA7	HGNC:26932
ENSG00000157429.16	139.46	-0.630227	0.164486	1.82446e-05	0.000175674	OTTHUMG00000137593.10	ZNF19	HGNC:12981
ENSG00000164089.9	37.6785	1.27088	0.351972	1.84932e-05	0.000177659	OTTHUMG00000161036.3	ETNPPL	HGNC:14404
ENSG00000243302.3	376.629	-0.642985	0.168913	1.8691e-05	0.000179089	OTTHUMG00000158227.1	AC018638.4
ENSG00000227540.1	96.208	-0.946555	0.258062	1.93172e-05	0.000184894	OTTHUMG00000018458.1	AC016394.2
ENSG00000220008.3	84.375	-0.943558	0.257692	1.96883e-05	0.000188053	OTTHUMG00000180418.2	LINGO3	HGNC:21206
ENSG00000187595.16	169.506	-0.665857	0.175274	2.00419e-05	0.000191231	OTTHUMG00000132073.7	ZNF385C	HGNC:33722
ENSG00000062038.14	85.2477	-0.841508	0.227579	2.01811e-05	0.000192257	OTTHUMG00000137560.8	CDH3	HGNC:1762
ENSG00000256546.2	200.321	0.628784	0.164952	2.0234e-05	0.000192661	OTTHUMG00000168952.3	AC156455.1
ENSG00000171827.10	148.266	0.665344	0.175762	2.06528e-05	0.000196342	OTTHUMG00000048176.4	ZNF570	HGNC:26416
ENSG00000187867.10	199.748	0.762579	0.204505	2.08085e-05	0.000197513	OTTHUMG00000181991.5	PALM3	HGNC:33274
ENSG00000136274.9	250.146	-0.725692	0.193934	2.1038e-05	0.000199071	OTTHUMG00000159170.3	NACAD	HGNC:22196
ENSG00000212802.4	65.7124	-0.885218	0.241898	2.12426e-05	0.000200592	OTTHUMG00000014268.2	RPL15P3	HGNC:21538
ENSG00000198551.10	223.831	-0.60306	0.159014	2.19655e-05	0.00020699	OTTHUMG00000182035.3	ZNF627	HGNC:30570
ENSG00000177640.16	148.458	-0.641813	0.170402	2.26243e-05	0.000212733	OTTHUMG00000019127.9	CASC2	HGNC:22933
ENSG00000254615.3	141.47	0.660219	0.175149	2.26331e-05	0.000212733	OTTHUMG00000156320.8	AC027031.2
ENSG00000134864.10	125.299	-0.77774	0.210664	2.2648e-05	0.000212763	OTTHUMG00000017291.5	GGACT	HGNC:25100
ENSG00000173442.13	545.991	-0.751935	0.202907	2.28385e-05	0.000214223	OTTHUMG00000166520.5	EHBP1L1	HGNC:30682
ENSG00000107872.12	395.53	-0.63791	0.169143	2.29675e-05	0.000215322	OTTHUMG00000018957.7	FBXL15	HGNC:28155
ENSG00000235174.1	31.411	-1.5038	0.427854	2.31936e-05	0.000217107	OTTHUMG00000015023.2	RPL39P3	HGNC:21383
ENSG00000267469.1	10.0882	-3.94874	1.13254	2.33363e-05	0.000218332	OTTHUMG00000180706.2	AC005944.1
ENSG00000134825.16	428.608	-0.624412	0.165753	2.35743e-05	0.000220107	OTTHUMG00000168172.2	TMEM258	HGNC:1164
ENSG00000070886.12	220.72	-0.649955	0.173095	2.39052e-05	0.000223083	OTTHUMG00000002892.2	EPHA8	HGNC:3391
ENSG00000128298.17	33.0766	-1.49066	0.419327	2.39469e-05	0.000223248	OTTHUMG00000151197.5	BAIAP2L2	HGNC:26203
ENSG00000179611.3	27.1959	-1.36226	0.384473	2.42851e-05	0.000225935	OTTHUMG00000016825.2	DGKZP1	HGNC:39263
ENSG00000162745.10	47.8742	1.08138	0.302661	2.47727e-05	0.000229844	OTTHUMG00000024047.2	OLFML2B	HGNC:24558
ENSG00000237094.12	146.557	-0.836765	0.230572	2.47933e-05	0.000229844	OTTHUMG00000002857.7	AL732372.2
ENSG00000262049.1	498.918	-0.655557	0.174766	2.47901e-05	0.000229844	OTTHUMG00000178170.1	AC139530.1
ENSG00000120049.19	27.7125	-1.48625	0.423256	2.5279e-05	0.000233636	OTTHUMG00000018937.4	KCNIP2	HGNC:15522
ENSG00000198221.10	60.8146	-1.24042	0.351437	2.5634e-05	0.000236558	OTTHUMG00000016029.5	AFDN-DT	HGNC:21236
ENSG00000103528.17	104.138	-0.738319	0.201324	2.60167e-05	0.000239726	OTTHUMG00000131461.6	SYT17	HGNC:24119
ENSG00000267740.5	208.227	-1.11583	0.315543	2.60959e-05	0.000240334	OTTHUMG00000180627.2	AC024592.3
ENSG00000257242.8	20.2078	1.56867	0.444389	2.61903e-05	0.000240962	OTTHUMG00000170091.5	LINC01619	HGNC:27409
ENSG00000130234.11	38.3889	1.22837	0.348876	2.69957e-05	0.000247251	OTTHUMG00000193402.2	ACE2	HGNC:13557
ENSG00000104450.12	283.697	0.749847	0.205018	2.7048e-05	0.000247606	OTTHUMG00000164706.3	SPAG1	HGNC:11212
ENSG00000109819.9	49.5399	1.16204	0.329758	2.70944e-05	0.000247906	OTTHUMG00000097747.3	PPARGC1A	HGNC:9237
ENSG00000127870.17	865.906	0.665053	0.179646	2.75923e-05	0.000251705	OTTHUMG00000016614.5	RNF6	HGNC:10069
ENSG00000107954.10	77.0625	-0.869666	0.241297	2.78271e-05	0.000253308	OTTHUMG00000018995.2	NEURL1	HGNC:7761
ENSG00000198744.5	40978.2	-0.709096	0.193439	2.78373e-05	0.000253308	OTTHUMG00000002337.2	MTCO3P12	HGNC:52042
ENSG00000179304.16	726.211	-0.811031	0.224444	2.86375e-05	0.000260201	OTTHUMG00000188219.4	FAM156B	HGNC:31962
ENSG00000164199.18	471.121	0.585809	0.156569	2.89818e-05	0.000263068	OTTHUMG00000162668.13	ADGRV1	HGNC:17416
ENSG00000154914.17	171.375	-0.611469	0.164599	2.91767e-05	0.000264171	OTTHUMG00000177942.10	USP43	HGNC:20072
ENSG00000215097.3	21.5188	-1.76522	0.51294	2.91901e-05	0.000264171	OTTHUMG00000018099.2	AL731733.1
ENSG00000173546.7	805.283	-0.589003	0.157571	2.94886e-05	0.000266345	OTTHUMG00000142836.1	CSPG4	HGNC:2466
ENSG00000128965.13	613.734	0.586085	0.157144	3.02795e-05	0.000272655	OTTHUMG00000130208.11	CHAC1	HGNC:28680
ENSG00000261377.5	106.817	0.818624	0.227879	3.05303e-05	0.000274262	OTTHUMG00000176344.3	PDCD6IPP2	HGNC:49873
ENSG00000242299.1	18.3936	-1.89202	0.554094	3.11993e-05	0.000279311	OTTHUMG00000157333.1	AC073861.1
ENSG00000116329.11	114.212	-0.72929	0.200965	3.12529e-05	0.000279654	OTTHUMG00000003646.3	OPRD1	HGNC:8153
ENSG00000223839.8	186.864	-0.785351	0.21825	3.24456e-05	0.000289193	OTTHUMG00000058623.3	FAM95B1	HGNC:32318
ENSG00000107831.13	13.8938	-1.998	0.583102	3.27829e-05	0.000291773	OTTHUMG00000018940.3	FGF8	HGNC:3686
ENSG00000154102.11	124.838	-0.787408	0.219954	3.27791e-05	0.000291773	OTTHUMG00000183875.2	C16orf74	HGNC:23362
ENSG00000261512.2	77.5366	-1.04835	0.299958	3.28334e-05	0.000291937	OTTHUMG00000175597.2	AC092368.3
ENSG00000213654.10	45.8289	-1.16435	0.336631	3.43137e-05	0.000303916	OTTHUMG00000031244.4	GPSM3	HGNC:13945
ENSG00000178878.12	172.96	-0.666455	0.184036	3.47924e-05	0.000307409	OTTHUMG00000153561.2	APOLD1	HGNC:25268
ENSG00000204252.14	190.582	-0.646907	0.17756	3.48258e-05	0.000307409	OTTHUMG00000031211.4	HLA-DOA	HGNC:4936
ENSG00000005102.14	29.6475	1.21639	0.352443	3.49462e-05	0.000308323	OTTHUMG00000170513.3	MEOX1	HGNC:7013
ENSG00000187837.3	135.115	0.784085	0.218943	3.50797e-05	0.000309202	OTTHUMG00000016140.2	H1-2	HGNC:4716
ENSG00000264548.1	32.4885	-1.33841	0.391922	3.51804e-05	0.00030994	OTTHUMG00000178600.1	AC132872.2
ENSG00000279968.2	108.383	-0.703479	0.194625	3.5884e-05	0.000315531	OTTHUMG00000189248.2	GVQW2	HGNC:51715
ENSG00000176386.9	396.784	0.67864	0.187631	3.61035e-05	0.000317308	OTTHUMG00000020521.2	CDC26	HGNC:17839
ENSG00000183604.14	170.058	0.739016	0.20606	3.62597e-05	0.000318527	OTTHUMG00000166915.2	SMG1P5	HGNC:49862
ENSG00000101680.15	941.477	-0.724728	0.202089	3.66892e-05	0.00032127	OTTHUMG00000133478.5	LAMA1	HGNC:6481
ENSG00000105639.19	66.0847	-0.885434	0.252405	3.71449e-05	0.000324432	OTTHUMG00000165648.2	JAK3	HGNC:6193
ENSG00000226754.2	50.964	-1.14923	0.336595	3.75017e-05	0.000326923	OTTHUMG00000008941.5	AL606760.1
ENSG00000232024.2	639.069	0.666465	0.184463	3.78781e-05	0.000329576	OTTHUMG00000157150.1	LSM12P1	HGNC:32453
ENSG00000086506.3	87.2867	-0.859145	0.243716	3.84098e-05	0.000333408	OTTHUMG00000060727.2	HBQ1	HGNC:4833
ENSG00000112245.12	766.784	1.78603	0.53874	3.84336e-05	0.000333456	OTTHUMG00000014949.6	PTP4A1	HGNC:9634
ENSG00000139239.7	35.0601	-1.4485	0.426912	3.86419e-05	0.000334787	OTTHUMG00000157598.1	RPL14P1	HGNC:31384
ENSG00000204514.10	146.634	0.750591	0.210791	3.86722e-05	0.00033489	OTTHUMG00000183519.2	ZNF814	HGNC:33258
ENSG00000251357.4	28.3228	-1.62607	0.480317	3.8751e-05	0.000335414	OTTHUMG00000150787.3	AP000350.4
ENSG00000267397.1	16.5384	2.06496	0.605231	3.93841e-05	0.000339927	OTTHUMG00000176165.1	AC090229.1
ENSG00000119655.10	713.596	-0.648085	0.179637	3.97035e-05	0.000342523	OTTHUMG00000171212.2	NPC2	HGNC:14537
ENSG00000049089.15	189.304	-0.591629	0.162336	3.97947e-05	0.000342985	OTTHUMG00000005761.7	COL9A2	HGNC:2218
ENSG00000198576.4	58.6276	1.13119	0.331435	3.9793e-05	0.000342985	OTTHUMG00000134310.4	ARC	HGNC:648
ENSG00000258757.1	134.769	0.921229	0.264675	3.99144e-05	0.000343692	OTTHUMG00000171105.1	AL133453.1
ENSG00000172650.13	268.855	-0.597754	0.16447	4.141e-05	0.000354899	OTTHUMG00000018473.3	AGAP5	HGNC:23467
ENSG00000155085.15	145.788	0.642021	0.177716	4.18831e-05	0.000358616	OTTHUMG00000157658.8	AK9	HGNC:33814
ENSG00000125730.17	150.254	-0.749214	0.211779	4.2575e-05	0.000363859	OTTHUMG00000150335.7	C3	HGNC:1318
ENSG00000215105.4	65.6676	-0.940292	0.27298	4.32704e-05	0.00036894	OTTHUMG00000021869.1	TTC3P1	HGNC:23318
ENSG00000189367.15	325.911	-0.719513	0.202605	4.35367e-05	0.000371037	OTTHUMG00000166439.4	KIAA0408	HGNC:21636
ENSG00000111912.20	589.756	0.607223	0.167891	4.37734e-05	0.000372533	OTTHUMG00000015513.8	NCOA7	HGNC:21081
ENSG00000226953.8	13.8574	-5.22297	2.40516	4.38536e-05	0.000373042	OTTHUMG00000153495.6	NCKAP5-AS2	HGNC:54065
ENSG00000266642.2	31.8427	2.10905	0.639229	4.43031e-05	0.00037634	OTTHUMG00000179498.3	AC024267.7
ENSG00000185532.19	590.537	-0.647312	0.180617	4.4927e-05	0.000381285	OTTHUMG00000018248.15	PRKG1	HGNC:9414
ENSG00000166183.16	11.1912	-2.21844	0.664739	4.5208e-05	0.000383314	OTTHUMG00000170045.5	ASPG	HGNC:20123
ENSG00000174951.11	44.2735	1.6925	0.509441	4.52811e-05	0.000383577	OTTHUMG00000183325.3	FUT1	HGNC:4012
ENSG00000112379.9	531.435	0.616431	0.169509	4.57936e-05	0.000387021	OTTHUMG00000015670.5	ARFGEF3	HGNC:21213
ENSG00000261884.2	124.07	0.626369	0.173426	4.60136e-05	0.000388701	OTTHUMG00000177516.4	AC040162.1
ENSG00000121310.17	324.929	0.625854	0.174468	4.62773e-05	0.000390387	OTTHUMG00000008927.10	ECHDC2	HGNC:23408
ENSG00000183092.16	173.226	-0.792711	0.226724	4.69298e-05	0.000395344	OTTHUMG00000171589.3	BEGAIN	HGNC:24163
ENSG00000169136.11	603.812	0.686962	0.193524	4.70986e-05	0.000396583	OTTHUMG00000183065.5	ATF5	HGNC:790
ENSG00000176171.11	1971.55	-0.640174	0.17916	4.75868e-05	0.000400141	OTTHUMG00000019278.3	BNIP3	HGNC:1084
ENSG00000189409.14	88.0924	-0.786298	0.224855	4.7763e-05	0.000401253	OTTHUMG00000074713.7	MMP23B	HGNC:7171
ENSG00000174332.5	52.9374	-1.04439	0.308064	4.87889e-05	0.000408744	OTTHUMG00000008079.2	GLIS1	HGNC:29525
ENSG00000166343.10	55.6019	-1.00129	0.294283	4.88303e-05	0.000408903	OTTHUMG00000018464.6	MSS51	HGNC:21000
ENSG00000163075.13	44.1104	-1.09053	0.320642	4.88719e-05	0.000409064	OTTHUMG00000153310.2	CFAP221	HGNC:33720
ENSG00000166436.16	611.122	-0.608552	0.169749	4.92077e-05	0.00041131	OTTHUMG00000150481.6	TRIM66	HGNC:29005
ENSG00000089820.15	82.7782	-0.759036	0.218016	5.01432e-05	0.000417631	OTTHUMG00000024226.47	ARHGAP4	HGNC:674
ENSG00000213889.10	171.636	-0.669783	0.189116	5.01468e-05	0.000417631	OTTHUMG00000140397.7	PPM1N	HGNC:26845
ENSG00000148225.16	150.769	-0.918946	0.270997	5.05766e-05	0.000420827	OTTHUMG00000020525.6	WDR31	HGNC:21421
ENSG00000172456.17	128.557	-0.688863	0.195503	5.07806e-05	0.00042214	OTTHUMG00000008424.16	FGGY	HGNC:25610
ENSG00000188816.3	22.4981	-1.60557	0.48604	5.14839e-05	0.000426627	OTTHUMG00000019198.1	HMX2	HGNC:5018
ENSG00000258525.2	73.4005	-0.744368	0.213805	5.18022e-05	0.000428488	OTTHUMG00000170583.3	AL049830.3
ENSG00000172840.7	551.428	0.606663	0.169699	5.21625e-05	0.000431078	OTTHUMG00000137512.9	PDP2	HGNC:30263
ENSG00000115194.11	315.653	-0.610058	0.17101	5.25061e-05	0.000433525	OTTHUMG00000128409.5	SLC30A3	HGNC:11014
ENSG00000230873.9	39.96	1.24138	0.373118	5.30908e-05	0.00043776	OTTHUMG00000014304.5	STMND1	HGNC:44668
ENSG00000105327.17	283.529	-0.645584	0.182418	5.32868e-05	0.00043898	OTTHUMG00000183489.2	BBC3	HGNC:17868
ENSG00000062524.16	134.716	-0.587894	0.164099	5.3414e-05	0.000439539	OTTHUMG00000130339.3	LTK	HGNC:6721
ENSG00000273466.1	58.6671	1.26707	0.382426	5.34269e-05	0.000439539	OTTHUMG00000186314.1	AC012510.1
ENSG00000141505.12	72.1285	-0.841791	0.245996	5.34547e-05	0.00043957	OTTHUMG00000102159.7	ASGR1	HGNC:742
ENSG00000254815.6	151.682	-0.725045	0.207576	5.46441e-05	0.000448141	OTTHUMG00000165116.3	LMNTD2-AS1	HGNC:41204
ENSG00000061656.10	58.339	-1.11882	0.3347	5.51335e-05	0.000451749	OTTHUMG00000032352.6	SPAG4	HGNC:11214
ENSG00000175938.7	201.098	-0.636825	0.180606	5.58713e-05	0.000457179	OTTHUMG00000176768.50	ORAI3	HGNC:28185
ENSG00000177600.9	6878.91	-0.705618	0.202617	5.62129e-05	0.000459768	OTTHUMG00000133317.5	RPLP2	HGNC:10377
ENSG00000185220.12	124.666	0.623893	0.175804	5.62399e-05	0.000459783	OTTHUMG00000040424.2	PGBD2	HGNC:19399
ENSG00000253746.1	30.3883	1.27786	0.386662	5.62655e-05	0.000459786	OTTHUMG00000164278.1	AC091182.2
ENSG00000275325.4	36.7153	1.43093	0.439544	5.66883e-05	0.000462414	OTTHUMG00000188375.1	PDCD6IPP1	HGNC:49872
ENSG00000137760.14	804.511	0.643336	0.182621	5.72499e-05	0.000466788	OTTHUMG00000157008.3	ALKBH8	HGNC:25189
ENSG00000105227.15	136.73	-0.669821	0.190592	5.73162e-05	0.00046712	OTTHUMG00000182597.4	PRX	HGNC:13797
ENSG00000118307.19	18.6101	-1.54339	0.472732	5.76433e-05	0.000469366	OTTHUMG00000150195.8	CASC1	HGNC:29599
ENSG00000229119.3	25.3868	-1.72391	0.526104	5.87251e-05	0.000477324	OTTHUMG00000162895.1	AC026403.1
ENSG00000063127.16	47.4963	1.09101	0.326461	5.97742e-05	0.000484947	OTTHUMG00000183179.4	SLC6A16	HGNC:13622
ENSG00000228981.3	7.28901	-3.1639	0.949221	6.04466e-05	0.000489358	OTTHUMG00000157574.1	AC097658.2
ENSG00000103534.17	49.0794	0.845388	0.248443	6.08726e-05	0.000492152	OTTHUMG00000131458.5	TMC5	HGNC:22999
ENSG00000183580.10	36.7064	-1.14766	0.346347	6.14492e-05	0.000496375	OTTHUMG00000161798.2	FBXL7	HGNC:13604
ENSG00000188243.12	571.805	-0.608058	0.172112	6.16533e-05	0.000497583	OTTHUMG00000017089.4	COMMD6	HGNC:24015
ENSG00000206228.4	12.156	-3.09313	0.898065	6.24092e-05	0.000502574	OTTHUMG00000163344.1	HNRNPA1P4	HGNC:32234
ENSG00000023892.11	343.521	-0.751584	0.219016	6.24642e-05	0.000502796	OTTHUMG00000014563.3	DEF6	HGNC:2760
ENSG00000171680.22	435.177	-0.610973	0.174245	6.31772e-05	0.000507417	OTTHUMG00000000905.5	PLEKHG5	HGNC:29105
ENSG00000179588.9	253.098	-0.621374	0.176525	6.3219e-05	0.000507529	OTTHUMG00000173152.5	ZFPM1	HGNC:19762
ENSG00000182324.7	107.705	0.740709	0.215387	6.44183e-05	0.000516024	OTTHUMG00000183307.3	KCNJ14	HGNC:6260
ENSG00000232677.8	25.4057	-1.26971	0.390561	6.53091e-05	0.000522244	OTTHUMG00000048145.6	LINC00665	HGNC:44323
ENSG00000280441.3	372.792	0.706217	0.20455	6.56293e-05	0.000523888	OTTHUMG00000189419.3	FP236383.3
ENSG00000107859.10	48.8646	-1.03609	0.313744	6.57041e-05	0.000524256	OTTHUMG00000018952.2	PITX3	HGNC:9006
ENSG00000145592.14	13476.2	-0.620169	0.177394	6.65503e-05	0.000530312	OTTHUMG00000094774.6	RPL37	HGNC:10347
ENSG00000165092.13	31.8566	1.2374	0.378661	6.66735e-05	0.000531049	OTTHUMG00000020019.3	ALDH1A1	HGNC:402
ENSG00000205403.13	28.2278	1.65099	0.51148	6.67008e-05	0.000531049	OTTHUMG00000161109.6	CFI	HGNC:5394
ENSG00000147174.11	72.5893	0.91537	0.274182	6.69459e-05	0.000532536	OTTHUMG00000033327.1	GCNA	HGNC:15805
ENSG00000136205.17	632.668	-0.610448	0.17469	6.72826e-05	0.000534516	OTTHUMG00000074075.4	TNS3	HGNC:21616
ENSG00000138669.9	121.542	0.642039	0.184713	6.74456e-05	0.000535372	OTTHUMG00000130296.3	PRKG2	HGNC:9416
ENSG00000177679.16	242.618	-0.586611	0.166409	6.76359e-05	0.000536623	OTTHUMG00000130489.6	SRRM3	HGNC:26729
ENSG00000173175.14	131.262	-0.664501	0.191835	6.84945e-05	0.000542023	OTTHUMG00000159517.6	ADCY5	HGNC:236
ENSG00000273117.1	111.86	-0.830702	0.246722	6.93083e-05	0.000547988	OTTHUMG00000186379.1	AC144652.1
ENSG00000125744.12	317.53	-0.587934	0.167292	6.99498e-05	0.00055217	OTTHUMG00000182123.2	RTN2	HGNC:10468
ENSG00000172936.14	120.245	0.788356	0.233201	6.9958e-05	0.00055217	OTTHUMG00000131083.11	MYD88	HGNC:7562
ENSG00000232882.1	12.8293	2.52646	0.767565	7.03387e-05	0.000554473	OTTHUMG00000057595.1	PHKA1P1	HGNC:33919
ENSG00000154237.13	98.566	0.755129	0.222357	7.10794e-05	0.000558932	OTTHUMG00000165514.6	LRRK1	HGNC:18608
ENSG00000245910.8	766.378	-0.638485	0.184172	7.109e-05	0.000558932	OTTHUMG00000164743.4	SNHG6	HGNC:32965
ENSG00000010610.10	18.1362	1.75942	0.551294	7.13669e-05	0.000560867	OTTHUMG00000168514.3	CD4	HGNC:1678
ENSG00000226268.3	14.7952	2.16237	0.674836	7.34854e-05	0.000576524	OTTHUMG00000166675.3	AC135977.1
ENSG00000104814.13	66.7434	-0.924253	0.279229	7.49463e-05	0.000586726	OTTHUMG00000180863.2	MAP4K1	HGNC:6863
ENSG00000161921.15	175.61	0.596537	0.171231	7.59581e-05	0.000593884	OTTHUMG00000090761.4	CXCL16	HGNC:16642
ENSG00000280239.1	85.894	0.764003	0.226264	7.607e-05	0.000594505	OTTHUMG00000182005.1	AC011498.7
ENSG00000267858.6	141.615	0.834906	0.250345	7.67539e-05	0.000599592	OTTHUMG00000183549.3	MZF1-AS1	HGNC:51271
ENSG00000184903.10	93.0431	-0.741672	0.219787	7.70956e-05	0.000601748	OTTHUMG00000155023.9	IMMP2L	HGNC:14598
ENSG00000219891.2	27.4446	1.19925	0.369862	7.70735e-05	0.000601748	OTTHUMG00000014502.2	ZSCAN12P1	HGNC:13850
ENSG00000287356.1	89.5056	-0.716055	0.211209	7.83742e-05	0.000610424	OTTHUMG00000193849.2	AL590822.3
ENSG00000136149.6	10.3124	-2.76209	0.823988	7.94189e-05	0.000617507	OTTHUMG00000016985.2	RPL13AP25	HGNC:36981
ENSG00000065518.8	806.454	-0.6381	0.185792	8.01143e-05	0.000621592	OTTHUMG00000159442.2	NDUFB4	HGNC:7699
ENSG00000162241.12	150.008	-0.621758	0.180281	8.05022e-05	0.000624072	OTTHUMG00000166255.4	SLC25A45	HGNC:27442
ENSG00000241935.9	54.6411	-0.871962	0.264887	8.1329e-05	0.000629413	OTTHUMG00000018859.5	HOGA1	HGNC:25155
ENSG00000227199.1	81.6577	-0.821629	0.247265	8.15872e-05	0.000630877	OTTHUMG00000039524.1	ST7-AS1	HGNC:16000
ENSG00000164841.5	117.138	0.6486	0.189966	8.21489e-05	0.000634415	OTTHUMG00000164881.2	TMEM74	HGNC:26409
ENSG00000101596.15	2194.18	0.584974	0.166987	8.23931e-05	0.000635763	OTTHUMG00000178235.5	SMCHD1	HGNC:29090
ENSG00000056558.11	146.154	-0.701293	0.209108	8.49181e-05	0.000651395	OTTHUMG00000020578.2	TRAF1	HGNC:12031
ENSG00000224631.4	20.5945	-1.46353	0.460468	8.58708e-05	0.000657324	OTTHUMG00000158168.2	RPS27AP16	HGNC:36855
ENSG00000218891.5	598.393	-0.635531	0.18617	8.69474e-05	0.000664729	OTTHUMG00000180857.5	ZNF579	HGNC:26646
ENSG00000178075.20	169.562	-0.838043	0.256567	8.81115e-05	0.000673066	OTTHUMG00000159340.5	GRAMD1C	HGNC:25252
ENSG00000257027.1	46.1154	-1.29153	0.414034	8.98913e-05	0.000684944	OTTHUMG00000168442.1	AC010186.3
ENSG00000221983.8	7867.4	-0.634127	0.186443	9.01379e-05	0.00068625	OTTHUMG00000183110.3	UBA52	HGNC:12458
ENSG00000099958.14	169.135	-0.749507	0.225586	9.02287e-05	0.000686655	OTTHUMG00000150743.2	DERL3	HGNC:14236
ENSG00000135083.15	134.175	0.645823	0.189864	9.02921e-05	0.000686852	OTTHUMG00000130325.6	CCNJL	HGNC:25876
ENSG00000205085.11	10.8055	2.97576	0.924607	9.03747e-05	0.000687194	OTTHUMG00000158275.4	FAM71F2	HGNC:27998
ENSG00000280383.1	49.8274	0.990133	0.307331	9.09621e-05	0.000691085	OTTHUMG00000189269.1	Z95331.1
ENSG00000174007.8	132.831	0.647435	0.190554	9.20046e-05	0.000698424	OTTHUMG00000153933.3	CEP19	HGNC:28209
ENSG00000213096.10	288.507	0.626442	0.184323	9.35484e-05	0.000707791	OTTHUMG00000183394.1	AC092279.1
ENSG00000176978.14	229.27	-0.597683	0.174533	9.3968e-05	0.000710672	OTTHUMG00000020977.4	DPP7	HGNC:14892
ENSG00000215910.7	56.0553	-1.30953	0.415236	9.44721e-05	0.000713598	OTTHUMG00000002228.2	C1orf167	HGNC:25262
ENSG00000225335.3	34.4099	1.38343	0.445082	9.44679e-05	0.000713598	OTTHUMG00000149968.2	AC016027.1
ENSG00000170122.5	46.1905	1.05956	0.330181	9.49001e-05	0.00071507	OTTHUMG00000021015.2	FOXD4	HGNC:3805
ENSG00000244405.8	30.0871	1.80394	0.586465	9.54822e-05	0.000718851	OTTHUMG00000156639.5	ETV5	HGNC:3494
ENSG00000132357.14	60.3466	0.8832	0.271328	9.61937e-05	0.000723472	OTTHUMG00000094775.9	CARD6	HGNC:16394
ENSG00000286699.1	69.8791	-0.997939	0.311553	9.62148e-05	0.000723472	OTTHUMG00000194879.1	AC084198.4
ENSG00000141750.7	136.89	-0.635932	0.187633	9.66348e-05	0.000725734	OTTHUMG00000179039.3	STAC2	HGNC:23990
ENSG00000288473.1	195.722	-0.596107	0.174584	9.82692e-05	0.000734687	OTTHUMG00000031263.3	AL669830.2
ENSG00000235688.2	43.815	-1.25657	0.402774	9.8608e-05	0.000736919	OTTHUMG00000151389.2	SNTG2-AS1	HGNC:54058
ENSG00000172197.11	138.616	-0.630608	0.186835	9.89153e-05	0.000738384	OTTHUMG00000014334.2	MBOAT1	HGNC:21579
ENSG00000260747.1	44.0867	-1.1674	0.366585	9.89253e-05	0.000738384	OTTHUMG00000177069.1	AC022968.1
ENSG00000273008.1	31.4839	-1.32323	0.424303	0.000100342	0.000747738	OTTHUMG00000186248.1	AC010864.1
ENSG00000215218.4	116.116	0.63975	0.189628	0.000101429	0.000754914	OTTHUMG00000161683.2	UBE2QL1	HGNC:37269
ENSG00000133863.8	544.268	0.683368	0.204933	0.000101516	0.000755254	OTTHUMG00000163881.4	TEX15	HGNC:11738
ENSG00000130244.12	275.555	-0.629578	0.185837	0.000103176	0.000765421	OTTHUMG00000182084.2	FAM98C	HGNC:27119
ENSG00000205744.10	122.013	-0.828993	0.255577	0.000103168	0.000765421	OTTHUMG00000180853.5	DENND1C	HGNC:26225
ENSG00000088340.16	166.469	-0.698458	0.209847	0.000103579	0.000767784	OTTHUMG00000032354.12	FER1L4	HGNC:15801
ENSG00000154783.12	67.7023	-0.83258	0.259077	0.000109332	0.000806507	OTTHUMG00000155556.7	FGD5	HGNC:19117
ENSG00000171174.15	45.2064	-0.949431	0.298451	0.000109943	0.000810483	OTTHUMG00000097833.4	RBKS	HGNC:30325
ENSG00000258334.1	28.5872	1.16316	0.373642	0.000111924	0.000822636	OTTHUMG00000169733.1	AC125611.4
ENSG00000154153.13	159.538	0.59799	0.177351	0.000112578	0.000825121	OTTHUMG00000161788.1	RETREG1	HGNC:25964
ENSG00000262468.6	106.446	-0.699476	0.213507	0.000112498	0.000825121	OTTHUMG00000177618.3	LINC01569	HGNC:51380
ENSG00000198918.8	4775.39	-0.589226	0.174437	0.000113846	0.000833279	OTTHUMG00000022278.2	RPL39	HGNC:10350
ENSG00000186994.11	122.844	-0.718716	0.219361	0.000114036	0.000833528	OTTHUMG00000182461.3	KANK3	HGNC:24796
ENSG00000177943.14	104.607	-0.618736	0.185041	0.000114562	0.000836977	OTTHUMG00000020951.8	MAMDC4	HGNC:24083
ENSG00000232320.6	37.2269	1.3193	0.431042	0.000114883	0.000838315	OTTHUMG00000153886.2	AC009299.2
ENSG00000188672.18	17.4923	-1.67737	0.553365	0.00011554	0.000842103	OTTHUMG00000007650.5	RHCE	HGNC:10008
ENSG00000149573.9	29.4598	1.17554	0.377003	0.000115744	0.000843252	OTTHUMG00000166967.4	MPZL2	HGNC:3496
ENSG00000249846.7	34.7817	-1.2501	0.408223	0.000117812	0.00085627	OTTHUMG00000159926.9	LINC02021	HGNC:52856
ENSG00000172164.15	234.144	0.637188	0.19167	0.000118069	0.000857115	OTTHUMG00000165041.5	SNTB1	HGNC:11168
ENSG00000123689.6	367.93	0.590658	0.175795	0.000118258	0.000858144	OTTHUMG00000036479.2	G0S2	HGNC:30229
ENSG00000224383.7	21.7455	-1.51664	0.495775	0.000118657	0.000860358	OTTHUMG00000178594.2	PRR29	HGNC:25673
ENSG00000163701.19	31.129	-1.18071	0.383739	0.00012085	0.000873822	OTTHUMG00000128649.5	IL17RE	HGNC:18439
ENSG00000219626.9	147.549	-0.667525	0.202296	0.000120905	0.000873822	OTTHUMG00000151901.4	FAM228B	HGNC:24736
ENSG00000119737.6	35.2898	1.34324	0.441646	0.000121834	0.000878862	OTTHUMG00000129280.3	GPR75	HGNC:4526
ENSG00000164061.5	465.936	-0.679621	0.207709	0.00012458	0.000895838	OTTHUMG00000133750.2	BSN	HGNC:1117
ENSG00000169981.11	132.627	0.646802	0.195917	0.000126726	0.000909477	OTTHUMG00000133091.13	ZNF35	HGNC:13099
ENSG00000215788.10	122.454	-0.649247	0.196913	0.000126821	0.000909623	OTTHUMG00000000831.9	TNFRSF25	HGNC:11910
ENSG00000146950.13	106.043	-1.0788	0.346725	0.000129316	0.000923356	OTTHUMG00000021121.3	SHROOM2	HGNC:630
ENSG00000266524.3	24.4383	-1.36931	0.456543	0.000130444	0.000929955	OTTHUMG00000188319.2	GDF10	HGNC:4215
ENSG00000196660.10	58.9761	0.957237	0.306882	0.000131218	0.000934378	OTTHUMG00000037434.3	SLC30A10	HGNC:25355
ENSG00000180096.12	62.2463	-1.03456	0.335721	0.000131426	0.000935498	OTTHUMG00000176984.5	SEPTIN1	HGNC:2879
ENSG00000186301.8	29.9341	-1.19693	0.394446	0.000136433	0.000968117	OTTHUMG00000057487.4	MST1P2	HGNC:7383
ENSG00000013364.19	149.675	-0.72413	0.225229	0.000137273	0.000972568	OTTHUMG00000048227.11	MVP	HGNC:7531
ENSG00000267110.1	7.57925	-3.30212	1.03742	0.000137553	0.000974172	OTTHUMG00000180667.3	AC010327.2
ENSG00000162813.18	1003.79	0.596643	0.18029	0.000140018	0.000989331	OTTHUMG00000037435.7	BPNT1	HGNC:1096
ENSG00000285427.1	62.4302	0.816519	0.257567	0.000140845	0.000994429	OTTHUMG00000192417.1	SOD2-OT1	HGNC:53445
ENSG00000100033.16	102.875	-0.641534	0.19686	0.000143069	0.00100894	OTTHUMG00000150163.5	PRODH	HGNC:9453
ENSG00000121413.12	219.333	-0.670011	0.206304	0.000143747	0.00101216	OTTHUMG00000183451.2	ZSCAN18	HGNC:21037
ENSG00000240036.4	8.16055	-3.26018	0.982968	0.000146067	0.00102572	OTTHUMG00000166149.1	AC104563.1
ENSG00000100427.15	43.268	0.979852	0.316167	0.000146465	0.00102812	OTTHUMG00000150236.3	MLC1	HGNC:17082
ENSG00000224389.9	24.1387	-1.19806	0.395444	0.000146527	0.00102816	OTTHUMG00000031187.6	C4B	HGNC:1324
ENSG00000286999.1	11.4874	-2.10349	0.710946	0.000146947	0.00103032	OTTHUMG00000195113.1	AL121581.2
ENSG00000196172.9	32.7113	-1.5384	0.509802	0.000147042	0.00103043	OTTHUMG00000150831.4	ZNF681	HGNC:26457
ENSG00000227999.1	20.4092	-1.5375	0.515568	0.000147654	0.00103369	OTTHUMG00000040844.2	MTND5P1	HGNC:39644
ENSG00000112246.9	136.365	0.746804	0.234882	0.000148772	0.00103992	OTTHUMG00000015275.3	SIM1	HGNC:10882
ENSG00000231584.8	261.764	-0.608905	0.186299	0.000151495	0.00105613	OTTHUMG00000155210.3	FAHD2CP	HGNC:44135
ENSG00000174137.12	65.5057	-0.770305	0.243388	0.000152267	0.00106021	OTTHUMG00000159855.6	FAM53A	HGNC:31860
ENSG00000179673.5	112.619	-0.772191	0.244261	0.000152415	0.00106021	OTTHUMG00000178187.2	RPRML	HGNC:32422
ENSG00000187720.14	266.408	-0.629044	0.193236	0.000152381	0.00106021	OTTHUMG00000133389.7	THSD4	HGNC:25835
ENSG00000163565.18	9.6515	2.68992	0.870515	0.000152706	0.00106138	OTTHUMG00000037108.6	IFI16	HGNC:5395
ENSG00000275582.1	16.337	-1.55062	0.528111	0.00015309	0.00106319	OTTHUMG00000186598.1	AL031670.1
ENSG00000182103.5	51.1643	-0.955993	0.314305	0.000155003	0.00107484	OTTHUMG00000166869.2	FAM181B	HGNC:28512
ENSG00000282051.1	21.4973	-1.70175	0.573241	0.000155456	0.00107758	OTTHUMG00000182072.3	AC010507.1
ENSG00000214338.10	152.212	-0.941913	0.308145	0.000157553	0.00109005	OTTHUMG00000166438.2	SOGA3	HGNC:21494
ENSG00000249459.10	137.391	0.678148	0.211053	0.000161535	0.00111514	OTTHUMG00000178136.8	ZNF286B	HGNC:33241
ENSG00000135409.11	23.4558	-1.23645	0.415569	0.00016544	0.00113944	OTTHUMG00000170048.4	AMHR2	HGNC:465
ENSG00000102904.14	95.0803	-0.668104	0.208557	0.000166019	0.00114299	OTTHUMG00000137545.7	TSNAXIP1	HGNC:18586
ENSG00000164879.7	14.2359	1.56738	0.52428	0.000168265	0.00115671	OTTHUMG00000164942.3	CA3	HGNC:1374
ENSG00000228748.2	64.3662	-0.863188	0.280464	0.000170137	0.00116782	OTTHUMG00000018545.2	AL450306.1
ENSG00000232611.1	63.4651	-0.896418	0.29507	0.000170498	0.00116986	OTTHUMG00000022515.2	AL683813.2
ENSG00000163840.10	132.168	0.703787	0.222268	0.000172892	0.00118273	OTTHUMG00000159524.3	DTX3L	HGNC:30323
ENSG00000121966.7	146.748	0.710008	0.224919	0.000177802	0.0012145	OTTHUMG00000153583.2	CXCR4	HGNC:2561
ENSG00000150961.15	957.279	0.591251	0.181742	0.000178473	0.00121817	OTTHUMG00000132957.8	SEC24D	HGNC:10706
ENSG00000205592.14	15.207	1.76077	0.608014	0.00018334	0.00124628	OTTHUMG00000060732.36	MUC19	HGNC:14362
ENSG00000233954.6	849.488	-0.959246	0.318435	0.000184607	0.00125442	OTTHUMG00000003109.3	UQCRHL	HGNC:51714
ENSG00000172476.4	150.135	-0.628383	0.196315	0.000186054	0.00126237	OTTHUMG00000022100.2	RAB40A	HGNC:18283
ENSG00000100097.12	145.208	-0.860417	0.28232	0.000188325	0.00127456	OTTHUMG00000150661.2	LGALS1	HGNC:6561
ENSG00000223745.8	341.451	-0.78029	0.253118	0.000188339	0.00127456	OTTHUMG00000010705.14	CCDC18-AS1	HGNC:52262
ENSG00000226360.5	15.4381	-1.66811	0.575409	0.000188881	0.0012771	OTTHUMG00000157304.1	RPL10AP6	HGNC:36504
ENSG00000236017.8	129.455	-0.659236	0.208571	0.000190804	0.00128934	OTTHUMG00000021056.3	ASMTL-AS1	HGNC:25811
ENSG00000117322.17	54.4148	0.823715	0.268812	0.00019202	0.00129612	OTTHUMG00000036307.2	CR2	HGNC:2336
ENSG00000149599.15	121.584	-0.690218	0.220109	0.000194471	0.00131024	OTTHUMG00000032182.7	DUSP15	HGNC:16236
ENSG00000126458.4	139.511	-0.758812	0.246167	0.000204779	0.00137462	OTTHUMG00000183247.2	RRAS	HGNC:10447
ENSG00000269930.1	21.4754	-1.31145	0.450175	0.000205584	0.00137952	OTTHUMG00000183912.1	AC091057.4
ENSG00000143382.15	63.066	-0.900099	0.300887	0.000206092	0.00138242	OTTHUMG00000034863.6	ADAMTSL4	HGNC:19706
ENSG00000188985.6	31.7505	1.36075	0.475438	0.000208003	0.00139385	OTTHUMG00000179427.2	DHFRP1	HGNC:2862
ENSG00000102109.9	799.886	-0.674154	0.215715	0.000209508	0.00140276	OTTHUMG00000034502.4	PCSK1N	HGNC:17301
ENSG00000237506.3	10.3989	-2.23069	0.759294	0.00021039	0.00140709	OTTHUMG00000021947.1	RPSAP15	HGNC:31464
ENSG00000127589.4	8.91813	-2.42575	0.818057	0.000211065	0.00140905	OTTHUMG00000163834.1	TUBBP1	HGNC:12414
ENSG00000139178.11	61.5451	-0.793096	0.261375	0.000214761	0.00142861	OTTHUMG00000168144.4	C1RL	HGNC:21265
ENSG00000247627.2	30916.1	-1.18993	0.41683	0.000219303	0.00145343	OTTHUMG00000163066.1	MTND4P12	HGNC:42199
ENSG00000286443.1	24.2272	-1.38248	0.485892	0.000219919	0.00145699	OTTHUMG00000195428.1	AC091178.2
ENSG00000114737.15	68.336	-0.749709	0.244887	0.00022217	0.00146977	OTTHUMG00000156853.1	CISH	HGNC:1984
ENSG00000103089.9	22.3175	1.29161	0.451169	0.00022314	0.00147479	OTTHUMG00000137603.6	FA2H	HGNC:21197
ENSG00000139160.13	41.6201	-0.963482	0.327482	0.000223172	0.00147479	OTTHUMG00000169085.3	ETFBKMT	HGNC:28739
ENSG00000213741.10	1925.81	-0.615685	0.195487	0.000223427	0.00147507	OTTHUMG00000140272.6	RPS29	HGNC:10419
ENSG00000178522.14	77.2296	0.819329	0.270158	0.000224341	0.00147931	OTTHUMG00000129913.2	AMBN	HGNC:452
ENSG00000214870.9	63.6319	-0.774249	0.254501	0.000226446	0.00149211	OTTHUMG00000152806.23	AC004540.1
ENSG00000242282.6	42.3458	-1.29969	0.45169	0.000227616	0.00149874	OTTHUMG00000151418.2	AC108488.1
ENSG00000183114.8	127.183	-0.706467	0.229329	0.000231596	0.00152056	OTTHUMG00000057491.2	FAM43B	HGNC:31791
ENSG00000261832.6	107.322	1.03309	0.356337	0.000231755	0.00152106	OTTHUMG00000175737.3	AC138894.1
ENSG00000144908.13	74.806	-1.14897	0.396281	0.000232454	0.00152355	OTTHUMG00000125551.4	ALDH1L1	HGNC:3978
ENSG00000249485.1	15.5986	-1.83933	0.636132	0.00023285	0.00152496	OTTHUMG00000161817.1	RBBP4P1	HGNC:42368
ENSG00000165507.9	208.578	0.692286	0.224563	0.000234453	0.00153271	OTTHUMG00000018063.4	DEPP1	HGNC:23355
ENSG00000104883.8	70.1785	-0.745035	0.244593	0.000234653	0.0015332	OTTHUMG00000182044.2	PEX11G	HGNC:20208
ENSG00000165171.11	25.5837	-1.1601	0.406081	0.00023684	0.00154445	OTTHUMG00000130033.3	METTL27	HGNC:19068
ENSG00000137628.17	184.846	-0.62328	0.200137	0.000237144	0.00154588	OTTHUMG00000161350.3	DDX60	HGNC:25942
ENSG00000006534.16	89.6144	-0.688382	0.22365	0.000237875	0.00154954	OTTHUMG00000154910.7	ALDH3B1	HGNC:410
ENSG00000118898.16	66.1043	-0.774377	0.257315	0.000239059	0.00155614	OTTHUMG00000129528.9	PPL	HGNC:9273
ENSG00000188993.3	58.7153	1.02861	0.350819	0.000243659	0.00158439	OTTHUMG00000160623.1	LRRC66	HGNC:34299
ENSG00000168143.9	92.6537	0.703611	0.230114	0.000245892	0.00159607	OTTHUMG00000014899.2	FAM83B	HGNC:21357
ENSG00000261335.1	87.5642	-0.701692	0.230006	0.000248371	0.0016093	OTTHUMG00000176088.1	AC005837.1
ENSG00000146677.7	7.38704	-3.21433	1.03688	0.000255154	0.00164683	OTTHUMG00000155305.2	AC004453.1
ENSG00000117595.12	32.1949	-1.15123	0.405672	0.000255912	0.00165114	OTTHUMG00000036521.4	IRF6	HGNC:6121
ENSG00000170775.3	29.1841	1.11291	0.388321	0.000256649	0.00165473	OTTHUMG00000157197.2	GPR37	HGNC:4494
ENSG00000167103.12	38.86	-0.984369	0.337895	0.000258011	0.00166174	OTTHUMG00000020719.5	PIP5KL1	HGNC:28711
ENSG00000138496.16	135.881	0.58906	0.187524	0.000259543	0.00167102	OTTHUMG00000159522.3	PARP9	HGNC:24118
ENSG00000188487.11	43.8669	0.971798	0.333643	0.000259766	0.00167187	OTTHUMG00000165838.3	INSC	HGNC:33116
ENSG00000253251.3	62.3286	0.911277	0.311612	0.000260185	0.00167351	OTTHUMG00000162694.7	SHLD3	HGNC:53826
ENSG00000215210.3	7.04377	-3.30212	1.07537	0.000260524	0.00167498	OTTHUMG00000019727.1	RBMXP2	HGNC:23284
ENSG00000108932.12	123.469	-0.810508	0.27533	0.00026748	0.00171307	OTTHUMG00000179812.4	SLC16A6	HGNC:10927
ENSG00000163888.4	51.7733	-0.90753	0.311458	0.000267641	0.0017135	OTTHUMG00000156821.2	CAMK2N2	HGNC:24197
ENSG00000261609.7	143.951	0.684727	0.225351	0.000270672	0.00172867	OTTHUMG00000137627.7	GAN	HGNC:4137
ENSG00000250846.6	24.1954	-1.27741	0.462037	0.000273377	0.00174411	OTTHUMG00000161982.1	EPHA5-AS1	HGNC:50602
ENSG00000221883.3	46.5767	-0.90148	0.310538	0.000275615	0.00175594	OTTHUMG00000156672.2	ARIH2OS	HGNC:34425
ENSG00000231764.10	196.243	-0.591435	0.190336	0.000279184	0.0017725	OTTHUMG00000154198.11	DLX6-AS1	HGNC:37151
ENSG00000256542.2	122.088	-0.721418	0.240617	0.000285902	0.001812	OTTHUMG00000167958.3	AC148477.2
ENSG00000165621.8	42.3734	0.876017	0.301789	0.000289039	0.00182998	OTTHUMG00000017236.6	OXGR1	HGNC:4531
ENSG00000272540.1	375.474	0.794128	0.269968	0.000292618	0.00185008	OTTHUMG00000185724.1	AL662797.2
ENSG00000129990.15	10.6927	-1.6517	0.601542	0.000294463	0.00185981	OTTHUMG00000180669.4	SYT5	HGNC:11513
ENSG00000166546.14	55.2308	-0.869725	0.30232	0.000306289	0.0019285	OTTHUMG00000173370.7	BEAN1	HGNC:24160
ENSG00000116032.5	14.739	-1.58458	0.574333	0.000309798	0.00194523	OTTHUMG00000181904.1	GRIN3B	HGNC:16768
ENSG00000260005.6	67.3429	-0.761217	0.258668	0.000312344	0.00195987	OTTHUMG00000132137.2	AC027601.2
ENSG00000215835.2	53.6209	-0.929234	0.324085	0.000319237	0.00199559	OTTHUMG00000034702.1	AL596087.1
ENSG00000123096.11	86.6773	-0.680575	0.227813	0.00032	0.00199967	OTTHUMG00000169167.4	SSPN	HGNC:11322
ENSG00000259954.1	8.51468	2.86924	1.01459	0.00032257	0.00201207	OTTHUMG00000176806.1	IL21R-AS1	HGNC:27551
ENSG00000165186.12	20.5074	1.55369	0.561912	0.000329066	0.00204722	OTTHUMG00000021251.3	PTCHD1	HGNC:26392
ENSG00000240755.1	6.34303	4.08731	1.50184	0.000329252	0.00204768	OTTHUMG00000155493.1	ERLEC1P1	HGNC:38012
ENSG00000184113.9	18.4107	1.33016	0.484937	0.000329761	0.00204945	OTTHUMG00000150441.5	CLDN5	HGNC:2047
ENSG00000242759.8	22.3817	-1.51898	0.547757	0.000331128	0.00205725	OTTHUMG00000195985.1	LINC00882	HGNC:48568
ENSG00000188643.11	28.502	-1.12906	0.406363	0.000331349	0.00205793	OTTHUMG00000013545.5	S100A16	HGNC:20441
ENSG00000133710.15	17.4361	1.47358	0.540498	0.00034649	0.00214032	OTTHUMG00000134305.8	SPINK5	HGNC:15464
ENSG00000070404.10	167.471	-0.642023	0.214041	0.000350238	0.00215909	OTTHUMG00000180593.15	FSTL3	HGNC:3973
ENSG00000237505.8	23.912	-1.319	0.486337	0.000356794	0.0021958	OTTHUMG00000010024.8	PKN2-AS1	HGNC:50597
ENSG00000100285.10	20.4345	1.55361	0.583073	0.000359859	0.00220946	OTTHUMG00000151155.3	NEFH	HGNC:7737
ENSG00000273297.2	78.7378	0.662659	0.223073	0.00036713	0.0022458	OTTHUMG00000186342.17	AC009275.1
ENSG00000101311.15	68.0804	0.665493	0.225036	0.000371313	0.00226759	OTTHUMG00000031826.4	FERMT1	HGNC:15889
ENSG00000227766.1	22.1348	-1.46335	0.562757	0.000371442	0.00226762	OTTHUMG00000031152.2	AL671277.1
ENSG00000197647.11	7.88073	-3.89341	1.40372	0.000372998	0.00227484	OTTHUMG00000156427.4	ZNF433	HGNC:20811
ENSG00000095383.20	108.84	-0.645587	0.217913	0.000373567	0.00227679	OTTHUMG00000020343.5	TBC1D2	HGNC:18026
ENSG00000273275.1	60.1903	1.1067	0.409578	0.000379832	0.00230943	OTTHUMG00000185954.1	AC017083.2
ENSG00000173406.15	52.9852	0.821091	0.289484	0.000385549	0.00233735	OTTHUMG00000008391.7	DAB1	HGNC:2661
ENSG00000112333.11	38.4664	0.927604	0.331382	0.000387958	0.00235039	OTTHUMG00000015319.7	NR2E1	HGNC:7973
ENSG00000111262.6	14.1196	1.72671	0.653806	0.000392224	0.00237484	OTTHUMG00000044398.5	KCNA1	HGNC:6218
ENSG00000186496.12	119.184	-0.65822	0.223522	0.000393173	0.00237961	OTTHUMG00000132562.8	ZNF396	HGNC:18824
ENSG00000227008.2	14.7853	-1.65959	0.624255	0.000393574	0.00238125	OTTHUMG00000022439.1	AL009174.1
ENSG00000178464.6	27.0516	-1.18126	0.438262	0.000395934	0.00239157	OTTHUMG00000156400.1	RPL10P16	HGNC:36882
ENSG00000224854.3	8.7878	2.41854	0.866979	0.000395933	0.00239157	OTTHUMG00000019687.1	CDKN2A-DT	HGNC:23831
ENSG00000275367.1	29.2759	-1.16308	0.43491	0.000399987	0.00241366	OTTHUMG00000187119.1	AC092111.1
ENSG00000273253.2	79.4894	-0.733388	0.25542	0.00040458	0.00243494	OTTHUMG00000186123.4	AL022328.4
ENSG00000047662.5	15.4388	1.81126	0.695502	0.000412747	0.00248001	OTTHUMG00000160287.3	FAM184B	HGNC:29235
ENSG00000274225.1	13.2271	-1.81429	0.703247	0.0004147	0.00248993	OTTHUMG00000186520.1	AP001065.3
ENSG00000161992.6	41.5017	-0.987147	0.361665	0.000424094	0.00253817	OTTHUMG00000154104.2	PRR35	HGNC:14139
ENSG00000186377.8	27.3933	1.13914	0.424591	0.000424036	0.00253817	OTTHUMG00000008017.2	CYP4X1	HGNC:20244
ENSG00000104044.16	105.48	-0.603563	0.203931	0.00042631	0.0025506	OTTHUMG00000128871.4	OCA2	HGNC:8101
ENSG00000279863.1	14.8798	-1.61083	0.605693	0.000426674	0.00255194	OTTHUMG00000187416.1	AC069547.1
ENSG00000164120.14	68.8737	0.693883	0.240263	0.000427818	0.00255667	OTTHUMG00000160772.8	HPGD	HGNC:5154
ENSG00000135253.14	71.542	-0.779572	0.274718	0.000429785	0.00256551	OTTHUMG00000158363.7	KCP	HGNC:17585
ENSG00000278743.1	10.1228	-2.09603	0.809619	0.000438	0.00260434	OTTHUMG00000187136.1	AC087239.1
ENSG00000114268.12	373.726	-0.670842	0.232237	0.000439734	0.00261295	OTTHUMG00000133528.20	PFKFB4	HGNC:8875
ENSG00000129455.15	24.8369	-1.33843	0.514656	0.000440024	0.00261382	OTTHUMG00000183086.3	KLK8	HGNC:6369
ENSG00000170293.9	186.169	-0.603738	0.204903	0.000440352	0.00261492	OTTHUMG00000130753.3	CMTM8	HGNC:19179
ENSG00000226200.7	129.668	-0.618602	0.211421	0.000443428	0.00262891	OTTHUMG00000018230.4	SGMS1-AS1	HGNC:49683
ENSG00000269343.8	292.521	0.63127	0.216191	0.000447249	0.00264642	OTTHUMG00000183479.6	ZNF587B	HGNC:37142
ENSG00000099260.11	27.5645	1.09101	0.409027	0.000454606	0.00268213	OTTHUMG00000010764.3	PALMD	HGNC:15846
ENSG00000105664.11	107.197	-0.659171	0.227097	0.000457069	0.00269406	OTTHUMG00000169318.4	COMP	HGNC:2227
ENSG00000104808.8	19.3821	-1.3665	0.532236	0.000457746	0.00269718	OTTHUMG00000165029.2	DHDH	HGNC:17887
ENSG00000271736.2	7.07684	2.29209	0.85969	0.000458196	0.00269895	OTTHUMG00000185718.5	LINC02772	HGNC:54292
ENSG00000203780.11	29.2132	-1.25803	0.483923	0.000462458	0.0027173	OTTHUMG00000019241.7	FANK1	HGNC:23527
ENSG00000069493.15	150.152	-0.648935	0.225382	0.000464685	0.00272838	OTTHUMG00000168369.9	CLEC2D	HGNC:14351
ENSG00000172638.13	78.7298	-0.683817	0.238912	0.000465005	0.00272938	OTTHUMG00000166664.8	EFEMP2	HGNC:3219
ENSG00000187808.5	47.2237	-0.996911	0.372016	0.000470558	0.00275755	OTTHUMG00000159606.2	SOWAHD	HGNC:32960
ENSG00000119411.11	35.8073	0.92299	0.339298	0.000472583	0.00276764	OTTHUMG00000021006.3	BSPRY	HGNC:18232
ENSG00000181585.6	52.5525	-0.939769	0.346522	0.000484815	0.0028284	OTTHUMG00000149909.3	TMIE	HGNC:30800
ENSG00000274750.2	65.9363	0.768549	0.274314	0.000487307	0.00284202	OTTHUMG00000014434.3	H3C6	HGNC:4769
ENSG00000285669.1	27.6055	1.09828	0.407125	0.000489632	0.00285119	OTTHUMG00000192824.1	AC026979.4
ENSG00000139329.5	32.579	0.918103	0.337562	0.00049002	0.00285239	OTTHUMG00000170074.3	LUM	HGNC:6724
ENSG00000234147.1	47.9988	-0.897688	0.330094	0.000490491	0.00285347	OTTHUMG00000015700.1	AL035446.1
ENSG00000230715.3	42.3814	-0.970005	0.360584	0.000491172	0.00285636	OTTHUMG00000158226.1	AC018638.2
ENSG00000185924.7	113.322	0.587115	0.20033	0.000499729	0.00290059	OTTHUMG00000180184.3	RTN4RL1	HGNC:21329
ENSG00000249196.6	97.5793	-2.12208	0.767555	0.000499648	0.00290059	OTTHUMG00000168401.1	TMEM132D-AS1	HGNC:27466
ENSG00000197191.6	65.1463	-0.760818	0.27279	0.000501064	0.00290741	OTTHUMG00000153383.3	CYSRT1	HGNC:30529
ENSG00000272767.1	20.0034	-1.29661	0.506446	0.000512745	0.00296177	OTTHUMG00000186280.1	JMJD1C-AS1	HGNC:28222
ENSG00000235257.9	41.5573	-0.859815	0.317746	0.000521261	0.00300173	OTTHUMG00000155924.6	ITGA9-AS1	HGNC:49668
ENSG00000226686.8	30.9515	-1.108	0.420365	0.000522797	0.00300738	OTTHUMG00000048167.3	LINC01535	HGNC:51282
ENSG00000240731.1	38.7171	0.921431	0.34213	0.000522657	0.00300738	OTTHUMG00000003331.1	AL139287.1
ENSG00000183242.11	25.7977	1.09023	0.416573	0.000526348	0.00302435	OTTHUMG00000039557.3	WT1-AS	HGNC:18135
ENSG00000197380.11	130.969	-0.711839	0.253782	0.000530422	0.00304393	OTTHUMG00000153070.4	DACT3	HGNC:30745
ENSG00000163633.12	18.7357	-1.34996	0.531272	0.00053092	0.00304563	OTTHUMG00000130597.5	C4orf36	HGNC:28386
ENSG00000236423.6	25.9294	1.08013	0.411409	0.000540585	0.00309448	OTTHUMG00000041129.3	LINC01134	HGNC:49449
ENSG00000234311.1	16.1328	-1.44367	0.571129	0.000545135	0.00311662	OTTHUMG00000019288.1	AL451069.3
ENSG00000120738.8	281.233	1.54934	0.636295	0.000553399	0.00315991	OTTHUMG00000129197.3	EGR1	HGNC:3238
ENSG00000181894.15	93.6644	0.611012	0.212651	0.000564257	0.00320626	OTTHUMG00000183453.4	ZNF329	HGNC:14209
ENSG00000198618.5	1101.65	-0.968922	0.372951	0.000571237	0.00323949	OTTHUMG00000074545.1	PPIAP22	HGNC:17236
ENSG00000261147.1	27.8344	1.10028	0.422778	0.000573052	0.00324777	OTTHUMG00000177211.1	AC091167.2
ENSG00000103647.13	92.569	0.624161	0.218038	0.000576785	0.00326589	OTTHUMG00000133288.6	CORO2B	HGNC:2256
ENSG00000187534.6	18.6022	-1.39889	0.551327	0.000580951	0.0032854	OTTHUMG00000182585.1	PRR13P5	HGNC:50618
ENSG00000169418.10	8.9656	-2.0999	0.818882	0.000589717	0.00332571	OTTHUMG00000037085.4	NPR1	HGNC:7943
ENSG00000180871.8	7.39575	3.08968	1.17868	0.000593448	0.0033416	OTTHUMG00000133107.4	CXCR2	HGNC:6027
ENSG00000136327.7	65.9791	-0.865904	0.326416	0.000597774	0.00336078	OTTHUMG00000028772.7	NKX2-8	HGNC:16364
ENSG00000230562.3	31.433	1.0019	0.386358	0.000626576	0.0035033	OTTHUMG00000153949.1	FAM133DP	HGNC:44192
ENSG00000165695.10	46.6981	-0.793103	0.296098	0.000639013	0.00356738	OTTHUMG00000021009.2	AK8	HGNC:26526
ENSG00000165125.20	3.0941	4.18389	2.40136	0.000644567	0.003594	OTTHUMG00000157158.8	TRPV6	HGNC:14006
ENSG00000283149.1	183.989	0.647557	0.232381	0.000649567	0.00361306	OTTHUMG00000191653.1	AC068631.3
ENSG00000198237.8	21.4802	-1.32979	0.536262	0.000651023	0.00362005	OTTHUMG00000164581.1	AC131392.1
ENSG00000140403.12	18.2477	1.32874	0.535367	0.000660237	0.00366237	OTTHUMG00000143733.8	DNAJA4	HGNC:14885
ENSG00000259291.2	155.41	-0.692601	0.25404	0.000663828	0.00367671	OTTHUMG00000172032.2	ZNF710-AS1	HGNC:53141
ENSG00000279569.1	134.346	0.700707	0.257194	0.000667185	0.00369083	OTTHUMG00000177024.1	AC020763.4
ENSG00000286149.1	13.7025	-1.84779	0.739988	0.000673199	0.00371397	OTTHUMG00000193761.1	FP236383.11
ENSG00000286155.1	13.7025	-1.84779	0.739988	0.000673199	0.00371397	OTTHUMG00000193753.1	FP671120.11
ENSG00000286267.1	13.7025	-1.84779	0.739988	0.000673199	0.00371397	OTTHUMG00000193757.1	FP236383.13
ENSG00000260423.2	25.1702	-1.00057	0.394055	0.000688579	0.00378967	OTTHUMG00000172909.11	LINC02367	HGNC:53290
ENSG00000115339.14	36.1839	0.857296	0.326332	0.000688983	0.00379076	OTTHUMG00000132157.12	GALNT3	HGNC:4125
ENSG00000181856.15	90.0145	-0.775896	0.293515	0.000709747	0.00388391	OTTHUMG00000102181.6	SLC2A4	HGNC:11009
ENSG00000267244.5	72.7365	-0.784725	0.298665	0.000719662	0.00392893	OTTHUMG00000179992.3	AC012615.6
ENSG00000217648.1	17.1696	1.15457	0.462681	0.000724912	0.00395273	OTTHUMG00000015724.1	AL136116.3
ENSG00000171435.14	74.9993	0.762211	0.287301	0.000729616	0.00397482	OTTHUMG00000169020.4	KSR2	HGNC:18610
ENSG00000214455.4	44.2994	-0.815421	0.315807	0.000750591	0.00406726	OTTHUMG00000016852.1	RCN1P2	HGNC:39204
ENSG00000176046.8	534.067	0.600805	0.216096	0.000753702	0.00407928	OTTHUMG00000131764.3	NUPR1	HGNC:29990
ENSG00000267348.3	53.8363	0.714327	0.267217	0.000758587	0.00410329	OTTHUMG00000181770.3	GEMIN7-AS1	HGNC:53773
ENSG00000116833.14	95.7659	0.594749	0.213464	0.000761011	0.00411275	OTTHUMG00000035635.6	NR5A2	HGNC:7984
ENSG00000239569.3	16.1105	-1.37864	0.575825	0.000763338	0.0041241	OTTHUMG00000157280.1	KMT2E-AS1	HGNC:40845
ENSG00000130844.18	33.0935	-0.952095	0.379564	0.000764882	0.00412878	OTTHUMG00000163019.10	ZNF331	HGNC:15489
ENSG00000182685.7	63.7302	0.654943	0.23982	0.000764835	0.00412878	OTTHUMG00000128831.3	BRICD5	HGNC:28309
ENSG00000226091.7	79.6104	-0.655301	0.241496	0.000766032	0.00413255	OTTHUMG00000168663.1	LINC00937	HGNC:48629
ENSG00000272702.1	24.902	-1.25272	0.521819	0.000781364	0.00420533	OTTHUMG00000185982.2	AC010913.1
ENSG00000259605.3	153.34	-0.617388	0.224203	0.000783622	0.00421499	OTTHUMG00000172207.4	AC074212.1
ENSG00000226049.3	45.5452	0.781181	0.297454	0.000785637	0.00422459	OTTHUMG00000166422.1	TLK2P1	HGNC:18048
ENSG00000144339.12	20.7	1.10394	0.44947	0.000786526	0.00422813	OTTHUMG00000132723.5	TMEFF2	HGNC:11867
ENSG00000175920.18	32.0563	-1.0213	0.413421	0.00079633	0.00427329	OTTHUMG00000122087.8	DOK7	HGNC:26594
ENSG00000273145.1	57.6608	-0.68943	0.258238	0.000808287	0.00432982	OTTHUMG00000170172.1	BX537318.1
ENSG00000216285.5	141.78	0.70286	0.264754	0.000812076	0.00434884	OTTHUMG00000170174.1	AC078819.1
ENSG00000205832.7	24.0766	-1.1134	0.46126	0.000815898	0.00436675	OTTHUMG00000176519.2	C16orf96	HGNC:40031
ENSG00000286760.1	59.5601	-0.768068	0.294225	0.000815672	0.00436675	OTTHUMG00000195184.1	AL022069.3
ENSG00000286952.1	13.9318	1.7879	0.772595	0.000824274	0.00440127	OTTHUMG00000195622.1	AC093928.1
ENSG00000158050.5	10.5401	-1.71295	0.746104	0.000826579	0.00441099	OTTHUMG00000130456.3	DUSP2	HGNC:3068
ENSG00000079385.22	8.7393	-1.65405	0.700616	0.000830495	0.00442672	OTTHUMG00000151078.8	CEACAM1	HGNC:1814
ENSG00000287908.1	24.0766	-1.56066	0.66174	0.000831214	0.00442823	OTTHUMG00000193795.1	AC025165.6
ENSG00000169330.9	186.649	0.596609	0.217532	0.000841674	0.00447565	OTTHUMG00000172073.2	MINAR1	HGNC:29172
ENSG00000279641.1	26.4017	1.02759	0.416133	0.000842124	0.00447565	OTTHUMG00000178009.2	AC120057.3
ENSG00000162722.9	55.0285	-0.701091	0.265627	0.000847122	0.00449698	OTTHUMG00000040203.2	TRIM58	HGNC:24150
ENSG00000241061.3	6.22102	-3.38781	1.25265	0.000852264	0.00451903	OTTHUMG00000157866.1	RPL5P1	HGNC:10361
ENSG00000111674.9	626.997	-0.603351	0.22149	0.000861627	0.00455809	OTTHUMG00000168967.5	ENO2	HGNC:3353
ENSG00000215612.8	483.703	-0.628646	0.233648	0.000880358	0.00464373	OTTHUMG00000160012.20	HMX1	HGNC:5017
ENSG00000264668.2	20.8845	-1.67546	0.758671	0.000882718	0.00465216	OTTHUMG00000179773.3	AC138696.1
ENSG00000198780.12	610.365	0.587816	0.214995	0.00089982	0.00472457	OTTHUMG00000162930.6	FAM169A	HGNC:29138
ENSG00000120451.10	118.033	-0.588394	0.216885	0.000916483	0.0047969	OTTHUMG00000165663.1	SNX19	HGNC:21532
ENSG00000123243.15	79.1996	-0.709133	0.272511	0.000962029	0.00499807	OTTHUMG00000017635.7	ITIH5	HGNC:21449
ENSG00000129152.4	35.0272	-0.919831	0.377234	0.000973017	0.00504368	OTTHUMG00000166358.2	MYOD1	HGNC:7611
ENSG00000230454.1	58.2217	-0.722817	0.281235	0.000977388	0.00506059	OTTHUMG00000156937.1	U73166.1
ENSG00000184451.5	67.1335	-0.652637	0.247203	0.000977803	0.00506131	OTTHUMG00000132301.4	CCR10	HGNC:4474
ENSG00000258653.3	48.1189	0.835243	0.333919	0.000979215	0.00506718	OTTHUMG00000171256.2	AC005520.3
ENSG00000126467.11	11.7112	-1.70173	0.785975	0.000984757	0.00509009	OTTHUMG00000183249.3	TSKS	HGNC:30719
ENSG00000169594.13	35.2063	0.818512	0.327907	0.000988401	0.00510604	OTTHUMG00000147362.2	BNC1	HGNC:1081
ENSG00000232472.1	29.9453	-0.960493	0.400064	0.00102626	0.00527181	OTTHUMG00000021274.1	EEF1B2P3	HGNC:3210
ENSG00000220804.8	54.194	0.807634	0.324181	0.00103725	0.00531831	OTTHUMG00000151386.6	LINC01881	HGNC:52700
ENSG00000110042.8	26.2111	-1.12189	0.486701	0.00103851	0.00532077	OTTHUMG00000167336.3	DTX4	HGNC:29151
ENSG00000183463.6	11.5683	-1.51515	0.669725	0.00103882	0.00532077	OTTHUMG00000186217.2	URAD	HGNC:17785
ENSG00000130052.13	142.902	-0.600288	0.225974	0.00104928	0.00536444	OTTHUMG00000021748.2	STARD8	HGNC:19161
ENSG00000256124.6	27.6986	1.05773	0.444324	0.00105655	0.00539368	OTTHUMG00000168039.8	LINC01152	HGNC:16752
ENSG00000183091.19	53.9129	0.758806	0.301717	0.0010667	0.0054337	OTTHUMG00000153784.16	NEB	HGNC:7720
ENSG00000142661.19	8.10029	-1.85398	0.848934	0.00107049	0.00544999	OTTHUMG00000002969.4	MYOM3	HGNC:26679
ENSG00000261455.1	161.874	-0.590141	0.221141	0.00107905	0.00548135	OTTHUMG00000173415.1	LINC01003	HGNC:48957
ENSG00000255390.1	22.6003	-1.11156	0.477886	0.00109079	0.0055302	OTTHUMG00000165533.1	AC091564.4
ENSG00000255104.8	8.29992	3.14183	1.20123	0.00109215	0.00553559	OTTHUMG00000059066.14	AC005324.4
ENSG00000259895.1	20.0179	1.167	0.511166	0.00110148	0.00557898	OTTHUMG00000177050.1	AC106820.2
ENSG00000172461.11	11.2305	1.44583	0.646505	0.00110509	0.00559339	OTTHUMG00000015236.3	FUT9	HGNC:4020
ENSG00000115616.3	50.5058	0.67629	0.263319	0.00112304	0.00566759	OTTHUMG00000130778.3	SLC9A2	HGNC:11072
ENSG00000048540.15	7.94253	-2.76071	1.10339	0.00112968	0.00569536	OTTHUMG00000168837.5	LMO3	HGNC:6643
ENSG00000221821.4	26.2589	-1.01465	0.44045	0.00114252	0.00575415	OTTHUMG00000156926.2	C6orf226	HGNC:34431
ENSG00000213398.8	73.5186	-0.616698	0.237825	0.00117825	0.00591454	OTTHUMG00000137551.6	LCAT	HGNC:6522
ENSG00000272030.1	23.9007	-0.982773	0.420435	0.00118008	0.00592049	OTTHUMG00000185745.1	AL162258.2
ENSG00000198723.11	43.5066	-0.819143	0.33926	0.001186	0.00594529	OTTHUMG00000157183.6	TEX45	HGNC:24745
ENSG00000138670.17	132.785	0.589109	0.224206	0.00120172	0.00601747	OTTHUMG00000160890.7	RASGEF1B	HGNC:24881
ENSG00000258314.3	15.4026	-1.16874	0.524785	0.0012358	0.00616787	OTTHUMG00000170342.4	AL589182.1
ENSG00000125740.14	101.126	0.954815	0.415146	0.00124174	0.00619414	OTTHUMG00000182122.3	FOSB	HGNC:3797
ENSG00000179066.8	23.7895	1.09414	0.481812	0.0012593	0.00627055	OTTHUMG00000187103.2	AC020907.1
ENSG00000271387.1	22.9878	-1.08374	0.479449	0.00126307	0.00628335	OTTHUMG00000185159.1	AL445228.3
ENSG00000117600.12	45.1848	0.813817	0.339862	0.00126688	0.00629779	OTTHUMG00000010763.2	PLPPR4	HGNC:23496
ENSG00000100346.18	25.0731	-1.2308	0.547389	0.00127701	0.00633891	OTTHUMG00000151096.2	CACNA1I	HGNC:1396
ENSG00000256576.2	59.2373	-0.725912	0.296751	0.00129788	0.00642329	OTTHUMG00000168255.2	LINC02361	HGNC:53283
ENSG00000177464.5	8.33168	-1.90372	0.860104	0.00131015	0.00647527	OTTHUMG00000182126.2	GPR4	HGNC:4497
ENSG00000197921.6	38.5583	-1.07995	0.485942	0.00131291	0.00648542	OTTHUMG00000000793.2	HES5	HGNC:19764
ENSG00000284292.1	166.051	0.682022	0.273573	0.00131976	0.00651394	OTTHUMG00000154553.3	AC004922.1
ENSG00000186056.10	74.0719	-0.669726	0.268097	0.00133154	0.00654911	OTTHUMG00000003706.3	MATN1-AS1	HGNC:40364
ENSG00000287707.1	22.6793	1.02445	0.452906	0.0013443	0.00659764	OTTHUMG00000195847.1	AC115284.4
ENSG00000287619.1	20.7971	-1.19649	0.546947	0.00134558	0.00660218	OTTHUMG00000194899.1	AL021308.1
ENSG00000225872.4	23.0625	-1.08123	0.486069	0.00135911	0.00665877	OTTHUMG00000048120.4	LINC01529	HGNC:51268
ENSG00000188766.12	52.979	0.698	0.282447	0.00138114	0.00674627	OTTHUMG00000182082.4	SPRED3	HGNC:31041
ENSG00000260903.3	8.742	-2.14317	0.989538	0.00139118	0.00678402	OTTHUMG00000032198.4	XKR7	HGNC:23062
ENSG00000254838.5	26.5571	1.16462	0.538618	0.00139158	0.00678416	OTTHUMG00000165506.5	GVINP1	HGNC:25813
ENSG00000242689.3	29.6607	0.906676	0.393631	0.00140291	0.00682301	OTTHUMG00000137476.3	CNTF	HGNC:2169
ENSG00000261461.1	10.6072	-1.72867	0.786779	0.00143406	0.00695412	OTTHUMG00000176235.1	UBE2MP1	HGNC:32195
ENSG00000162069.16	46.9663	-0.814397	0.348385	0.00143521	0.00695787	OTTHUMG00000177452.3	BICDL2	HGNC:33584
ENSG00000154080.14	78.6035	0.627534	0.250088	0.00145712	0.0070491	OTTHUMG00000179469.5	CHST9	HGNC:19898
ENSG00000178977.3	10.5774	-1.70417	0.819472	0.00145633	0.0070491	OTTHUMG00000132866.4	LINC00324	HGNC:26628
ENSG00000251615.3	68.0386	0.725595	0.299549	0.00145859	0.00705437	OTTHUMG00000160053.5	AC104825.1
ENSG00000251485.1	21.2115	1.22957	0.574407	0.00145994	0.007059	OTTHUMG00000153352.1	AC068134.3
ENSG00000256966.6	90.1625	0.635293	0.254327	0.00148901	0.00716924	OTTHUMG00000168942.2	AL513165.2
ENSG00000233577.6	18.4851	-1.17755	0.555553	0.00149063	0.00717511	OTTHUMG00000150906.2	AL022332.1
ENSG00000255513.1	58.1124	-0.904426	0.397801	0.00149658	0.00720186	OTTHUMG00000166081.1	AC005363.1
ENSG00000127528.5	90.5189	-0.624626	0.249097	0.00149778	0.00720574	OTTHUMG00000182330.1	KLF2	HGNC:6347
ENSG00000247199.5	14.7985	1.28462	0.591357	0.00150462	0.00723103	OTTHUMG00000163558.5	AC011346.1
ENSG00000280303.2	32.7739	0.824564	0.352927	0.00150832	0.0072469	OTTHUMG00000164249.2	ERICD	HGNC:49404
ENSG00000125650.4	54.8251	0.697677	0.286232	0.00151694	0.00727875	OTTHUMG00000168086.3	PSPN	HGNC:9579
ENSG00000232656.8	79.142	0.631854	0.253934	0.00154532	0.00739357	OTTHUMG00000017535.5	IDI2-AS1	HGNC:30885
ENSG00000203326.12	4.59107	-3.06976	1.33387	0.0015594	0.00743488	OTTHUMG00000158277.5	ZNF525	HGNC:29423
ENSG00000260290.2	8.68355	-1.66109	0.780003	0.00155998	0.00743488	OTTHUMG00000176836.2	AC092115.2
ENSG00000131650.14	79.3982	-0.61022	0.243805	0.00158247	0.00752404	OTTHUMG00000128976.3	KREMEN2	HGNC:18797
ENSG00000269388.1	22.1738	-1.15523	0.546891	0.00158341	0.00752656	OTTHUMG00000183496.2	AC018755.3
ENSG00000273156.2	39.0535	-0.858495	0.376743	0.00158789	0.00753998	OTTHUMG00000186308.3	AC124016.3
ENSG00000102313.9	9.08077	1.56327	0.747373	0.00160415	0.00760337	OTTHUMG00000021634.3	ITIH6	HGNC:28907
ENSG00000237886.1	17.7497	-1.31083	0.633154	0.00161459	0.0076489	OTTHUMG00000020933.1	NALT1	HGNC:51192
ENSG00000164949.8	151.013	0.690318	0.287479	0.00162694	0.0076994	OTTHUMG00000164392.5	GEM	HGNC:4234
ENSG00000260469.3	22.8583	-0.961022	0.44007	0.00164074	0.00775293	OTTHUMG00000172684.4	INSYN1-AS1	HGNC:51422
ENSG00000128564.7	33.9286	-0.853441	0.378131	0.00165047	0.00778887	OTTHUMG00000157109.3	VGF	HGNC:12684
ENSG00000177791.12	9.14983	-1.61223	0.778227	0.00165053	0.00778887	OTTHUMG00000018466.2	MYOZ1	HGNC:13752
ENSG00000188818.12	190.435	0.644448	0.263223	0.00166174	0.00783571	OTTHUMG00000090319.5	ZDHHC11	HGNC:19158
ENSG00000266918.1	75.058	0.653273	0.269288	0.0016939	0.0079654	OTTHUMG00000181889.1	AC091132.3
ENSG00000279114.1	8.20175	-1.69728	0.884157	0.00169404	0.0079654	OTTHUMG00000185408.1	Z99129.3
ENSG00000134470.21	72.9093	0.600568	0.240842	0.00170098	0.00798774	OTTHUMG00000017612.7	IL15RA	HGNC:5978
ENSG00000277476.1	131.563	0.624324	0.254337	0.00171729	0.00804778	OTTHUMG00000186695.2	AC005332.5
ENSG00000279119.1	65.1227	-0.717504	0.303625	0.00171834	0.00804856	OTTHUMG00000192075.2	AC006449.9
ENSG00000123119.12	49.9732	-0.70517	0.298473	0.001722	0.00806161	OTTHUMG00000164009.2	NECAB1	HGNC:20983
ENSG00000198203.10	31.0858	-1.00022	0.461905	0.00177462	0.00825925	OTTHUMG00000153215.4	SULT1C2	HGNC:11456
ENSG00000164129.12	22.3124	0.901362	0.412657	0.00178372	0.0082974	OTTHUMG00000161353.3	NPY5R	HGNC:7958
ENSG00000186715.11	23.6953	-1.00696	0.477124	0.00182578	0.00844144	OTTHUMG00000002578.4	MST1L	HGNC:7390
ENSG00000286177.1	29.8173	0.766285	0.333274	0.00183337	0.00847012	OTTHUMG00000192986.1	AC011462.5
ENSG00000107968.10	65.2618	-0.615467	0.253227	0.00185616	0.00856244	OTTHUMG00000017889.6	MAP3K8	HGNC:6860
ENSG00000230658.2	30.7932	-0.844697	0.380272	0.00185935	0.00857497	OTTHUMG00000152580.3	KLHL7-DT	HGNC:43431
ENSG00000170190.16	76.6347	-0.626914	0.260329	0.00186068	0.00857676	OTTHUMG00000179277.5	SLC16A5	HGNC:10926
ENSG00000232150.3	62.9746	0.747486	0.326601	0.00187389	0.00862894	OTTHUMG00000016930.1	ST13P4	HGNC:18487
ENSG00000249962.1	97.6966	-0.735206	0.320711	0.00187943	0.00865229	OTTHUMG00000018721.1	AL157400.5
ENSG00000228288.7	47.1589	-0.768527	0.338977	0.00192964	0.00885209	OTTHUMG00000041399.3	PCAT6	HGNC:43714
ENSG00000166482.11	26.9396	0.865943	0.398317	0.00194971	0.00893084	OTTHUMG00000059585.6	MFAP4	HGNC:7035
ENSG00000257950.3	39.0482	0.715752	0.309323	0.00195369	0.00894234	OTTHUMG00000169623.2	P2RX5-TAX1BP3	HGNC:49191
ENSG00000106336.13	23.9695	-0.925313	0.435357	0.00197948	0.009031	OTTHUMG00000159543.5	FBXO24	HGNC:13595
ENSG00000271858.5	19.3109	-1.10398	0.539812	0.0019821	0.00904067	OTTHUMG00000185536.1	Z84492.1
ENSG00000273192.1	73.6378	0.602416	0.248269	0.00199878	0.0091054	OTTHUMG00000186143.1	AL671710.1
ENSG00000153165.18	49.0751	0.756715	0.336688	0.00202402	0.00919745	OTTHUMG00000153182.1	RGPD3	HGNC:32416
ENSG00000227081.5	6.79595	-1.93767	0.981832	0.00202585	0.00920347	OTTHUMG00000157388.2	AC005912.1
ENSG00000263818.5	23.3939	-1.13957	0.584229	0.00203176	0.00922574	OTTHUMG00000178956.1	RDM1P5	HGNC:53921
ENSG00000158815.11	35.184	0.791015	0.35672	0.00205061	0.00929515	OTTHUMG00000097051.3	FGF17	HGNC:3673
ENSG00000286445.1	8.40044	-1.49629	0.776001	0.00205025	0.00929515	OTTHUMG00000194827.1	AL355334.2
ENSG00000185834.10	22.7042	-1.05841	0.513016	0.00209713	0.00948718	OTTHUMG00000032779.1	RPL12P4	HGNC:16587
ENSG00000235859.5	53.3865	-0.645676	0.276156	0.00211603	0.00955377	OTTHUMG00000152767.1	AC006978.1
ENSG00000230409.3	69.4255	0.771826	0.350618	0.00212692	0.00959582	OTTHUMG00000186574.1	TCEA1P2	HGNC:29891
ENSG00000204287.14	20.0494	1.13136	0.5808	0.00218083	0.00980998	OTTHUMG00000031269.4	HLA-DRA	HGNC:4947
ENSG00000196646.12	57.9886	-0.70978	0.315648	0.0022272	0.00997271	OTTHUMG00000156429.8	ZNF136	HGNC:12920
ENSG00000286540.1	7.373	-3.01634	1.51063	0.00222738	0.00997271	OTTHUMG00000195446.1	AL096854.1
ENSG00000142632.17	58.1103	-0.640957	0.276871	0.00223794	0.0100136	OTTHUMG00000002219.5	ARHGEF19	HGNC:26604
ENSG00000153714.6	24.8752	0.966841	0.46474	0.0022444	0.0100366	OTTHUMG00000019557.2	LURAP1L	HGNC:31452
ENSG00000176532.4	19.5157	0.938065	0.450765	0.00225344	0.0100647	OTTHUMG00000128555.4	PRR15	HGNC:22310
ENSG00000230392.1	9.1917	1.3695	0.702846	0.00226749	0.0101176	OTTHUMG00000022271.1	AC004835.1
ENSG00000280254.1	47.5619	-0.651672	0.28365	0.0023099	0.0102892	OTTHUMG00000177930.1	AC233723.2
ENSG00000245651.3	12.5596	-1.32071	0.718985	0.00232037	0.0103233	OTTHUMG00000170485.11	AC083805.1
ENSG00000206549.13	3.94785	-2.50326	1.26492	0.00236397	0.0104714	OTTHUMG00000192149.1	AC109583.1
ENSG00000171954.13	74.5436	-0.598781	0.255929	0.00239829	0.0106003	OTTHUMG00000182451.3	CYP4F22	HGNC:26820
ENSG00000157856.12	6.05489	-2.71599	1.21896	0.00239989	0.0106048	OTTHUMG00000125531.7	DRC1	HGNC:24245
ENSG00000127530.4	7.08524	-2.45557	1.14704	0.00241128	0.0106448	OTTHUMG00000183411.3	OR7C1	HGNC:8373
ENSG00000175820.4	20.3541	0.950707	0.470974	0.0024306	0.0107146	OTTHUMG00000187287.2	CCDC168	HGNC:26851
ENSG00000162373.13	66.0228	-0.607901	0.26177	0.00243472	0.0107276	OTTHUMG00000008153.4	BEND5	HGNC:25668
ENSG00000183346.7	31.602	-0.972742	0.481175	0.00244165	0.010755	OTTHUMG00000018295.6	CABCOCO1	HGNC:28678
ENSG00000180801.14	84.1067	0.586421	0.249005	0.00244437	0.0107623	OTTHUMG00000161067.4	ARSJ	HGNC:26286
ENSG00000178093.14	60.9058	-0.585705	0.251427	0.00245666	0.0108138	OTTHUMG00000182146.5	TSSK6	HGNC:30410
ENSG00000225518.3	58.5565	-0.641546	0.282916	0.00251723	0.0110299	OTTHUMG00000041341.4	LINC01703	HGNC:52491
ENSG00000168306.13	13.2616	-1.29237	0.682399	0.00253363	0.0110898	OTTHUMG00000159154.4	ACOX2	HGNC:120
ENSG00000106546.14	205.748	0.713199	0.327842	0.00255169	0.0111595	OTTHUMG00000149967.5	AHR	HGNC:348
ENSG00000239626.1	8.78497	-1.99767	1.05445	0.00255745	0.0111821	OTTHUMG00000086817.1	RPSAP41	HGNC:36663
ENSG00000151790.9	5.85766	1.93508	1.0109	0.00256401	0.011201	OTTHUMG00000161838.6	TDO2	HGNC:11708
ENSG00000184313.20	13.6407	-2.24452	1.05042	0.00257652	0.0112407	OTTHUMG00000009890.7	MROH7	HGNC:24802
ENSG00000260083.2	91.0461	0.621637	0.271267	0.00257762	0.0112407	OTTHUMG00000176766.5	MIR762HG	HGNC:51386
ENSG00000262772.2	54.8406	0.608779	0.26305	0.00259543	0.0113048	OTTHUMG00000177465.3	LINC01977	HGNC:52804
ENSG00000206384.10	28.9179	-0.948105	0.471224	0.00260225	0.0113291	OTTHUMG00000159653.6	COL6A6	HGNC:27023
ENSG00000143847.15	603.837	-0.764102	0.36254	0.00260633	0.0113379	OTTHUMG00000042123.4	PPFIA4	HGNC:9248
ENSG00000182993.5	57.8741	-0.592161	0.256683	0.0026251	0.0114027	OTTHUMG00000167473.4	C12orf60	HGNC:28726
ENSG00000284693.1	31.7308	-0.782868	0.37626	0.00263644	0.0114452	OTTHUMG00000192293.1	LINC02606	HGNC:54047
ENSG00000272142.4	66.7066	0.661996	0.296841	0.00264201	0.011466	OTTHUMG00000195981.1	AL359643.3
ENSG00000220161.4	85.8497	-0.67876	0.30684	0.00264471	0.0114718	OTTHUMG00000179643.1	LINC02076	HGNC:52924
ENSG00000185345.22	62.7502	-0.660014	0.296871	0.00265582	0.0115048	OTTHUMG00000015970.10	PRKN	HGNC:8607
ENSG00000263740.2	14.8689	1.23759	0.685449	0.00265669	0.0115058		RN7SL4P	HGNC:10039
ENSG00000172794.20	23.7821	-0.804726	0.390637	0.00267831	0.0115775	OTTHUMG00000134282.5	RAB37	HGNC:30268
ENSG00000269486.2	63.42	0.725885	0.336458	0.00268307	0.0115926	OTTHUMG00000182717.2	ERVK9-11	HGNC:51160
ENSG00000261770.1	19.9776	1.11026	0.588041	0.00268918	0.0116162	OTTHUMG00000175751.2	AC006504.1
ENSG00000121270.15	42.276	-0.788264	0.38396	0.00270483	0.0116728	OTTHUMG00000133146.4	ABCC11	HGNC:14639
ENSG00000064787.13	11.1232	1.35475	0.755292	0.0027136	0.0117051	OTTHUMG00000032772.2	BCAS1	HGNC:974
ENSG00000179593.16	10.7663	-1.2251	0.661383	0.00272522	0.0117453	OTTHUMG00000108181.5	ALOX15B	HGNC:434
ENSG00000275964.1	20.4082	-0.999855	0.520148	0.00272444	0.0117453	OTTHUMG00000187050.1	AL355001.2
ENSG00000236051.7	77.1689	-0.654731	0.296512	0.00277457	0.0119203	OTTHUMG00000017104.3	MYCBP2-AS1	HGNC:41023
ENSG00000105472.13	164.254	-0.62058	0.27559	0.00281243	0.0120405	OTTHUMG00000182866.2	CLEC11A	HGNC:10576
ENSG00000012779.11	59.1464	-0.631696	0.283426	0.00281898	0.0120587	OTTHUMG00000018081.4	ALOX5	HGNC:435
ENSG00000119535.17	21.2036	2.96581	4.36296	0.00281935	0.0120587	OTTHUMG00000008010.7	CSF3R	HGNC:2439
ENSG00000260784.1	17.4041	1.05741	0.544556	0.00285867	0.0121899	OTTHUMG00000175648.1	AC026150.3
ENSG00000099840.13	45.6029	-0.702715	0.326949	0.00286855	0.0122234	OTTHUMG00000141290.5	IZUMO4	HGNC:26950
ENSG00000175161.13	40.7943	-0.662615	0.302669	0.00287544	0.012243	OTTHUMG00000158990.3	CADM2	HGNC:29849
ENSG00000070601.10	60.8081	0.5862	0.256384	0.00288058	0.0122604	OTTHUMG00000019927.4	FRMPD1	HGNC:29159
ENSG00000172780.16	116.838	-0.628569	0.282427	0.0028863	0.0122733	OTTHUMG00000137364.3	RAB43	HGNC:19983
ENSG00000176049.16	19.9284	1.01756	0.526523	0.00289162	0.0122874	OTTHUMG00000129731.4	JAKMIP2	HGNC:29067
ENSG00000229251.3	4.95621	-2.45962	1.22964	0.00290508	0.0123188	OTTHUMG00000154606.1	HNRNPA1P8	HGNC:39126
ENSG00000073464.12	80.7598	0.614437	0.271521	0.00293541	0.0124301	OTTHUMG00000021125.3	CLCN4	HGNC:2022
ENSG00000277938.1	19.6045	0.996078	0.522676	0.00293866	0.0124381	OTTHUMG00000186743.1	AL035252.4
ENSG00000279789.1	57.9016	0.625332	0.280895	0.00294487	0.0124615	OTTHUMG00000177146.1	AC120114.3
ENSG00000091536.19	53.1342	-0.621128	0.28081	0.00300229	0.0126575	OTTHUMG00000059390.14	MYO15A	HGNC:7594
ENSG00000158023.10	19.1228	1.02813	0.549995	0.00301366	0.0126938	OTTHUMG00000168948.2	WDR66	HGNC:28506
ENSG00000161328.11	51.6687	-0.703044	0.331192	0.00301366	0.0126938	OTTHUMG00000132003.2	LRRC56	HGNC:25430
ENSG00000184985.16	46.7293	-0.666297	0.305954	0.0030237	0.0127331	OTTHUMG00000159981.4	SORCS2	HGNC:16698
ENSG00000279833.1	55.5253	-0.729692	0.343274	0.00302439	0.0127331	OTTHUMG00000189207.1	AL031846.2
ENSG00000171817.17	56.3115	0.588377	0.258884	0.00303206	0.0127579	OTTHUMG00000182053.5	ZNF540	HGNC:25331
ENSG00000236914.4	10.982	1.36368	0.769645	0.00303237	0.0127579	OTTHUMG00000172374.4	LINC01852	HGNC:52668
ENSG00000138798.13	30.0085	0.781765	0.379297	0.00303929	0.0127811	OTTHUMG00000132044.8	EGF	HGNC:3229
ENSG00000231793.5	12.6216	-1.05673	0.582119	0.00310205	0.0129972	OTTHUMG00000154229.2	DOC2GP	HGNC:37962
ENSG00000248905.10	34.145	0.776785	0.378555	0.00310702	0.013015	OTTHUMG00000172201.7	FMN1	HGNC:3768
ENSG00000260081.2	27.4196	-0.876385	0.453281	0.00311516	0.0130431	OTTHUMG00000175536.3	AF274858.1
ENSG00000285304.1	78.9015	0.862734	0.445697	0.00312649	0.0130786	OTTHUMG00000192478.1	Z83844.3
ENSG00000104863.12	59.7712	-0.618515	0.279817	0.00312868	0.0130847	OTTHUMG00000134288.4	LIN7B	HGNC:17788
ENSG00000224985.1	70.6409	0.612425	0.275579	0.00314466	0.0131359	OTTHUMG00000033156.1	AL590714.1
ENSG00000213740.2	35.2424	-0.928865	0.483657	0.00315009	0.0131502	OTTHUMG00000021750.1	SERBP1P1	HGNC:32247
ENSG00000245025.3	48.2838	0.814711	0.407917	0.00315581	0.0131591	OTTHUMG00000163755.2	AC107959.1
ENSG00000248213.3	8.82966	1.44916	0.849574	0.00315583	0.0131591	OTTHUMG00000161208.2	CICP16	HGNC:38550
ENSG00000180525.12	36.6554	0.740177	0.35769	0.00318123	0.0132529	OTTHUMG00000017529.5	PRR26	HGNC:30724
ENSG00000281358.1	7.94456	-1.52468	0.944036	0.00322527	0.0134119	OTTHUMG00000189572.1	RASSF1-AS1	HGNC:49091
ENSG00000078081.8	56.4922	0.744718	0.365224	0.00324286	0.0134606	OTTHUMG00000158387.4	LAMP3	HGNC:14582
ENSG00000188162.11	55.6858	-0.637639	0.296405	0.0032491	0.0134804	OTTHUMG00000149905.6	OTOG	HGNC:8516
ENSG00000128340.15	43.9845	-0.706461	0.343146	0.00325258	0.0134887	OTTHUMG00000150540.3	RAC2	HGNC:9802
ENSG00000275549.1	23.5119	-0.892493	0.480513	0.00327729	0.013562	OTTHUMG00000187409.1	STPG3-AS1	HGNC:51176
ENSG00000122025.15	22.6458	0.798875	0.398394	0.00330387	0.0136518	OTTHUMG00000016646.4	FLT3	HGNC:3765
ENSG00000280010.1	12.4576	1.12891	0.636594	0.00333642	0.0137738	OTTHUMG00000173023.1	AP001350.2
ENSG00000112782.19	12.0568	1.15223	0.658132	0.00337073	0.0139029	OTTHUMG00000014775.11	CLIC5	HGNC:13517
ENSG00000255455.2	13.5942	-0.979803	0.549054	0.00345085	0.0141726	OTTHUMG00000165662.2	AP003486.1
ENSG00000091592.16	13.3275	1.09979	0.634365	0.0034654	0.0142228	OTTHUMG00000132419.9	NLRP1	HGNC:14374
ENSG00000123999.5	31.1406	-0.800738	0.414176	0.00350996	0.0143637	OTTHUMG00000059237.2	INHA	HGNC:6065
ENSG00000162989.5	34.7352	0.689487	0.332373	0.00350972	0.0143637	OTTHUMG00000131937.5	KCNJ3	HGNC:6264
ENSG00000268798.1	12.9582	1.10162	0.633211	0.00352024	0.0143897	OTTHUMG00000180070.4	AC027307.3
ENSG00000281332.1	102.036	0.593342	0.269386	0.00352579	0.0144092	OTTHUMG00000189740.1	LINC00997	HGNC:48952
ENSG00000152785.7	14.8702	0.927382	0.501686	0.00354535	0.0144729	OTTHUMG00000130292.2	BMP3	HGNC:1070
ENSG00000248235.6	8.59716	-1.5019	0.906692	0.00355018	0.0144861	OTTHUMG00000131729.12	AC037459.1
ENSG00000279821.1	52.0636	0.619905	0.285827	0.00360106	0.0146643	OTTHUMG00000163397.1	AC145098.2
ENSG00000229132.2	19.2398	-1.03348	0.576321	0.00360666	0.0146838	OTTHUMG00000021964.3	EIF4A1P10	HGNC:37930
ENSG00000280087.1	25.8612	-0.801034	0.420724	0.00366437	0.0149022	OTTHUMG00000180843.1	AC011481.3
ENSG00000125122.15	53.9867	-0.614337	0.288582	0.00369775	0.0150179	OTTHUMG00000154403.3	LRRC29	HGNC:13605
ENSG00000116254.18	107.461	-0.609269	0.283597	0.00371142	0.0150633	OTTHUMG00000000952.7	CHD5	HGNC:16816
ENSG00000239969.5	43.8497	-0.81081	0.435259	0.00371318	0.0150671	OTTHUMG00000157721.1	AC091390.5
ENSG00000234287.1	5.68804	-2.17406	1.29092	0.00378235	0.0152842	OTTHUMG00000156012.1	AC099560.2
ENSG00000213976.4	13.6545	1.26677	0.795701	0.0038643	0.0155662	OTTHUMG00000182844.1	AC010615.1
ENSG00000166816.14	58.5521	-0.647108	0.313692	0.00390165	0.0156856	OTTHUMG00000137605.4	LDHD	HGNC:19708
ENSG00000087589.16	8.32	1.44662	0.880226	0.00391899	0.0157518	OTTHUMG00000032788.3	CASS4	HGNC:15878
ENSG00000264920.2	66.8787	-0.610011	0.290498	0.00400664	0.0160406	OTTHUMG00000178293.2	AC018521.5
ENSG00000181392.17	15.7753	-1.01078	0.596336	0.00405052	0.0161808	OTTHUMG00000048135.8	SYNE4	HGNC:26703
ENSG00000265692.1	20.955	-0.918678	0.532162	0.00409555	0.0163428	OTTHUMG00000178661.1	LINC01970	HGNC:52796
ENSG00000120088.14	49.9126	-0.866199	0.4952	0.00411231	0.0163954	OTTHUMG00000178271.8	CRHR1	HGNC:2357
ENSG00000123338.13	22.0036	0.872378	0.484139	0.0041713	0.0165835	OTTHUMG00000169843.3	NCKAP1L	HGNC:4862
ENSG00000015285.11	30.689	-0.789977	0.429148	0.00417543	0.0165928	OTTHUMG00000034483.3	WAS	HGNC:12731
ENSG00000227487.4	29.7383	-0.708591	0.364093	0.00424304	0.0168175	OTTHUMG00000167663.2	NCAM1-AS1	HGNC:48675
ENSG00000285864.1	16.7116	-1.23563	0.897662	0.00428012	0.0169351	OTTHUMG00000192962.2	AP000593.4
ENSG00000186481.16	19.493	-1.0387	0.631877	0.00428478	0.0169462	OTTHUMG00000191817.1	ANKRD20A5P	HGNC:33833
ENSG00000240429.1	47.2844	0.639537	0.311919	0.0043082	0.0170241	OTTHUMG00000157336.1	LRRFIP1P1	HGNC:32937
ENSG00000273702.1	41.2441	-0.657667	0.328671	0.00433833	0.0171218	OTTHUMG00000186677.1	AC091271.1
ENSG00000218426.5	90.0915	-0.604061	0.289181	0.00434289	0.0171352	OTTHUMG00000015859.2	AL590867.2
ENSG00000270419.1	34.218	-0.718982	0.377063	0.00443622	0.017447	OTTHUMG00000175945.2	CAHM	HGNC:42860
ENSG00000273729.1	37.8476	-0.775594	0.425079	0.00444372	0.0174689	OTTHUMG00000187016.2	AC007686.3
ENSG00000119922.10	28.4521	0.834024	0.471837	0.00452934	0.0177217	OTTHUMG00000018707.3	IFIT2	HGNC:5409
ENSG00000104783.14	8.96206	-1.30601	0.933006	0.00454714	0.0177723	OTTHUMG00000182779.6	KCNN4	HGNC:6293
ENSG00000250474.2	15.4602	0.985009	0.582934	0.00455854	0.0178073	OTTHUMG00000154776.2	WBP1LP2	HGNC:43949
ENSG00000274292.1	60.3269	-0.713227	0.37824	0.00460374	0.0179604	OTTHUMG00000169079.2	AC084018.2
ENSG00000171596.7	54.5204	-0.600551	0.293174	0.00461261	0.0179897	OTTHUMG00000133225.3	NMUR1	HGNC:4518
ENSG00000213967.11	38.6651	0.64686	0.325283	0.00467399	0.0181902	OTTHUMG00000167681.6	ZNF726	HGNC:32462
ENSG00000142798.20	852.934	-0.649329	0.332905	0.00474177	0.0184148	OTTHUMG00000002674.11	HSPG2	HGNC:5273
ENSG00000251161.4	4.9819	1.86349	1.21789	0.00477315	0.0185091	OTTHUMG00000172510.3	AC020661.1
ENSG00000235217.6	15.3241	0.945344	0.587804	0.00483451	0.0187193	OTTHUMG00000032212.2	TSPY26P	HGNC:16256
ENSG00000269693.1	14.6746	-1.50895	1.23173	0.00494197	0.0190654	OTTHUMG00000182414.1	AC010422.6
ENSG00000235034.7	70.6783	-0.625176	0.317282	0.00507059	0.0194806	OTTHUMG00000154593.6	C19orf81	HGNC:40041
ENSG00000280106.1	14.9109	-0.925521	0.569068	0.00511658	0.0196161	OTTHUMG00000175770.1	AC008555.7
ENSG00000272892.1	22.426	-0.887721	0.547249	0.00513007	0.0196561	OTTHUMG00000186404.1	AL133551.1
ENSG00000143226.14	14.3945	1.09606	0.767101	0.00515517	0.0197267	OTTHUMG00000034469.9	FCGR2A	HGNC:3616
ENSG00000197044.11	30.2871	-0.759979	0.424652	0.00516153	0.019747	OTTHUMG00000154449.5	ZNF441	HGNC:20875
ENSG00000115138.11	25.6286	-0.850231	0.507828	0.0051667	0.0197585	OTTHUMG00000094764.6	POMC	HGNC:9201
ENSG00000230882.1	40.4737	-0.616496	0.314439	0.00520784	0.019895	OTTHUMG00000156621.2	AC005077.4
ENSG00000273261.1	8.39656	-1.34697	1.01733	0.00522527	0.0199407	OTTHUMG00000186091.1	AC092953.2
ENSG00000205710.4	18.2714	0.941278	0.586015	0.00525357	0.0200153	OTTHUMG00000164838.2	C17orf107	HGNC:37238
ENSG00000270277.1	19.3319	-0.863312	0.537221	0.00525318	0.0200153	OTTHUMG00000180305.1	AC009948.2
ENSG00000272638.1	56.4182	-0.590979	0.292591	0.00528898	0.0201235	OTTHUMG00000186204.1	AC006027.1
ENSG00000237423.3	20.655	0.93593	0.572351	0.00535756	0.0203182	OTTHUMG00000032678.5	LINC01522	HGNC:51224
ENSG00000141086.18	30.9189	0.687623	0.370416	0.0054632	0.0206369	OTTHUMG00000137552.7	CTRL	HGNC:2524
ENSG00000160471.13	16.8994	-0.835715	0.510663	0.00547442	0.0206671	OTTHUMG00000180774.7	COX6B2	HGNC:24380
ENSG00000224546.2	6.57349	-1.64911	1.24966	0.00548897	0.0207177	OTTHUMG00000020290.2	EIF4BP3	HGNC:37936
ENSG00000270195.2	55.6097	-0.623072	0.32216	0.00549135	0.0207224	OTTHUMG00000185171.2	AC016773.2
ENSG00000177191.2	28.0215	-0.758973	0.439073	0.00555301	0.0209292	OTTHUMG00000182749.1	B3GNT8	HGNC:24139
ENSG00000251023.1	6.90453	-1.35109	1.07947	0.00561495	0.0211365	OTTHUMG00000162817.1	AC114980.1
ENSG00000253821.2	4.59598	2.38231	1.4597	0.00564203	0.0212209	OTTHUMG00000164272.2	AC090796.1
ENSG00000253958.2	6.75926	-1.37199	1.11888	0.0056635	0.0212885	OTTHUMG00000163674.2	CLDN23	HGNC:17591
ENSG00000170345.10	79.8225	1.02963	0.78746	0.00566991	0.0213082	OTTHUMG00000171774.4	FOS	HGNC:3796
ENSG00000235508.3	6.01457	-2.1102	1.37631	0.00567469	0.0213218	OTTHUMG00000032603.1	RPS2P7	HGNC:15838
ENSG00000162746.14	27.6583	-0.74743	0.430335	0.00568033	0.0213266	OTTHUMG00000133629.1	FCRLB	HGNC:26431
ENSG00000234546.4	12.8478	-0.9054	0.594928	0.00569062	0.0213509	OTTHUMG00000001764.8	LNCTAM34A	HGNC:52548
ENSG00000234825.3	8.21651	-1.41992	1.00419	0.00570686	0.0213987	OTTHUMG00000022637.4	XRCC6P2	HGNC:45184
ENSG00000113248.6	16.7105	-0.898519	0.575609	0.00572194	0.0214376	OTTHUMG00000129609.6	PCDHB15	HGNC:8686
ENSG00000279443.1	34.0278	0.716895	0.403286	0.00575206	0.0215152	OTTHUMG00000175791.1	AL513497.1
ENSG00000164078.13	31.3238	-0.668488	0.367077	0.00587376	0.0218853	OTTHUMG00000156709.7	MST1R	HGNC:7381
ENSG00000266573.6	14.4276	-2.36375	1.57081	0.00592792	0.0220427	OTTHUMG00000179506.2	AC018697.1
ENSG00000227615.1	25.8488	-0.864282	0.551937	0.00602891	0.0223494	OTTHUMG00000158412.1	AP001324.1
ENSG00000276900.1	25.1114	-0.766743	0.460484	0.00607616	0.0224881	OTTHUMG00000187205.1	AC023157.3
ENSG00000142512.15	22.0787	-0.770885	0.460998	0.00610362	0.0225623	OTTHUMG00000165521.5	SIGLEC10	HGNC:15620
ENSG00000212664.5	12.077	-1.16972	0.879512	0.00619549	0.0228372	OTTHUMG00000157993.1	AC064799.1
ENSG00000243422.2	35.4261	-0.631378	0.340117	0.00620909	0.0228781	OTTHUMG00000157322.2	RPL23AP49	HGNC:35689
ENSG00000287576.1	34.6321	-0.641983	0.349702	0.00621632	0.0228935	OTTHUMG00000195553.1	AC067930.8
ENSG00000130270.16	65.4721	-0.597882	0.313898	0.00622196	0.0229049	OTTHUMG00000166189.12	ATP8B3	HGNC:13535
ENSG00000226054.2	8.75389	1.07002	0.799993	0.00622264	0.0229049	OTTHUMG00000086608.1	MEMO1P1	HGNC:23274
ENSG00000263327.6	38.5046	-0.625068	0.335587	0.00623278	0.022933	OTTHUMG00000160321.2	TAPT1-AS1	HGNC:26832
ENSG00000184163.3	16.5863	-0.904315	0.636789	0.00628433	0.0230912	OTTHUMG00000001412.6	C1QTNF12	HGNC:32308
ENSG00000272807.1	15.346	-0.879155	0.593186	0.00628905	0.0230947	OTTHUMG00000186312.1	AC007038.1
ENSG00000163131.11	8.71521	1.35371	4.94702	0.00630378	0.023129	OTTHUMG00000035010.3	CTSS	HGNC:2545
ENSG00000272887.1	51.9021	0.788235	0.500517	0.0063297	0.0232195	OTTHUMG00000172439.2	CSPG4P5	HGNC:29403
ENSG00000251095.7	14.6506	0.872642	0.587473	0.00672012	0.0243341	OTTHUMG00000161187.5	AC093866.1
ENSG00000284874.1	225.795	-0.807082	0.55604	0.00687997	0.0248191	OTTHUMG00000192396.1	AC000093.1
ENSG00000204767.4	28.2138	0.743731	0.462042	0.00692455	0.0249409	OTTHUMG00000163083.2	INSYN2B	HGNC:37271
ENSG00000240859.3	12.5972	-0.999103	0.80466	0.0069372	0.0249756	OTTHUMG00000151398.4	AC093627.4
ENSG00000263934.4	43.7793	0.58923	0.315746	0.00694099	0.0249805	OTTHUMG00000178445.2	SNORD3A	HGNC:33189
ENSG00000151632.17	22.1883	1.2568	0.865059	0.00698901	0.0250891	OTTHUMG00000017584.4	AKR1C2	HGNC:385
ENSG00000277449.1	45.3386	0.636631	0.362007	0.00699389	0.0250967	OTTHUMG00000186944.1	CEBPB-AS1	HGNC:51226
ENSG00000169064.12	31.4203	-0.678223	0.40201	0.00713922	0.025553	OTTHUMG00000133560.6	ZBBX	HGNC:26245
ENSG00000258561.2	12.0323	-0.999023	0.791752	0.00715666	0.0256053	OTTHUMG00000171191.2	AL359232.1
ENSG00000280161.1	31.3629	-0.68954	0.407601	0.0071702	0.0256437	OTTHUMG00000162253.1	AC022413.2
ENSG00000280351.2	32.9658	0.650697	0.370554	0.00720404	0.0257497	OTTHUMG00000177659.1	AC127496.7
ENSG00000204282.4	21.6587	0.784899	0.512967	0.00727308	0.0259153	OTTHUMG00000177654.1	TNRC6C-AS1	HGNC:44360
ENSG00000286538.1	7.4656	1.22225	1.01745	0.00726442	0.0259153	OTTHUMG00000195690.1	AC008798.2
ENSG00000100767.16	15.1616	0.802071	0.533998	0.00730132	0.0260058	OTTHUMG00000171366.5	PAPLN	HGNC:19262
ENSG00000197162.10	37.2628	0.636974	0.363358	0.00730356	0.0260087	OTTHUMG00000176950.4	ZNF785	HGNC:26496
ENSG00000245261.1	7.1962	1.3127	2.09206	0.00733945	0.0261263	OTTHUMG00000159928.1	AL133375.1
ENSG00000196337.11	18.1948	-0.851558	0.625823	0.00736393	0.0261981	OTTHUMG00000183339.1	CGB7	HGNC:16451
ENSG00000229536.3	19.1115	-0.796212	0.538267	0.00737683	0.0262338	OTTHUMG00000153489.6	LINC02572	HGNC:53634
ENSG00000286810.1	18.3276	-0.912338	0.70715	0.0074275	0.0263832	OTTHUMG00000194814.1	AL513128.3
ENSG00000074706.13	18.4417	0.786175	0.514124	0.00750239	0.0266182	OTTHUMG00000015872.5	IPCEF1	HGNC:21204
ENSG00000287967.1	15.9048	0.91949	0.739086	0.00768014	0.0271539	OTTHUMG00000194315.1	AC004882.4
ENSG00000287569.1	39.3218	0.595626	0.329641	0.00768567	0.0271577	OTTHUMG00000194074.1	AL078587.2
ENSG00000233297.4	45.833	-0.613886	0.346564	0.0077285	0.0272721	OTTHUMG00000157719.2	RASA4DP	HGNC:44226
ENSG00000251596.1	9.56801	1.08144	0.93479	0.00777979	0.0274478	OTTHUMG00000161127.1	HADHAP1	HGNC:4802
ENSG00000285600.1	30.0755	-0.671699	0.405803	0.00780273	0.0275181	OTTHUMG00000192815.1	AC023593.1
ENSG00000147206.17	9.65785	0.954414	0.841361	0.00790105	0.0278112	OTTHUMG00000022088.3	NXF3	HGNC:8073
ENSG00000141338.14	36.0947	0.612019	0.348314	0.00792916	0.027894	OTTHUMG00000180192.5	ABCA8	HGNC:38
ENSG00000203722.8	22.6282	0.745028	0.485307	0.00798162	0.0280411	OTTHUMG00000015802.3	RAET1G	HGNC:16795
ENSG00000171885.17	22.7903	0.69562	0.432451	0.00798514	0.0280478	OTTHUMG00000131955.9	AQP4	HGNC:637
ENSG00000228791.8	13.4541	-0.881106	0.681691	0.00800134	0.0280831	OTTHUMG00000155683.7	THRB-AS1	HGNC:44515
ENSG00000107147.13	12.1145	-0.870157	0.705683	0.00801282	0.0281126	OTTHUMG00000020917.12	KCNT1	HGNC:18865
ENSG00000167995.16	132.806	0.586426	0.330796	0.00815667	0.0285296	OTTHUMG00000167469.4	BEST1	HGNC:12703
ENSG00000129910.8	26.6569	-0.796195	0.594987	0.00821629	0.0286887	OTTHUMG00000138045.4	CDH15	HGNC:1754
ENSG00000114757.19	14.5924	0.84983	0.634847	0.00830136	0.0289415	OTTHUMG00000157363.7	PEX5L	HGNC:30024
ENSG00000154316.16	26.6754	-0.711831	0.461082	0.00838696	0.0291759	OTTHUMG00000165365.6	TDH	HGNC:15547
ENSG00000272384.1	22.6849	0.697986	0.451039	0.00847722	0.0294199	OTTHUMG00000185333.1	AC016405.3
ENSG00000241288.8	58.3087	-0.668233	0.416062	0.00848731	0.0294437	OTTHUMG00000159585.7	LINC02614	HGNC:54072
ENSG00000086717.18	22.6635	0.730187	0.481067	0.00852224	0.0295228	OTTHUMG00000021219.9	PPEF1	HGNC:9243
ENSG00000139988.10	14.8926	0.77275	0.53686	0.00868025	0.0299935	OTTHUMG00000170032.2	RDH12	HGNC:19977
ENSG00000267302.5	36.6213	-0.599402	0.352313	0.00867868	0.0299935	OTTHUMG00000179978.1	RNFT1-DT	HGNC:51346
ENSG00000271776.1	33.7588	-0.632695	0.384104	0.00868896	0.0300179	OTTHUMG00000185376.1	AL445209.1
ENSG00000261308.2	25.9717	-0.719081	0.493358	0.0087214	0.0300901	OTTHUMG00000175693.2	FIGNL2	HGNC:13287
ENSG00000212127.6	40.4636	-0.585062	0.335723	0.00874598	0.0301579	OTTHUMG00000162720.5	TAS2R14	HGNC:14920
ENSG00000173762.8	11.4112	-0.83802	0.675804	0.00884317	0.0304241	OTTHUMG00000178662.3	CD7	HGNC:1695
ENSG00000232811.1	15.217	0.898465	0.832119	0.00893951	0.0307151	OTTHUMG00000034494.1	AL360270.1
ENSG00000283294.1	9.56333	-1.0562	1.27114	0.0089592	0.0307712	OTTHUMG00000157172.5	AP005212.4
ENSG00000149564.12	37.025	0.590628	0.340828	0.00899395	0.0308673	OTTHUMG00000151986.3	ESAM	HGNC:17474
ENSG00000258659.6	30.4443	0.635451	0.389859	0.00906503	0.0310645	OTTHUMG00000066892.3	TRIM34	HGNC:10063
ENSG00000152049.6	28.5942	0.735764	0.502957	0.00923859	0.0315882	OTTHUMG00000133161.4	KCNE4	HGNC:6244
ENSG00000177409.12	21.0163	0.794927	0.614813	0.00934896	0.0318666	OTTHUMG00000155807.4	SAMD9L	HGNC:1349
ENSG00000104112.9	32.5841	-0.641051	0.411342	0.00940508	0.0320137	OTTHUMG00000131748.5	SCG3	HGNC:13707
ENSG00000274272.1	70.0056	0.611337	0.373444	0.00942356	0.0320587	OTTHUMG00000187473.1	AC069281.2
ENSG00000231233.1	13.79	-0.800905	0.705921	0.00952314	0.0323613	OTTHUMG00000019005.1	CFAP58-DT	HGNC:45243
ENSG00000239945.1	29.163	0.672298	0.444896	0.00955533	0.0324406	OTTHUMG00000001097.2	AL627309.3
ENSG00000250222.2	26.9971	-0.695572	0.480308	0.0095543	0.0324406	OTTHUMG00000163004.3	AC008443.5
ENSG00000122862.5	15.2267	0.877007	1.01575	0.00957936	0.0325087	OTTHUMG00000018369.2	SRGN	HGNC:9361
ENSG00000137747.16	27.1264	-0.643256	0.40945	0.00961016	0.0325783	OTTHUMG00000166992.3	TMPRSS13	HGNC:29808
ENSG00000156509.14	24.3033	-0.735509	0.539488	0.0096933	0.0327871	OTTHUMG00000164803.3	FBXO43	HGNC:28521
ENSG00000228510.2	6.07619	1.21125	1.37284	0.00970768	0.0328297	OTTHUMG00000020744.2	AL359091.2
ENSG00000273374.1	36.273	-0.674848	0.463624	0.00979036	0.0330542	OTTHUMG00000185856.1	AC069222.1
ENSG00000185988.15	34.4441	-0.637796	0.409927	0.00984262	0.0331877	OTTHUMG00000180073.9	PLK5	HGNC:27001
ENSG00000279491.1	12.9505	-0.779332	0.651615	0.00998143	0.0336124	OTTHUMG00000187461.1	AP003733.3
ENSG00000222018.2	14.4509	-0.723586	3.45173	0.0100918	0.0339152	OTTHUMG00000154291.3	FAM243A	HGNC:39602
ENSG00000141506.13	37.4216	-0.617102	0.397677	0.0101688	0.0341239	OTTHUMG00000108197.5	PIK3R5	HGNC:30035
ENSG00000229719.5	6.42738	1.05284	1.33826	0.0102624	0.0344	OTTHUMG00000066834.2	MIR194-2HG	HGNC:51946
ENSG00000253553.7	11.4735	-0.869041	0.986878	0.0103697	0.0346706	OTTHUMG00000163770.5	AC090578.1
ENSG00000258940.2	14.9129	-0.799907	0.704388	0.0103867	0.0347179	OTTHUMG00000170769.2	AL132639.2
ENSG00000260941.1	10.6822	0.810583	0.723825	0.0106447	0.0353894	OTTHUMG00000176048.1	LINC00622	HGNC:44251
ENSG00000135436.8	27.4087	-0.633469	0.433062	0.0107305	0.0356421	OTTHUMG00000167427.3	FAM186B	HGNC:25296
ENSG00000231105.2	9.97758	-0.856427	1.02044	0.0107435	0.0356743	OTTHUMG00000002777.2	ECE1-AS1	HGNC:40203
ENSG00000285533.2	19.2534	-0.68366	0.496691	0.0107505	0.0356793	OTTHUMG00000193144.2	RELA-DT	HGNC:54185
ENSG00000287839.1	5.80326	1.13855	1.47784	0.0107958	0.035789	OTTHUMG00000194515.1	AL353807.5
ENSG00000102924.12	23.2999	-0.61503	0.406695	0.0108873	0.0360515	OTTHUMG00000133148.5	CBLN1	HGNC:1543
ENSG00000239713.9	19.9325	-0.696008	0.527631	0.0109339	0.036173	OTTHUMG00000151081.5	APOBEC3G	HGNC:17357
ENSG00000287553.1	17.8	-0.701539	0.552115	0.0111051	0.0366135	OTTHUMG00000193874.1	AC090617.10
ENSG00000082684.16	32.016	-0.64282	0.461306	0.0111342	0.0366696	OTTHUMG00000140392.5	SEMA5B	HGNC:10737
ENSG00000240889.1	33.238	-0.590851	0.374178	0.0111329	0.0366696	OTTHUMG00000157407.1	NDUFB2-AS1	HGNC:40396
ENSG00000286846.1	12.2644	0.818892	0.889294	0.011139	0.0366792	OTTHUMG00000194705.1	Z93943.1
ENSG00000173535.14	13.4989	0.839825	0.854242	0.0114477	0.0375333	OTTHUMG00000097844.4	TNFRSF10C	HGNC:11906
ENSG00000175147.13	29.1207	-0.673598	0.531917	0.0115111	0.0376938	OTTHUMG00000002043.8	TMEM51-AS1	HGNC:26301
ENSG00000160318.6	7.62228	-0.838826	1.30165	0.0115512	0.0377979	OTTHUMG00000182901.1	CLDND2	HGNC:28511
ENSG00000101194.18	32.1151	-0.612123	0.417737	0.011629	0.0380124	OTTHUMG00000032951.9	SLC17A9	HGNC:16192
ENSG00000118160.14	41.5948	-0.600312	0.391325	0.0116313	0.0380124	OTTHUMG00000183529.5	SLC8A2	HGNC:11069
ENSG00000271335.6	32.5081	-0.630611	0.433283	0.011789	0.0384315	OTTHUMG00000185120.2	AL117336.2
ENSG00000145934.16	13.7753	0.752117	0.696475	0.0118575	0.0386203	OTTHUMG00000162928.4	TENM2	HGNC:29943
ENSG00000172771.12	18.8701	-0.668862	0.527605	0.01192	0.0387825	OTTHUMG00000159464.3	EFCAB12	HGNC:28061
ENSG00000156096.14	13.6183	0.772768	0.992273	0.0119356	0.0388195	OTTHUMG00000058891.6	UGT2B4	HGNC:12553
ENSG00000234215.3	12.5422	-0.767093	0.94756	0.0120435	0.0390939	OTTHUMG00000156644.4	CT66	HGNC:54198
ENSG00000155761.14	33.5491	-0.625626	0.43354	0.0120572	0.0391313	OTTHUMG00000012198.5	SPAG17	HGNC:26620
ENSG00000137440.5	12.7277	0.811779	0.812931	0.0121981	0.0395044	OTTHUMG00000097745.2	FGFBP1	HGNC:19695
ENSG00000139318.8	23.599	0.640728	0.4569	0.0122827	0.039666	OTTHUMG00000169912.5	DUSP6	HGNC:3072
ENSG00000249971.1	21.6209	-0.709382	0.656162	0.0126208	0.0404786	OTTHUMG00000163471.1	AC104116.1
ENSG00000251056.1	29.5151	-0.621872	0.444651	0.0126535	0.0405623	OTTHUMG00000160600.1	ANKRD20A17P	HGNC:43608
ENSG00000130176.8	18.0953	-0.667921	0.53588	0.0127163	0.0407206	OTTHUMG00000182033.3	CNN1	HGNC:2155
ENSG00000203650.9	6.88625	-0.616663	1.54423	0.0127906	0.0409012	OTTHUMG00000022260.7	LINC01285	HGNC:50344
ENSG00000272140.2	31.5888	-0.641657	0.522927	0.0128119	0.0409336	OTTHUMG00000185468.2	AC022400.6
ENSG00000088002.11	30.9148	-0.608191	0.433535	0.0129661	0.0413395	OTTHUMG00000183314.1	SULT2B1	HGNC:11459
ENSG00000028137.19	20.5301	0.684716	0.587154	0.0130599	0.041566	OTTHUMG00000001829.2	TNFRSF1B	HGNC:11917
ENSG00000213080.3	15.9771	-0.674215	0.568526	0.0131051	0.0416809	OTTHUMG00000028599.1	AL354714.2
ENSG00000285815.1	20.9488	0.604159	1.42319	0.0131512	0.0417838	OTTHUMG00000192633.1	WRB-SH3BGR
ENSG00000198400.11	20.3356	-0.640449	0.507981	0.0132437	0.0419972	OTTHUMG00000041304.3	NTRK1	HGNC:8031
ENSG00000100060.18	12.6147	0.718937	0.653688	0.0132955	0.0421177	OTTHUMG00000150560.4	MFNG	HGNC:7038
ENSG00000283761.1	45.114	0.596194	0.428651	0.0133975	0.042382	OTTHUMG00000191982.2	AC118553.2
ENSG00000182511.12	19.0279	-0.659013	0.571591	0.013466	0.0425546	OTTHUMG00000044456.8	FES	HGNC:3657
ENSG00000249679.2	12.9272	-0.724455	0.731377	0.013489	0.0426199	OTTHUMG00000160454.2	AC106897.2
ENSG00000235568.7	10.3121	0.703996	1.08377	0.0136096	0.0428973	OTTHUMG00000150923.2	NFAM1	HGNC:29872
ENSG00000196139.14	11.2929	1.04789	1.46937	0.013768	0.0433144	OTTHUMG00000017585.7	AKR1C3	HGNC:386
ENSG00000255458.7	21.9288	-0.645869	0.521681	0.0141781	0.0443753	OTTHUMG00000166290.7	AC108471.3
ENSG00000260369.2	15.7745	-0.663732	0.610691	0.014285	0.0446485	OTTHUMG00000176094.2	AC120024.1
ENSG00000230325.1	13.7509	0.721837	0.878564	0.0144938	0.0452005	OTTHUMG00000041413.1	AL359921.1
ENSG00000278934.1	9.88887	-0.661383	0.995185	0.0145042	0.0452177	OTTHUMG00000182479.1	AC117489.1
ENSG00000114854.8	13.7516	-0.666303	0.75837	0.0145095	0.0452265	OTTHUMG00000158572.3	TNNC1	HGNC:11943
ENSG00000236993.2	26.2249	-0.606217	0.457236	0.014527	0.0452545	OTTHUMG00000018260.2	GAPDHP21	HGNC:37773
ENSG00000169885.10	14.0446	-0.667782	0.700452	0.0145437	0.0452733	OTTHUMG00000000943.3	CALML6	HGNC:24193
ENSG00000213881.3	22.6516	-0.68698	0.722665	0.0146012	0.0454117	OTTHUMG00000164349.1	NPM1P6	HGNC:7926
ENSG00000234009.1	12.7379	-0.701574	0.857564	0.0146464	0.0455133	OTTHUMG00000150746.1	RPL5P34	HGNC:36463
ENSG00000117983.17	14.2094	-0.649158	0.733662	0.0152728	0.0472431	OTTHUMG00000166494.4	MUC5B	HGNC:7516
ENSG00000287731.1	17.7736	-0.63767	0.549601	0.0153193	0.0473468	OTTHUMG00000195566.1	AL035603.1
ENSG00000273711.2	27.2757	-0.630241	0.584838	0.0153442	0.0474077	OTTHUMG00000186965.2	AC005520.7
ENSG00000273038.2	17.7914	0.66711	0.667387	0.015692	0.0482375	OTTHUMG00000186205.2	AL365203.2
ENSG00000227855.3	14.071	-0.637247	0.788399	0.0159045	0.0487187	OTTHUMG00000152749.4	DPY19L2P3	HGNC:22367
ENSG00000280273.2	14.7937	0.630754	0.593336	0.0164175	0.04998	OTTHUMG00000192013.1	AF131216.4

## Sheet: DCP1abKO_WT
Supplementary File 1c. Differentially Expressed Genes Identified by Comparing Transcriptomes between DCP1a/b Knockout and Wild Type Samples
geneID	baseMean	log2FoldChange	lfcSE	pvalue	padj	havana_gene	gene_name	hgnc_id
ENSG00000128965.13	613.734	3.28612	0.147074	1.00359e-111	1.83375e-107	OTTHUMG00000130208.11	CHAC1	HGNC:28680
ENSG00000177108.5	398.925	-2.58438	0.12648	5.7276e-94	5.23273e-90	OTTHUMG00000171575.3	ZDHHC22	HGNC:20106
ENSG00000048740.18	464.316	2.57101	0.129724	1.51455e-88	9.2246e-85	OTTHUMG00000017668.8	CELF2	HGNC:2550
ENSG00000175197.12	407.829	2.56972	0.13582	4.76936e-81	2.17864e-77	OTTHUMG00000170046.4	DDIT3	HGNC:2726
ENSG00000171246.6	1737.36	-1.70721	0.0917185	1.46429e-78	5.3511e-75	OTTHUMG00000177607.2	NPTX1	HGNC:7952
ENSG00000176046.8	534.067	3.70313	0.20134	8.67659e-77	2.64231e-73	OTTHUMG00000131764.3	NUPR1	HGNC:29990
ENSG00000162772.17	2879.77	2.37518	0.129185	1.04982e-76	2.74034e-73	OTTHUMG00000036747.9	ATF3	HGNC:785
ENSG00000101160.14	282.362	-6.43224	0.360375	5.03472e-71	1.14993e-67	OTTHUMG00000032858.3	CTSZ	HGNC:2547
ENSG00000104267.10	7630.65	-1.71378	0.098979	2.41319e-68	4.89932e-65	OTTHUMG00000164944.3	CA2	HGNC:1373
ENSG00000174460.4	1390.39	-2.18387	0.126729	8.8108e-68	1.60991e-64	OTTHUMG00000022261.2	ZCCHC12	HGNC:27273
ENSG00000182871.16	2655.15	-1.94534	0.115226	3.55254e-65	5.9011e-62	OTTHUMG00000090407.6	COL18A1	HGNC:2195
ENSG00000036448.10	503.45	-2.08165	0.128442	2.67382e-60	4.07133e-57	OTTHUMG00000129175.8	MYOM2	HGNC:7614
ENSG00000178538.10	1263.55	-1.54008	0.0979921	8.70178e-57	1.22307e-53	OTTHUMG00000165325.2	CA8	HGNC:1382
ENSG00000148798.11	1384.15	-1.16543	0.0742014	1.93026e-56	2.51927e-53	OTTHUMG00000018986.2	INA	HGNC:6057
ENSG00000130766.5	4190	1.68355	0.110001	4.84582e-54	5.90285e-51	OTTHUMG00000003532.2	SESN2	HGNC:20746
ENSG00000168209.5	4089.29	1.70486	0.111512	6.2901e-54	7.18329e-51	OTTHUMG00000183961.3	DDIT4	HGNC:24944
ENSG00000155966.14	215.034	3.24997	0.214162	3.36572e-53	3.61755e-50	OTTHUMG00000022613.6	AFF2	HGNC:3776
ENSG00000113739.10	5963.08	1.82222	0.120485	6.59457e-53	6.3419e-50	OTTHUMG00000130542.4	STC2	HGNC:11374
ENSG00000204103.4	483.243	-2.21958	0.146734	6.42254e-53	6.3419e-50	OTTHUMG00000033052.3	MAFB	HGNC:6408
ENSG00000108679.13	4032.82	-1.663	0.110095	1.00254e-52	9.15923e-50	OTTHUMG00000177572.8	LGALS3BP	HGNC:6564
ENSG00000188157.15	2244.81	-1.69013	0.112008	1.21911e-52	1.06074e-49	OTTHUMG00000040778.7	AGRN	HGNC:329
ENSG00000198075.10	305.919	1.97878	0.131074	1.34794e-52	1.11953e-49	OTTHUMG00000130958.4	SULT1C4	HGNC:11457
ENSG00000102393.11	4070.38	-1.4005	0.0929231	1.74771e-52	1.38844e-49	OTTHUMG00000022026.6	GLA	HGNC:4296
ENSG00000013374.16	4159.75	1.26336	0.0838698	2.44595e-52	1.86219e-49	OTTHUMG00000157365.5	NUB1	HGNC:17623
ENSG00000253898.1	623.531	-3.75785	0.254315	4.93967e-50	3.61031e-47	OTTHUMG00000164609.1	LINC01419	HGNC:50712
ENSG00000134871.19	3189.13	-2.26503	0.155471	2.67391e-49	1.87914e-46	OTTHUMG00000017344.9	COL4A2	HGNC:2203
ENSG00000187498.16	1359.38	-2.23438	0.153543	3.26639e-49	2.2105e-46	OTTHUMG00000017342.11	COL4A1	HGNC:2202
ENSG00000185818.8	1174.61	-1.72661	0.118814	5.52159e-49	3.60323e-46	OTTHUMG00000121151.6	NAT8L	HGNC:26742
ENSG00000166446.15	135.067	3.62343	0.254384	2.78756e-47	1.75636e-44	OTTHUMG00000177004.4	CDYL2	HGNC:23030
ENSG00000065154.12	4210.58	-1.02369	0.0720575	6.07038e-47	3.69727e-44	OTTHUMG00000019213.2	OAT	HGNC:8091
ENSG00000154359.13	550.78	1.45258	0.10269	1.66621e-46	9.82094e-44	OTTHUMG00000165475.3	LONRF1	HGNC:26302
ENSG00000265972.6	1268.52	1.9078	0.135302	2.47475e-46	1.41308e-43	OTTHUMG00000013755.7	TXNIP	HGNC:16952
ENSG00000153879.9	3499.25	1.72542	0.123455	4.42016e-46	2.44743e-43	OTTHUMG00000180469.5	CEBPG	HGNC:1837
ENSG00000146950.13	106.043	3.51227	0.252224	3.44162e-45	1.84957e-42	OTTHUMG00000021121.3	SHROOM2	HGNC:630
ENSG00000158856.18	400.911	1.8875	0.137646	5.8013e-44	3.02861e-41	OTTHUMG00000097087.7	DMTN	HGNC:3382
ENSG00000283674.3	488.912	1.59912	0.118699	1.70875e-42	8.67288e-40	OTTHUMG00000191723.3	AC068587.4
ENSG00000131080.15	226.849	-3.19468	0.237614	3.33528e-42	1.64709e-39	OTTHUMG00000021736.3	EDA2R	HGNC:17756
ENSG00000011376.12	2485.64	-0.879054	0.0661198	3.20266e-41	1.53997e-38	OTTHUMG00000133177.13	LARS2	HGNC:17095
ENSG00000111981.5	246.138	2.86866	0.218575	1.34423e-40	6.29787e-38	OTTHUMG00000015810.3	ULBP1	HGNC:14893
ENSG00000150687.12	907.846	1.33821	0.10271	7.05974e-40	3.22489e-37	OTTHUMG00000167226.4	PRSS23	HGNC:14370
ENSG00000221914.11	2548.12	1.32403	0.10171	8.85988e-40	3.94848e-37	OTTHUMG00000163850.17	PPP2R2A	HGNC:9304
ENSG00000105429.13	2842.48	-1.49679	0.115444	1.34533e-39	5.85281e-37	OTTHUMG00000150342.3	MEGF8	HGNC:3233
ENSG00000168495.13	1824.31	0.986825	0.0765496	6.79095e-39	2.88568e-36	OTTHUMG00000163778.5	POLR3D	HGNC:1080
ENSG00000068078.18	2045.49	-0.965333	0.0751287	8.06872e-39	3.35072e-36	OTTHUMG00000121148.7	FGFR3	HGNC:3690
ENSG00000128165.9	301.482	2.66411	0.209521	2.91202e-38	1.18241e-35	OTTHUMG00000150202.2	ADM2	HGNC:28898
ENSG00000047644.18	64.2366	4.46947	0.351623	1.02897e-37	4.08725e-35	OTTHUMG00000021123.1	WWC3	HGNC:29237
ENSG00000171492.14	1322.16	1.51155	0.119792	1.21532e-37	4.72476e-35	OTTHUMG00000010583.5	LRRC8D	HGNC:16992
ENSG00000106479.11	556.378	1.23882	0.0989138	5.56726e-37	2.11927e-34	OTTHUMG00000158093.4	ZNF862	HGNC:34519
ENSG00000237289.9	1693.26	-1.6868	0.136479	2.14589e-36	8.00197e-34	OTTHUMG00000059900.7	CKMT1B	HGNC:1995
ENSG00000065150.21	12003.1	-0.870248	0.0705003	2.68153e-36	9.79937e-34	OTTHUMG00000017244.9	IPO5	HGNC:6402
ENSG00000135899.17	150.282	2.07912	0.168422	4.30791e-36	1.54341e-33	OTTHUMG00000133204.6	SP110	HGNC:5401
ENSG00000090776.6	857.258	-1.1852	0.0964447	8.94267e-36	3.08303e-33	OTTHUMG00000021751.2	EFNB1	HGNC:3226
ENSG00000183741.12	4479.98	-1.09288	0.0888524	8.8164e-36	3.08303e-33	OTTHUMG00000150456.3	CBX6	HGNC:1556
ENSG00000162734.12	2891.05	1.1771	0.0961567	1.68992e-35	5.71818e-33	OTTHUMG00000031605.1	PEA15	HGNC:8822
ENSG00000087074.8	1765.25	1.67653	0.137264	1.77936e-35	5.91135e-33	OTTHUMG00000183330.3	PPP1R15A	HGNC:14375
ENSG00000102195.10	850.534	-2.32779	0.193885	1.70097e-34	5.55002e-32	OTTHUMG00000024166.2	GPR50	HGNC:4506
ENSG00000164741.15	1178.09	1.46474	0.121705	1.77666e-34	5.69529e-32	OTTHUMG00000090825.12	DLC1	HGNC:2897
ENSG00000170689.10	8517.37	1.00206	0.0832241	2.51262e-34	7.91563e-32	OTTHUMG00000159907.4	HOXB9	HGNC:5120
ENSG00000101856.10	9597.1	-0.886014	0.0735853	2.67936e-34	8.29786e-32	OTTHUMG00000022268.2	PGRMC1	HGNC:16090
ENSG00000237836.6	97.2286	-4.5117	0.373044	4.18443e-34	1.2743e-31	OTTHUMG00000021220.2	PHKA2-AS1	HGNC:44110
ENSG00000119801.13	546.143	1.28297	0.10749	7.08157e-34	2.12122e-31	OTTHUMG00000097839.5	YPEL5	HGNC:18329
ENSG00000080546.13	914.925	-1.10262	0.0927149	1.24684e-33	3.61623e-31	OTTHUMG00000015338.6	SESN1	HGNC:21595
ENSG00000167972.14	1232.14	-1.43561	0.120697	1.24291e-33	3.61623e-31	OTTHUMG00000128845.3	ABCA3	HGNC:33
ENSG00000168078.10	740.453	1.26622	0.106809	1.8129e-33	5.17584e-31	OTTHUMG00000102113.6	PBK	HGNC:18282
ENSG00000107562.16	215.35	1.77484	0.150031	2.06491e-33	5.80462e-31	OTTHUMG00000018054.2	CXCL12	HGNC:10672
ENSG00000112972.15	2072.12	-1.06795	0.0901554	2.49785e-33	6.81204e-31	OTTHUMG00000162231.3	HMGCS1	HGNC:5007
ENSG00000140044.13	484.336	1.73216	0.146693	2.48381e-33	6.81204e-31	OTTHUMG00000171869.4	JDP2	HGNC:17546
ENSG00000116991.10	1962.12	1.49717	0.127203	3.7811e-33	1.016e-30	OTTHUMG00000037820.1	SIPA1L2	HGNC:23800
ENSG00000115380.20	302.117	1.73337	0.147621	5.71464e-33	1.5133e-30	OTTHUMG00000129343.7	EFEMP1	HGNC:3218
ENSG00000104611.12	272.85	1.60992	0.13722	6.50469e-33	1.69791e-30	OTTHUMG00000097005.4	SH2D4A	HGNC:26102
ENSG00000240230.6	822.333	1.10284	0.0941446	9.81827e-33	2.52675e-30	OTTHUMG00000151476.2	COX19	HGNC:28074
ENSG00000204387.14	1130.53	1.71514	0.146773	1.03153e-32	2.6178e-30	OTTHUMG00000031175.4	SNHG32	HGNC:19078
ENSG00000125247.15	634.967	-1.37371	0.117789	1.67755e-32	4.19894e-30	OTTHUMG00000017289.6	TMTC4	HGNC:25904
ENSG00000101255.11	1480	2.22458	0.19135	1.87592e-32	4.63201e-30	OTTHUMG00000031627.6	TRIB3	HGNC:16228
ENSG00000159840.16	3107.34	1.06522	0.0913371	2.39878e-32	5.84408e-30	OTTHUMG00000023822.11	ZYX	HGNC:13200
ENSG00000164733.21	3101.03	1.02853	0.0884852	3.06158e-32	7.36068e-30	OTTHUMG00000090799.10	CTSB	HGNC:2527
ENSG00000079337.16	218.145	2.50663	0.216777	3.29838e-32	7.827e-30	OTTHUMG00000133667.8	RAPGEF3	HGNC:16629
ENSG00000073464.12	80.7598	2.78904	0.240861	4.48415e-32	1.05044e-29	OTTHUMG00000021125.3	CLCN4	HGNC:2022
ENSG00000147324.11	889.47	1.304	0.112889	9.046e-32	2.09226e-29	OTTHUMG00000163676.3	MFHAS1	HGNC:16982
ENSG00000186523.14	386.441	1.33631	0.116085	9.18198e-32	2.09716e-29	OTTHUMG00000165298.5	FAM86B1	HGNC:28268
ENSG00000159363.18	1725.89	-1.54945	0.135401	1.80697e-31	4.07618e-29	OTTHUMG00000002293.5	ATP13A2	HGNC:30213
ENSG00000104728.16	762.202	-1.35759	0.118634	1.90692e-31	4.24918e-29	OTTHUMG00000163626.3	ARHGEF10	HGNC:14103
ENSG00000129946.10	299.813	1.57675	0.137841	2.12289e-31	4.67342e-29	OTTHUMG00000180545.10	SHC2	HGNC:29869
ENSG00000248498.4	165.535	2.94387	0.258071	2.42454e-31	5.27395e-29	OTTHUMG00000165535.2	ASNSP1	HGNC:754
ENSG00000196517.12	807.81	2.25227	0.197873	3.07716e-31	6.61481e-29	OTTHUMG00000008294.4	SLC6A9	HGNC:11056
ENSG00000147676.14	57.6977	3.83583	0.336225	5.99474e-31	1.27367e-28	OTTHUMG00000164973.5	MAL2	HGNC:13634
ENSG00000176595.4	369.302	-1.41207	0.124669	7.56781e-31	1.58941e-28	OTTHUMG00000163629.2	KBTBD11	HGNC:29104
ENSG00000168918.14	124.802	-2.41181	0.214023	1.0002e-30	2.07678e-28	OTTHUMG00000133688.7	INPP5D	HGNC:6079
ENSG00000180900.20	4186.49	-1.07633	0.0953405	1.35941e-30	2.79092e-28	OTTHUMG00000165154.7	SCRIB	HGNC:30377
ENSG00000147416.11	1730.91	0.792761	0.0702555	2.43991e-30	4.95355e-28	OTTHUMG00000131073.3	ATP6V1B2	HGNC:854
ENSG00000106236.4	793.268	-1.35379	0.120749	2.83163e-30	5.68566e-28	OTTHUMG00000154369.2	NPTX2	HGNC:7953
ENSG00000139219.19	992.698	-1.31403	0.117282	2.99685e-30	5.95201e-28	OTTHUMG00000149896.7	COL2A1	HGNC:2200
ENSG00000180447.7	912.847	-1.17193	0.104926	5.22034e-30	1.02566e-27	OTTHUMG00000020141.2	GAS1	HGNC:4165
ENSG00000196453.8	1772.15	1.02456	0.0919354	8.36597e-30	1.6262e-27	OTTHUMG00000158967.2	ZNF777	HGNC:22213
ENSG00000134901.13	417.465	-1.19056	0.107481	1.48343e-29	2.85319e-27	OTTHUMG00000017307.4	POGLUT2	HGNC:19350
ENSG00000277586.2	5961.09	-1.05032	0.0948062	2.28807e-29	4.35496e-27	OTTHUMG00000134284.9	NEFL	HGNC:7739
ENSG00000078674.17	4539.52	1.08155	0.0983237	4.811e-29	9.06254e-27	OTTHUMG00000163699.7	PCM1	HGNC:8727
ENSG00000129422.14	863.583	1.21196	0.111129	7.82798e-29	1.45952e-26	OTTHUMG00000163756.5	MTUS1	HGNC:29789
ENSG00000205476.9	1705.77	-1.24913	0.115217	1.73526e-28	3.2027e-26	OTTHUMG00000171506.5	CCDC85C	HGNC:35459
ENSG00000120915.14	504.089	1.17113	0.108267	2.22552e-28	4.06647e-26	OTTHUMG00000102115.7	EPHX2	HGNC:3402
ENSG00000165030.4	432.22	1.35265	0.125209	2.77919e-28	5.02787e-26	OTTHUMG00000020209.3	NFIL3	HGNC:7787
ENSG00000167642.13	686.851	-1.35949	0.126134	3.37202e-28	6.04054e-26	OTTHUMG00000181891.4	SPINT2	HGNC:11247
ENSG00000163430.12	3044.7	0.863517	0.0798638	4.12523e-28	7.31808e-26	OTTHUMG00000159440.3	FSTL1	HGNC:3972
ENSG00000169710.9	18970.9	-1.15175	0.106866	4.69209e-28	8.24364e-26	OTTHUMG00000178527.6	FASN	HGNC:3594
ENSG00000173812.11	12848.2	1.21213	0.112962	5.73809e-28	9.98537e-26	OTTHUMG00000133492.6	EIF1	HGNC:3249
ENSG00000134884.15	2827.35	-1.23183	0.11534	1.07295e-27	1.84952e-25	OTTHUMG00000017321.4	ARGLU1	HGNC:25482
ENSG00000133872.14	2320.29	0.722248	0.0672127	1.08636e-27	1.85514e-25	OTTHUMG00000133397.7	SARAF	HGNC:28789
ENSG00000245532.9	7311.05	1.05217	0.0984073	1.12802e-27	1.90844e-25	OTTHUMG00000166321.8	NEAT1	HGNC:30815
ENSG00000147419.18	1809.5	0.980195	0.09178	1.45196e-27	2.43396e-25	OTTHUMG00000132173.5	CCDC25	HGNC:25591
ENSG00000135269.18	1925.4	1.40712	0.132459	1.8048e-27	2.99794e-25	OTTHUMG00000023092.10	TES	HGNC:14620
ENSG00000165280.16	8905.68	-0.641736	0.0599457	2.02223e-27	3.32885e-25	OTTHUMG00000019855.5	VCP	HGNC:12666
ENSG00000099194.6	22365.5	-0.752836	0.0705262	2.21026e-27	3.60588e-25	OTTHUMG00000018906.3	SCD	HGNC:10571
ENSG00000251136.9	279.759	1.75018	0.165572	2.71406e-27	4.38861e-25	OTTHUMG00000163788.5	AF117829.1
ENSG00000184916.9	1810.67	-1.12547	0.106288	3.08452e-27	4.94389e-25	OTTHUMG00000140172.3	JAG2	HGNC:6189
ENSG00000134900.12	1554.19	-1.05565	0.0997903	4.17969e-27	6.64098e-25	OTTHUMG00000017305.5	TPP2	HGNC:12016
ENSG00000151388.11	45.9577	4.11498	0.388371	4.73966e-27	7.46577e-25	OTTHUMG00000162088.5	ADAMTS12	HGNC:14605
ENSG00000100219.16	5109.62	1.45858	0.138615	5.13833e-27	8.02458e-25	OTTHUMG00000151094.3	XBP1	HGNC:12801
ENSG00000125304.10	2607.77	-0.801781	0.0761224	8.95366e-27	1.38645e-24	OTTHUMG00000017272.5	TM9SF2	HGNC:11865
ENSG00000104824.17	8937.34	-0.735806	0.0700222	1.38391e-26	2.12494e-24	OTTHUMG00000182612.3	HNRNPL	HGNC:5045
ENSG00000029534.20	348.404	-1.74757	0.168138	1.66702e-26	2.53831e-24	OTTHUMG00000150281.8	ANK1	HGNC:492
ENSG00000143878.10	4312.24	-0.775658	0.0737853	1.86529e-26	2.81674e-24	OTTHUMG00000090755.4	RHOB	HGNC:668
ENSG00000168477.19	81.8175	2.42442	0.233552	2.42856e-26	3.63727e-24	OTTHUMG00000031088.12	TNXB	HGNC:11976
ENSG00000021826.17	1134.02	-1.07566	0.103867	3.92553e-26	5.83149e-24	OTTHUMG00000132994.16	CPS1	HGNC:2323
ENSG00000175040.6	292.772	-1.47951	0.143457	4.49828e-26	6.62844e-24	OTTHUMG00000159351.3	CHST2	HGNC:1970
ENSG00000165572.8	1010.41	-0.816004	0.078639	4.96768e-26	7.26155e-24	OTTHUMG00000016786.2	KBTBD6	HGNC:25340
ENSG00000177469.13	1624.23	-1.52626	0.147614	5.24923e-26	7.61222e-24	OTTHUMG00000180137.2	CAVIN1	HGNC:9688
ENSG00000168036.18	7233.53	-0.789555	0.0762612	5.54801e-26	7.98215e-24	OTTHUMG00000131393.16	CTNNB1	HGNC:2514
ENSG00000128283.7	5048.07	1.36332	0.133211	1.15395e-25	1.6345e-23	OTTHUMG00000150591.6	CDC42EP1	HGNC:17014
ENSG00000147852.16	390.465	1.47457	0.144174	1.14651e-25	1.6345e-23	OTTHUMG00000019447.5	VLDLR	HGNC:12698
ENSG00000132846.6	1276.26	1.27591	0.124698	1.20942e-25	1.69989e-23	OTTHUMG00000102131.6	ZBED3	HGNC:20711
ENSG00000100241.21	4173.27	-0.971485	0.094757	1.24692e-25	1.73921e-23	OTTHUMG00000150204.4	SBF1	HGNC:10542
ENSG00000136436.14	3457.41	0.865958	0.0845197	1.64315e-25	2.27452e-23	OTTHUMG00000160505.6	CALCOCO2	HGNC:29912
ENSG00000219481.10	2447.3	0.951144	0.0930309	1.82356e-25	2.50527e-23	OTTHUMG00000002487.10	NBPF1	HGNC:26088
ENSG00000168924.15	3635.86	-0.631453	0.0618219	3.08439e-25	4.20583e-23	OTTHUMG00000121149.5	LETM1	HGNC:6556
ENSG00000104723.21	1475.33	0.995412	0.0980832	3.72724e-25	5.04476e-23	OTTHUMG00000094803.4	TUSC3	HGNC:30242
ENSG00000147316.13	750.371	1.19941	0.118454	3.88085e-25	5.21404e-23	OTTHUMG00000163618.6	MCPH1	HGNC:6954
ENSG00000108018.15	187.052	1.91013	0.191431	1.24009e-24	1.65394e-22	OTTHUMG00000019018.5	SORCS1	HGNC:16697
ENSG00000164050.13	514.65	-1.47575	0.147964	1.40126e-24	1.85535e-22	OTTHUMG00000133527.6	PLXNB1	HGNC:9103
ENSG00000074181.9	1207.02	-1.42703	0.143351	1.82571e-24	2.39995e-22	OTTHUMG00000183217.4	NOTCH3	HGNC:7883
ENSG00000134014.17	1410.64	0.969043	0.0970511	2.02084e-24	2.63749e-22	OTTHUMG00000102124.4	ELP3	HGNC:20696
ENSG00000228526.7	301.449	-1.39791	0.140806	2.37539e-24	3.07823e-22	OTTHUMG00000001762.6	MIR34AHG	HGNC:51913
ENSG00000137700.18	1734.32	-0.922412	0.0927452	3.04894e-24	3.92325e-22	OTTHUMG00000166352.5	SLC37A4	HGNC:4061
ENSG00000182372.10	318.793	-1.29049	0.130271	3.2302e-24	4.12743e-22	OTTHUMG00000090343.10	CLN8	HGNC:2079
ENSG00000204815.10	184.327	1.7838	0.180684	3.76127e-24	4.77264e-22	OTTHUMG00000175837.2	TTC25	HGNC:25280
ENSG00000104691.15	434.917	0.997057	0.100712	4.74184e-24	5.97538e-22	OTTHUMG00000163851.11	UBXN8	HGNC:30307
ENSG00000170266.16	1726.57	-0.771838	0.0781086	7.88914e-24	9.87331e-22	OTTHUMG00000155781.8	GLB1	HGNC:4298
ENSG00000170271.11	287.536	1.32348	0.134993	8.601e-24	1.0691e-21	OTTHUMG00000164141.3	FAXDC2	HGNC:1334
ENSG00000115902.11	1115.72	1.65803	0.169845	1.01203e-23	1.24945e-21	OTTHUMG00000129537.4	SLC1A4	HGNC:10942
ENSG00000106004.5	2116.78	0.983173	0.100218	1.05678e-23	1.29594e-21	OTTHUMG00000023214.4	HOXA5	HGNC:5106
ENSG00000223572.9	682.498	-1.50535	0.154321	1.24718e-23	1.51923e-21	OTTHUMG00000059898.16	CKMT1A	HGNC:31736
ENSG00000156521.14	1334.8	-1.11508	0.114628	2.12618e-23	2.57282e-21	OTTHUMG00000018397.2	TYSND1	HGNC:28531
ENSG00000173575.22	4045.46	1.05817	0.108837	2.16255e-23	2.59961e-21	OTTHUMG00000185958.14	CHD2	HGNC:1917
ENSG00000135365.15	1186.19	0.838558	0.0858746	2.26563e-23	2.70573e-21	OTTHUMG00000167038.2	PHF21A	HGNC:24156
ENSG00000104613.12	1723.99	0.717608	0.0738004	4.31759e-23	5.12279e-21	OTTHUMG00000131065.5	INTS10	HGNC:25548
ENSG00000173530.6	194.284	-1.55344	0.16168	5.16372e-23	6.08719e-21	OTTHUMG00000097845.2	TNFRSF10D	HGNC:11907
ENSG00000102893.16	1788.28	-0.673637	0.0696144	5.80147e-23	6.79516e-21	OTTHUMG00000133102.6	PHKB	HGNC:8927
ENSG00000125931.11	690.824	-1.54427	0.161131	6.66769e-23	7.76001e-21	OTTHUMG00000021812.5	CITED1	HGNC:1986
ENSG00000118640.11	175.102	-1.84765	0.192736	7.18903e-23	8.31379e-21	OTTHUMG00000130180.5	VAMP8	HGNC:12647
ENSG00000247134.7	65.867	2.6995	0.28198	7.86626e-23	9.03977e-21	OTTHUMG00000163952.14	AC090204.1
ENSG00000132205.11	539.966	-1.34383	0.140648	9.0769e-23	1.03658e-20	OTTHUMG00000128525.3	EMILIN2	HGNC:19881
ENSG00000031698.13	9977.67	0.965875	0.100543	9.93621e-23	1.12767e-20	OTTHUMG00000011726.4	SARS1	HGNC:10537
ENSG00000153395.10	2145.7	-0.869079	0.0906508	1.15928e-22	1.30756e-20	OTTHUMG00000131017.5	LPCAT1	HGNC:25718
ENSG00000228775.8	87.1032	2.65067	0.278616	1.27827e-22	1.43292e-20	OTTHUMG00000157538.4	WEE2-AS1	HGNC:48669
ENSG00000106948.16	479.362	2.31551	0.244406	1.66829e-22	1.84745e-20	OTTHUMG00000020538.2	AKNA	HGNC:24108
ENSG00000126803.9	125.061	-1.91289	0.201704	1.66624e-22	1.84745e-20	OTTHUMG00000141311.4	HSPA2	HGNC:5235
ENSG00000099399.6	111.086	-2.4767	0.262374	2.34824e-22	2.58476e-20	OTTHUMG00000021319.2	MAGEB2	HGNC:6809
ENSG00000154277.13	4786.45	-1.09274	0.115116	2.40065e-22	2.62663e-20	OTTHUMG00000099377.17	UCHL1	HGNC:12513
ENSG00000185963.14	1958.35	-1.02042	0.107824	3.06377e-22	3.33221e-20	OTTHUMG00000021036.2	BICD2	HGNC:17208
ENSG00000134897.14	689.608	-0.933359	0.0984995	3.25037e-22	3.51424e-20	OTTHUMG00000017309.10	BIVM	HGNC:16034
ENSG00000162733.19	5201.43	1.68184	0.178785	3.7178e-22	3.99598e-20	OTTHUMG00000034423.9	DDR2	HGNC:2731
ENSG00000179673.5	112.619	-2.4268	0.258831	4.32893e-22	4.62563e-20	OTTHUMG00000178187.2	RPRML	HGNC:32422
ENSG00000006757.12	108.311	-5.14464	0.533966	4.85781e-22	5.16058e-20	OTTHUMG00000021103.3	PNPLA4	HGNC:24887
ENSG00000168268.11	5498.54	-0.897511	0.0947936	5.09727e-22	5.38366e-20	OTTHUMG00000158626.23	NT5DC2	HGNC:25717
ENSG00000132507.18	9594.46	-0.782435	0.0828436	5.41034e-22	5.68147e-20	OTTHUMG00000102197.8	EIF5A	HGNC:3300
ENSG00000115457.10	1432.98	-1.18507	0.126366	5.76422e-22	6.01851e-20	OTTHUMG00000155341.3	IGFBP2	HGNC:5471
ENSG00000224032.7	718.857	0.877401	0.0932034	6.14132e-22	6.3758e-20	OTTHUMG00000128803.4	EPB41L4A-AS1	HGNC:30749
ENSG00000130203.10	314.385	-1.72611	0.184707	6.25109e-22	6.4531e-20	OTTHUMG00000128901.5	APOE	HGNC:613
ENSG00000115267.8	170.811	1.83555	0.196693	7.40298e-22	7.59928e-20	OTTHUMG00000132055.7	IFIH1	HGNC:18873
ENSG00000052841.15	2246.67	0.704638	0.074666	7.70712e-22	7.86729e-20	OTTHUMG00000166398.6	TTC17	HGNC:25596
ENSG00000167995.16	132.806	2.7756	0.298309	7.93696e-22	8.0569e-20	OTTHUMG00000167469.4	BEST1	HGNC:12703
ENSG00000188573.8	108.996	1.98824	0.213989	1.1233e-21	1.13398e-19	OTTHUMG00000157012.5	FBLL1	HGNC:35458
ENSG00000229544.9	141.641	-2.19078	0.236576	1.34403e-21	1.34197e-19	OTTHUMG00000185174.10	NKX1-2	HGNC:31652
ENSG00000175198.17	494.103	-1.07272	0.115813	1.83409e-21	1.82133e-19	OTTHUMG00000017284.13	PCCA	HGNC:8653
ENSG00000197217.13	1467.47	0.812357	0.0877242	2.81368e-21	2.779e-19	OTTHUMG00000097852.5	ENTPD4	HGNC:14573
ENSG00000133466.14	662.715	1.16027	0.126019	3.05742e-21	3.0035e-19	OTTHUMG00000150538.2	C1QTNF6	HGNC:14343
ENSG00000130726.12	12597.5	-0.677051	0.072951	3.49316e-21	3.40046e-19	OTTHUMG00000183546.3	TRIM28	HGNC:16384
ENSG00000134874.17	2902.12	-0.750336	0.0810949	3.49872e-21	3.40046e-19	OTTHUMG00000017224.7	DZIP1	HGNC:20908
ENSG00000172936.14	120.245	-2.46571	0.269771	4.37273e-21	4.22743e-19	OTTHUMG00000131083.11	MYD88	HGNC:7562
ENSG00000233922.3	233.826	-1.59491	0.174735	4.56931e-21	4.39423e-19	OTTHUMG00000090408.4	LINC01694	HGNC:52481
ENSG00000003400.15	167.756	1.37568	0.150269	4.64788e-21	4.44639e-19	OTTHUMG00000132818.5	CASP10	HGNC:1500
ENSG00000120913.23	395.998	1.37983	0.150842	4.77067e-21	4.54009e-19	OTTHUMG00000164270.6	PDLIM2	HGNC:13992
ENSG00000081181.8	803.961	0.945566	0.103078	5.3722e-21	5.05984e-19	OTTHUMG00000171807.3	ARG2	HGNC:664
ENSG00000275591.5	75.3413	2.52136	0.276757	5.37021e-21	5.05984e-19	OTTHUMG00000153652.5	XKR5	HGNC:20782
ENSG00000004660.15	608.275	-0.938284	0.102304	5.41231e-21	5.06686e-19	OTTHUMG00000090725.3	CAMKK1	HGNC:1469
ENSG00000177889.10	2993.49	-0.749847	0.0813132	5.43512e-21	5.06686e-19	OTTHUMG00000170156.5	UBE2N	HGNC:12492
ENSG00000171388.12	179.537	-1.60951	0.176589	5.799e-21	5.37864e-19	OTTHUMG00000022371.3	APLN	HGNC:16665
ENSG00000104356.11	923.009	-0.902736	0.0987712	7.34755e-21	6.78053e-19	OTTHUMG00000164635.3	POP1	HGNC:30129
ENSG00000104765.16	1347.94	0.728913	0.0794136	7.95631e-21	7.30542e-19	OTTHUMG00000099433.4	BNIP3L	HGNC:1085
ENSG00000169439.12	1883.29	-0.776899	0.0848728	8.30377e-21	7.58633e-19	OTTHUMG00000164689.6	SDC2	HGNC:10659
ENSG00000159403.18	299.466	1.17739	0.129617	9.32867e-21	8.48027e-19	OTTHUMG00000168149.10	C1R	HGNC:1246
ENSG00000204498.11	997.528	1.04787	0.115069	9.65378e-21	8.73237e-19	OTTHUMG00000031038.5	NFKBIL1	HGNC:7800
ENSG00000134899.21	1380.04	-0.982909	0.108016	9.80094e-21	8.82181e-19	OTTHUMG00000017310.9	ERCC5	HGNC:3437
ENSG00000168280.17	1017.35	-1.11797	0.122281	1.31979e-20	1.18211e-18	OTTHUMG00000153779.7	KIF5C	HGNC:6325
ENSG00000259956.2	3593.18	-0.607912	0.066465	1.37607e-20	1.22652e-18	OTTHUMG00000156896.2	RBM15B	HGNC:24303
ENSG00000125257.16	987.312	-0.860931	0.0947958	1.4184e-20	1.25811e-18	OTTHUMG00000017216.11	ABCC4	HGNC:55
ENSG00000185924.7	113.322	-2.22334	0.247331	1.79032e-20	1.58033e-18	OTTHUMG00000180184.3	RTN4RL1	HGNC:21329
ENSG00000119715.15	133.724	-1.87153	0.208241	1.80697e-20	1.58735e-18	OTTHUMG00000160457.7	ESRRB	HGNC:3473
ENSG00000065911.12	7360.58	1.04643	0.116054	2.04018e-20	1.78364e-18	OTTHUMG00000129814.5	MTHFD2	HGNC:7434
ENSG00000114738.11	2097.06	-0.69634	0.0768166	2.28756e-20	1.9904e-18	OTTHUMG00000156850.13	MAPKAPK3	HGNC:6888
ENSG00000181666.18	660.631	0.914194	0.101532	2.66746e-20	2.30995e-18	OTTHUMG00000181937.8	ZNF875	HGNC:4928
ENSG00000137203.13	1354.48	0.715361	0.07929	3.05797e-20	2.63563e-18	OTTHUMG00000014235.8	TFAP2A	HGNC:11742
ENSG00000249992.2	192.569	-1.94473	0.218441	3.09957e-20	2.64651e-18	OTTHUMG00000160317.3	TMEM158	HGNC:30293
ENSG00000250722.6	250.23	1.47625	0.165208	3.09921e-20	2.64651e-18	OTTHUMG00000162140.5	SELENOP	HGNC:10751
ENSG00000123689.6	367.93	1.51482	0.170587	4.77042e-20	4.05419e-18	OTTHUMG00000036479.2	G0S2	HGNC:30229
ENSG00000104626.15	520.601	1.1634	0.130673	4.87764e-20	4.12612e-18	OTTHUMG00000129328.7	ERI1	HGNC:23994
ENSG00000100814.18	1631.95	0.900674	0.100845	5.40913e-20	4.55464e-18	OTTHUMG00000029509.6	CCNB1IP1	HGNC:19437
ENSG00000048342.16	718.345	0.875223	0.0981884	6.11394e-20	5.12449e-18	OTTHUMG00000160255.16	CC2D2A	HGNC:29253
ENSG00000122783.16	1369.01	0.734202	0.0824157	8.48284e-20	7.07756e-18	OTTHUMG00000155447.5	CYREN	HGNC:22432
ENSG00000102003.10	283.138	-1.25785	0.142366	9.94051e-20	8.25605e-18	OTTHUMG00000034557.6	SYP	HGNC:11506
ENSG00000111344.11	62.4765	-2.67849	0.304794	1.02518e-19	8.47603e-18	OTTHUMG00000169705.2	RASAL1	HGNC:9873
ENSG00000164610.9	486.188	1.58202	0.18009	1.09395e-19	9.00391e-18	OTTHUMG00000152988.3	RP9	HGNC:10288
ENSG00000105750.15	51.8964	2.47307	0.281858	1.2397e-19	1.00731e-17	OTTHUMG00000182747.6	ZNF85	HGNC:13160
ENSG00000146963.18	6803.66	0.755218	0.0851951	1.23831e-19	1.00731e-17	OTTHUMG00000185163.3	LUC7L2	HGNC:21608
ENSG00000174607.11	606.656	-0.96678	0.109562	1.2404e-19	1.00731e-17	OTTHUMG00000132915.5	UGT8	HGNC:12555
ENSG00000091317.8	1188.03	-0.932031	0.105633	1.28734e-19	1.04081e-17	OTTHUMG00000130747.3	CMTM6	HGNC:19177
ENSG00000105732.13	651.847	-0.798054	0.0902545	1.34526e-19	1.08284e-17	OTTHUMG00000182751.5	ZNF574	HGNC:26166
ENSG00000164853.9	86.4184	-2.80172	0.320986	1.52409e-19	1.22141e-17	OTTHUMG00000152022.3	UNCX	HGNC:33194
ENSG00000203930.12	1077.39	0.952535	0.108443	1.77942e-19	1.4198e-17	OTTHUMG00000022548.18	LINC00632	HGNC:27865
ENSG00000167232.14	110.602	1.92798	0.221029	1.85887e-19	1.47675e-17	OTTHUMG00000183268.4	ZNF91	HGNC:13166
ENSG00000112146.16	1391.77	-0.70978	0.0804526	1.97837e-19	1.56488e-17	OTTHUMG00000014869.9	FBXO9	HGNC:13588
ENSG00000188613.7	114.888	-1.92921	0.221434	2.02292e-19	1.59322e-17	OTTHUMG00000019141.3	NANOS1	HGNC:23044
ENSG00000188993.3	58.7153	2.7745	0.318149	2.04376e-19	1.60273e-17	OTTHUMG00000160623.1	LRRC66	HGNC:34299
ENSG00000176407.18	1230.15	0.953323	0.10894	2.45022e-19	1.91326e-17	OTTHUMG00000153004.14	KCMF1	HGNC:20589
ENSG00000138617.15	458.417	0.931799	0.106417	2.47554e-19	1.91665e-17	OTTHUMG00000133138.6	PARP16	HGNC:26040
ENSG00000185565.12	95.7592	1.97209	0.226604	2.46542e-19	1.91665e-17	OTTHUMG00000159308.7	LSAMP	HGNC:6705
ENSG00000178445.9	1140.45	-0.804214	0.0916673	2.50339e-19	1.93004e-17	OTTHUMG00000019524.4	GLDC	HGNC:4313
ENSG00000132361.17	5511.31	-0.603509	0.0684312	2.57477e-19	1.97673e-17	OTTHUMG00000177575.10	CLUH	HGNC:29094
ENSG00000152642.10	1016.83	-0.771075	0.0879839	2.93288e-19	2.24224e-17	OTTHUMG00000155846.3	GPD1L	HGNC:28956
ENSG00000147454.14	1306.72	0.813825	0.0931149	3.38392e-19	2.57629e-17	OTTHUMG00000163865.2	SLC25A37	HGNC:29786
ENSG00000114650.20	2940.97	-0.662607	0.0756685	3.90334e-19	2.95941e-17	OTTHUMG00000125539.16	SCAP	HGNC:30634
ENSG00000120910.14	292.883	1.16521	0.134377	3.96329e-19	2.99245e-17	OTTHUMG00000163802.4	PPP3CC	HGNC:9316
ENSG00000198791.12	2377.61	0.818179	0.0939308	4.28981e-19	3.22565e-17	OTTHUMG00000096971.5	CNOT7	HGNC:14101
ENSG00000172216.6	1005.49	1.56156	0.181361	4.93384e-19	3.69472e-17	OTTHUMG00000032715.2	CEBPB	HGNC:1834
ENSG00000051108.15	1708.04	1.07163	0.124261	5.54447e-19	4.13504e-17	OTTHUMG00000133276.10	HERPUD1	HGNC:13744
ENSG00000112715.23	2345.47	0.906029	0.104727	6.49482e-19	4.82412e-17	OTTHUMG00000014745.14	VEGFA	HGNC:12680
ENSG00000155380.11	6106.18	-0.630367	0.0725424	7.73126e-19	5.71926e-17	OTTHUMG00000012129.2	SLC16A1	HGNC:10922
ENSG00000120075.5	622.888	1.00393	0.116794	8.72761e-19	6.43028e-17	OTTHUMG00000159913.2	HOXB5	HGNC:5116
ENSG00000104695.13	751.96	0.861244	0.0999654	9.34629e-19	6.85475e-17	OTTHUMG00000163949.4	PPP2CB	HGNC:9300
ENSG00000136859.10	44.7234	-4.04597	0.467373	9.37876e-19	6.85475e-17	OTTHUMG00000020695.2	ANGPTL2	HGNC:490
ENSG00000147255.19	41.4498	2.78543	0.326151	1.12428e-18	8.18442e-17	OTTHUMG00000022406.4	IGSF1	HGNC:5948
ENSG00000164294.14	2063.52	0.822954	0.0957466	1.1509e-18	8.34491e-17	OTTHUMG00000162601.3	GPX8	HGNC:33100
ENSG00000182325.11	764.871	-0.956261	0.111666	1.21596e-18	8.78182e-17	OTTHUMG00000165169.2	FBXL6	HGNC:13603
ENSG00000110619.17	2984.23	0.843885	0.0983194	1.29685e-18	9.32915e-17	OTTHUMG00000010927.9	CARS1	HGNC:1493
ENSG00000168077.14	732.216	0.913426	0.106578	1.43565e-18	1.02871e-16	OTTHUMG00000163898.5	SCARA3	HGNC:19000
ENSG00000196793.13	357.481	1.0439	0.122408	1.56301e-18	1.1156e-16	OTTHUMG00000018033.2	ZNF239	HGNC:13031
ENSG00000179409.11	2226.47	-0.743967	0.0868927	1.78324e-18	1.26783e-16	OTTHUMG00000177495.5	GEMIN4	HGNC:15717
ENSG00000136270.14	2394.67	-0.757899	0.0885536	1.79966e-18	1.27455e-16	OTTHUMG00000129247.8	TBRG4	HGNC:17443
ENSG00000164620.9	315.34	-1.18732	0.140244	2.15224e-18	1.51837e-16	OTTHUMG00000129612.5	RELL2	HGNC:26902
ENSG00000115884.11	691.228	-1.10087	0.129965	2.22432e-18	1.56318e-16	OTTHUMG00000090751.5	SDC1	HGNC:10658
ENSG00000102595.20	723.977	-0.939855	0.110662	2.36885e-18	1.65838e-16	OTTHUMG00000017230.5	UGGT2	HGNC:15664
ENSG00000164707.15	568.004	0.955577	0.112692	2.58704e-18	1.80422e-16	OTTHUMG00000155539.3	SLC13A4	HGNC:15827
ENSG00000130054.4	550.763	-0.836312	0.0985473	2.83365e-18	1.96868e-16	OTTHUMG00000021756.1	FAM155B	HGNC:30701
ENSG00000111266.9	1423.52	0.937158	0.110913	3.63818e-18	2.51806e-16	OTTHUMG00000168582.5	DUSP16	HGNC:17909
ENSG00000104549.12	2661.08	-0.817443	0.0967275	4.02984e-18	2.77861e-16	OTTHUMG00000164990.3	SQLE	HGNC:11279
ENSG00000161547.16	12479	-0.74643	0.0870749	4.28767e-18	2.94528e-16	OTTHUMG00000177547.5	SRSF2	HGNC:10783
ENSG00000172667.11	472.063	-1.228	0.146574	4.48569e-18	3.06976e-16	OTTHUMG00000157290.7	ZMAT3	HGNC:29983
ENSG00000078399.19	2069.21	0.810143	0.0960077	4.68001e-18	3.19079e-16	OTTHUMG00000023220.10	HOXA9	HGNC:5109
ENSG00000198668.12	5781.64	-0.639528	0.0773213	5.79209e-18	3.93432e-16	OTTHUMG00000171044.4	CALM1	HGNC:1442
ENSG00000226051.8	106.536	1.59124	0.191154	6.59171e-18	4.46088e-16	OTTHUMG00000018524.24	ZNF503-AS1	HGNC:27370
ENSG00000164880.16	5986.42	-1.28198	0.154426	6.68983e-18	4.51058e-16	OTTHUMG00000151449.5	INTS1	HGNC:24555
ENSG00000125733.18	1866.72	0.798134	0.0951756	7.41351e-18	4.98013e-16	OTTHUMG00000150255.6	TRIP10	HGNC:12304
ENSG00000125912.11	3360.22	-0.664699	0.0790304	7.78773e-18	5.21236e-16	OTTHUMG00000180687.5	NCLN	HGNC:26923
ENSG00000176788.9	1058.36	1.45744	0.175958	8.98892e-18	5.99436e-16	OTTHUMG00000131061.8	BASP1	HGNC:957
ENSG00000152217.19	181.376	1.53888	0.185935	9.36382e-18	6.22166e-16	OTTHUMG00000132613.9	SETBP1	HGNC:15573
ENSG00000198042.11	1302.36	0.82597	0.0989147	9.46804e-18	6.26812e-16	OTTHUMG00000163957.5	MAK16	HGNC:13703
ENSG00000258441.1	1021.09	0.781907	0.0936141	9.94946e-18	6.56305e-16	OTTHUMG00000170756.1	LINC00641	HGNC:27511
ENSG00000113407.13	11405.4	0.949449	0.114491	1.12536e-17	7.39662e-16	OTTHUMG00000090683.4	TARS1	HGNC:11572
ENSG00000130303.13	241.294	-1.80021	0.218607	1.13899e-17	7.45934e-16	OTTHUMG00000191770.2	BST2	HGNC:1119
ENSG00000168476.12	1405.5	1.04562	0.12641	1.16581e-17	7.60772e-16	OTTHUMG00000131491.6	REEP4	HGNC:26176
ENSG00000106105.14	10303.1	0.948327	0.114459	1.18138e-17	7.68193e-16	OTTHUMG00000152769.2	GARS1	HGNC:4162
ENSG00000177283.7	747.861	-0.858221	0.103256	1.19599e-17	7.74934e-16	OTTHUMG00000017956.2	FZD8	HGNC:4046
ENSG00000136842.14	500.331	1.04021	0.125547	1.2373e-17	7.96056e-16	OTTHUMG00000020325.3	TMOD1	HGNC:11871
ENSG00000178752.16	737.709	0.712026	0.0853761	1.23613e-17	7.96056e-16	OTTHUMG00000152901.4	ERFE	HGNC:26727
ENSG00000064687.13	597.435	-1.14884	0.139206	1.34609e-17	8.6301e-16	OTTHUMG00000167547.10	ABCA7	HGNC:37
ENSG00000143537.13	2161.07	-1.00094	0.120997	1.36517e-17	8.72184e-16	OTTHUMG00000013898.5	ADAM15	HGNC:193
ENSG00000198890.9	1478.16	-0.842195	0.101252	1.37003e-17	8.72235e-16	OTTHUMG00000010964.4	PRMT6	HGNC:18241
ENSG00000126705.15	494.612	-0.933237	0.112979	1.44214e-17	9.11789e-16	OTTHUMG00000003398.7	AHDC1	HGNC:25230
ENSG00000168743.12	312.066	-1.06778	0.129424	1.44177e-17	9.11789e-16	OTTHUMG00000161189.3	NPNT	HGNC:27405
ENSG00000130702.15	1768.16	-1.30315	0.158527	1.54881e-17	9.75856e-16	OTTHUMG00000032908.6	LAMA5	HGNC:6485
ENSG00000145907.15	6152.4	-0.72651	0.08736	1.6872e-17	1.0594e-15	OTTHUMG00000130123.4	G3BP1	HGNC:30292
ENSG00000164211.13	365.779	-1.12643	0.136874	1.77125e-17	1.10837e-15	OTTHUMG00000128793.4	STARD4	HGNC:18058
ENSG00000168672.4	3456.95	-0.963423	0.116858	1.79189e-17	1.11745e-15	OTTHUMG00000165034.3	LRATD2	HGNC:24166
ENSG00000144908.13	74.806	2.56782	0.314714	1.9354e-17	1.20285e-15	OTTHUMG00000125551.4	ALDH1L1	HGNC:3978
ENSG00000264112.1	1695.18	1.18583	0.14449	2.00724e-17	1.24326e-15	OTTHUMG00000178780.1	AC015813.1
ENSG00000278311.5	2057.81	0.888283	0.107701	2.08546e-17	1.28735e-15	OTTHUMG00000193344.2	GGNBP2	HGNC:19357
ENSG00000198435.4	994.308	-1.21805	0.14869	2.439e-17	1.50052e-15	OTTHUMG00000156150.2	NRARP	HGNC:33843
ENSG00000092068.20	616.518	-0.85777	0.104735	2.46106e-17	1.50901e-15	OTTHUMG00000028720.6	SLC7A8	HGNC:11066
ENSG00000198612.11	1533.15	-0.78618	0.0954256	2.57626e-17	1.57436e-15	OTTHUMG00000133297.5	COPS8	HGNC:24335
ENSG00000120896.13	1580.84	0.8925	0.108582	2.59671e-17	1.58157e-15	OTTHUMG00000131728.7	SORBS3	HGNC:30907
ENSG00000135540.11	1320.22	1.54383	0.189571	2.80528e-17	1.70292e-15	OTTHUMG00000016321.3	NHSL1	HGNC:21021
ENSG00000167257.11	1107.44	0.771871	0.0936606	2.83172e-17	1.71328e-15	OTTHUMG00000167069.5	RNF214	HGNC:25335
ENSG00000123989.14	1671.37	-0.828423	0.101375	2.97887e-17	1.79637e-15	OTTHUMG00000058929.4	CHPF	HGNC:24291
ENSG00000135454.14	823.033	-0.874106	0.106718	3.30534e-17	1.98668e-15	OTTHUMG00000170190.6	B4GALNT1	HGNC:4117
ENSG00000166199.13	1002.82	0.924458	0.113278	4.01656e-17	2.40625e-15	OTTHUMG00000166417.4	ALKBH3	HGNC:30141
ENSG00000138111.14	545.4	-0.846806	0.103878	4.78758e-17	2.85878e-15	OTTHUMG00000018961.3	MFSD13A	HGNC:26196
ENSG00000173273.16	1847.41	1.01601	0.125212	5.16913e-17	3.07656e-15	OTTHUMG00000090481.4	TNKS	HGNC:11941
ENSG00000198796.7	78.2089	3.34227	0.415383	5.87874e-17	3.48754e-15	OTTHUMG00000132755.3	ALPK2	HGNC:20565
ENSG00000116133.13	6318.79	-0.769724	0.0946664	6.00033e-17	3.54816e-15	OTTHUMG00000009989.17	DHCR24	HGNC:2859
ENSG00000171056.8	233.58	1.09631	0.136174	7.99294e-17	4.71119e-15	OTTHUMG00000090585.2	SOX7	HGNC:18196
ENSG00000143013.13	1305.37	1.05887	0.131539	8.43587e-17	4.95628e-15	OTTHUMG00000010248.3	LMO4	HGNC:6644
ENSG00000251562.8	8477.37	1.11892	0.139678	1.1175e-16	6.54454e-15	OTTHUMG00000166322.5	MALAT1	HGNC:29665
ENSG00000081721.12	661.731	0.893494	0.111348	1.25082e-16	7.27867e-15	OTTHUMG00000034540.3	DUSP12	HGNC:3067
ENSG00000204947.9	259.188	1.186	0.149188	1.61656e-16	9.3771e-15	OTTHUMG00000158971.3	ZNF425	HGNC:20690
ENSG00000229415.9	90.9823	1.65676	0.208948	1.68533e-16	9.74505e-15	OTTHUMG00000170540.2	SFTA3	HGNC:18387
ENSG00000251022.6	2435.47	0.904726	0.112512	1.69333e-16	9.76044e-15	OTTHUMG00000160729.2	THAP9-AS1	HGNC:44172
ENSG00000225177.6	181.601	1.76383	0.223469	1.91683e-16	1.10139e-14	OTTHUMG00000015677.2	AL590617.2
ENSG00000118922.17	1331.39	0.989335	0.124416	1.93459e-16	1.10811e-14	OTTHUMG00000017078.2	KLF12	HGNC:6346
ENSG00000233101.10	138.475	1.42694	0.180197	1.9707e-16	1.12527e-14	OTTHUMG00000159919.3	HOXB-AS3	HGNC:40283
ENSG00000158106.14	574.624	-0.89672	0.112767	2.17923e-16	1.24047e-14	OTTHUMG00000165006.3	RHPN1	HGNC:19973
ENSG00000144381.17	32297.5	-0.619211	0.0773034	2.35327e-16	1.33537e-14	OTTHUMG00000154463.5	HSPD1	HGNC:5261
ENSG00000167522.16	9234.77	0.972465	0.122584	2.49896e-16	1.41366e-14	OTTHUMG00000175548.14	ANKRD11	HGNC:21316
ENSG00000127586.17	4028.69	-0.834383	0.105039	2.51162e-16	1.41643e-14	OTTHUMG00000047838.6	CHTF18	HGNC:18435
ENSG00000187840.5	4195.29	0.984572	0.124305	2.58429e-16	1.45293e-14	OTTHUMG00000164012.2	EIF4EBP1	HGNC:3288
ENSG00000170949.17	99.8494	-10.7826	3.00493	2.82855e-16	1.58538e-14	OTTHUMG00000182854.3	ZNF160	HGNC:12948
ENSG00000173281.5	404.33	1.58542	0.202054	2.98932e-16	1.67036e-14	OTTHUMG00000129329.3	PPP1R3B	HGNC:14942
ENSG00000241360.2	1872.37	-0.829666	0.104689	3.01932e-16	1.68198e-14	OTTHUMG00000044618.4	PDXP	HGNC:30259
ENSG00000167114.13	1301.83	-0.739043	0.0931218	3.42284e-16	1.89522e-14	OTTHUMG00000020746.3	SLC27A4	HGNC:10998
ENSG00000168487.19	659.456	0.786247	0.099279	3.54701e-16	1.95214e-14	OTTHUMG00000097761.9	BMP1	HGNC:1067
ENSG00000188707.6	1099.02	0.659529	0.0829796	3.54502e-16	1.95214e-14	OTTHUMG00000158328.2	ZBED6CL	HGNC:21720
ENSG00000171033.13	424.553	0.871137	0.110247	3.57023e-16	1.95902e-14	OTTHUMG00000164618.2	PKIA	HGNC:9017
ENSG00000127824.14	272.452	-1.73456	0.221864	3.66254e-16	2.00365e-14	OTTHUMG00000133126.7	TUBA4A	HGNC:12407
ENSG00000159479.17	1002.11	0.826113	0.104457	3.75853e-16	2.04697e-14	OTTHUMG00000007421.7	MED8	HGNC:19971
ENSG00000197457.10	814.099	-1.15164	0.14677	3.76413e-16	2.04697e-14	OTTHUMG00000032985.3	STMN3	HGNC:15926
ENSG00000136504.12	3422.15	0.588394	0.0739264	4.17448e-16	2.26339e-14	OTTHUMG00000161770.7	KAT7	HGNC:17016
ENSG00000104714.14	599.6	-0.97286	0.124042	4.78014e-16	2.5841e-14	OTTHUMG00000129163.5	ERICH1	HGNC:27234
ENSG00000066135.13	2746.45	0.608392	0.0767373	5.11343e-16	2.75612e-14	OTTHUMG00000007560.4	KDM4A	HGNC:22978
ENSG00000108439.10	1635.35	-0.656839	0.0830891	5.26322e-16	2.82852e-14	OTTHUMG00000178295.4	PNPO	HGNC:30260
ENSG00000117450.14	8012.94	-1.25801	0.161335	5.29997e-16	2.83419e-14	OTTHUMG00000007738.7	PRDX1	HGNC:9352
ENSG00000237452.2	65.4518	-2.17125	0.278742	5.3048e-16	2.83419e-14	OTTHUMG00000156178.3	BHMG1	HGNC:44318
ENSG00000082175.15	26.1614	3.90665	0.497165	5.49203e-16	2.92567e-14	OTTHUMG00000167531.4	PGR	HGNC:8910
ENSG00000116717.13	1204.71	0.97963	0.125205	5.62027e-16	2.98528e-14	OTTHUMG00000009374.5	GADD45A	HGNC:4095
ENSG00000088970.16	911.882	0.7408	0.0940671	5.72066e-16	3.0298e-14	OTTHUMG00000032020.6	KIZ	HGNC:15865
ENSG00000154319.16	163.09	1.49473	0.192269	5.79802e-16	3.06189e-14	OTTHUMG00000129361.6	FAM167A	HGNC:15549
ENSG00000075618.18	4814.16	-1.15606	0.148535	5.89852e-16	3.10599e-14	OTTHUMG00000090599.6	FSCN1	HGNC:11148
ENSG00000152492.15	1207.71	0.727126	0.0923396	5.98029e-16	3.14e-14	OTTHUMG00000156177.3	CCDC50	HGNC:18111
ENSG00000259820.1	483.788	-1.08897	0.139993	6.80592e-16	3.56326e-14	OTTHUMG00000164324.1	AC083843.3
ENSG00000070047.13	2326.26	-0.612308	0.0776183	6.84919e-16	3.57567e-14	OTTHUMG00000165141.7	PHRF1	HGNC:24351
ENSG00000088836.14	473.119	-1.11179	0.143102	6.96424e-16	3.61507e-14	OTTHUMG00000031740.8	SLC4A11	HGNC:16438
ENSG00000183751.15	2420.46	-0.737931	0.0941295	7.22056e-16	3.73751e-14	OTTHUMG00000128710.5	TBL3	HGNC:11587
ENSG00000173482.16	438.992	0.881748	0.113102	8.02386e-16	4.14158e-14	OTTHUMG00000131575.5	PTPRM	HGNC:9675
ENSG00000063244.12	9578.1	-0.618237	0.0786478	8.2129e-16	4.22721e-14	OTTHUMG00000180908.4	U2AF2	HGNC:23156
ENSG00000130707.18	2053.92	0.747252	0.0957065	9.47339e-16	4.8623e-14	OTTHUMG00000020806.5	ASS1	HGNC:758
ENSG00000285292.1	1385.41	0.936374	0.120756	9.6449e-16	4.93646e-14	OTTHUMG00000154570.4	ABCF2	HGNC:71
ENSG00000197136.4	1932.38	-0.805134	0.103718	1.17945e-15	6.01979e-14	OTTHUMG00000166539.2	PCNX3	HGNC:18760
ENSG00000104524.14	966.532	-0.750145	0.096589	1.26703e-15	6.44877e-14	OTTHUMG00000157010.7	PYCR3	HGNC:25846
ENSG00000189241.7	4898.04	-0.70049	0.090056	1.30173e-15	6.60702e-14	OTTHUMG00000015427.2	TSPYL1	HGNC:12382
ENSG00000258366.8	1142.54	-0.792888	0.102709	1.3322e-15	6.74293e-14	OTTHUMG00000032992.9	RTEL1	HGNC:15888
ENSG00000183691.6	189.725	-1.38191	0.180573	1.39905e-15	7.06173e-14	OTTHUMG00000151770.3	NOG	HGNC:7866
ENSG00000010810.17	3089.07	0.74962	0.0966534	1.46634e-15	7.38096e-14	OTTHUMG00000016305.10	FYN	HGNC:4037
ENSG00000170545.17	258.42	1.13329	0.147393	1.47387e-15	7.39849e-14	OTTHUMG00000185196.3	SMAGP	HGNC:26918
ENSG00000124496.12	367.977	-1.30275	0.17027	1.59413e-15	7.98028e-14	OTTHUMG00000014698.2	TRERF1	HGNC:18273
ENSG00000182093.16	710.556	-0.703459	0.0907887	1.63472e-15	8.16108e-14	OTTHUMG00000066250.22	GET1	HGNC:12790
ENSG00000204792.2	204.936	1.42599	0.186769	1.69756e-15	8.45174e-14	OTTHUMG00000152932.1	LINC01291	HGNC:50358
ENSG00000255052.5	124.377	1.74557	0.229309	1.84444e-15	9.15805e-14	OTTHUMG00000165269.5	FAM66D	HGNC:24159
ENSG00000034152.19	950.59	-0.690453	0.0893517	1.97131e-15	9.76143e-14	OTTHUMG00000134322.7	MAP2K3	HGNC:6843
ENSG00000134684.10	14401.9	0.821755	0.106783	1.97669e-15	9.76164e-14	OTTHUMG00000003933.2	YARS1	HGNC:12840
ENSG00000186193.9	1332.59	-1.04918	0.13717	1.9908e-15	9.8048e-14	OTTHUMG00000020961.4	SAPCD2	HGNC:28055
ENSG00000066735.14	1296.43	-0.717764	0.0930161	2.0302e-15	9.972e-14	OTTHUMG00000154986.3	KIF26A	HGNC:20226
ENSG00000228594.4	949.428	-0.88968	0.116365	2.53504e-15	1.24061e-13	OTTHUMG00000154864.5	FNDC10	HGNC:42951
ENSG00000160193.12	930.382	-0.849248	0.111025	2.65498e-15	1.29365e-13	OTTHUMG00000086826.2	WDR4	HGNC:12756
ENSG00000135821.18	10988.9	-0.661869	0.0860854	2.68851e-15	1.3065e-13	OTTHUMG00000037407.3	GLUL	HGNC:4341
ENSG00000147202.18	900.89	-0.762991	0.0995836	2.74426e-15	1.33005e-13	OTTHUMG00000022689.3	DIAPH2	HGNC:2877
ENSG00000146872.17	2966.25	0.746104	0.0972245	2.76838e-15	1.3382e-13	OTTHUMG00000179176.3	TLK2	HGNC:11842
ENSG00000255717.7	4953.16	0.973145	0.126546	2.78471e-15	1.34254e-13	OTTHUMG00000167743.15	SNHG1	HGNC:32688
ENSG00000139998.15	993.212	0.698419	0.091129	3.04377e-15	1.46357e-13	OTTHUMG00000142810.7	RAB15	HGNC:20150
ENSG00000006704.10	1098.22	0.60918	0.0790781	3.0666e-15	1.47068e-13	OTTHUMG00000023782.4	GTF2IRD1	HGNC:4661
ENSG00000170242.18	3313.55	0.614576	0.0797629	3.22267e-15	1.54148e-13	OTTHUMG00000165685.6	USP47	HGNC:20076
ENSG00000156711.17	119.182	-1.6768	0.222505	3.56474e-15	1.70065e-13	OTTHUMG00000014587.2	MAPK13	HGNC:6875
ENSG00000129159.7	394.462	-1.06766	0.141176	3.62906e-15	1.72683e-13	OTTHUMG00000166359.2	KCNC1	HGNC:6233
ENSG00000272449.2	137.347	-2.07721	0.277228	3.68327e-15	1.74807e-13	OTTHUMG00000185639.2	AL139246.5
ENSG00000186684.14	168.819	1.37043	0.181849	3.77306e-15	1.78604e-13	OTTHUMG00000153400.3	CYP27C1	HGNC:33480
ENSG00000080802.18	1292.45	0.83507	0.109802	4.10301e-15	1.93721e-13	OTTHUMG00000155568.5	CNOT4	HGNC:7880
ENSG00000150593.18	4224.55	0.88	0.11571	4.18105e-15	1.96897e-13	OTTHUMG00000019048.3	PDCD4	HGNC:8763
ENSG00000220008.3	84.375	1.6024	0.213544	4.55657e-15	2.1403e-13	OTTHUMG00000180418.2	LINGO3	HGNC:21206
ENSG00000196507.11	103.584	-2.55993	0.34226	4.67158e-15	2.1887e-13	OTTHUMG00000022106.2	TCEAL3	HGNC:28247
ENSG00000184185.10	457.561	-0.863645	0.114435	4.8025e-15	2.24428e-13	OTTHUMG00000132039.4	KCNJ12	HGNC:6258
ENSG00000116044.16	1474.31	0.811052	0.107055	5.25211e-15	2.44812e-13	OTTHUMG00000133620.18	NFE2L2	HGNC:7782
ENSG00000116062.16	6185.53	-0.592041	0.0776489	5.58529e-15	2.5968e-13	OTTHUMG00000129129.13	MSH6	HGNC:7329
ENSG00000168003.16	4408.4	0.808106	0.107091	5.88941e-15	2.73125e-13	OTTHUMG00000074091.8	SLC3A2	HGNC:11026
ENSG00000007372.23	1266.43	0.726069	0.0956213	5.98469e-15	2.76841e-13	OTTHUMG00000041447.26	PAX6	HGNC:8620
ENSG00000109944.11	216.625	1.05873	0.141101	6.40405e-15	2.95492e-13	OTTHUMG00000166027.3	JHY	HGNC:26288
ENSG00000165006.14	1653.94	0.611483	0.0804198	7.16016e-15	3.29547e-13	OTTHUMG00000000430.4	UBAP1	HGNC:12461
ENSG00000095713.14	129.515	-1.50876	0.202837	7.18164e-15	3.29706e-13	OTTHUMG00000018871.2	CRTAC1	HGNC:14882
ENSG00000133606.11	3659.58	0.673136	0.0887901	7.3393e-15	3.36099e-13	OTTHUMG00000157412.6	MKRN1	HGNC:7112
ENSG00000119912.17	2106.21	-0.813617	0.10809	7.68442e-15	3.51024e-13	OTTHUMG00000018759.6	IDE	HGNC:5381
ENSG00000250067.12	757.125	0.949176	0.126885	8.50303e-15	3.8745e-13	OTTHUMG00000162251.10	YJEFN3	HGNC:24785
ENSG00000006118.14	1471.28	-0.942151	0.126493	8.78953e-15	3.99508e-13	OTTHUMG00000167803.2	TMEM132A	HGNC:31092
ENSG00000183114.8	127.183	-1.74153	0.235592	8.87665e-15	4.02467e-13	OTTHUMG00000057491.2	FAM43B	HGNC:31791
ENSG00000103326.12	2512.67	-0.726106	0.0965554	8.96911e-15	4.05652e-13	OTTHUMG00000119059.6	CAPN15	HGNC:11182
ENSG00000157110.16	408.17	0.980895	0.131389	9.06623e-15	4.09033e-13	OTTHUMG00000163845.8	RBPMS	HGNC:19097
ENSG00000144161.13	968.601	0.982946	0.13169	9.11472e-15	4.10207e-13	OTTHUMG00000153270.4	ZC3H8	HGNC:30941
ENSG00000155975.10	535.601	0.987101	0.132386	9.69945e-15	4.3545e-13	OTTHUMG00000130785.6	VPS37A	HGNC:24928
ENSG00000120899.18	220.203	1.27462	0.171817	9.91611e-15	4.43926e-13	OTTHUMG00000102082.9	PTK2B	HGNC:9612
ENSG00000241852.10	202.915	1.18602	0.159754	9.93682e-15	4.43926e-13	OTTHUMG00000154160.7	C8orf58	HGNC:32233
ENSG00000085872.15	4503.47	-0.595752	0.078888	1.00262e-14	4.46825e-13	OTTHUMG00000169304.3	CHERP	HGNC:16930
ENSG00000158089.15	241.739	1.20804	0.163068	1.09769e-14	4.88004e-13	OTTHUMG00000074077.4	GALNT14	HGNC:22946
ENSG00000006459.11	994.127	1.0858	0.146663	1.19252e-14	5.28875e-13	OTTHUMG00000157327.2	KDM7A	HGNC:22224
ENSG00000172086.9	372.721	1.40665	0.190906	1.32141e-14	5.82549e-13	OTTHUMG00000130315.3	KRCC1	HGNC:28039
ENSG00000170919.16	301.093	0.903846	0.121666	1.33615e-14	5.86877e-13	OTTHUMG00000016851.10	TPT1-AS1	HGNC:43686
ENSG00000151773.13	315.381	1.3882	0.188484	1.34618e-14	5.89864e-13	OTTHUMG00000017413.9	CCDC122	HGNC:26478
ENSG00000163933.10	1192.95	-0.761195	0.10219	1.52306e-14	6.65775e-13	OTTHUMG00000074035.6	RFT1	HGNC:30220
ENSG00000104679.11	1293.97	0.941838	0.127243	1.54214e-14	6.72506e-13	OTTHUMG00000163786.4	R3HCC1	HGNC:27329
ENSG00000120685.20	3939.44	0.65797	0.0879809	1.63123e-14	7.09663e-13	OTTHUMG00000016764.9	PROSER1	HGNC:20291
ENSG00000143375.15	833.45	-0.944506	0.128199	1.73632e-14	7.53589e-13	OTTHUMG00000012497.16	CGN	HGNC:17429
ENSG00000187134.14	23.8269	3.98982	0.538505	1.74287e-14	7.54637e-13	OTTHUMG00000017580.4	AKR1C1	HGNC:384
ENSG00000184486.10	954.707	-0.746627	0.100534	1.76409e-14	7.6202e-13	OTTHUMG00000015258.4	POU3F2	HGNC:9215
ENSG00000113763.12	113.707	-1.36504	0.18639	1.83581e-14	7.9113e-13	OTTHUMG00000163225.4	UNC5A	HGNC:12567
ENSG00000058668.14	2277.81	-0.821534	0.111082	1.89188e-14	8.13376e-13	OTTHUMG00000035906.4	ATP2B4	HGNC:817
ENSG00000173852.14	1434.37	-0.781866	0.105853	2.01428e-14	8.63964e-13	OTTHUMG00000154888.4	DPY19L1	HGNC:22205
ENSG00000114019.14	684.783	0.760706	0.102652	2.04328e-14	8.7326e-13	OTTHUMG00000159777.7	AMOTL2	HGNC:17812
ENSG00000186567.13	205.201	1.46763	0.201023	2.04551e-14	8.7326e-13	OTTHUMG00000151528.6	CEACAM19	HGNC:31951
ENSG00000184347.14	300.802	1.10465	0.150538	2.12297e-14	9.04215e-13	OTTHUMG00000130409.4	SLIT3	HGNC:11087
ENSG00000285283.1	158.513	7.34103	0.98976	2.13981e-14	9.09268e-13	OTTHUMG00000192409.1	AL035078.4
ENSG00000104219.13	558.336	0.880842	0.119493	2.18152e-14	9.24843e-13	OTTHUMG00000163860.5	ZDHHC2	HGNC:18469
ENSG00000093010.14	2321.38	0.701346	0.0944375	2.19208e-14	9.27169e-13	OTTHUMG00000150529.9	COMT	HGNC:2228
ENSG00000135046.14	214.378	1.07563	0.146671	2.24886e-14	9.48988e-13	OTTHUMG00000020016.3	ANXA1	HGNC:533
ENSG00000140320.12	986.331	-0.687269	0.0927418	2.31153e-14	9.73184e-13	OTTHUMG00000129982.3	BAHD1	HGNC:29153
ENSG00000288062.1	94.2275	-1.54295	0.211861	2.37435e-14	9.97335e-13	OTTHUMG00000194909.1	AL136981.3
ENSG00000118898.16	66.1043	-2.04483	0.281471	2.38614e-14	9.9999e-13	OTTHUMG00000129528.9	PPL	HGNC:9273
ENSG00000165688.12	3637.91	-0.735041	0.0995332	2.44243e-14	1.02124e-12	OTTHUMG00000020926.5	PMPCA	HGNC:18667
ENSG00000272163.1	132.476	1.24609	0.170586	2.47843e-14	1.03157e-12	OTTHUMG00000185424.2	AF106564.1
ENSG00000163297.17	324.719	0.908265	0.123621	2.54699e-14	1.05769e-12	OTTHUMG00000151982.4	ANTXR2	HGNC:21732
ENSG00000139112.11	1058.82	0.726234	0.098352	2.6177e-14	1.08459e-12	OTTHUMG00000168411.10	GABARAPL1	HGNC:4068
ENSG00000104635.14	2499.46	1.02348	0.140253	3.0491e-14	1.26048e-12	OTTHUMG00000097791.7	SLC39A14	HGNC:20858
ENSG00000184271.17	205.921	1.20981	0.16631	3.0788e-14	1.26988e-12	OTTHUMG00000169622.5	POU6F1	HGNC:9224
ENSG00000032444.16	929.018	-1.00613	0.13808	3.34636e-14	1.37713e-12	OTTHUMG00000182094.3	PNPLA6	HGNC:16268
ENSG00000266074.8	1851.33	-0.983251	0.134997	3.4405e-14	1.41269e-12	OTTHUMG00000184171.3	BAHCC1	HGNC:29279
ENSG00000055130.17	4820.35	0.638776	0.086835	3.84651e-14	1.57233e-12	OTTHUMG00000152776.7	CUL1	HGNC:2551
ENSG00000162458.13	627.252	0.68995	0.0940225	3.91233e-14	1.59567e-12	OTTHUMG00000003079.8	FBLIM1	HGNC:24686
ENSG00000164466.13	4233.35	-0.602563	0.0818173	3.93725e-14	1.60226e-12	OTTHUMG00000130555.6	SFXN1	HGNC:16085
ENSG00000033030.15	1317.54	0.927253	0.127681	4.4063e-14	1.78915e-12	OTTHUMG00000168878.6	ZCCHC8	HGNC:25265
ENSG00000156639.12	1357.54	0.861765	0.118	4.66523e-14	1.89009e-12	OTTHUMG00000014629.7	ZFAND3	HGNC:18019
ENSG00000176771.17	58.6917	1.9806	0.275578	4.79259e-14	1.93739e-12	OTTHUMG00000153573.11	NCKAP5	HGNC:29847
ENSG00000129521.14	262.252	-1.25907	0.174771	4.81897e-14	1.94376e-12	OTTHUMG00000029498.11	EGLN3	HGNC:14661
ENSG00000153790.12	404.517	0.884694	0.121771	4.86803e-14	1.95922e-12	OTTHUMG00000128497.4	C7orf31	HGNC:21722
ENSG00000205464.12	197.584	1.08851	0.150818	5.02015e-14	2.016e-12	OTTHUMG00000162558.4	ATP6AP1L	HGNC:28091
ENSG00000196711.9	248.545	-1.10724	0.153631	5.22393e-14	2.09014e-12	OTTHUMG00000164256.2	ALKAL1	HGNC:33775
ENSG00000198719.9	537.782	-0.826062	0.113769	5.22763e-14	2.09014e-12	OTTHUMG00000016078.4	DLL1	HGNC:2908
ENSG00000197702.14	868.42	0.794943	0.109624	5.95486e-14	2.3757e-12	OTTHUMG00000165778.6	PARVA	HGNC:14652
ENSG00000144746.7	1933.64	-0.616688	0.0842085	6.03649e-14	2.40302e-12	OTTHUMG00000158773.2	ARL6IP5	HGNC:16937
ENSG00000150347.16	727.101	0.825507	0.113991	6.08872e-14	2.41576e-12	OTTHUMG00000018298.3	ARID5B	HGNC:17362
ENSG00000162413.16	1036.19	-0.779001	0.107725	6.09492e-14	2.41576e-12	OTTHUMG00000001437.3	KLHL21	HGNC:29041
ENSG00000142871.17	455.889	1.14782	0.159893	6.42564e-14	2.54133e-12	OTTHUMG00000010577.2	CCN1	HGNC:2654
ENSG00000066136.20	1815.98	0.665558	0.0914946	6.87168e-14	2.70602e-12	OTTHUMG00000007729.5	NFYC	HGNC:7806
ENSG00000143126.8	1675.93	-1.30168	0.18216	6.86061e-14	2.70602e-12	OTTHUMG00000012003.2	CELSR2	HGNC:3231
ENSG00000128394.17	235.255	0.939596	0.130428	6.93174e-14	2.7238e-12	OTTHUMG00000151080.4	APOBEC3F	HGNC:17356
ENSG00000141682.11	3846.75	1.03716	0.14455	7.64539e-14	2.99136e-12	OTTHUMG00000132765.2	PMAIP1	HGNC:9108
ENSG00000147457.14	1270.5	0.628904	0.0867408	8.90522e-14	3.47684e-12	OTTHUMG00000131785.6	CHMP7	HGNC:28439
ENSG00000131584.19	1444.35	-0.828063	0.115315	9.25748e-14	3.60667e-12	OTTHUMG00000002235.5	ACAP3	HGNC:16754
ENSG00000101187.16	263.728	-1.15999	0.162825	9.49324e-14	3.69065e-12	OTTHUMG00000032923.5	SLCO4A1	HGNC:10953
ENSG00000173210.19	125.287	1.24401	0.174798	9.67567e-14	3.75359e-12	OTTHUMG00000129932.3	ABLIM3	HGNC:29132
ENSG00000174951.11	44.2735	3.34051	0.471914	9.83845e-14	3.80865e-12	OTTHUMG00000183325.3	FUT1	HGNC:4012
ENSG00000178695.6	5499.06	-0.955455	0.133775	1.01555e-13	3.92308e-12	OTTHUMG00000017096.4	KCTD12	HGNC:14678
ENSG00000111254.8	140.677	1.20739	0.170077	1.07677e-13	4.15079e-12	OTTHUMG00000168226.5	AKAP3	HGNC:373
ENSG00000135723.14	1623.05	-0.982323	0.137757	1.0811e-13	4.1587e-12	OTTHUMG00000137521.5	FHOD1	HGNC:17905
ENSG00000115194.11	315.653	-1.22255	0.17269	1.18036e-13	4.531e-12	OTTHUMG00000128409.5	SLC30A3	HGNC:11014
ENSG00000105771.14	1270.32	0.809758	0.113348	1.28582e-13	4.92548e-12	OTTHUMG00000150337.5	SMG9	HGNC:25763
ENSG00000161513.12	959.55	-0.892679	0.125486	1.34912e-13	5.15714e-12	OTTHUMG00000179026.9	FDXR	HGNC:3642
ENSG00000160957.13	3125.6	-0.6927	0.09719	1.36377e-13	5.20224e-12	OTTHUMG00000165178.7	RECQL4	HGNC:9949
ENSG00000152092.16	89.107	2.6646	0.374886	1.3693e-13	5.21245e-12	OTTHUMG00000035041.3	ASTN1	HGNC:773
ENSG00000157349.16	1305.98	0.725408	0.101407	1.4252e-13	5.41398e-12	OTTHUMG00000137577.6	DDX19B	HGNC:2742
ENSG00000164743.5	49.7161	2.2101	0.314446	1.43989e-13	5.45842e-12	OTTHUMG00000165482.2	C8orf48	HGNC:26345
ENSG00000143643.13	1192.81	-0.661719	0.0922667	1.45558e-13	5.50649e-12	OTTHUMG00000037788.5	TTC13	HGNC:26204
ENSG00000162004.17	340.972	-0.81286	0.114332	1.49902e-13	5.65911e-12	OTTHUMG00000121176.7	CCDC78	HGNC:14153
ENSG00000162783.11	1952.59	-0.98977	0.140002	1.53858e-13	5.79648e-12	OTTHUMG00000035178.3	IER5	HGNC:5393
ENSG00000136732.16	763.378	0.989915	0.139934	1.56155e-13	5.87091e-12	OTTHUMG00000131464.4	GYPC	HGNC:4704
ENSG00000114978.18	2719.28	-0.613307	0.0854819	1.62008e-13	6.07844e-12	OTTHUMG00000152833.3	MOB1A	HGNC:16015
ENSG00000285793.1	719.754	0.637436	0.0891505	1.62936e-13	6.10076e-12	OTTHUMG00000193336.1	AC125232.2
ENSG00000162769.13	631.512	-0.832731	0.117323	1.71099e-13	6.39328e-12	OTTHUMG00000036924.4	FLVCR1	HGNC:24682
ENSG00000196172.9	32.7113	2.4319	0.346919	1.72752e-13	6.44188e-12	OTTHUMG00000150831.4	ZNF681	HGNC:26457
ENSG00000181284.3	149.169	-1.40515	0.200526	1.76362e-13	6.56311e-12	OTTHUMG00000132901.2	TMEM102	HGNC:26722
ENSG00000165349.12	493.422	0.784443	0.110476	1.84185e-13	6.84029e-12	OTTHUMG00000021780.2	SLC7A3	HGNC:11061
ENSG00000143815.15	4066.51	-0.897106	0.126941	1.90176e-13	7.04846e-12	OTTHUMG00000037520.18	LBR	HGNC:6518
ENSG00000131389.17	689.64	-1.23328	0.176169	1.93985e-13	7.17511e-12	OTTHUMG00000155525.10	SLC6A6	HGNC:11052
ENSG00000132182.12	5392.03	-1.1737	0.167474	2.02897e-13	7.4746e-12	OTTHUMG00000157268.3	NUP210	HGNC:30052
ENSG00000151632.17	22.1883	4.81822	0.670956	2.02901e-13	7.4746e-12	OTTHUMG00000017584.4	AKR1C2	HGNC:385
ENSG00000092421.16	1477.63	0.642012	0.0900356	2.03505e-13	7.48179e-12	OTTHUMG00000162987.6	SEMA6A	HGNC:10738
ENSG00000092445.12	1024.2	-0.685248	0.0964027	2.1415e-13	7.84157e-12	OTTHUMG00000130341.7	TYRO3	HGNC:12446
ENSG00000137135.18	851.445	-0.748603	0.106004	2.15519e-13	7.87592e-12	OTTHUMG00000019869.6	ARHGEF39	HGNC:25909
ENSG00000160991.16	756.563	-0.643134	0.0904435	2.27808e-13	8.3084e-12	OTTHUMG00000157722.4	ORAI2	HGNC:21667
ENSG00000092621.12	21734.7	0.608903	0.0852338	2.40224e-13	8.74378e-12	OTTHUMG00000012100.6	PHGDH	HGNC:8923
ENSG00000113161.16	1647.16	-0.688211	0.0972187	2.48887e-13	9.02316e-12	OTTHUMG00000102069.6	HMGCR	HGNC:5006
ENSG00000114573.10	1546.35	-0.633096	0.0890888	2.48614e-13	9.02316e-12	OTTHUMG00000159295.3	ATP6V1A	HGNC:851
ENSG00000110066.15	1336.75	0.724185	0.102388	2.51751e-13	9.10891e-12	OTTHUMG00000150484.8	KMT5B	HGNC:24283
ENSG00000174684.7	1680.12	-0.924069	0.131808	2.71357e-13	9.79887e-12	OTTHUMG00000167082.2	B4GAT1	HGNC:15685
ENSG00000153071.15	588.914	0.851686	0.121288	2.95063e-13	1.06339e-11	OTTHUMG00000162043.5	DAB2	HGNC:2662
ENSG00000106006.6	557.572	1.08758	0.15598	3.00495e-13	1.08083e-11	OTTHUMG00000023216.9	HOXA6	HGNC:5107
ENSG00000184481.17	877.543	0.694631	0.0984777	3.14396e-13	1.1264e-11	OTTHUMG00000021789.3	FOXO4	HGNC:7139
ENSG00000126870.16	1237.03	0.611396	0.0863125	3.15893e-13	1.12955e-11	OTTHUMG00000151443.5	WDR60	HGNC:21862
ENSG00000067064.11	1883.06	-0.675659	0.0957644	3.23113e-13	1.15311e-11	OTTHUMG00000017536.4	IDI1	HGNC:5387
ENSG00000160285.15	2552.66	-0.679345	0.0964076	3.29501e-13	1.17361e-11	OTTHUMG00000090633.10	LSS	HGNC:6708
ENSG00000196338.12	116.4	1.23124	0.177173	3.3074e-13	1.17574e-11	OTTHUMG00000021790.2	NLGN3	HGNC:14289
ENSG00000144649.9	151.721	-1.13636	0.163759	3.58558e-13	1.26968e-11	OTTHUMG00000156449.6	GASK1A	HGNC:24485
ENSG00000145284.12	667.844	-0.743361	0.106201	3.84786e-13	1.35992e-11	OTTHUMG00000130293.2	SCD5	HGNC:21088
ENSG00000101126.18	3898.76	0.604427	0.0854469	3.87695e-13	1.36756e-11	OTTHUMG00000032737.28	ADNP	HGNC:15766
ENSG00000091164.13	1585.04	0.759439	0.108363	3.90083e-13	1.37333e-11	OTTHUMG00000132722.7	TXNL1	HGNC:12436
ENSG00000027001.10	509.491	-0.777357	0.111263	4.13567e-13	1.45042e-11	OTTHUMG00000016573.3	MIPEP	HGNC:7104
ENSG00000135638.14	196.498	-1.2798	0.185644	4.30638e-13	1.5074e-11	OTTHUMG00000129778.8	EMX1	HGNC:3340
ENSG00000176022.7	1183.39	-0.803608	0.115367	4.81379e-13	1.68179e-11	OTTHUMG00000001813.3	B3GALT6	HGNC:17978
ENSG00000250802.7	300.46	1.38945	0.202244	4.85297e-13	1.69224e-11	OTTHUMG00000162473.6	ZBED3-AS1	HGNC:44188
ENSG00000157764.13	1215.35	0.797172	0.114727	5.33086e-13	1.8483e-11	OTTHUMG00000157457.6	BRAF	HGNC:1097
ENSG00000198795.11	519.265	0.680771	0.0974416	5.36048e-13	1.85505e-11	OTTHUMG00000179511.4	ZNF521	HGNC:24605
ENSG00000176170.13	205.696	-1.29494	0.189285	6.15471e-13	2.12587e-11	OTTHUMG00000180177.2	SPHK1	HGNC:11240
ENSG00000144642.22	200.547	0.94127	0.136505	6.3167e-13	2.17771e-11	OTTHUMG00000155699.10	RBMS3	HGNC:13427
ENSG00000106070.19	2448.18	0.981086	0.142606	6.46278e-13	2.22388e-11	OTTHUMG00000150622.21	GRB10	HGNC:4564
ENSG00000099250.18	946.518	1.00986	0.146679	6.4959e-13	2.23107e-11	OTTHUMG00000019343.8	NRP1	HGNC:8004
ENSG00000101230.6	58.4517	1.99002	0.291333	6.70095e-13	2.29718e-11	OTTHUMG00000031902.3	ISM1	HGNC:16213
ENSG00000143457.11	1103.12	0.631529	0.0904031	6.89178e-13	2.35818e-11	OTTHUMG00000035009.4	GOLPH3L	HGNC:24882
ENSG00000154328.16	289.902	0.844304	0.122399	7.01125e-13	2.39457e-11	OTTHUMG00000090753.6	NEIL2	HGNC:18956
ENSG00000104299.15	616.126	0.654936	0.0942386	7.32649e-13	2.49757e-11	OTTHUMG00000164030.3	INTS9	HGNC:25592
ENSG00000243335.9	826.001	0.759112	0.109992	7.73462e-13	2.63179e-11	OTTHUMG00000129543.7	KCTD7	HGNC:21957
ENSG00000160796.18	1719.93	-0.884755	0.128617	7.77702e-13	2.6364e-11	OTTHUMG00000156497.11	NBEAL2	HGNC:31928
ENSG00000179562.3	936.361	0.792898	0.114997	7.90446e-13	2.67464e-11	OTTHUMG00000023590.4	GCC1	HGNC:19095
ENSG00000224616.3	489.164	0.841567	0.122404	8.15593e-13	2.75462e-11	OTTHUMG00000040490.5	RTCA-AS1	HGNC:50573
ENSG00000115541.11	2969.88	-1.04751	0.153958	8.22519e-13	2.77289e-11	OTTHUMG00000132749.3	HSPE1	HGNC:5269
ENSG00000261824.7	386.484	0.958414	0.14008	8.64161e-13	2.90791e-11	OTTHUMG00000175754.56	LINC00662	HGNC:27122
ENSG00000214595.12	283.037	-1.10314	0.162023	9.63771e-13	3.23714e-11	OTTHUMG00000152035.11	EML6	HGNC:35412
ENSG00000141428.17	1247.17	0.837577	0.122391	9.90356e-13	3.32033e-11	OTTHUMG00000128531.5	C18orf21	HGNC:28802
ENSG00000105894.12	21.0096	4.74575	0.683026	1.00778e-12	3.3664e-11	OTTHUMG00000155709.3	PTN	HGNC:9630
ENSG00000141232.5	1056.45	-0.833065	0.121837	1.08023e-12	3.58872e-11	OTTHUMG00000162277.4	TOB1	HGNC:11979
ENSG00000169071.15	322.626	-1.17043	0.172888	1.0792e-12	3.58872e-11	OTTHUMG00000020211.5	ROR2	HGNC:10257
ENSG00000259485.2	20.7237	3.14404	0.462437	1.07651e-12	3.58872e-11	OTTHUMG00000172035.10	LINC02253	HGNC:53151
ENSG00000135127.11	88.4996	-1.64045	0.243457	1.11002e-12	3.67518e-11	OTTHUMG00000169311.5	BICDL1	HGNC:28095
ENSG00000167700.9	982.305	-1.2118	0.179077	1.11028e-12	3.67518e-11	OTTHUMG00000165177.3	MFSD3	HGNC:25157
ENSG00000180044.5	87.9535	-1.4026	0.208011	1.19786e-12	3.95792e-11	OTTHUMG00000158950.3	C3orf80	HGNC:40048
ENSG00000028116.17	642.317	0.744578	0.108699	1.20832e-12	3.98528e-11	OTTHUMG00000129348.8	VRK2	HGNC:12719
ENSG00000122779.18	2998.61	0.665207	0.0969015	1.34885e-12	4.43277e-11	OTTHUMG00000155820.5	TRIM24	HGNC:11812
ENSG00000230606.11	537.864	1.24449	0.18497	1.43996e-12	4.7237e-11	OTTHUMG00000152989.12	AC092683.1
ENSG00000230487.8	223.202	1.06272	0.157563	1.52892e-12	5.00653e-11	OTTHUMG00000151452.4	PSMG3-AS1	HGNC:22230
ENSG00000182551.14	1456.28	0.667246	0.0976162	1.57105e-12	5.13529e-11	OTTHUMG00000112441.7	ADI1	HGNC:30576
ENSG00000001460.18	590.553	0.650972	0.0951416	1.59757e-12	5.20404e-11	OTTHUMG00000003297.4	STPG1	HGNC:28070
ENSG00000177706.9	295.374	1.02162	0.151865	1.59778e-12	5.20404e-11	OTTHUMG00000151401.5	FAM20C	HGNC:22140
ENSG00000197892.13	480.936	0.801902	0.118088	1.61356e-12	5.24606e-11	OTTHUMG00000164032.2	KIF13B	HGNC:14405
ENSG00000173621.9	1003.66	-1.04351	0.15499	1.6474e-12	5.34659e-11	OTTHUMG00000167100.3	LRFN4	HGNC:28456
ENSG00000100906.10	524.448	0.765619	0.112653	1.70589e-12	5.50708e-11	OTTHUMG00000140220.4	NFKBIA	HGNC:7797
ENSG00000157693.15	723.933	1.07474	0.15978	1.7044e-12	5.50708e-11	OTTHUMG00000020541.2	TMEM268	HGNC:24513
ENSG00000197265.9	974.892	0.827766	0.122356	1.80045e-12	5.79188e-11	OTTHUMG00000163934.4	GTF2E2	HGNC:4651
ENSG00000249673.7	520.87	-0.818045	0.120905	1.82854e-12	5.8719e-11	OTTHUMG00000160136.4	NOP14-AS1	HGNC:20205
ENSG00000138433.16	1213.1	0.840188	0.124212	1.83188e-12	5.87231e-11	OTTHUMG00000132338.4	CIR1	HGNC:24217
ENSG00000198538.11	42.5044	-9.30699	2.83726	2.01149e-12	6.42551e-11	OTTHUMG00000154564.9	ZNF28	HGNC:13073
ENSG00000169683.8	1787.93	-0.730533	0.107889	2.02268e-12	6.44998e-11	OTTHUMG00000178454.4	LRRC45	HGNC:28302
ENSG00000213533.12	606.552	-0.769461	0.113828	2.10252e-12	6.69289e-11	OTTHUMG00000150346.10	STIMATE	HGNC:30526
ENSG00000033178.13	1643.6	-0.821855	0.122219	2.12891e-12	6.75862e-11	OTTHUMG00000129299.7	UBA6	HGNC:25581
ENSG00000188582.9	64.858	-1.7244	0.259343	2.13056e-12	6.75862e-11	OTTHUMG00000159313.3	PAQR9	HGNC:30131
ENSG00000143479.17	829.633	-0.682739	0.101394	2.35659e-12	7.46267e-11	OTTHUMG00000036339.5	DYRK3	HGNC:3094
ENSG00000165672.7	3663.1	-0.679177	0.10036	2.41253e-12	7.62661e-11	OTTHUMG00000019146.3	PRDX3	HGNC:9354
ENSG00000173894.11	2957.99	-0.61939	0.0913676	2.55648e-12	8.05379e-11	OTTHUMG00000177463.2	CBX2	HGNC:1552
ENSG00000064042.18	485.897	0.870408	0.129997	2.70561e-12	8.50892e-11	OTTHUMG00000160575.7	LIMCH1	HGNC:29191
ENSG00000102547.19	126.317	1.24036	0.186916	2.7574e-12	8.64205e-11	OTTHUMG00000016914.6	CAB39L	HGNC:20290
ENSG00000126391.14	639.612	-0.631251	0.0933439	2.75516e-12	8.64205e-11	OTTHUMG00000166275.4	FRMD8	HGNC:25462
ENSG00000165392.11	911.61	0.862986	0.128977	2.81634e-12	8.81168e-11	OTTHUMG00000163894.4	WRN	HGNC:12791
ENSG00000175445.17	146.166	1.18114	0.177884	2.85277e-12	8.91039e-11	OTTHUMG00000036645.9	LPL	HGNC:6677
ENSG00000260920.2	131.379	1.54099	0.233588	2.95518e-12	9.21451e-11	OTTHUMG00000175830.2	AL031985.3
ENSG00000102230.14	170.256	-1.1211	0.168855	2.96764e-12	9.23761e-11	OTTHUMG00000021270.6	PCYT1B	HGNC:8755
ENSG00000131981.16	33.9492	-2.89971	0.438975	3.10418e-12	9.6135e-11	OTTHUMG00000171030.5	LGALS3	HGNC:6563
ENSG00000169981.11	132.627	-1.41895	0.215098	3.1588e-12	9.76611e-11	OTTHUMG00000133091.13	ZNF35	HGNC:13099
ENSG00000129353.15	1972.06	0.713018	0.106031	3.18854e-12	9.84139e-11	OTTHUMG00000180585.4	SLC44A2	HGNC:17292
ENSG00000096070.19	1621.68	0.916217	0.13759	3.21682e-12	9.91192e-11	OTTHUMG00000014589.8	BRPF3	HGNC:14256
ENSG00000151287.17	194.236	-1.21175	0.183243	3.33412e-12	1.02561e-10	OTTHUMG00000017306.6	TEX30	HGNC:25188
ENSG00000068001.14	643.735	-0.796973	0.119426	3.50032e-12	1.07312e-10	OTTHUMG00000156876.2	HYAL2	HGNC:5321
ENSG00000162073.14	1685.72	-0.649805	0.0968468	3.4958e-12	1.07312e-10	OTTHUMG00000128977.3	PAQR4	HGNC:26386
ENSG00000277701.5	712.116	1.37657	0.209204	3.51193e-12	1.07488e-10	OTTHUMG00000188202.4	AC159540.2
ENSG00000113657.13	195.408	0.885486	0.132993	3.55677e-12	1.08678e-10	OTTHUMG00000163437.4	DPYSL3	HGNC:3015
ENSG00000099814.16	2065.29	-0.63159	0.093937	3.62612e-12	1.10612e-10	OTTHUMG00000170763.3	CEP170B	HGNC:20362
ENSG00000239887.6	527.756	0.755314	0.11342	3.94888e-12	1.19857e-10	OTTHUMG00000031376.5	C1orf226	HGNC:34351
ENSG00000198040.10	664.091	0.731533	0.109711	4.047e-12	1.22428e-10	OTTHUMG00000167939.6	ZNF84	HGNC:13159
ENSG00000172340.14	1637.07	-0.60499	0.09024	4.58526e-12	1.38254e-10	OTTHUMG00000158740.1	SUCLG2	HGNC:11450
ENSG00000184208.12	1906.88	0.636745	0.0951698	4.61082e-12	1.38567e-10	OTTHUMG00000151188.8	C22orf46	HGNC:26294
ENSG00000133019.11	28.2221	2.56644	0.391909	4.69364e-12	1.40825e-10	OTTHUMG00000039649.5	CHRM3	HGNC:1952
ENSG00000136574.17	915.427	0.80296	0.121007	4.73195e-12	1.41741e-10	OTTHUMG00000090800.4	GATA4	HGNC:4173
ENSG00000116396.14	655.602	-0.688654	0.103411	4.91728e-12	1.47051e-10	OTTHUMG00000011037.11	KCNC4	HGNC:6236
ENSG00000130066.16	1705.71	0.888102	0.134541	5.02841e-12	1.50129e-10	OTTHUMG00000021256.1	SAT1	HGNC:10540
ENSG00000280165.1	155.055	-1.40536	0.215387	5.08459e-12	1.51559e-10	OTTHUMG00000017012.5	PCDH20	HGNC:14257
ENSG00000121966.7	146.748	-1.58468	0.243283	5.11275e-12	1.5215e-10	OTTHUMG00000153583.2	CXCR4	HGNC:2561
ENSG00000262001.1	23.0543	3.12631	0.478661	5.63004e-12	1.67e-10	OTTHUMG00000177864.1	DLGAP1-AS2	HGNC:28146
ENSG00000166123.14	2232.09	0.822978	0.124697	5.77114e-12	1.70908e-10	OTTHUMG00000132541.5	GPT2	HGNC:18062
ENSG00000171462.15	101.483	-1.70946	0.264161	6.49553e-12	1.92049e-10	OTTHUMG00000014735.3	DLK2	HGNC:21113
ENSG00000104312.8	997.705	0.608812	0.0915927	6.52507e-12	1.92611e-10	OTTHUMG00000163809.3	RIPK2	HGNC:10020
ENSG00000136997.19	3745.56	-0.990797	0.151705	6.72355e-12	1.97831e-10	OTTHUMG00000128475.10	MYC	HGNC:7553
ENSG00000181852.18	1261.08	0.611871	0.0921935	7.10414e-12	2.08358e-10	OTTHUMG00000170328.4	RNF41	HGNC:18401
ENSG00000196642.19	6396.95	-0.736625	0.111753	7.258e-12	2.12529e-10	OTTHUMG00000020947.13	RABL6	HGNC:24703
ENSG00000178718.6	1354.14	-0.922253	0.141999	7.39988e-12	2.16337e-10	OTTHUMG00000142822.2	RPP25	HGNC:30361
ENSG00000072121.16	1253.19	-0.862667	0.131913	7.51411e-12	2.19326e-10	OTTHUMG00000171274.5	ZFYVE26	HGNC:20761
ENSG00000101311.15	68.0804	-7.84278	1.286	7.6022e-12	2.21543e-10	OTTHUMG00000031826.4	FERMT1	HGNC:15889
ENSG00000163431.13	421.968	0.707621	0.107128	7.72802e-12	2.24851e-10	OTTHUMG00000035802.3	LMOD1	HGNC:6647
ENSG00000168916.15	905.947	0.952351	0.146134	8.05213e-12	2.33909e-10	OTTHUMG00000162999.4	ZNF608	HGNC:29238
ENSG00000196236.13	1133.9	-0.626272	0.0948117	8.27428e-12	2.3998e-10	OTTHUMG00000151312.6	XPNPEP3	HGNC:28052
ENSG00000174136.13	776.142	0.751313	0.114285	8.31811e-12	2.40869e-10	OTTHUMG00000162745.3	RGMB	HGNC:26896
ENSG00000139174.12	312.019	1.048	0.161596	8.5654e-12	2.47638e-10	OTTHUMG00000169443.5	PRICKLE1	HGNC:17019
ENSG00000108511.10	2507.49	0.651252	0.0986736	8.5797e-12	2.47659e-10	OTTHUMG00000159912.6	HOXB6	HGNC:5117
ENSG00000164116.16	288.629	1.00515	0.154616	8.6021e-12	2.47914e-10	OTTHUMG00000161700.3	GUCY1A1	HGNC:4685
ENSG00000113356.12	693.242	-0.759613	0.115932	8.65547e-12	2.49059e-10	OTTHUMG00000162809.6	POLR3G	HGNC:30075
ENSG00000147121.16	466.03	0.810277	0.123958	8.77657e-12	2.52147e-10	OTTHUMG00000021421.4	KRBOX4	HGNC:26007
ENSG00000188848.16	756.083	-0.648218	0.0984386	9.09463e-12	2.60875e-10	OTTHUMG00000160531.5	BEND4	HGNC:23815
ENSG00000112701.18	2407.81	0.62269	0.094398	9.10896e-12	2.60876e-10	OTTHUMG00000015060.5	SENP6	HGNC:20944
ENSG00000164076.17	448.534	-0.782304	0.119699	9.53294e-12	2.72166e-10	OTTHUMG00000158288.7	CAMKV	HGNC:28788
ENSG00000274070.2	642.061	-0.723971	0.110702	1.0191e-11	2.905e-10	OTTHUMG00000181541.3	CASTOR2	HGNC:37073
ENSG00000177971.8	1316.2	-1.11965	0.174442	1.08977e-11	3.09677e-10	OTTHUMG00000142840.3	IMP3	HGNC:14497
ENSG00000132016.11	246.618	0.845532	0.130209	1.1309e-11	3.20369e-10	OTTHUMG00000181851.2	C19orf57	HGNC:28153
ENSG00000144451.19	331.722	-0.753158	0.115589	1.13785e-11	3.2184e-10	OTTHUMG00000133015.9	SPAG16	HGNC:23225
ENSG00000124164.16	2775.74	0.736254	0.112935	1.21209e-11	3.42307e-10	OTTHUMG00000032840.4	VAPB	HGNC:12649
ENSG00000197774.13	1375.19	-0.634001	0.0969311	1.26029e-11	3.5537e-10	OTTHUMG00000176706.4	EME2	HGNC:27289
ENSG00000078246.17	1129.16	0.62313	0.095205	1.30039e-11	3.65931e-10	OTTHUMG00000168152.3	TULP3	HGNC:12425
ENSG00000064489.23	167.435	0.965348	0.14987	1.33448e-11	3.74555e-10	OTTHUMG00000154572.8	BORCS8-MEF2B	HGNC:39979
ENSG00000152137.6	227.332	0.963828	0.149832	1.34326e-11	3.76443e-10	OTTHUMG00000168932.2	HSPB8	HGNC:30171
ENSG00000171604.12	424.231	-0.946002	0.147062	1.38107e-11	3.86445e-10	OTTHUMG00000163331.5	CXXC5	HGNC:26943
ENSG00000204178.11	1160.58	0.606802	0.0926435	1.44921e-11	4.03659e-10	OTTHUMG00000003473.6	MACO1	HGNC:25572
ENSG00000125386.15	1360.93	0.633884	0.09732	1.53523e-11	4.2567e-10	OTTHUMG00000160512.4	FAM193A	HGNC:16822
ENSG00000198963.11	90.9969	1.52413	0.239846	1.53893e-11	4.26051e-10	OTTHUMG00000020026.3	RORB	HGNC:10259
ENSG00000184083.12	291.461	-0.836611	0.129883	1.58402e-11	4.3787e-10	OTTHUMG00000021625.4	FAM120C	HGNC:16949
ENSG00000164068.16	1570.71	-0.703987	0.108693	1.59408e-11	4.39986e-10	OTTHUMG00000156891.7	RNF123	HGNC:21148
ENSG00000167333.13	501.285	0.766154	0.118536	1.61612e-11	4.45395e-10	OTTHUMG00000165723.4	TRIM68	HGNC:21161
ENSG00000134824.14	1464.72	-0.667407	0.102965	1.67402e-11	4.60659e-10	OTTHUMG00000163794.5	FADS2	HGNC:3575
ENSG00000118276.11	548.065	-0.984611	0.154037	1.70566e-11	4.68658e-10	OTTHUMG00000131980.4	B4GALT6	HGNC:929
ENSG00000255737.2	279.69	-1.27035	0.200642	1.80351e-11	4.948e-10	OTTHUMG00000170286.1	AGAP2-AS1	HGNC:48633
ENSG00000178921.14	3467.28	-0.737578	0.114505	1.85974e-11	5.08699e-10	OTTHUMG00000108188.5	PFAS	HGNC:8863
ENSG00000196455.8	1130.71	-0.681912	0.105502	1.86724e-11	5.09987e-10	OTTHUMG00000159645.4	PIK3R4	HGNC:8982
ENSG00000197013.10	95.7394	1.40835	0.222316	1.92587e-11	5.25217e-10	OTTHUMG00000182848.3	ZNF429	HGNC:20817
ENSG00000078018.20	65.998	1.69549	0.267895	1.93148e-11	5.25961e-10	OTTHUMG00000132962.7	MAP2	HGNC:6839
ENSG00000134030.14	849.049	-0.776541	0.120868	1.94118e-11	5.27815e-10	OTTHUMG00000132656.15	CTIF	HGNC:23925
ENSG00000112769.20	1107.28	0.712286	0.110488	1.96367e-11	5.33138e-10	OTTHUMG00000015386.10	LAMA4	HGNC:6484
ENSG00000226419.8	755.086	0.947168	0.148543	2.00866e-11	5.44543e-10	OTTHUMG00000012128.11	SLC16A1-AS1	HGNC:49445
ENSG00000221890.4	431.964	-0.922577	0.144645	2.07918e-11	5.62825e-10	OTTHUMG00000150458.3	NPTXR	HGNC:7954
ENSG00000132603.15	727.72	-0.63178	0.0976862	2.11678e-11	5.72158e-10	OTTHUMG00000137568.8	NIP7	HGNC:24328
ENSG00000102755.12	627.543	0.747718	0.116495	2.17121e-11	5.85139e-10	OTTHUMG00000016648.6	FLT1	HGNC:3763
ENSG00000167716.18	770.552	-0.720717	0.112178	2.18949e-11	5.89194e-10	OTTHUMG00000153941.8	WDR81	HGNC:26600
ENSG00000095787.23	6061.72	0.680718	0.105696	2.21401e-11	5.94918e-10	OTTHUMG00000017872.11	WAC	HGNC:17327
ENSG00000184277.13	990.957	-0.585752	0.0904826	2.26472e-11	6.07651e-10	OTTHUMG00000149872.5	TM2D3	HGNC:24128
ENSG00000123609.11	87.7732	1.35003	0.213813	2.29504e-11	6.14881e-10	OTTHUMG00000131867.5	NMI	HGNC:7854
ENSG00000071967.12	267.478	-0.925757	0.145653	2.31127e-11	6.18325e-10	OTTHUMG00000132260.4	CYBRD1	HGNC:20797
ENSG00000172986.13	279.687	-0.92246	0.145165	2.38395e-11	6.36836e-10	OTTHUMG00000158815.3	GXYLT2	HGNC:33383
ENSG00000148498.16	1726.79	0.58566	0.0905534	2.44482e-11	6.52142e-10	OTTHUMG00000017948.2	PARD3	HGNC:16051
ENSG00000065970.9	758.464	0.836396	0.131228	2.4758e-11	6.59443e-10	OTTHUMG00000168526.2	FOXJ2	HGNC:24818
ENSG00000237945.7	157.738	1.07372	0.169773	2.49972e-11	6.64845e-10	OTTHUMG00000065819.10	LINC00649	HGNC:44305
ENSG00000073712.15	2492	0.876093	0.137864	2.59361e-11	6.88814e-10	OTTHUMG00000140309.5	FERMT2	HGNC:15767
ENSG00000100292.17	719.508	-0.847303	0.13329	2.61267e-11	6.92869e-10	OTTHUMG00000150960.4	HMOX1	HGNC:5013
ENSG00000100209.10	344.065	0.90182	0.142063	2.67697e-11	7.07867e-10	OTTHUMG00000151092.2	HSCB	HGNC:28913
ENSG00000139445.18	166.727	-1.01585	0.160837	2.72722e-11	7.20112e-10	OTTHUMG00000152868.4	FOXN4	HGNC:21399
ENSG00000043143.20	211.63	-1.01008	0.160424	2.82754e-11	7.44449e-10	OTTHUMG00000129122.5	JADE2	HGNC:22984
ENSG00000165434.8	265.117	-0.932502	0.147597	2.86216e-11	7.52479e-10	OTTHUMG00000168132.2	PGM2L1	HGNC:20898
ENSG00000182544.8	414.297	-0.765742	0.120319	2.92716e-11	7.68463e-10	OTTHUMG00000170028.4	MFSD5	HGNC:28156
ENSG00000184178.16	487.502	-0.728132	0.114299	2.95024e-11	7.73411e-10	OTTHUMG00000160588.7	SCFD2	HGNC:30676
ENSG00000224903.2	215.307	1.3853	0.221669	2.99538e-11	7.8412e-10	OTTHUMG00000151509.2	AC005534.1
ENSG00000183943.6	902.255	-0.753925	0.118596	3.11917e-11	8.15357e-10	OTTHUMG00000021087.3	PRKX	HGNC:9441
ENSG00000279453.1	238.035	0.860346	0.135956	3.17936e-11	8.29903e-10	OTTHUMG00000175939.1	Z99129.4
ENSG00000283128.2	127.824	1.29376	0.206734	3.19388e-11	8.32504e-10	OTTHUMG00000191755.2	AC009403.2
ENSG00000258890.7	2131.31	0.627244	0.0980472	3.41776e-11	8.88325e-10	OTTHUMG00000179174.7	CEP95	HGNC:25141
ENSG00000008300.17	646.283	-0.889425	0.141153	3.48138e-11	9.03459e-10	OTTHUMG00000133544.3	CELSR3	HGNC:3230
ENSG00000091106.19	35.9441	2.16461	0.348612	3.48587e-11	9.03459e-10	OTTHUMG00000152107.8	NLRC4	HGNC:16412
ENSG00000008118.10	35.6188	2.47032	0.395807	3.56304e-11	9.22151e-10	OTTHUMG00000036361.5	CAMK1G	HGNC:14585
ENSG00000050165.18	111.154	1.32475	0.212562	3.64029e-11	9.4081e-10	OTTHUMG00000165709.4	DKK3	HGNC:2893
ENSG00000105982.16	151.351	1.02353	0.163175	3.68969e-11	9.52232e-10	OTTHUMG00000151440.3	RNF32	HGNC:17118
ENSG00000269837.1	206.576	1.02894	0.164123	3.74673e-11	9.6559e-10	OTTHUMG00000183233.1	IPO5P1	HGNC:49687
ENSG00000113319.13	274.044	0.786574	0.124445	3.83954e-11	9.88114e-10	OTTHUMG00000119015.6	RASGRF2	HGNC:9876
ENSG00000183696.14	462.811	0.708414	0.111796	4.06475e-11	1.04021e-09	OTTHUMG00000129253.4	UPP1	HGNC:12576
ENSG00000197008.9	591.044	0.744019	0.117538	4.06243e-11	1.04021e-09	OTTHUMG00000156603.4	ZNF138	HGNC:12922
ENSG00000198932.13	163.193	1.05556	0.168905	4.20539e-11	1.0747e-09	OTTHUMG00000022061.6	GPRASP1	HGNC:24834
ENSG00000126653.18	1908.27	0.801294	0.127177	4.24916e-11	1.08437e-09	OTTHUMG00000132754.8	NSRP1	HGNC:25305
ENSG00000162670.11	106.727	-1.18053	0.189827	4.55023e-11	1.15635e-09	OTTHUMG00000035533.7	BRINP3	HGNC:22393
ENSG00000214050.8	121.435	1.14513	0.184144	4.59757e-11	1.16676e-09	OTTHUMG00000102147.5	FBXO16	HGNC:13618
ENSG00000225697.13	684.595	-0.738467	0.117161	4.70481e-11	1.19067e-09	OTTHUMG00000186381.2	SLC26A6	HGNC:14472
ENSG00000183048.12	1832.47	-0.655055	0.103641	4.71257e-11	1.19098e-09	OTTHUMG00000178173.2	SLC25A10	HGNC:10980
ENSG00000267493.4	110.955	-1.57769	0.2557	5.03032e-11	1.26603e-09	OTTHUMG00000180146.4	CIRBP-AS1	HGNC:28588
ENSG00000064652.11	499.872	0.813935	0.129831	5.04476e-11	1.26792e-09	OTTHUMG00000128913.3	SNX24	HGNC:21533
ENSG00000129128.13	1727.2	-0.651549	0.103307	5.22442e-11	1.31127e-09	OTTHUMG00000160789.2	SPCS3	HGNC:26212
ENSG00000140451.13	294.866	-1.05109	0.169656	5.29034e-11	1.326e-09	OTTHUMG00000132974.4	PIF1	HGNC:26220
ENSG00000020256.20	1457.03	0.585559	0.092248	5.313e-11	1.32985e-09	OTTHUMG00000032756.3	ZFP64	HGNC:15940
ENSG00000114948.13	808.277	-0.632955	0.100122	5.41378e-11	1.35322e-09	OTTHUMG00000132919.5	ADAM23	HGNC:202
ENSG00000016391.11	1041.86	-0.677653	0.107658	5.61705e-11	1.40211e-09	OTTHUMG00000158281.5	CHDH	HGNC:24288
ENSG00000225756.1	31.9886	2.10991	0.34361	5.86457e-11	1.45991e-09	OTTHUMG00000020877.1	DBH-AS1	HGNC:24155
ENSG00000104660.19	828.535	0.78893	0.126404	6.13887e-11	1.52404e-09	OTTHUMG00000163820.7	LEPROTL1	HGNC:6555
ENSG00000213199.8	163.16	1.17296	0.19021	6.13111e-11	1.52404e-09	OTTHUMG00000158685.3	ASIC3	HGNC:101
ENSG00000181061.13	2429.81	-0.594202	0.0941707	6.19526e-11	1.53595e-09	OTTHUMG00000190394.1	HIGD1A	HGNC:29527
ENSG00000052802.13	587.282	-1.30207	0.212214	6.31773e-11	1.55997e-09	OTTHUMG00000161126.7	MSMO1	HGNC:10545
ENSG00000121775.18	769.36	0.704035	0.112441	6.45668e-11	1.58998e-09	OTTHUMG00000004020.10	TMEM39B	HGNC:25510
ENSG00000169258.7	934.899	-0.704849	0.112608	6.5272e-11	1.60518e-09	OTTHUMG00000130659.2	GPRIN1	HGNC:24835
ENSG00000119397.16	1458.42	0.709003	0.113157	6.63454e-11	1.62939e-09	OTTHUMG00000020581.7	CNTRL	HGNC:1858
ENSG00000150893.11	697.438	-1.17797	0.191788	6.65607e-11	1.63248e-09	OTTHUMG00000016759.5	FREM2	HGNC:25396
ENSG00000121753.12	1134.19	-0.655698	0.104521	6.76636e-11	1.65287e-09	OTTHUMG00000003885.6	ADGRB2	HGNC:944
ENSG00000116584.20	2164.93	0.787241	0.126547	6.94519e-11	1.68978e-09	OTTHUMG00000017464.11	ARHGEF2	HGNC:682
ENSG00000162227.8	520.249	-0.809188	0.130148	6.93778e-11	1.68978e-09	OTTHUMG00000167610.3	TAF6L	HGNC:17305
ENSG00000118961.15	241.418	-0.817383	0.131529	7.04343e-11	1.7114e-09	OTTHUMG00000122097.7	LDAH	HGNC:26145
ENSG00000231389.7	537.861	-0.90996	0.147121	7.1592e-11	1.73722e-09	OTTHUMG00000031058.7	HLA-DPA1	HGNC:4938
ENSG00000164308.17	318.273	0.695428	0.111254	7.41647e-11	1.79726e-09	OTTHUMG00000128718.4	ERAP2	HGNC:29499
ENSG00000171314.9	14862.5	-0.677456	0.108915	7.54564e-11	1.82614e-09	OTTHUMG00000018846.3	PGAM1	HGNC:8888
ENSG00000049449.9	7358.66	0.660453	0.105827	7.6341e-11	1.84267e-09	OTTHUMG00000166227.4	RCN1	HGNC:9934
ENSG00000168135.4	120.26	-1.65129	0.27182	7.91535e-11	1.90804e-09	OTTHUMG00000151131.1	KCNJ4	HGNC:6265
ENSG00000136378.15	363.918	-1.0331	0.168319	8.01513e-11	1.92954e-09	OTTHUMG00000172907.2	ADAMTS7	HGNC:223
ENSG00000088826.18	413.272	0.893412	0.144759	8.19137e-11	1.96938e-09	OTTHUMG00000031777.5	SMOX	HGNC:15862
ENSG00000124574.15	739.839	-0.832373	0.134686	8.26476e-11	1.98441e-09	OTTHUMG00000014733.5	ABCC10	HGNC:52
ENSG00000169131.13	596.392	0.78085	0.12585	8.35971e-11	2.00458e-09	OTTHUMG00000192653.2	ZNF354A	HGNC:11628
ENSG00000103707.10	360.491	-0.753616	0.121685	8.7404e-11	2.08492e-09	OTTHUMG00000172371.4	MTFMT	HGNC:29666
ENSG00000170464.10	634.081	0.688416	0.110836	8.81065e-11	2.09893e-09	OTTHUMG00000129225.6	DNAJC18	HGNC:28429
ENSG00000270170.2	244.715	-0.872888	0.141779	8.95265e-11	2.12998e-09	OTTHUMG00000184107.3	NCBP2AS2	HGNC:25121
[truncated: 1,825 more rows]
